# Supplementary material for: Age-related gene expression changes, and transcriptome wide association study of physical and cognitive aging traits, in the Lothian Birth Cohort 1936
Source: Aging (Albany NY). 2017 Dec 1;9(12):2489–503. doi: 10.18632/aging.101333 (PMC5764388; doi:10.18632/aging.101333)
Supplement: Supplementary file 1 [file aging-09-2489-s001.xlsx]

## Sheet: Supplementary Table 1 
Supplementary Table 1. Differentially expressed transcripts between the ages of 70 and 76 years. P<2.17xE-6 are shown in bold. r=correlation between expression levels at ages 70 and 76 years.
Probe	T	P	q	r	Symbol	Probe_Start	Chromosome
ILMN_3250023	-13.6414	1.68895e-35	3.88982e-31	0.214852		4778
ILMN_1815086	12.668	1.66854e-31	1.92141e-27	0.359298	NINJ1	1122	9
ILMN_3235325	12.5994	3.15425e-31	2.42152e-27	0.223456	SNHG10	2	14
ILMN_3236825	-12.5336	5.80267e-31	3.34103e-27	0.367025	RAPGEF5	6264	7
ILMN_1686464	-12.0074	7.20606e-29	3.31925e-25	0.224399		4454
ILMN_1791656	-11.7663	6.34977e-28	2.43736e-24	0.149883	EDRF1	4283	10
ILMN_3238435	11.6405	1.95962e-27	6.44744e-24	0.0963957	SNORA12	94	10
ILMN_1694810	11.6004	2.80053e-27	8.06238e-24	0.287924	PANX2	2860	22
ILMN_1684445	-11.4986	6.92519e-27	1.77216e-23	0.122719	FCRL5	4970	1
ILMN_1703593	11.4693	8.9865e-27	2.06968e-23	0.25605	BAIAP2L1	1818	7
ILMN_1756049	11.4467	1.09775e-26	2.29839e-23	0.299587	NT5DC3	6735	12
ILMN_1736863	-11.4201	1.38817e-26	2.66425e-23	0.163741	TMEM140	1397	7
ILMN_1688480	11.3071	3.76094e-26	6.66293e-23	0.460397	CCND1	4195	11
ILMN_3248223	11.2618	5.60194e-26	9.21559e-23	0.194472	PHB2	34	12
ILMN_1682717	11.099	2.32648e-25	3.57208e-22	0.323866		972
ILMN_1745820	-11.0433	3.77372e-25	5.43203e-22	0.348159	RASSF6	3640	4
ILMN_1749368	-11.0355	4.04041e-25	5.4738e-22	0.0936955	HIST1H3H	117	6
ILMN_1865764	10.9834	6.3442e-25	8.11741e-22	0.267141	ZMAT3	2556	3
ILMN_2412139	10.873	1.646e-24	1.99521e-21	0.282028	CABYR	2127	18
ILMN_1758623	-10.8421	2.14807e-24	2.42835e-21	0.204367	HIST1H2BD	36	6
ILMN_1659936	10.8386	2.2142e-24	2.42835e-21	0.139263	PPP1R15A	2237	19
ILMN_2105441	-10.7353	5.3686e-24	5.62019e-21	0.160388	ENAM	420	4
ILMN_1728106	10.6365	1.24708e-23	1.24677e-20	0.137607		1446
ILMN_1651496	-10.6316	1.29923e-23	1.24677e-20	0.223159	HIST1H2BD	541	6
ILMN_1657381	-10.52	3.34823e-23	3.08452e-20	0.315364	RASSF6	17	4
ILMN_1727813	-10.3847	1.04564e-22	9.26239e-20	0.225854	MPC2	436	1
ILMN_1652797	10.3334	1.60812e-22	1.37172e-19	0.391975	FAM174B	2519	15
ILMN_1696749	10.2823	2.46345e-22	2.02628e-19	0.248137	LMNA	1994	1
ILMN_1729980	10.2707	2.71266e-22	2.15432e-19	0.348972	RNF216	5503	7
ILMN_1751708	-10.2508	3.20338e-22	2.45924e-19	0.172264	ITM2B	713	13
ILMN_2327860	10.2405	3.48859e-22	2.5918e-19	0.288992	MAL	683	2
ILMN_1715603	10.2337	3.69255e-22	2.6576e-19	0.14506	IL23A	727	12
ILMN_1749403	10.2055	4.66801e-22	3.25785e-19	0.269166	TSPAN33	1964	7
ILMN_1694799	10.1782	5.85604e-22	3.96678e-19	0.160112	PIAS2	1680	18
ILMN_1793410	-10.1284	8.83897e-22	5.8163e-19	0.240416	MTBP	2804	8
ILMN_3247159	10.1172	9.69752e-22	6.20399e-19	0.111215	HAUS6	41	9
ILMN_1679727	-10.0481	1.71397e-21	1.06688e-18	0.080219		1190
ILMN_1700074	10.0115	2.31635e-21	1.40389e-18	0.18513		79
ILMN_1807667	-9.99471	2.65838e-21	1.56988e-18	0.290962	C14orf105	1607	14
ILMN_2082762	9.9327	4.4161e-21	2.54268e-18	0.120623	RPL13	2	16
ILMN_2415786	-9.9183	4.96729e-21	2.79029e-18	0.322902	CD96	3909	3
ILMN_1681301	-9.91153	5.24944e-21	2.87857e-18	0.273822	AIM2	981	1
ILMN_1711573	-9.87737	6.93452e-21	3.71416e-18	0.31606		4096
ILMN_1815527	-9.86746	7.5175e-21	3.9349e-18	0.258618	HBD	609	11
ILMN_1807633	-9.80702	1.22808e-20	6.28533e-18	0.321012		407
ILMN_1657234	9.78494	1.46861e-20	7.35294e-18	0.235157	CCL20	402	2
ILMN_2105223	-9.7793	1.53715e-20	7.53235e-18	0.190228	FCRL5	3794	1
ILMN_3193306	-9.76348	1.74706e-20	8.38263e-18	0.217646		561
ILMN_1797367	-9.72721	2.34142e-20	1.10051e-17	0.209367	TSC1	8096	9
ILMN_1784985	9.71256	2.63505e-20	1.21376e-17	0.151426	PRRT3	3622	3
ILMN_1773389	9.61125	5.9451e-20	2.68474e-17	0.2703	PLTP	1315	20
ILMN_1693452	9.60119	6.44305e-20	2.83958e-17	0.0766876	GAL3ST4	2390	7
ILMN_1799467	-9.59943	6.53458e-20	2.83958e-17	0.212435	SAMD9L	6889	7
ILMN_1806266	-9.55453	9.3532e-20	3.98914e-17	0.272019	RAP1GDS1	1937	4
ILMN_2085862	9.54341	1.02205e-19	4.27977e-17	0.346399	SLC15A3	1981	11
ILMN_1708728	-9.53557	1.08788e-19	4.47409e-17	0.240186	H2AFJ	412	12
ILMN_1690566	9.52984	1.13866e-19	4.6008e-17	0.217498	RASSF4	2339	10
ILMN_1689874	-9.48401	1.6392e-19	6.50902e-17	0.152105	HOXB-AS1	2328	17
ILMN_1803528	-9.46192	1.95315e-19	7.62422e-17	0.20493	LRRC31	2093	3
ILMN_1685856	9.43773	2.36565e-19	9.04815e-17	0.253296	FAM92A	246	8
ILMN_1792689	-9.43609	2.3965e-19	9.04815e-17	0.229241	HIST1H2AC	92	6
ILMN_3235051	9.42643	2.58674e-19	9.60892e-17	0.153865		2040	9
ILMN_3248575	9.40843	2.98219e-19	1.0902e-16	0.176665	KIAA0907	57	1
ILMN_3242586	-9.35877	4.41119e-19	1.58741e-16	0.273119	RHOU	4179	1
ILMN_1784661	-9.35438	4.56654e-19	1.61803e-16	0.250105	TMEM2	5704	9
ILMN_2358069	9.33529	5.30592e-19	1.85152e-16	0.315064	MAD1L1	2166	7
ILMN_1715131	9.32573	5.72004e-19	1.96624e-16	0.237092	CCR7	1978	17
ILMN_3270853	-9.30219	6.88006e-19	2.33021e-16	0.359024		418	8
ILMN_1731644	-9.29104	7.50855e-19	2.50622e-16	0.25487	SETDB2	2906	13
ILMN_1698218	9.26611	9.12663e-19	3.00279e-16	0.194326	TRAF1	3787	9
ILMN_2154603	-9.23741	1.14199e-18	3.7044e-16	0.00185557	ZNF830	1199	17
ILMN_1751851	-9.22729	1.23586e-18	3.95321e-16	0.322853	CECR1	2825	22
ILMN_1707312	-9.21342	1.37692e-18	4.3441e-16	0.275016	NFIL3	1732	9
ILMN_1746137	9.21016	1.4124e-18	4.39579e-16	0.299392	ST7	2794	7
ILMN_1768973	-9.19635	1.57273e-18	4.82953e-16	0.281724		309
ILMN_3241091	9.18223	1.75529e-18	5.25323e-16	0.202392	TMEM164	1859	X
ILMN_1658702	-9.18215	1.75632e-18	5.25323e-16	0.248814	HIST1H2BJ	28	6
ILMN_1776649	-9.17352	1.87825e-18	5.54588e-16	0.215998		7502
ILMN_1765994	-9.15809	2.11733e-18	6.17269e-16	0.210142	ZBP1	1777	20
ILMN_1773154	9.11501	2.95632e-18	8.51088e-16	0.22562	NFKBIA	992	14
ILMN_1752269	-9.10242	3.25872e-18	9.26563e-16	0.212081	ACSS1	4192	20
ILMN_1704353	9.0798	3.88075e-18	1.07693e-15	0.18053	IGSF3	6841	1
ILMN_3237446	9.07979	3.88107e-18	1.07693e-15	0.264475		4
ILMN_1779376	9.05062	4.86002e-18	1.33251e-15	0.228918	GSK3B	1503	3
ILMN_1794875	9.02663	5.845e-18	1.58372e-15	0.284942	GPAT3	2111	4
ILMN_1792518	-9.01341	6.4701e-18	1.73271e-15	0.298827		747
ILMN_1800276	8.99384	7.51863e-18	1.99036e-15	0.245666		1989
ILMN_1689786	8.97962	8.3846e-18	2.19438e-15	0.43038		1835
ILMN_2095660	-8.95317	1.02662e-17	2.65663e-15	0.484255		1805
ILMN_1749287	8.94844	1.06437e-17	2.72372e-15	0.234264	TLR6	2583	4
ILMN_2320330	8.93107	1.21536e-17	3.0472e-15	0.223903	MAL	534	2
ILMN_2328094	-8.93087	1.21724e-17	3.0472e-15	0.255008	DACT1	3231	14
ILMN_2124361	-8.90201	1.51693e-17	3.75661e-15	0.0864035	LEAP2	272	5
ILMN_1713347	-8.89972	1.54355e-17	3.78187e-15	0.266669	CHL1	5866	3
ILMN_3251737	8.8836	1.74515e-17	4.23079e-15	0.19867	EEF1A1	3414	6
ILMN_3248057	-8.87989	1.79504e-17	4.3064e-15	0.322495		1398
ILMN_1692698	8.85212	2.21661e-17	5.26296e-15	0.285839	VASH2	3346	1
ILMN_1739576	8.84954	2.26045e-17	5.31229e-15	0.288195	CYB5R2	1205	11
ILMN_1705114	-8.84682	2.30757e-17	5.36826e-15	0.297313		2875
ILMN_2082314	8.80423	3.18599e-17	7.33765e-15	0.296492	TOM1	2215	22
ILMN_1796179	-8.801	3.26467e-17	7.4079e-15	0.296468		747
ILMN_1813314	-8.80035	3.28082e-17	7.4079e-15	0.228033		53
ILMN_1816342	8.77989	3.82888e-17	8.56144e-15	0.540567		1096
ILMN_3205264	-8.76354	4.33164e-17	9.59251e-15	0.274672		1243
ILMN_1792951	-8.76199	4.38237e-17	9.61241e-15	0.191715	ZHX2	3830	8
ILMN_1690217	-8.75692	4.55296e-17	9.89237e-15	0.558708		1351
ILMN_1738093	8.75431	4.64365e-17	9.99514e-15	0.328178	RNFT2	1619	12
ILMN_1767509	-8.74746	4.88945e-17	1.03851e-14	0.285227	DEF8	3537	16
ILMN_1751120	-8.74676	4.91501e-17	1.03851e-14	0.286291	HIST1H4H	286	6
ILMN_1785161	8.72273	5.8886e-17	1.23155e-14	0.147165	CHCHD6	636	3
ILMN_2083789	-8.72168	5.93558e-17	1.23155e-14	0.181836	C14orf105	2151	14
ILMN_3246206	8.71455	6.26199e-17	1.28768e-14	0.157199	SNORA79	5	14
ILMN_1753139	8.70521	6.71687e-17	1.36899e-14	0.210771	ZG16B	449	16
ILMN_1684045	8.69812	7.0837e-17	1.43109e-14	0.0661925		1467
ILMN_1660900	8.66874	8.82723e-17	1.76783e-14	0.160397		87
ILMN_1832656	-8.66605	9.00714e-17	1.78831e-14	0.0864023	HIST1H2BH	485	6
ILMN_1723141	-8.64213	1.07695e-16	2.11994e-14	0.163517	OTUD1	2578	10
ILMN_1705686	-8.63537	1.13273e-16	2.19855e-14	0.220548	NRGN	961	11
ILMN_3245365	8.63499	1.13598e-16	2.19855e-14	0.206765	RPSA	94	3
ILMN_1718977	8.61377	1.3307e-16	2.55394e-14	0.159925	GADD45B	1169	19
ILMN_1774982	8.60016	1.47254e-16	2.80281e-14	0.39247		821
ILMN_3250902	-8.57766	1.74073e-16	3.28613e-14	0.148828	CLEC2D	4594	12
ILMN_1742260	-8.56959	1.84827e-16	3.46078e-14	0.221225	SSFA2	3539	2
ILMN_1771084	-8.55496	2.06009e-16	3.82629e-14	0.239515	ACSM3	1673	16
ILMN_1789596	8.55106	2.12067e-16	3.90729e-14	0.193756	ETV6	5746	12
ILMN_1714444	-8.54449	2.22639e-16	4.06953e-14	0.212285	KLF12	10251	13
ILMN_1763228	8.54015	2.29917e-16	4.1429e-14	0.228305	MEF2D	5657	1
ILMN_2176768	-8.53995	2.30251e-16	4.1429e-14	0.184427		2446
ILMN_1801068	-8.52373	2.59631e-16	4.63531e-14	0.187939	DACT1	3177	14
ILMN_1750678	-8.5164	2.7408e-16	4.85564e-14	0.215908	TIMD4	1008	5
ILMN_1656057	8.50771	2.92257e-16	5.13815e-14	0.186843	PLAU	2049	10
ILMN_1804445	-8.50505	2.98051e-16	5.20031e-14	0.121091	ATF7IP2	3284	16
ILMN_3245471	8.50363	3.01204e-16	5.21581e-14	0.133305	SCARNA20	27	17
ILMN_1750864	-8.50159	3.05779e-16	5.25552e-14	0.162554	NIN	6296	14
ILMN_1814726	-8.49453	3.22139e-16	5.49569e-14	0.315013	SCARB2	4542	4
ILMN_1810374	-8.48746	3.39382e-16	5.74729e-14	0.495211		1036
ILMN_1722811	-8.48286	3.51085e-16	5.90208e-14	0.0875593	CDKN1B	1679	12
ILMN_3235096	8.46856	3.90087e-16	6.51021e-14	0.218545	EIF5	58	14
ILMN_1788108	-8.44793	4.54039e-16	7.52301e-14	0.228827	TXNDC5	2595	6
ILMN_1801246	-8.39931	6.48648e-16	1.06707e-13	0.215365	IFITM2	619	11
ILMN_1707763	8.39555	6.66753e-16	1.08908e-13	0.302285		1620
ILMN_1750321	-8.39092	6.89735e-16	1.11868e-13	0.152441	TRANK1	8531	3
ILMN_1781431	-8.38894	6.99796e-16	1.12706e-13	0.329566	GLCCI1	2667	7
ILMN_1662470	8.38211	7.35635e-16	1.17656e-13	0.131423	C10orf35	864	10
ILMN_1789702	8.3807	7.4325e-16	1.18054e-13	0.329608		2381
ILMN_2083833	-8.37068	7.99723e-16	1.26154e-13	0.0691504	CNOT6L	4937	4
ILMN_2338997	8.36626	8.25944e-16	1.29403e-13	0.35106		1816
ILMN_2256359	-8.35748	8.8063e-16	1.37039e-13	0.167276	ZNF823	2291	19
ILMN_1789233	8.35624	8.88617e-16	1.37354e-13	0.202933	VPS37C	2595	11
ILMN_3242900	-8.352	9.16551e-16	1.40727e-13	0.231902		203
ILMN_1697220	-8.34874	9.38537e-16	1.43149e-13	0.256297	NT5E	3066	6
ILMN_2152581	-8.34335	9.76169e-16	1.47909e-13	0.143479	STK38	3108	6
ILMN_3247636	8.33835	1.01239e-15	1.52395e-13	0.109473	SCARNA14	80	15
ILMN_1732071	-8.33478	1.03905e-15	1.55392e-13	0.169278	HIST2H2BE	1804	1
ILMN_1766573	8.32968	1.07838e-15	1.60233e-13	0.127365	TERC	122	3
ILMN_2230862	-8.3163	1.18867e-15	1.74906e-13	0.189047		1419
ILMN_1894388	-8.31563	1.19444e-15	1.74906e-13	0.391482	RAP1GDS1	510	4
ILMN_1657129	-8.315	1.19991e-15	1.74906e-13	0.169805	SKAP2	3298	7
ILMN_1673369	-8.31354	1.21269e-15	1.75657e-13	0.224341		2073
ILMN_1686645	-8.30047	1.33357e-15	1.91959e-13	0.146611	UTP14C	5269	13
ILMN_1683313	-8.29794	1.35823e-15	1.94294e-13	0.326594	ST3GAL1	2501	8
ILMN_2262444	-8.29331	1.40467e-15	1.99698e-13	-0.0161601		2824
ILMN_2374340	8.28025	1.5443e-15	2.18201e-13	0.288911	PLAUR	842	19
ILMN_1681882	8.27894	1.55898e-15	2.18932e-13	0.290543	CETP	1150	16
ILMN_1780582	8.26723	1.69705e-15	2.36877e-13	0.253477	CD83	1909	6
ILMN_1700733	-8.26483	1.72677e-15	2.39574e-13	0.162136	FAM214A	3274	15
ILMN_1814686	-8.24409	2.00631e-15	2.76691e-13	0.259921	BCO1	2348	16
ILMN_2323048	-8.24133	2.04669e-15	2.80579e-13	0.148926	ERP29	946	12
ILMN_1791296	-8.23983	2.06901e-15	2.81961e-13	0.132818		4470
ILMN_2184373	8.23545	2.13556e-15	2.89319e-13	0.040421	CXCL8	1345	4
ILMN_1661197	-8.23413	2.1559e-15	2.90365e-13	0.207534	CLCF1	1555	11
ILMN_1795778	8.23229	2.18477e-15	2.92543e-13	0.26305		2067
ILMN_3246274	-8.22141	2.3633e-15	3.14619e-13	0.190428		2077
ILMN_1674661	8.21406	2.49187e-15	3.29829e-13	-0.0309788	CIRBP	994	19
ILMN_1684271	8.20727	2.61679e-15	3.44384e-13	0.24814	ACBD6	839	1
ILMN_2106167	-8.19473	2.86409e-15	3.74789e-13	0.4553	RAP1GDS1	2021	4
ILMN_2367141	8.17941	3.19772e-15	4.16082e-13	0.111467	TCF7	511	5
ILMN_2144426	-8.1749	3.30314e-15	4.27385e-13	0.313348		478
ILMN_1676470	8.1653	3.53885e-15	4.55325e-13	0.226346	TCF7	627	5
ILMN_2366719	8.16428	3.56489e-15	4.56128e-13	0.171571	NSFL1C	3316	20
ILMN_1699695	-8.16009	3.67359e-15	4.67439e-13	0.24583	TNFRSF21	3356	6
ILMN_1758146	8.15416	3.83337e-15	4.85089e-13	0.170519	SIRPA	3940	20
ILMN_1753639	-8.13373	4.43761e-15	5.58484e-13	0.22236	MTAP	4645	9
ILMN_1698484	8.12771	4.63288e-15	5.7989e-13	0.137653	RHOV	910	15
ILMN_1682402	8.11483	5.07995e-15	6.32413e-13	0.222979	SNORD46	17	1
ILMN_2328666	8.10958	5.27411e-15	6.53054e-13	0.248047	CD83	1628	6
ILMN_1783337	8.10435	5.47504e-15	6.74308e-13	0.459443		1339
ILMN_1788489	-8.09415	5.88836e-15	7.21356e-13	0.185827		290
ILMN_3244343	8.07815	6.5997e-15	8.0422e-13	0.163908	RPL23	46	17
ILMN_1848843	-8.07138	6.9257e-15	8.39504e-13	0.16469		564
ILMN_1763605	-8.06546	7.22389e-15	8.71065e-13	0.0766406	DIDO1	7303	20
ILMN_1705390	8.06178	7.41561e-15	8.89526e-13	0.268248	KLHL22	2454	22
ILMN_1756238	-8.04066	8.61646e-15	1.02822e-12	0.285579	TMEM217	1368	6
ILMN_2048043	8.03527	8.95238e-15	1.0628e-12	0.442405		66
ILMN_3239284	8.03331	9.07807e-15	1.07219e-12	0.208652		590
ILMN_1652790	-8.02005	9.97307e-15	1.17189e-12	0.0499644		531
ILMN_1757406	-8.01651	1.02265e-14	1.19557e-12	0.27945	HIST1H1C	551	6
ILMN_1740170	8.01481	1.03503e-14	1.20393e-12	0.241032		419
ILMN_1737394	8.01379	1.04258e-14	1.20662e-12	0.137545	LMNA	1797	1
ILMN_1754458	-8.00691	1.09456e-14	1.26044e-12	0.191902		26702
ILMN_1713807	-8.00478	1.11126e-14	1.27331e-12	0.253749	MAN1C1	2456	1
ILMN_1810962	-8.00126	1.13925e-14	1.29792e-12	0.209904		5592
ILMN_1849013	-8.00067	1.14402e-14	1.29792e-12	0.239731		770
ILMN_1808707	7.99698	1.17427e-14	1.32572e-12	0.249813	FSCN1	2632	7
ILMN_1715173	7.96267	1.49626e-14	1.68099e-12	0.168887	RPS6KA1	3077	1
ILMN_3235264	7.94969	1.6396e-14	1.83309e-12	0.139306	EIF4A1	1	17
ILMN_1714349	-7.9425	1.72473e-14	1.91895e-12	0.17946	GLCE	4716	15
ILMN_2369666	7.93329	1.84016e-14	2.03753e-12	0.284933	CR2	3488	1
ILMN_1810684	-7.91813	2.04706e-14	2.25579e-12	0.20659		1380
ILMN_1675191	-7.91031	2.16261e-14	2.3623e-12	0.352889	GAPT	1880	5
ILMN_1763452	-7.90957	2.17392e-14	2.3623e-12	0.208195	EVI2B	1440	17
ILMN_2246510	-7.9094	2.17651e-14	2.3623e-12	0.149372	TSC1	8415	9
ILMN_3237448	-7.90886	2.18475e-14	2.3623e-12	0.399766	BEND5	938	1
ILMN_2395214	7.90762	2.20386e-14	2.37183e-12	0.123827	PRPF40B	10254	12
ILMN_1669113	7.90237	2.28653e-14	2.44935e-12	0.333786	ATF5	1901	19
ILMN_1756701	7.90161	2.29872e-14	2.45101e-12	0.24127		1489
ILMN_1744118	7.9004	2.31837e-14	2.46057e-12	0.168938	ASTN2	4563	9
ILMN_1857335	7.89518	2.40466e-14	2.54045e-12	0.136809	NALT1	2034	9
ILMN_1692650	7.8842	2.59688e-14	2.73099e-12	0.246363	RCC1L	2201	7
ILMN_1680965	7.88047	2.66566e-14	2.79058e-12	0.374298		189
ILMN_1655433	7.87962	2.68159e-14	2.79456e-12	0.136648		852
ILMN_1698213	7.86251	3.0225e-14	3.13564e-12	0.125619		453
ILMN_3237956	7.85368	3.21472e-14	3.3201e-12	0.119948	ZC3H12C	8305	11
ILMN_2043918	-7.85041	3.28892e-14	3.38157e-12	0.347198	DLEU1	415	13
ILMN_1716382	-7.84838	3.33596e-14	3.41469e-12	0.275999	C12orf75	491	12
ILMN_1690253	7.84756	3.35493e-14	3.41891e-12	0.26511	SYNPO2L	3336	10
ILMN_1662741	7.84297	3.46414e-14	3.51465e-12	0.348196	LPAR2	1679	19
ILMN_1659913	-7.82641	3.88787e-14	3.92726e-12	0.249745	ISG20	849	15
ILMN_1726678	7.82316	3.97707e-14	3.99982e-12	0.269967		369
ILMN_1860638	-7.82033	4.05609e-14	4.06156e-12	0.217459	ST3GAL1	3635	8
ILMN_1763080	7.81937	4.08324e-14	4.07105e-12	0.22987	QARS	2316	3
ILMN_1696590	7.81669	4.16016e-14	4.12986e-12	0.1874	CHST4	1905	16
ILMN_1663538	7.81568	4.18959e-14	4.14122e-12	0.290623	CLYBL	1067	13
ILMN_1812262	7.81053	4.3423e-14	4.27383e-12	0.20848		3511
ILMN_1715680	7.80756	4.43308e-14	4.34461e-12	0.270986		2356
ILMN_1726456	7.80238	4.59531e-14	4.48452e-12	0.188155	SLC3A2	1728	11
ILMN_1671478	7.79385	4.87606e-14	4.73697e-12	0.215478	CKB	1221	14
ILMN_2233783	-7.79329	4.89513e-14	4.73697e-12	0.233384	CD38	1064	4
ILMN_3303101	-7.79231	4.92829e-14	4.7491e-12	0.225665		364	19
ILMN_1683694	7.78934	5.03118e-14	4.82804e-12	0.247549	SLC6A4	2426	17
ILMN_1684724	7.78803	5.07682e-14	4.85163e-12	0.260714	CR2	3583	1
ILMN_1721669	7.77713	5.47575e-14	5.21124e-12	0.249374	IDH3B	1509	20
ILMN_1699925	7.776	5.51871e-14	5.23051e-12	0.453456	TGM5	1698	15
ILMN_1910948	-7.76137	6.10745e-14	5.76478e-12	0.145159		4192	6
ILMN_1782050	-7.75853	6.22888e-14	5.8554e-12	0.295256	CEBPD	948	8
ILMN_1654560	7.74928	6.64024e-14	6.21672e-12	0.278599		1887
ILMN_1742705	7.74779	6.70923e-14	6.25588e-12	0.229408	SLC39A11	2476	17
ILMN_1728071	-7.74671	6.75931e-14	6.27716e-12	0.154635	KRAS	4967	12
ILMN_1659106	7.73861	7.14834e-14	6.61178e-12	0.111309	PHLDA3	1324	1
ILMN_1670134	-7.73707	7.22483e-14	6.6558e-12	0.0834237	FADS2	3838	11
ILMN_1806293	-7.73416	7.37136e-14	6.76373e-12	0.131578	LIN7A	1038	12
ILMN_2289593	-7.72806	7.68881e-14	7.02703e-12	0.269549	FXYD2	16	11
ILMN_1736911	7.71651	8.32627e-14	7.57954e-12	0.361588	TMOD1	1406	9
ILMN_1651832	7.70617	8.94103e-14	8.10712e-12	0.281984	EHD1	3319	11
ILMN_1726417	-7.70217	9.19094e-14	8.30104e-12	0.280442	MRPL33	124	2
ILMN_1814305	-7.69909	9.38734e-14	8.44531e-12	0.214593	SAMD9	6583	7
ILMN_1767365	7.69597	9.59168e-14	8.59556e-12	0.212867	PAK1	2961	11
ILMN_1774742	-7.69049	9.95969e-14	8.89076e-12	0.289834	MTTP	3319	4
ILMN_1750181	7.68818	1.01195e-13	8.99856e-12	0.403111	TESC	737	12
ILMN_1726815	-7.68622	1.02562e-13	9.08502e-12	0.156559	HIST1H3G	387	6
ILMN_1659047	-7.67075	1.14064e-13	1.00651e-11	0.219886		1
ILMN_2386982	7.66605	1.17802e-13	1.03553e-11	0.33972	PRKCZ	2235	1
ILMN_1821280	-7.66365	1.19761e-13	1.04875e-11	0.27391	SARNP	2234	12
ILMN_1723020	-7.65214	1.2959e-13	1.13053e-11	0.188373	MAP3K1	7255	5
ILMN_1705310	-7.64054	1.40306e-13	1.21939e-11	0.156814	VEZF1	4448	17
ILMN_1733579	-7.63914	1.41654e-13	1.22648e-11	0.215626	EVI2A	1034	17
ILMN_1702175	7.63664	1.44103e-13	1.24301e-11	0.261044	ST7	1851	7
ILMN_1734198	-7.6347	1.46024e-13	1.25488e-11	0.302887	RNGTT	4330	6
ILMN_1703123	7.63046	1.50317e-13	1.28697e-11	0.22677	CSRNP1	3107	3
ILMN_1736510	-7.62311	1.58069e-13	1.34833e-11	0.142177		5268
ILMN_1786050	7.62194	1.59333e-13	1.3541e-11	0.119056	RBBP9	3703	20
ILMN_1696846	-7.61236	1.7011e-13	1.44037e-11	0.197769		103
ILMN_2038775	7.6117	1.7087e-13	1.44151e-11	0.399212	TUBB2A	1401	6
ILMN_2098126	7.60729	1.76093e-13	1.48015e-11	0.214731		1149
ILMN_1697267	7.5968	1.89151e-13	1.58412e-11	0.327298	PRKCZ	1828	1
ILMN_1819494	-7.58443	2.05782e-13	1.71716e-11	0.251306	TNFAIP8	543	5
ILMN_1684873	-7.57606	2.17836e-13	1.81118e-11	0.182444	ARSD	4890	X
ILMN_1664922	7.57502	2.19378e-13	1.81745e-11	0.194048	FLNB	9084	3
ILMN_1799082	-7.56836	2.29539e-13	1.89481e-11	0.157398	ZNF609	8350	15
ILMN_1677098	-7.55874	2.45056e-13	2.01567e-11	0.230561	YPEL2	4412	17
ILMN_2160727	7.55605	2.49566e-13	2.04547e-11	0.265524	CYTH3	3968	7
ILMN_1651433	-7.5494	2.61083e-13	2.13227e-11	0.194626	DCK	1494	4
ILMN_2070300	7.54744	2.64589e-13	2.15327e-11	0.220512		786
ILMN_2222234	-7.54458	2.69758e-13	2.18761e-11	0.255236		775
ILMN_1754858	7.54085	2.76677e-13	2.23584e-11	0.25453		3740
ILMN_3237623	7.53937	2.79461e-13	2.25044e-11	0.257796		34
ILMN_1699980	7.53551	2.86861e-13	2.30198e-11	0.127524	TSPAN18	2977	11
ILMN_1757408	7.53499	2.8787e-13	2.30206e-11	0.120261	ZNF256	2119	19
ILMN_1670638	7.53402	2.89783e-13	2.30934e-11	0.216918	PITPNC1	1096	17
ILMN_1669598	7.53267	2.92443e-13	2.31925e-11	0.155881	KMT5B	1242	11
ILMN_1675024	-7.53237	2.93041e-13	2.31925e-11	0.373494	BEND5	873	1
ILMN_1732410	7.53143	2.949e-13	2.32598e-11	0.329079	SLC16A9	3302	10
ILMN_1668822	7.52876	3.00276e-13	2.3603e-11	0.213227	BATF	816	14
ILMN_3249167	7.52271	3.12829e-13	2.4506e-11	0.171862	EIF4A2	86	3
ILMN_2098013	7.5213	3.15835e-13	2.46173e-11	0.265215	CETP	1733	16
ILMN_1667022	7.52104	3.16388e-13	2.46173e-11	0.276247		3900
ILMN_1781752	7.52001	3.18605e-13	2.47063e-11	0.266096	CLEC16A	6408	16
ILMN_1660871	7.51517	3.29211e-13	2.54431e-11	0.296848	NEK6	2429	9
ILMN_1651819	7.50558	3.51246e-13	2.70553e-11	0.290618	GALNT11	2238	7
ILMN_1760556	-7.48957	3.9133e-13	3.00424e-11	0.18443	RSRP1	2044	1
ILMN_1677402	7.47838	4.21985e-13	3.22882e-11	0.244455	C11orf96	1672	11
ILMN_1782551	-7.46575	4.59453e-13	3.50386e-11	0.16882		960
ILMN_1778444	7.45292	5.00827e-13	3.80678e-11	0.401436	FKBP5	3433	6
ILMN_3190482	-7.45199	5.03982e-13	3.81816e-11	0.350125		208
ILMN_1733690	-7.44636	5.23412e-13	3.95236e-11	0.285519	AKAP7	1951	6
ILMN_3240586	7.44357	5.33321e-13	4.01403e-11	0.236829		2490
ILMN_2102960	-7.4409	5.42962e-13	4.07327e-11	0.194509	FAM214A	3572	15
ILMN_1723912	-7.41505	6.45672e-13	4.82807e-11	0.251953	IFI44L	1647	1
ILMN_1658847	7.41422	6.49278e-13	4.83933e-11	0.230277		2480
ILMN_1782389	7.41076	6.64492e-13	4.93675e-11	0.298922	LAD1	2357	1
ILMN_1662038	7.40685	6.82083e-13	5.05114e-11	0.365158	LARGE1	4102	22
ILMN_3235969	7.40584	6.86745e-13	5.06937e-11	0.179738	SNHG15	18	7
ILMN_1783798	-7.39847	7.21407e-13	5.30822e-11	0.340594	GAS8	2936	16
ILMN_2345564	7.39691	7.28984e-13	5.34689e-11	0.451457	TGM5	1728	15
ILMN_1652128	-7.3916	7.5529e-13	5.52225e-11	0.210278	LMBRD1	1576	6
ILMN_1664047	7.38643	7.81809e-13	5.6902e-11	0.474674	CACNA1E	9561	1
ILMN_1787280	7.38617	7.83203e-13	5.6902e-11	0.0558986	AUNIP	1973	1
ILMN_1782729	-7.3831	7.99412e-13	5.7897e-11	0.248158	CLECL1	255	12
ILMN_1749641	-7.38262	8.01948e-13	5.78986e-11	0.262066		1419
ILMN_1689212	-7.37257	8.57575e-13	6.17213e-11	0.231448	RSPH4A	2563	6
ILMN_1681674	7.36383	9.08995e-13	6.52183e-11	0.259572		280
ILMN_1805158	-7.36072	9.27989e-13	6.63551e-11	0.209359	TAF1A	1162	1
ILMN_2367818	7.35985	9.33387e-13	6.63551e-11	0.330456	CD40	1483	20
ILMN_1685679	-7.3596	9.34961e-13	6.63551e-11	0.266018	RNF146	1282	6
ILMN_1662795	-7.35937	9.36365e-13	6.63551e-11	0.283662	CA2	1004	8
ILMN_1797359	-7.35388	9.71206e-13	6.8613e-11	0.087458	TRIM5	417	11
ILMN_1732981	7.35182	9.84616e-13	6.93477e-11	0.284916	ZBTB32	1832	19
ILMN_1691731	-7.35057	9.92825e-13	6.97127e-11	0.0794076	PARP14	6513	3
ILMN_1716218	-7.34902	1.00314e-12	7.02228e-11	0.679094		167
ILMN_1812278	7.34773	1.01177e-12	7.06122e-11	0.422564	LY9	1212	1
ILMN_1677824	-7.34329	1.04208e-12	7.25081e-11	0.226222	RAB4A	1546	1
ILMN_1912287	-7.34175	1.05283e-12	7.30354e-11	0.259591	SUCNR1	324	3
ILMN_1677085	-7.3353	1.09891e-12	7.59761e-11	0.113011	RGS19	1290	20
ILMN_1711611	7.3349	1.10182e-12	7.59761e-11	0.275535		347
ILMN_1680738	-7.33374	1.11037e-12	7.63368e-11	0.359081		1690
ILMN_2160476	7.32738	1.15827e-12	7.93933e-11	0.209282	CCL22	2577	16
ILMN_1676528	-7.32146	1.20465e-12	8.23272e-11	0.676497	BTN3A2	3377	6
ILMN_1653432	-7.32075	1.21032e-12	8.24701e-11	0.142639	HNRNPDL	1875	4
ILMN_1765310	7.32011	1.21548e-12	8.25774e-11	0.203849	TCEAL2	970	X
ILMN_2337928	7.317	1.24076e-12	8.40324e-11	0.256915	CXCR5	2621	11
ILMN_1729198	-7.31627	1.24677e-12	8.40324e-11	0.274715		93
ILMN_1730931	-7.31614	1.24784e-12	8.40324e-11	0.241002	RUFY3	3852	4
ILMN_1709604	7.3151	1.25649e-12	8.43679e-11	0.174567	RPS2	82	16
ILMN_1712088	7.31157	1.2862e-12	8.61119e-11	0.283572	CLYBL	970	13
ILMN_1724718	7.30747	1.32166e-12	8.82294e-11	0.168691	NCK2	2199	2
ILMN_1747281	7.30684	1.32718e-12	8.83418e-11	0.234753	EVI5L	3635	19
ILMN_1730351	-7.30628	1.33211e-12	8.84142e-11	0.304286	TEX19	1816	17
ILMN_1802653	7.30271	1.36393e-12	9.00241e-11	0.0967184	EBI3	821	19
ILMN_3244323	-7.30269	1.36418e-12	9.00241e-11	0.263994		1547	1
ILMN_3238221	-7.30157	1.37425e-12	9.04298e-11	0.52899		6820
ILMN_3247018	7.29763	1.41062e-12	9.25581e-11	0.203288		82
ILMN_1786429	-7.28619	1.52141e-12	9.95444e-11	0.357249	LPAR6	1244	13
ILMN_2409167	-7.28218	1.56229e-12	1.01827e-10	0.345645	ANXA2	1130	15
ILMN_1768751	7.2819	1.56514e-12	1.01827e-10	0.179169	MTA3	1546	2
ILMN_2352090	7.27929	1.59243e-12	1.03311e-10	0.294922	GPRC5C	1715	17
ILMN_1894821	-7.24351	2.01584e-12	1.30412e-10	0.158579		1845	3
ILMN_3239574	7.24161	2.04125e-12	1.31686e-10	0.182785		138
ILMN_1719695	7.23543	2.12585e-12	1.36761e-10	0.217389	NFKBIZ	3450	3
ILMN_1657871	-7.23455	2.13817e-12	1.3717e-10	0.288511	RSAD2	2250	2
ILMN_1716468	-7.23256	2.16642e-12	1.38597e-10	0.241289	NUDT16P1	1374	3
ILMN_1659270	7.23207	2.17333e-12	1.38654e-10	0.188201	OTP	2267	5
ILMN_1719097	-7.23062	2.19418e-12	1.39597e-10	0.205557	C18orf8	1833	18
ILMN_1686152	7.22845	2.22573e-12	1.41214e-10	0.299419	GGA2	5106	16
ILMN_3181328	-7.22109	2.33591e-12	1.47797e-10	0.301663		2238
ILMN_1715273	-7.21913	2.36606e-12	1.49295e-10	0.0457771	PICALM	3102	11
ILMN_1797191	-7.21626	2.41118e-12	1.51726e-10	0.194706	KIAA0040	4187	1
ILMN_1713058	7.21325	2.45917e-12	1.54325e-10	0.288092	PSTPIP2	2670	18
ILMN_3242271	-7.21233	2.47411e-12	1.5484e-10	0.273348	GAPT	1552	5
ILMN_1664776	-7.20722	2.55828e-12	1.59674e-10	0.148712	EFR3A	4826	8
ILMN_2298366	7.20153	2.65561e-12	1.65301e-10	0.186611	TLR10	469	4
ILMN_1829989	-7.19876	2.70411e-12	1.67525e-10	0.182625	ZEB1-AS1	1793	10
ILMN_1798964	7.19851	2.70863e-12	1.67525e-10	0.1675	LINC01869	655	19
ILMN_1727080	-7.19825	2.71317e-12	1.67525e-10	0.166396	MYO6	4064	6
ILMN_1699476	-7.19731	2.72994e-12	1.6811e-10	0.285088		1383
ILMN_1685540	-7.19685	2.73821e-12	1.6817e-10	0.260308	SHROOM3	7110	4
ILMN_1762071	-7.19038	2.85658e-12	1.74973e-10	0.201007	C17orf80	1965	17
ILMN_2150654	7.18932	2.87653e-12	1.75728e-10	0.224643	ZSWIM4	4287	19
ILMN_1690921	-7.18538	2.95161e-12	1.79837e-10	0.165593	STAT2	4317	12
ILMN_1807042	7.17974	3.06239e-12	1.85906e-10	0.327305		2248
ILMN_1744912	7.1795	3.06736e-12	1.85906e-10	0.153244	CTTN	2860	11
ILMN_1791575	7.17639	3.13015e-12	1.89214e-10	0.165564	HNRNPLL	1751	2
ILMN_3234142	-7.17311	3.19796e-12	1.92807e-10	0.366017		954
ILMN_2385688	7.16571	3.35637e-12	2.01829e-10	0.112165		1961
ILMN_3241373	7.16212	3.43585e-12	2.0607e-10	0.121	SCARNA18	67	5
ILMN_3241021	7.15656	3.56281e-12	2.1313e-10	0.187761		44
ILMN_2403965	-7.14275	3.89802e-12	2.32578e-10	0.186066		1284
ILMN_2352121	-7.13976	3.97462e-12	2.36238e-10	0.262136		1098
ILMN_1685781	-7.13956	3.97986e-12	2.36238e-10	0.236269		871
ILMN_2317658	7.13487	4.10315e-12	2.42929e-10	0.131236	SLC3A2	1817	11
ILMN_1754579	-7.12882	4.2678e-12	2.5203e-10	0.168733	SYNE2	21052	14
ILMN_1698766	-7.12408	4.40139e-12	2.59254e-10	0.0944413	PYCARD	623	16
ILMN_2381697	7.12286	4.43633e-12	2.60646e-10	0.140762	P4HA2-AS1	1868	5
ILMN_1732615	7.11854	4.56252e-12	2.67088e-10	0.340228		1300
ILMN_1781472	-7.11832	4.56918e-12	2.67088e-10	0.207012	CDC42BPA	7464	1
ILMN_1755383	-7.11039	4.81064e-12	2.80491e-10	0.228364	LRRC1	2703	6
ILMN_3246935	7.10743	4.90362e-12	2.84721e-10	0.207139	SNORA74B	129	5
ILMN_3234762	7.1073	4.90792e-12	2.84721e-10	0.253334		37
ILMN_2047112	7.09305	5.38276e-12	3.11483e-10	0.15829	DPCD	599	10
ILMN_1772487	7.08631	5.62289e-12	3.24191e-10	0.12444	SUGP2	3265	19
ILMN_1803652	7.0861	5.63051e-12	3.24191e-10	0.326597	TMEM268	3246	9
ILMN_2204876	7.08451	5.68878e-12	3.26729e-10	0.262825	FLVCR2	3391	14
ILMN_2165762	7.08028	5.8464e-12	3.34946e-10	0.0622153	RPL13A	11	19
ILMN_1678690	7.07979	5.86515e-12	3.35187e-10	0.206573	UPB1	1915	22
ILMN_1813191	-7.07776	5.94271e-12	3.38779e-10	0.640646		543
ILMN_1713266	-7.07664	5.98582e-12	3.40393e-10	0.153036	FAM46C	5557	1
ILMN_1695706	7.06771	6.34111e-12	3.59235e-10	0.118527	H3F3B	2533	17
ILMN_1736178	-7.06754	6.34833e-12	3.59235e-10	0.414144	AEBP1	3868	7
ILMN_1667199	7.0628	6.54548e-12	3.69241e-10	0.373821		1348
ILMN_1776519	7.06252	6.55724e-12	3.69241e-10	0.00390282	RAP1GAP	3184	1
ILMN_1664698	7.05858	6.72616e-12	3.7783e-10	0.212481	UNC119	1535	17
ILMN_1669064	-7.05571	6.85196e-12	3.8396e-10	0.0200347	ZNF823	2103	19
ILMN_1690907	-7.05498	6.88446e-12	3.84829e-10	0.186182		2758	6
ILMN_1787567	-7.05424	6.91715e-12	3.84829e-10	0.310679	TSC22D1	1239	13
ILMN_1781281	7.05423	6.91759e-12	3.84829e-10	0.164472	B9D1	686	17
ILMN_2110167	7.05271	6.98594e-12	3.87694e-10	0.294751	POLR1E	1762	9
ILMN_1751400	7.0515	7.04036e-12	3.89776e-10	0.33204	SKAP1	1481	17
ILMN_1746864	-7.04968	7.12374e-12	3.93445e-10	0.227647	CYTIP	1719	2
ILMN_1892498	-7.04917	7.14679e-12	3.93775e-10	0.303511		305	12
ILMN_1696126	7.04781	7.21002e-12	3.9631e-10	0.164005	STX18	1747	4
ILMN_1713688	7.04627	7.28196e-12	3.99311e-10	0.285376	DHX32	2732	10
ILMN_3242315	7.0422	7.47522e-12	4.08935e-10	0.164934		61
ILMN_2165473	-7.04158	7.50526e-12	4.09606e-10	0.317945	MID1IP1	2116	X
ILMN_1659544	7.04002	7.58122e-12	4.12773e-10	0.154773	STX3	2682	11
ILMN_1775501	7.03212	7.97667e-12	4.3328e-10	0.129426	IL1B	1133	2
ILMN_2370825	-7.0309	8.03953e-12	4.35667e-10	0.235597	ATM	12765	11
ILMN_2309926	-7.02784	8.19885e-12	4.43257e-10	0.25112	ZDHHC14	2205	6
ILMN_3243117	-7.0179	8.74013e-12	4.71415e-10	0.20738	TTC9	4059	14
ILMN_3269775	-7.01475	8.9185e-12	4.79911e-10	0.189528		389
ILMN_1800787	7.01388	8.96845e-12	4.81474e-10	0.256223	RFTN1	2891	3
ILMN_2398572	-7.00977	9.20812e-12	4.93191e-10	0.233248	FXYD2	497	11
ILMN_2081682	7.00694	9.37694e-12	5.01068e-10	0.314928	SMAP2	2417	1
ILMN_2390453	7.0064	9.40943e-12	5.0164e-10	0.164708	BCKDHB	1103	6
ILMN_1794056	7.00216	9.66879e-12	5.14277e-10	0.221102	DNAJB5	2069	9
ILMN_1681542	-6.99818	9.91906e-12	5.26373e-10	0.267606	HIST1H4E	276	6
ILMN_1882764	-6.99685	1.00037e-11	5.29644e-10	0.202996	UMAD1	886	7
ILMN_1668417	-6.99438	1.01633e-11	5.36858e-10	0.249175	WIPF1	3813	2
ILMN_1720440	-6.99219	1.03068e-11	5.43197e-10	0.152103		3122
ILMN_1760062	-6.99154	1.03502e-11	5.44237e-10	0.271247	IFI44	1310	1
ILMN_1656628	-6.98793	1.05925e-11	5.55045e-10	0.508605	WDR4	1339	21
ILMN_1701247	-6.98776	1.0604e-11	5.55045e-10	0.135041		6576
ILMN_2199439	-6.9859	1.07305e-11	5.60392e-10	0.276264	CA2	1111	8
ILMN_1742601	6.98521	1.07781e-11	5.61606e-10	0.235696	CR1	7345	1
ILMN_1753342	-6.97629	1.14113e-11	5.93261e-10	0.242585	SAT1	666	X
ILMN_1803398	6.96844	1.19985e-11	6.22382e-10	0.218439	SRF	4083	6
ILMN_1682727	-6.96435	1.23163e-11	6.37433e-10	0.103797	TAX1BP1	2803	7
ILMN_2381064	-6.95846	1.27885e-11	6.60385e-10	0.132516	TPD52	3875	8
ILMN_1708041	6.95116	1.33979e-11	6.90307e-10	0.284732	PLEKHF1	1556	19
ILMN_1794782	-6.94422	1.40035e-11	7.19898e-10	0.249779	ABCG1	2769	21
ILMN_1805064	6.94023	1.43643e-11	7.36803e-10	0.116799		46
ILMN_3250870	6.93692	1.46707e-11	7.50846e-10	0.00818211	USP46	7960	4
ILMN_1747052	-6.93583	1.47726e-11	7.54386e-10	0.265341	ITGA4	4213	2
ILMN_1679092	-6.93516	1.48357e-11	7.55931e-10	0.214799	RAB9B	836	X
ILMN_1886769	-6.93074	1.52591e-11	7.74394e-10	0.153695		179
ILMN_2396020	-6.93068	1.52653e-11	7.74394e-10	0.152119	DUSP6	2022	12
ILMN_1785268	6.92886	1.54426e-11	7.81669e-10	0.183915		367
ILMN_1725130	6.92725	1.56019e-11	7.87999e-10	0.249143	FAM50A	1260	X
ILMN_2391419	-6.89342	1.93393e-11	9.74622e-10	0.392691	SYNE2	21266	14
ILMN_1762803	-6.88913	1.98727e-11	9.99317e-10	0.0877715	RFX7	10052	15
ILMN_3236942	6.88862	1.9936e-11	1.00032e-09	0.119915		25
ILMN_1787251	-6.88615	2.02509e-11	1.01391e-09	0.488712	DAAM1	3631	14
ILMN_1693664	6.88511	2.03848e-11	1.0184e-09	0.147935	POMGNT1	2602	1
ILMN_1764609	-6.88379	2.05559e-11	1.02473e-09	0.291455	PWWP2B	2269	10
ILMN_1881081	-6.88208	2.07798e-11	1.03365e-09	0.126594	HIST1H3E	51	6
ILMN_1727689	6.87711	2.14435e-11	1.06436e-09	0.156193	TNFAIP2	3710	14
ILMN_1749081	6.8764	2.15398e-11	1.06684e-09	0.180572	AUTS2	5885	7
ILMN_1810191	6.87412	2.18532e-11	1.08004e-09	0.755231	PLA2G4C	2265	19
ILMN_1787843	6.86937	2.25185e-11	1.11054e-09	0.390861	HSDL2	2934	9
ILMN_1749915	-6.86839	2.26593e-11	1.1151e-09	0.27963	RSRP1	1296	1
ILMN_1752728	6.86693	2.28694e-11	1.12135e-09	0.277239	FUCA1	1784	1
ILMN_1730995	6.86652	2.29286e-11	1.12135e-09	0.160562	AFAP1L2	3699	10
ILMN_1746206	6.86649	2.29324e-11	1.12135e-09	0.274366	CEP131	3538	17
ILMN_1655844	-6.86455	2.3215e-11	1.13266e-09	0.139333	TAF1A	376	1
ILMN_3248078	-6.86423	2.32621e-11	1.13266e-09	0.482385		315
ILMN_1697975	6.85789	2.42122e-11	1.17644e-09	0.06832	PHF14	3091	7
ILMN_1689400	-6.85404	2.48079e-11	1.20093e-09	0.255635	CLK1	1444	2
ILMN_3244157	6.85396	2.48206e-11	1.20093e-09	0.180474	RPL3	37	22
ILMN_1794781	6.84736	2.58748e-11	1.24931e-09	0.205491	VAV2	4432	9
ILMN_1758323	-6.84429	2.63815e-11	1.27111e-09	0.21762	ACPP	2717	3
ILMN_2055330	6.84278	2.66325e-11	1.28053e-09	0.17196		6944
ILMN_1700546	-6.84208	2.6751e-11	1.28354e-09	0.180131		2251
ILMN_1795464	6.84064	2.69944e-11	1.29253e-09	0.170681		1328
ILMN_1729314	6.83288	2.83465e-11	1.35446e-09	0.168056		557
ILMN_2306540	6.82837	2.91618e-11	1.39053e-09	0.412064	PDE9A	1713	21
ILMN_3243644	6.82327	3.01131e-11	1.43292e-09	0.321861		368
ILMN_1747650	-6.8198	3.07763e-11	1.46146e-09	0.198163	BMP6	2604	6
ILMN_1727402	6.81	3.27306e-11	1.55107e-09	0.510244	HCLS1	1731	3
ILMN_3258424	-6.80916	3.29048e-11	1.55612e-09	0.247483		423
ILMN_1732926	6.80501	3.37734e-11	1.59392e-09	0.0750174	PVT1	153	8
ILMN_1742789	6.80468	3.38433e-11	1.59396e-09	0.364005		1655
ILMN_1774312	-6.80279	3.42465e-11	1.60966e-09	0.159274	MRPL57	2095	13
ILMN_2142117	-6.80214	3.4385e-11	1.61288e-09	0.350414		473
ILMN_1874689	-6.79685	3.55449e-11	1.66389e-09	0.314715	MIR181A2HG	2054	9
ILMN_2276290	-6.7957	3.5802e-11	1.67253e-09	0.104072		2297
ILMN_1763386	6.79501	3.59571e-11	1.67637e-09	0.242945	BID	2229	22
ILMN_1794106	6.79084	3.69098e-11	1.71731e-09	0.286231	FEZ1	971	11
ILMN_1665554	6.78721	3.77581e-11	1.75324e-09	0.0372892	ADGRA2	1653	8
ILMN_1692517	6.78579	3.80957e-11	1.76535e-09	0.332458		2432
ILMN_1655225	-6.77538	4.06604e-11	1.8776e-09	0.228174	C19orf25	1938	19
ILMN_2331266	-6.7753	4.06808e-11	1.8776e-09	0.241856	NUMB	3418	14
ILMN_1667068	6.76912	4.22836e-11	1.94767e-09	0.0628607		6966
ILMN_3241034	6.76832	4.24935e-11	1.95343e-09	0.204758		112
ILMN_1679640	-6.76607	4.30961e-11	1.97719e-09	0.174168	FXR1	2437	3
ILMN_1710495	6.76233	4.41153e-11	2.01992e-09	0.155776	PAPLN	5555	14
ILMN_1740466	-6.75448	4.63294e-11	2.11709e-09	0.240674	FAM46A	1591	6
ILMN_1676058	6.74957	4.77711e-11	2.17865e-09	0.118642	MAGOHB	2523	12
ILMN_1691930	6.74912	4.79038e-11	2.18038e-09	0.281128	CBX6	3102	22
ILMN_2277676	6.74608	4.88231e-11	2.21784e-09	0.274775	CD3EAP	991	19
ILMN_1699665	6.74233	4.99745e-11	2.26567e-09	0.408469	CLIC6	3588	21
ILMN_2351298	-6.74001	5.07035e-11	2.29421e-09	0.327498	WIPF1	3053	2
ILMN_1736729	-6.73891	5.10529e-11	2.30549e-09	0.252861	OAS2	3195	12
ILMN_2393712	6.73822	5.1273e-11	2.3109e-09	0.129778	CTTN	2646	11
ILMN_1699472	6.73254	5.3117e-11	2.38933e-09	0.207687	ST3GAL3	1506	1
ILMN_2380771	6.73016	5.3911e-11	2.42032e-09	0.318951		1233
ILMN_1678833	-6.7274	5.48427e-11	2.45369e-09	0.330416	CCR3	2246	3
ILMN_1749327	6.72733	5.48674e-11	2.45369e-09	0.222421	MAPK13	1654	6
ILMN_1736982	6.72277	5.64435e-11	2.51928e-09	0.202208		1803
ILMN_1720819	-6.71105	6.07093e-11	2.70444e-09	0.166924		251
ILMN_2115696	-6.70612	6.25923e-11	2.78294e-09	0.184067	USP42	4753	7
ILMN_1690646	-6.70498	6.3037e-11	2.79731e-09	0.134012	SATB1	2142	3
ILMN_2125010	-6.70324	6.37202e-11	2.82219e-09	0.229369	SKAP2	3487	7
ILMN_1691436	6.69645	6.64628e-11	2.93801e-09	0.174691	BLVRA	883	7
ILMN_3241985	6.69029	6.90459e-11	3.04398e-09	0.146081	EPB41L4A-A	71	5
ILMN_2104967	-6.69011	6.91244e-11	3.04398e-09	0.204848		2262
ILMN_1679041	6.6866	7.06423e-11	3.10489e-09	0.12838	SLC3A2	151	11
ILMN_1721127	-6.68493	7.13777e-11	3.13124e-09	0.193369	HIST1H3D	791	6
ILMN_2142554	6.68134	7.29796e-11	3.19542e-09	0.377655	NENF	543	1
ILMN_1680874	6.68056	7.33316e-11	3.20474e-09	0.388722	TUBB2B	1530	6
ILMN_3307868	6.67511	7.58485e-11	3.30846e-09	0.222225	CHI3L1	1507	1
ILMN_1767556	6.67475	7.60167e-11	3.30953e-09	0.208132	C10orf10	1695	10
ILMN_1804384	6.67398	7.63783e-11	3.31373e-09	0.267066		1536
ILMN_1769406	6.67393	7.6401e-11	3.31373e-09	0.174035		881
ILMN_2285817	-6.67313	7.67828e-11	3.32403e-09	0.185703	FAM89A	876	1
ILMN_1720623	-6.6688	7.88607e-11	3.40758e-09	0.25626	SYTL3	2005	6
ILMN_3228595	-6.66526	8.06057e-11	3.47015e-09	0.218745		543	1
ILMN_1763882	-6.66525	8.06102e-11	3.47015e-09	0.296125		3461
ILMN_1787275	6.6622	8.21455e-11	3.52965e-09	0.269429		3844
ILMN_2352245	-6.65854	8.40214e-11	3.60353e-09	0.240976	RASSF6	3967	4
ILMN_1666733	6.65453	8.61266e-11	3.68696e-09	0.0754363	CXCL8	868	4
ILMN_1797342	6.65395	8.64317e-11	3.69315e-09	0.169341	FNBP1	5262	9
ILMN_1681601	-6.65314	8.68652e-11	3.7048e-09	0.179448	SUCNR1	902	3
ILMN_1712023	6.65092	8.80637e-11	3.74897e-09	0.285242	SLC8A3	2518	14
ILMN_1682567	6.6504	8.83462e-11	3.75406e-09	0.18248	CCDC106	1898	19
ILMN_2139100	-6.64998	8.8572e-11	3.75673e-09	0.0736051	SHISA5	1820	3
ILMN_3243966	6.64935	8.89214e-11	3.76461e-09	0.040812	SCARNA23	75	X
ILMN_2231911	-6.64099	9.36192e-11	3.95623e-09	0.122335		821
ILMN_1695853	-6.63867	9.49655e-11	4.00577e-09	0.139834	CLK4	2086	5
ILMN_1654773	-6.62914	1.00698e-10	4.23983e-09	0.260512	CASK	2836	X
ILMN_1676361	6.62722	1.01895e-10	4.28238e-09	0.156531	ARHGAP22	2642	10
ILMN_1735058	-6.62087	1.05953e-10	4.44482e-09	0.226989	CHST12	1939	7
ILMN_1682910	-6.61261	1.11462e-10	4.66447e-09	0.174965	SLC35B3	1706	6
ILMN_2135709	-6.61242	1.11594e-10	4.66447e-09	0.192086	ERICH5	1239	8
ILMN_1797283	6.61099	1.12576e-10	4.69697e-09	0.054637	ASTN2	89	9
ILMN_3245707	-6.60921	1.13811e-10	4.73994e-09	0.362948	RIMKLB	5668	12
ILMN_1723274	6.60517	1.16668e-10	4.85016e-09	0.274818	GPR55	3742	2
ILMN_1699217	-6.59968	1.20664e-10	4.99863e-09	0.0939178		5007	1
ILMN_1808590	-6.59966	1.20674e-10	4.99863e-09	0.369933	GUCY1A3	2249	4
ILMN_1807044	6.5929	1.25777e-10	5.20068e-09	0.209428	UBAC1	1695	9
ILMN_3240150	6.59191	1.26543e-10	5.21939e-09	0.155684	SNORA75	13	2
ILMN_3246273	6.59173	1.26683e-10	5.21939e-09	0.208536		84
ILMN_1769734	-6.58621	1.31036e-10	5.3891e-09	0.239326		907
ILMN_1796497	-6.58582	1.31346e-10	5.39222e-09	0.229619	IPCEF1	6374	6
ILMN_1669210	6.58449	1.32425e-10	5.42684e-09	0.126157	RPL4	18	15
ILMN_1708890	6.582	1.34451e-10	5.50007e-09	0.165797	RASSF4	433	10
ILMN_1810274	-6.57448	1.40778e-10	5.74869e-09	0.279824	HOXB2	1233	17
ILMN_1810423	6.57361	1.4153e-10	5.76917e-09	0.140399	RPP40	1074	6
ILMN_1708328	6.56779	1.4665e-10	5.9673e-09	0.354764		4153
ILMN_3178050	6.56737	1.47024e-10	5.97197e-09	0.110281	SPECC1	2169	17
ILMN_1712936	6.56515	1.49028e-10	6.04272e-09	0.0552736		2536
ILMN_1669516	-6.56278	1.51201e-10	6.12007e-09	0.129505	ZSCAN9	1281	6
ILMN_2131177	-6.56177	1.52135e-10	6.14066e-09	0.34708	GUCY1A3	2903	4
ILMN_1714861	6.56166	1.52243e-10	6.14066e-09	0.114549		1637
ILMN_1684571	6.55918	1.54558e-10	6.22314e-09	0.7628		935
ILMN_1779071	6.55235	1.6113e-10	6.4764e-09	0.371088	FEZ1	1461	11
ILMN_1814282	6.55091	1.62554e-10	6.52226e-09	0.269279	AEN	2918	15
ILMN_2186061	6.55	1.63451e-10	6.54684e-09	0.137573	PFKFB3	4090	10
ILMN_1691508	6.54871	1.64744e-10	6.5872e-09	0.214766	PLAUR	1107	19
ILMN_2209180	-6.54305	1.70517e-10	6.8062e-09	0.137408		4110
ILMN_1803686	6.54072	1.7296e-10	6.89176e-09	0.303819	ADA	1204	20
ILMN_2093343	-6.53894	1.74835e-10	6.95444e-09	0.306068		281
ILMN_1749362	-6.53767	1.76193e-10	6.99637e-09	0.368821		3281
ILMN_1695658	-6.53684	1.77091e-10	7.01996e-09	0.100997	KIF20A	2640	5
ILMN_2326997	-6.53624	1.77734e-10	7.03331e-09	0.173886	WDR83	1027	19
ILMN_2406106	-6.5356	1.78428e-10	7.04866e-09	0.244036	CACNB2	2016	10
ILMN_1815346	6.53465	1.79465e-10	7.07749e-09	0.19597	TMEM136	694	11
ILMN_2111187	-6.5322	1.82156e-10	7.17134e-09	0.190501	ELOVL6	2950	4
ILMN_1813277	-6.52726	1.87706e-10	7.37441e-09	0.349241		1131
ILMN_2115340	-6.52704	1.87955e-10	7.37441e-09	0.301105		344
ILMN_1713679	6.52499	1.90313e-10	7.45426e-09	0.151473	MREG	863	2
ILMN_2262901	-6.52191	1.93903e-10	7.58198e-09	0.307808		2563
ILMN_1763398	6.52106	1.94913e-10	7.60854e-09	0.17172	CLEC17A	1334	19
ILMN_2103919	6.51845	1.98021e-10	7.7168e-09	0.326677	LRFN3	2385	19
ILMN_1692177	-6.51647	2.0041e-10	7.79671e-09	0.238521	TSC22D1	222	13
ILMN_2372413	6.51573	2.01312e-10	7.81857e-09	0.255343	BID	1478	22
ILMN_2415826	6.51485	2.0239e-10	7.8472e-09	0.139355	SPECC1	1869	17
ILMN_1788931	-6.51128	2.0683e-10	8.00588e-09	0.266258	DOCK8	6847	9
ILMN_3238680	-6.51098	2.07208e-10	8.00705e-09	0.236062		333
ILMN_1741356	-6.50814	2.108e-10	8.13222e-09	0.291278	PPHLN1	3209	12
ILMN_2108938	-6.50152	2.1943e-10	8.451e-09	0.0489846	FNBP4	3599	11
ILMN_1674063	-6.49876	2.23126e-10	8.56478e-09	0.2769	OAS2	3443	12
ILMN_2147435	-6.49876	2.23128e-10	8.56478e-09	0.194178	MAN2A1	4356	5
ILMN_1715404	-6.498	2.2416e-10	8.59006e-09	0.140468	GPR174	557	X
ILMN_2413808	-6.49705	2.25451e-10	8.6252e-09	0.125904	CD53	1208	1
ILMN_1727992	6.49615	2.26685e-10	8.65803e-09	0.305375	FEZ1	386	11
ILMN_2307903	6.49551	2.27565e-10	8.67724e-09	0.134343	VCAM1	2972	1
ILMN_1736190	6.49192	2.32553e-10	8.85276e-09	0.107981		4625
ILMN_1733538	6.48849	2.37437e-10	9.02377e-09	0.277816	RGS10	595	10
ILMN_1796923	6.48758	2.38744e-10	9.05851e-09	0.178243		2518	16
ILMN_1778358	-6.48659	2.40169e-10	9.09759e-09	0.13518	ATP8A1	3534	4
ILMN_2355831	6.48454	2.43172e-10	9.19317e-09	0.2209	FHL2	1802	2
ILMN_1809086	-6.48432	2.43491e-10	9.19317e-09	0.160571	XRN1	9942	3
ILMN_1725791	-6.47931	2.50984e-10	9.46056e-09	0.252897	HACD1	530	10
ILMN_1764207	-6.47208	2.62184e-10	9.86659e-09	0.108954	RPRD1A	3628	18
ILMN_1655922	-6.46309	2.76794e-10	1.03994e-08	0.261754	PPP6R2	197	22
ILMN_1664499	-6.46155	2.79372e-10	1.04792e-08	0.096726	PLEKHG7	3172	12
ILMN_2161746	6.45838	2.84753e-10	1.06637e-08	0.484291	TRIP10	1759	19
ILMN_1657446	6.45637	2.88235e-10	1.07765e-08	0.622341	NTPCR	621	1
ILMN_1671378	6.45253	2.94978e-10	1.10108e-08	0.542342		869
ILMN_3235709	-6.45	2.99503e-10	1.11616e-08	0.237708		2576
ILMN_1672097	6.44857	3.02087e-10	1.12397e-08	0.270078	CD86	20	3
ILMN_1684368	6.44737	3.04278e-10	1.13029e-08	0.21311		1643
ILMN_3243928	-6.44534	3.0801e-10	1.14231e-08	0.218276	DDX60L	6010	4
ILMN_3300313	6.44497	3.08701e-10	1.14304e-08	0.124962	P4HTM	2074	3
ILMN_1667449	6.4438	3.10888e-10	1.14929e-08	0.2378	GCSAM	2802	3
ILMN_2078697	6.44123	3.15719e-10	1.16527e-08	0.160716	ALPK1	3957	4
ILMN_2186137	6.44004	3.17987e-10	1.16942e-08	0.0969445	RRAD	1162	16
ILMN_2108735	6.43988	3.183e-10	1.16942e-08	0.171243	EEF1A2	1791	20
ILMN_2046470	-6.43985	3.18364e-10	1.16942e-08	0.406956	DAAM1	4025	14
ILMN_1714165	6.43955	3.18929e-10	1.16963e-08	0.215186	ST3GAL2	2363	16
ILMN_1697469	6.43707	3.23725e-10	1.18533e-08	0.215724	SRSF6	3623	20
ILMN_1792433	-6.43263	3.32474e-10	1.21543e-08	0.0518515		1144
ILMN_1662578	-6.43158	3.34575e-10	1.22117e-08	0.393612		1401
ILMN_1724422	-6.43037	3.37008e-10	1.22811e-08	0.221531	SELL	1895	1
ILMN_1752947	6.42839	3.41042e-10	1.24084e-08	0.289517	COPRS	578	17
ILMN_1653163	6.42763	3.42601e-10	1.24455e-08	0.144172	ZSCAN2	654	15
ILMN_1873300	-6.42301	3.52241e-10	1.277e-08	0.166092		496
ILMN_1790741	6.42282	3.52643e-10	1.277e-08	0.200652		1509
ILMN_1737308	-6.42195	3.54491e-10	1.28168e-08	0.330387		982
ILMN_1795448	-6.42155	3.55335e-10	1.28271e-08	0.1261	OR2B6	471	6
ILMN_2134974	-6.41349	3.72936e-10	1.34414e-08	0.236953	RAB38	1134	11
ILMN_1700762	6.41197	3.76346e-10	1.35432e-08	0.346486	PBX4	1155	19
ILMN_1793672	6.40703	3.87652e-10	1.39175e-08	0.162967		2992	19
ILMN_2221046	6.4069	3.87958e-10	1.39175e-08	0.521218	GM2A	1841	5
ILMN_2388466	-6.40564	3.90894e-10	1.4001e-08	0.199337	TIA1	1822	2
ILMN_3243061	6.40389	3.95006e-10	1.41264e-08	0.388899	SIGLEC14	1957	19
ILMN_1797001	-6.39729	4.10911e-10	1.46724e-08	0.20076	DDX58	4111	9
ILMN_1752299	6.39628	4.13394e-10	1.47382e-08	0.13632	SRPRB	5348	3
ILMN_1793522	6.39093	4.26839e-10	1.5194e-08	0.401658	PRKAB1	2180	12
ILMN_1782753	-6.39055	4.27798e-10	1.52047e-08	0.181442		2360	5
ILMN_1785345	6.38743	4.35859e-10	1.54673e-08	0.156364	GPR84	1181	12
ILMN_2396546	6.38713	4.36635e-10	1.5471e-08	0.0984094	IGSF3	6401	1
ILMN_1744614	6.38543	4.41083e-10	1.56046e-08	0.106212	PLEKHG6	2531	12
ILMN_1736021	-6.38409	4.44638e-10	1.57062e-08	0.233084	PRPF4B	5603	6
ILMN_2196347	-6.38027	4.54895e-10	1.60439e-08	0.196442	CDKN1B	2210	12
ILMN_1769412	6.37971	4.56415e-10	1.60729e-08	0.231847	RAPGEF1	6014	9
ILMN_1817255	-6.3686	4.87686e-10	1.71479e-08	0.14933	CCNT1	3800	12
ILMN_1682038	-6.35938	5.15213e-10	1.80841e-08	-0.0523012	TAF1D	14	11
ILMN_1714577	6.35916	5.15881e-10	1.80841e-08	0.428231	OGDHL	3356	10
ILMN_1766169	6.35802	5.19409e-10	1.81801e-08	0.235061	BCAT1	7557	12
ILMN_1676955	6.35743	5.2123e-10	1.82161e-08	0.20808	TYK2	4129	19
ILMN_1684628	6.35444	5.30594e-10	1.85153e-08	0.295661	ZFP90	4268	16
ILMN_1668411	6.3536	5.33243e-10	1.85796e-08	0.208538	FHL2	1030	2
ILMN_2367883	6.35136	5.40403e-10	1.88006e-08	0.204851	GEM	1125	8
ILMN_1690122	-6.34949	5.4645e-10	1.89823e-08	0.149385	CRKL	4943	22
ILMN_3238078	6.34794	5.51497e-10	1.91288e-08	0.0566357	RPL27A	2	11
ILMN_3309468	-6.34735	5.53448e-10	1.91676e-08	0.12744	FOXD2-AS1	2361	1
ILMN_1761242	6.34555	5.59385e-10	1.93441e-08	0.13666	COMMD1	599	2
ILMN_1700811	-6.34198	5.71376e-10	1.97292e-08	0.039964	UBFD1	1148	16
ILMN_1847308	6.33641	5.90606e-10	2.03626e-08	0.192095	FAM168A	6618	11
ILMN_1751956	-6.33396	5.99251e-10	2.06298e-08	0.317253		335
ILMN_1683950	6.3308	6.10575e-10	2.09883e-08	0.0821095	SNX11	2280	17
ILMN_1814106	6.32545	6.30254e-10	2.16324e-08	0.0924495		692
ILMN_1795715	-6.32059	6.48685e-10	2.22319e-08	0.341497	DPYD	3794	1
ILMN_1791702	6.32002	6.50886e-10	2.22742e-08	0.294991	SMARCA2	5634	9
ILMN_3224939	6.3101	6.90248e-10	2.35862e-08	0.149018	MUC19	2004	12
ILMN_1711276	-6.30739	7.01393e-10	2.39315e-08	0.507899		134
ILMN_1711543	6.30006	7.32474e-10	2.49551e-08	0.18815	RIOX1	2346	14
ILMN_1675616	6.29882	7.37846e-10	2.51009e-08	0.347654	C12orf54	516	12
ILMN_1664466	-6.29408	7.58787e-10	2.57752e-08	0.303575	KLHL9	4016	9
ILMN_3229324	6.29038	7.75547e-10	2.63058e-08	0.173949	SGK1	1672	6
ILMN_1774261	6.28928	7.806e-10	2.64382e-08	0.171552	DOK4	2425	16
ILMN_2211739	-6.28866	7.83459e-10	2.64961e-08	0.184155	SLC15A2	2444	3
ILMN_2345015	6.27968	8.26103e-10	2.78973e-08	0.193235	PTGES2	1493	9
ILMN_1748908	-6.27815	8.3358e-10	2.81086e-08	0.170068	PROSC	2588	8
ILMN_1783707	6.27763	8.36128e-10	2.81427e-08	0.116903		2135
ILMN_1806306	6.27745	8.37036e-10	2.81427e-08	0.0848826	SV2B	4896	15
ILMN_1753404	6.27638	8.42324e-10	2.82792e-08	0.279278	LRRC23	1164	12
ILMN_2070044	-6.27596	8.44388e-10	2.83073e-08	0.236582		1201
ILMN_1735955	6.27426	8.52897e-10	2.8551e-08	0.0473299		283
ILMN_1810127	6.27333	8.57569e-10	2.86657e-08	0.0665431		388
ILMN_1687896	-6.2715	8.66894e-10	2.89354e-08	0.172589		2702
ILMN_1754643	-6.27031	8.72962e-10	2.90624e-08	0.028567		5122
ILMN_2342033	6.27026	8.73222e-10	2.90624e-08	0.384545	F11R	3695	1
ILMN_1657744	-6.26995	8.74832e-10	2.90739e-08	0.222208	MPI	2467	15
ILMN_1745242	-6.26958	8.76706e-10	2.90943e-08	0.190547	PLSCR1	422	3
ILMN_1803423	-6.26501	9.00619e-10	2.98448e-08	0.288931	ARHGEF6	5105	X
ILMN_1839481	-6.25471	9.56865e-10	3.16631e-08	-0.0287841	SMAD9	1991	13
ILMN_1683670	-6.24704	1.00094e-09	3.30742e-08	0.237979		3498
ILMN_3241993	6.24639	1.0048e-09	3.31541e-08	0.130573		24
ILMN_1845037	-6.24377	1.02033e-09	3.36182e-08	0.198669		1622
ILMN_1651752	-6.24315	1.02407e-09	3.36935e-08	0.369912	CXorf21	1247	X
ILMN_1834842	-6.24196	1.03121e-09	3.388e-08	0.0191117		390
ILMN_1699249	6.23809	1.05489e-09	3.46084e-08	0.171998	ZNF649	2922	19
ILMN_1723353	-6.2371	1.06104e-09	3.47607e-08	0.214495	FAM122A	2960	9
ILMN_1745021	6.23206	1.09285e-09	3.57519e-08	0.13154	SLC30A1	1487	1
ILMN_1678766	-6.23161	1.09577e-09	3.57967e-08	0.246692	DYNLT1	315	6
ILMN_1778337	-6.2304	1.10355e-09	3.59997e-08	0.241627		2552
ILMN_1674231	6.22791	1.11974e-09	3.64761e-08	0.135605		2100
ILMN_3240375	-6.22102	1.16586e-09	3.7925e-08	0.0793892		92
ILMN_2075847	-6.22026	1.17104e-09	3.80397e-08	0.0274274	ZC3H10	1945	12
ILMN_3239108	6.21885	1.18075e-09	3.83011e-08	0.0597969	RPL27A	6	11
ILMN_1674243	6.21794	1.18705e-09	3.84513e-08	0.160847		4951
ILMN_1683927	-6.21681	1.1949e-09	3.86514e-08	0.286132	ITGAE	3576	17
ILMN_1673352	-6.21514	1.20665e-09	3.89766e-08	0.319167	IFITM2	543	11
ILMN_1657624	6.2132	1.22035e-09	3.93639e-08	0.14839	NSFL1C	3350	20
ILMN_1810725	6.21236	1.22636e-09	3.95024e-08	0.260559	FAM129A	3568	1
ILMN_1695435	-6.21205	1.22864e-09	3.95207e-08	0.278417		713
ILMN_2323526	-6.20781	1.25945e-09	4.04553e-08	0.219809	WAC	2213	10
ILMN_2147424	6.19655	1.34501e-09	4.31433e-08	0.595685	SERPINB10	905	18
ILMN_2052208	6.19474	1.35923e-09	4.35388e-08	0.215082	GADD45A	920	1
ILMN_1702247	-6.19197	1.38136e-09	4.41861e-08	0.188041	CCNDBP1	1128	15
ILMN_1839750	-6.19038	1.39427e-09	4.4479e-08	0.16118		105	6
ILMN_3305938	6.19036	1.39437e-09	4.4479e-08	0.18171		1808
ILMN_1731745	6.1896	1.4006e-09	4.46157e-08	0.273873	NINJ2	937	12
ILMN_1701466	6.18482	1.44011e-09	4.58111e-08	0.210194	PEX16	1218	11
ILMN_2403906	-6.18309	1.45469e-09	4.62109e-08	0.241095	ARFIP1	2474	4
ILMN_1749799	-6.18013	1.47999e-09	4.69497e-08	0.286136		66
ILMN_2112256	6.1799	1.48202e-09	4.69497e-08	0.177939	TNFRSF4	999	1
ILMN_1789171	6.17684	1.50859e-09	4.77257e-08	0.180355	EEF2K	5172	16
ILMN_1800425	6.17446	1.52965e-09	4.83256e-08	0.219632		4344
ILMN_1679949	6.17084	1.56216e-09	4.92851e-08	0.407982		3372
ILMN_1812934	6.16773	1.59069e-09	5.01165e-08	0.0925109	DIDO1	1859	20
ILMN_2353633	6.16685	1.59884e-09	5.03044e-08	0.65298	ZNF333	6018	19
ILMN_1702487	6.16646	1.60244e-09	5.03141e-08	0.179101		2037
ILMN_1660200	6.16618	1.60504e-09	5.03141e-08	0.188131		1
ILMN_1796830	6.16611	1.6057e-09	5.03141e-08	0.0887803	UBE2L3	396	22
ILMN_1731518	6.16412	1.62436e-09	5.08297e-08	0.289972	PLD6	2230	17
ILMN_2382990	6.16373	1.62805e-09	5.08759e-08	0.206757	HK1	3761	10
ILMN_2078599	6.16033	1.66056e-09	5.18216e-08	0.205906	ACP5	1124	19
ILMN_1708922	6.15457	1.71702e-09	5.35111e-08	0.0865074	ABL1	351	9
ILMN_3260345	6.14936	1.76968e-09	5.50776e-08	0.127305	AGFG1	8306	2
ILMN_1797375	-6.14841	1.77944e-09	5.53068e-08	0.260574	KLF12	1068	13
ILMN_1674228	-6.1458	1.80653e-09	5.6073e-08	0.097392		62
ILMN_1702396	6.14278	1.83845e-09	5.69869e-08	0.343313	PACSIN2	3033	22
ILMN_1785175	6.14243	1.84214e-09	5.70247e-08	0.309404	SWAP70	3445	11
ILMN_2388112	6.14057	1.86209e-09	5.75647e-08	0.0955752		6458
ILMN_3250268	-6.14031	1.86497e-09	5.75765e-08	0.28305		145
ILMN_3244646	6.1395	1.8737e-09	5.77205e-08	0.228509		78
ILMN_1705442	6.13941	1.87465e-09	5.77205e-08	0.37967	CMTM3	1711	16
ILMN_3235188	6.13884	1.88085e-09	5.78342e-08	0.306181		4	1
ILMN_1766269	-6.13709	1.90004e-09	5.83464e-08	0.0098045	HM13	1472	20
ILMN_1655549	6.13261	1.94996e-09	5.97997e-08	0.188514		2711
ILMN_2059549	-6.13112	1.96683e-09	6.02368e-08	0.246707	SYK	2241	9
ILMN_1726199	-6.13075	1.97101e-09	6.02846e-08	0.0722674	ZNF594	4587	17
ILMN_1784540	-6.1244	2.0447e-09	6.24555e-08	0.0896483	KBTBD2	3468	7
ILMN_1699585	-6.12044	2.09207e-09	6.37561e-08	0.219748	BHLHE22	3075	8
ILMN_1811181	-6.12038	2.09281e-09	6.37561e-08	0.515487		547
ILMN_1748625	6.11241	2.19128e-09	6.66676e-08	0.207983	TCEAL4	939	X
ILMN_1662843	-6.11115	2.2073e-09	6.70664e-08	0.120691	CD53	1206	1
ILMN_1710092	6.10982	2.22433e-09	6.74947e-08	0.127155	ZBTB46	4218	20
ILMN_1713918	6.10917	2.23258e-09	6.7656e-08	0.343891	CYTH3	3875	7
ILMN_1736806	6.10584	2.27598e-09	6.88806e-08	0.335885	PAG1	5980	8
ILMN_2363250	6.10468	2.29116e-09	6.9249e-08	0.0742318	BCL2	998	18
ILMN_1803824	6.10169	2.33095e-09	7.03592e-08	0.249015	ZDHHC9	2842	X
ILMN_1665964	6.09941	2.36177e-09	7.11964e-08	0.239527	GAB2	5592	11
ILMN_1743911	6.09421	2.43367e-09	7.32635e-08	0.1807	SLC25A39	1420	17
ILMN_1836469	-6.09381	2.43926e-09	7.32635e-08	0.234467	NDUFB2	2065	7
ILMN_1792587	-6.09376	2.43989e-09	7.32635e-08	0.099324	VPS4B	2832	18
ILMN_2157099	6.09341	2.44482e-09	7.33159e-08	0.227574		1182
ILMN_2213297	-6.09187	2.46665e-09	7.38744e-08	0.178081	C11orf54	1961	11
ILMN_1751464	6.09083	2.48135e-09	7.42181e-08	0.0957407	TNFSF9	1202	19
ILMN_1712959	6.08263	2.60125e-09	7.77036e-08	0.188158	DUSP2	1440	2
ILMN_2350122	-6.07923	2.65259e-09	7.91345e-08	0.251293		2660
ILMN_2346836	-6.07872	2.66039e-09	7.92644e-08	0.0551627	HSF5	3866	17
ILMN_1720857	-6.07461	2.72384e-09	8.09975e-08	0.366904		343
ILMN_1652185	6.0745	2.72559e-09	8.09975e-08	0.126725	IL4R	3461	16
ILMN_2048793	-6.07235	2.75937e-09	8.18956e-08	0.266386		3867
ILMN_1738796	6.07213	2.76293e-09	8.18958e-08	0.11324		1595
ILMN_1726565	6.07152	2.77258e-09	8.20763e-08	0.339935		3817
ILMN_1733221	-6.06936	2.80712e-09	8.28888e-08	0.0312182	SEMA4D	1514	9
ILMN_1677092	6.06936	2.80723e-09	8.28888e-08	0.179916	GEM	986	8
ILMN_2145423	-6.0683	2.82429e-09	8.32859e-08	0.0126211	DET1	1938	15
ILMN_1667374	-6.06633	2.85636e-09	8.41237e-08	0.329077	L3HYPDH	855	14
ILMN_1729112	-6.06168	2.93365e-09	8.62377e-08	0.451282		989
ILMN_1774604	6.06156	2.93562e-09	8.62377e-08	0.158897	PNKD	2541	2
ILMN_1772645	6.05891	2.98047e-09	8.74437e-08	0.203475		2000
ILMN_2054510	-6.05795	2.99698e-09	8.78162e-08	0.195364	BCAS3	3172	17
ILMN_2185984	-6.05438	3.05882e-09	8.95143e-08	0.180882	SASH1	7271	6
ILMN_1703538	6.05336	3.07673e-09	8.99241e-08	0.264191		43
ILMN_1766851	-6.05199	3.10108e-09	9.0521e-08	0.108275	TMEM126B	658	11
ILMN_1658290	6.05125	3.11414e-09	9.07514e-08	0.251192	METTL22	1217	16
ILMN_1757631	-6.0511	3.11686e-09	9.07514e-08	0.31453	DBNDD1	1932	16
ILMN_3235928	-6.04808	3.17121e-09	9.22174e-08	0.419679	CYTIP	1854	2
ILMN_2209515	6.04784	3.17549e-09	9.22253e-08	0.10211	NOP56	21	20
ILMN_2058251	-6.04681	3.19435e-09	9.26562e-08	0.163	VIM	1370	10
ILMN_1794260	6.04586	3.21172e-09	9.30428e-08	0.138777	KDM2B	5097	12
ILMN_1682404	6.04537	3.22081e-09	9.31891e-08	0.218117		1727
ILMN_1705049	6.04485	3.23038e-09	9.33487e-08	0.252633	TMEM67	1947	8
ILMN_1776076	6.04025	3.31646e-09	9.5716e-08	0.0958697	POFUT1	4373	20
ILMN_1668960	-6.03803	3.3588e-09	9.68167e-08	0.273308	MID1IP1	1858	X
ILMN_3238955	6.03438	3.42955e-09	9.87324e-08	0.0572536	EIF4A1	80	17
ILMN_1654262	6.03374	3.44207e-09	9.89692e-08	0.142135	ZMAT3	1636	3
ILMN_1730670	6.03319	3.45285e-09	9.91553e-08	0.0573105	FSTL3	2253	19
ILMN_3296705	-6.02874	3.54178e-09	1.01583e-07	0.140282	C1RL-AS1	239	12
ILMN_1735474	6.02757	3.56538e-09	1.02132e-07	0.17021	R3HCC1	1496	8
ILMN_1674334	-6.02674	3.5824e-09	1.02492e-07	0.123135		307
ILMN_1797728	-6.02166	3.68764e-09	1.05372e-07	0.129947		3343
ILMN_2377240	6.01933	3.73697e-09	1.0665e-07	0.156741		1530
ILMN_1746408	-6.01705	3.78599e-09	1.07915e-07	0.234497	MIDN	3608	19
ILMN_1706687	-6.01336	3.86633e-09	1.10069e-07	0.140594		3159
ILMN_1699091	6.01119	3.91434e-09	1.11298e-07	0.127205	GPATCH2L	2065	14
ILMN_3235003	-6.01048	3.93016e-09	1.1161e-07	0.357968		403
ILMN_2406169	6.01	3.94098e-09	1.11779e-07	0.213857	PKIG	426	20
ILMN_3246330	6.00871	3.9701e-09	1.12467e-07	0.283528		1107
ILMN_2366714	-6.00712	4.00624e-09	1.13351e-07	0.234347	UQCR10	440	22
ILMN_1675258	-6.00526	4.04869e-09	1.14412e-07	0.558045		2048
ILMN_1758529	-6.00471	4.06135e-09	1.14629e-07	0.286292	P2RX1	2679	17
ILMN_1762003	-5.99951	4.18324e-09	1.17924e-07	0.184626	SEC62	6299	3
ILMN_1694075	5.99899	4.19584e-09	1.18135e-07	0.23349		659
ILMN_1755235	5.99826	4.21321e-09	1.18479e-07	0.149731	XPO6	4171	16
ILMN_2125374	5.99543	4.28156e-09	1.20254e-07	0.170884	CMAS	1302	12
ILMN_1672605	-5.99334	4.33253e-09	1.21538e-07	0.252906	MTURN	5738	7
ILMN_1752591	-5.99239	4.35614e-09	1.22051e-07	0.0451503	LEPROTL1	2436	8
ILMN_1793859	-5.99208	4.36375e-09	1.22116e-07	0.2761	ALDH2	2003	12
ILMN_1705302	-5.98742	4.48081e-09	1.2524e-07	0.267289	FCGRT	1243	19
ILMN_1674399	-5.98663	4.50086e-09	1.25648e-07	0.268952	ZNF143	2066	11
ILMN_1900661	-5.98543	4.53152e-09	1.2635e-07	0.0884727		1020
ILMN_3249538	5.98419	4.56372e-09	1.27094e-07	0.130336		7
ILMN_1738816	-5.98373	4.57554e-09	1.2727e-07	0.21699	FOXO1	5387	13
ILMN_1716086	-5.98228	4.61326e-09	1.28164e-07	0.266312	WDR33	659	2
ILMN_1666376	-5.98178	4.62633e-09	1.28372e-07	0.199032	TRIM56	3115	7
ILMN_1769191	-5.98109	4.64448e-09	1.28721e-07	0.18565	GNAS	2163	20
ILMN_1756501	-5.97861	4.71044e-09	1.30392e-07	0.187825	ST6GAL1	3833	3
ILMN_2402363	5.97754	4.7391e-09	1.31028e-07	0.108797		1440
ILMN_2350114	-5.97677	4.7597e-09	1.3144e-07	0.171847	TRIM13	6190	13
ILMN_1655191	5.97641	4.76948e-09	1.31552e-07	0.242567	CASZ1	4325	1
ILMN_1718334	5.97497	4.80855e-09	1.32471e-07	0.361218	ITPA	995	20
ILMN_2183784	5.97414	4.83108e-09	1.32932e-07	0.423109	TTC12	2049	11
ILMN_1773363	5.97347	4.84941e-09	1.33278e-07	0.178396	CIITA	4544	16
ILMN_3249618	-5.97066	4.92736e-09	1.35259e-07	0.215108		156
ILMN_3246247	5.97037	4.93536e-09	1.35317e-07	0.431005		1887
ILMN_1667839	-5.96855	4.98653e-09	1.36557e-07	0.268754		3222
ILMN_2374352	-5.96526	5.08034e-09	1.38961e-07	0.365789	DBNDD1	2078	16
ILMN_1733390	5.96389	5.1198e-09	1.39874e-07	0.205183	LARP1B	2614	4
ILMN_1660451	-5.96126	5.1965e-09	1.41802e-07	0.242082	STARD13	778	13
ILMN_3300353	-5.95875	5.27085e-09	1.4366e-07	0.156087	ISPD	1245	7
ILMN_2133534	-5.95771	5.30201e-09	1.44339e-07	0.452691		524
ILMN_3236049	5.95705	5.32178e-09	1.44706e-07	0.130861	ZFAS1	7	20
ILMN_1721842	5.95397	5.41522e-09	1.47073e-07	0.450496	RYBP	2045	3
ILMN_1654823	5.95299	5.44527e-09	1.47715e-07	0.237548		226
ILMN_1745034	5.95226	5.46782e-09	1.48152e-07	0.105225	SLC11A2	3987	12
ILMN_1712095	-5.95074	5.5149e-09	1.49252e-07	0.18184	FOXO4	3219	X
ILMN_1673024	-5.94967	5.54834e-09	1.49981e-07	0.0936404	RBM15B	6141	3
ILMN_1761829	5.94549	5.6809e-09	1.53384e-07	0.14195	HK1	67	10
ILMN_1790962	5.94223	5.78621e-09	1.56045e-07	0.338995	RINL	1692	19
ILMN_1695829	5.94045	5.84454e-09	1.57433e-07	0.195852	TTYH2	3118	17
ILMN_3299702	5.93835	5.91422e-09	1.59124e-07	0.151082	MUC19	1534	12
ILMN_1672417	-5.93529	6.01723e-09	1.61707e-07	0.19699	PTPRCAP	783	11
ILMN_1717056	-5.93471	6.03688e-09	1.62046e-07	0.209613	TXNRD1	3392	12
ILMN_1738383	5.93355	6.07649e-09	1.62919e-07	0.242187	EEF2	3005	19
ILMN_1803392	5.93201	6.12948e-09	1.64149e-07	0.240921	TAX1BP3	1071	17
ILMN_1795678	5.92735	6.29243e-09	1.68317e-07	0.244699	POLR3C	1703	1
ILMN_1687315	5.92185	6.49019e-09	1.73406e-07	0.23236	RXRA	5207	9
ILMN_1703650	5.92059	6.53655e-09	1.74442e-07	0.0686624	TNIP1	3051	5
ILMN_3236653	5.92025	6.54887e-09	1.74568e-07	0.197792		79
ILMN_1659257	5.91654	6.68688e-09	1.78041e-07	0.167223	TNFRSF8	2035	1
ILMN_1796762	5.91606	6.70518e-09	1.78322e-07	0.220492	CCDC102A	2215	16
ILMN_1746578	5.91579	6.71537e-09	1.78387e-07	0.240356	SLC23A2	6506	20
ILMN_1745623	-5.91447	6.76523e-09	1.79505e-07	0.543315		1718	11
ILMN_1709937	5.91382	6.79006e-09	1.79956e-07	0.252126	KCNN4	1806	19
ILMN_3239621	-5.91268	6.83373e-09	1.80905e-07	0.203184		348
ILMN_1698252	-5.9121	6.85604e-09	1.81288e-07	0.0783598	FANCB	2501	X
ILMN_1659156	5.91151	6.87888e-09	1.81683e-07	0.235659	ANKRD16	1022	10
ILMN_2094416	-5.91084	6.90478e-09	1.82158e-07	0.510517		424
ILMN_1729487	-5.90795	7.0175e-09	1.8492e-07	0.247475	GMPR	1138	6
ILMN_1701686	5.90696	7.0569e-09	1.85746e-07	0.511638		20
ILMN_3237376	5.90639	7.07932e-09	1.86075e-07	0.0870808	GRAMD1B	2528	11
ILMN_2092850	-5.90624	7.08558e-09	1.86075e-07	0.264344	HPSE	1379	4
ILMN_1802708	-5.90276	7.22496e-09	1.89458e-07	0.187683	BTN3A1	3202	6
ILMN_1792389	-5.90262	7.23083e-09	1.89458e-07	0.18676	RNF165	4737	18
ILMN_3202653	-5.90161	7.27188e-09	1.90317e-07	0.244951		312
ILMN_1782444	-5.89963	7.35318e-09	1.92077e-07	0.276409	YIPF4	972	2
ILMN_1740185	5.89956	7.35583e-09	1.92077e-07	0.189579	TPMT	3040	6
ILMN_1681641	-5.89116	7.71085e-09	2.01119e-07	0.320639	DLEU1	534	13
ILMN_3236358	5.89008	7.75736e-09	2.02104e-07	0.157967	NOP14-AS1	2588	4
ILMN_2375319	-5.88949	7.78316e-09	2.02547e-07	0.198817		2211
ILMN_1767523	5.88494	7.98384e-09	2.07535e-07	0.25131	IL17RB	1535	3
ILMN_1751338	-5.88219	8.10807e-09	2.10527e-07	0.221502	NUP133	3813	1
ILMN_1716583	-5.87918	8.24571e-09	2.13859e-07	0.292737	NME7	1288	1
ILMN_2114568	-5.87832	8.28518e-09	2.14641e-07	0.215758		2153
ILMN_1809488	-5.8724	8.56412e-09	2.21618e-07	0.13875		444
ILMN_1765417	5.87067	8.64751e-09	2.23525e-07	0.173305	RBBP9	2384	20
ILMN_1747589	-5.86985	8.68685e-09	2.24262e-07	0.297103	HIST2H2AB	2	1
ILMN_1734346	5.86967	8.69549e-09	2.24262e-07	0.0404688	IZUMO4	697	19
ILMN_1808226	5.86603	8.87429e-09	2.28617e-07	0.233105	RGS16	2020	1
ILMN_1668924	5.86564	8.89384e-09	2.28865e-07	0.163644	BEGAIN	2406	14
ILMN_2115005	-5.86529	8.91084e-09	2.29046e-07	0.601866	FGD2	2993	6
ILMN_2198393	5.86321	9.01533e-09	2.31474e-07	0.144312		1283
ILMN_1659766	5.85919	9.2198e-09	2.362e-07	0.169349	BAG3	2278	10
ILMN_1673757	5.85918	9.21991e-09	2.362e-07	0.123235	CASP8	825	2
ILMN_2383349	5.85526	9.424e-09	2.4116e-07	0.272977	STEAP3	3720	2
ILMN_1804051	5.85427	9.47603e-09	2.42162e-07	0.25159	SNX8	1274	7
ILMN_3241139	5.85412	9.48419e-09	2.42162e-07	0.105175	NOP56	1	20
ILMN_1733627	5.85355	9.51422e-09	2.4266e-07	0.150605	NEDD4L	4518	18
ILMN_1793476	5.84993	9.70808e-09	2.47331e-07	0.247879	PRKCDBP	801	11
ILMN_1773963	5.84624	9.90971e-09	2.52189e-07	0.191491	GNA15	1871	19
ILMN_1777499	5.84499	9.97878e-09	2.53666e-07	0.109742		2741
ILMN_1792168	5.84381	1.00448e-08	2.55062e-07	0.227758	GALE	1431	1
ILMN_2312606	5.84043	1.02351e-08	2.59607e-07	0.893572	IRF5	2743	7
ILMN_1651429	5.83849	1.03464e-08	2.62143e-07	0.306445	SELENOM	572	22
ILMN_3244461	-5.83746	1.04057e-08	2.63356e-07	0.291949	CARMIL1	4996	6
ILMN_2131392	5.83571	1.05075e-08	2.6564e-07	0.167398	WDR70	1861	5
ILMN_2216582	-5.83504	1.0547e-08	2.66346e-07	0.253474		1442
ILMN_1788203	-5.8306	1.08103e-08	2.72698e-07	0.284559	HEY1	2101	8
ILMN_1773352	5.82932	1.08875e-08	2.74343e-07	0.168375		377
ILMN_2384496	-5.82797	1.09693e-08	2.76102e-07	0.286441	ST6GAL1	3710	3
ILMN_2232712	-5.82508	1.11469e-08	2.80266e-07	0.0665997	MYO10	7672	5
ILMN_1683774	5.82124	1.13873e-08	2.85999e-07	0.290185	IL2RA	1451	10
ILMN_3253787	-5.81846	1.15637e-08	2.90113e-07	0.223035		2170
ILMN_1847494	-5.81801	1.15927e-08	2.90524e-07	0.100462	SLC16A7	355	12
ILMN_3303673	-5.81778	1.16079e-08	2.90588e-07	0.219938	UMAD1	866	7
ILMN_3310491	5.81638	1.16982e-08	2.92409e-07	0.163127		1
ILMN_1671452	-5.81626	1.1706e-08	2.92409e-07	0.23833	MRPL44	1011	2
ILMN_3242164	5.81375	1.18702e-08	2.96188e-07	0.0463635		12
ILMN_2064606	-5.81293	1.19239e-08	2.97206e-07	0.103196		5486
ILMN_1800447	-5.81224	1.19696e-08	2.98024e-07	0.302982	PHKB	3536	16
ILMN_2054019	-5.80961	1.21454e-08	3.02075e-07	0.0707122	ISG15	392	1
ILMN_1784655	5.80924	1.21704e-08	3.0237e-07	0.136438	TLCD1	769	17
ILMN_1789502	-5.80527	1.2441e-08	3.08758e-07	0.207693	GPC4	3282	X
ILMN_1758474	5.80473	1.24785e-08	3.09358e-07	0.244077		1421
ILMN_1670975	-5.80167	1.26915e-08	3.143e-07	0.158718	ERICH5	745	8
ILMN_1798926	5.79952	1.28433e-08	3.17716e-07	0.268119	SOCS2	1554	12
ILMN_1696450	5.79901	1.28798e-08	3.18276e-07	0.23835	KLK1	821	19
ILMN_2129388	5.79734	1.29995e-08	3.20786e-07	0.278009	CCSER2	6910	10
ILMN_1777049	-5.7972	1.30092e-08	3.20786e-07	0.19585		4915
ILMN_1666690	-5.79689	1.30317e-08	3.20999e-07	0.127055		2605
ILMN_1707945	-5.79509	1.31615e-08	3.23849e-07	0.197156	HELB	2969	12
ILMN_2098325	5.79441	1.32117e-08	3.24737e-07	0.111051		2463
ILMN_1700695	-5.79343	1.32829e-08	3.26139e-07	0.206392	SLC44A1	4343	9
ILMN_1723684	5.79064	1.349e-08	3.30871e-07	0.248405	ACKR1	995	1
ILMN_1798602	-5.78984	1.35493e-08	3.31972e-07	0.152058	PCF11	5382	11
ILMN_1814787	5.78677	1.3781e-08	3.37291e-07	0.251255	ICA1	1545	7
ILMN_3248811	5.78416	1.39812e-08	3.41827e-07	0.131783	RPL21	14	13
ILMN_1746986	-5.78386	1.40043e-08	3.42029e-07	0.0429973		2695	19
ILMN_1781045	-5.78269	1.40953e-08	3.43887e-07	0.24833	FXYD2	527	11
ILMN_1741985	-5.77951	1.43449e-08	3.49606e-07	0.213958	BBS10	2496	12
ILMN_2203807	-5.77592	1.46319e-08	3.56223e-07	0.456584		2399
ILMN_1775304	-5.77326	1.4848e-08	3.61102e-07	0.00278328		1788
ILMN_3246708	5.77188	1.49607e-08	3.63459e-07	0.11101	SNORA5C	88	7
ILMN_1656415	-5.77071	1.50577e-08	3.65432e-07	0.208772	CDKN2C	288	1
ILMN_1657708	5.77012	1.51071e-08	3.66245e-07	0.204561	MGLL	4233	3
ILMN_2147517	5.76928	1.51768e-08	3.67546e-07	0.189727		620
ILMN_2188333	-5.76809	1.52769e-08	3.69583e-07	0.14387	CD69	1301	12
ILMN_1660817	5.76777	1.53037e-08	3.69607e-07	0.146758	DDB2	1436	11
ILMN_3182069	5.76769	1.531e-08	3.69607e-07	0.257217		1126
ILMN_3236220	5.76638	1.5421e-08	3.71895e-07	0.276377	LPAR2	1529	19
ILMN_1679133	-5.76562	1.5486e-08	3.73074e-07	0.483085	SERPINB1	912	6
ILMN_1714602	5.76334	1.56814e-08	3.77387e-07	0.19719	CD86	2617	3
ILMN_1740265	5.76221	1.57798e-08	3.79359e-07	0.197648	ACOT7	1563	1
ILMN_1736730	-5.76068	1.59127e-08	3.82153e-07	0.337408	CARMIL1	4638	6
ILMN_1666206	-5.7584	1.61137e-08	3.86578e-07	0.20302	GSDMB	1387	17
ILMN_1843932	-5.75543	1.6379e-08	3.92533e-07	0.189212	SAP30L	3218	5
ILMN_1726659	5.75472	1.64433e-08	3.93665e-07	0.0945864	THOP1	2320	19
ILMN_1672278	5.74931	1.69392e-08	4.05115e-07	0.169095	CXCL16	107	17
ILMN_1741736	5.74579	1.72704e-08	4.1261e-07	0.116305	DDX28	2585	16
ILMN_1707199	-5.74515	1.7331e-08	4.13628e-07	0.145748	WDR20	2338	14
ILMN_1804090	5.74416	1.74258e-08	4.15459e-07	0.131275	SLC25A10	1825	17
ILMN_1712673	-5.74254	1.75806e-08	4.18717e-07	0.186596	SASH1	7158	6
ILMN_2049184	5.74175	1.76572e-08	4.20106e-07	0.321473	DNASE1L3	1263	3
ILMN_1807455	5.74029	1.77996e-08	4.23057e-07	0.161011	DHRS7	967	14
ILMN_1730612	5.73917	1.79088e-08	4.25214e-07	0.410462	SYS1-DBNDD	1013	20
ILMN_1716272	-5.73896	1.79296e-08	4.25268e-07	0.17104	KBTBD8	4466	3
ILMN_2157020	5.73833	1.79919e-08	4.26308e-07	0.140555		2
ILMN_1687825	5.73796	1.80288e-08	4.26742e-07	0.365268	CD226	2109	18
ILMN_1831106	5.73714	1.81096e-08	4.28216e-07	0.257745	SMUG1	1307	12
ILMN_1700627	-5.73438	1.83858e-08	4.34301e-07	0.0440594		903
ILMN_1711699	-5.73208	1.8619e-08	4.39358e-07	0.261379		971
ILMN_1737025	5.72979	1.8854e-08	4.4445e-07	0.175193	PLCL2	3798	3
ILMN_1726698	-5.72654	1.9193e-08	4.51977e-07	0.0957211	PSME1	858	14
ILMN_1741440	-5.72626	1.92227e-08	4.52101e-07	0.358891	SLC35A1	1601	6
ILMN_3235185	5.72612	1.92375e-08	4.52101e-07	0.165907	SNRNP200	7088	2
ILMN_1721559	5.72058	1.983e-08	4.65549e-07	0.126097	FABP6	234	5
ILMN_1678678	5.71756	2.01602e-08	4.72821e-07	0.23568	TRAPPC4	1936	11
ILMN_1788283	5.71604	2.0328e-08	4.76271e-07	0.376121		1424
ILMN_1666845	5.71585	2.03494e-08	4.76287e-07	0.10621		1434
ILMN_1737157	5.7146	2.04891e-08	4.79071e-07	0.260903	GRAMD1A	2556	19
ILMN_2319000	5.71232	2.07462e-08	4.8459e-07	0.29885	MATK	1853	19
ILMN_2204754	-5.70869	2.11617e-08	4.93795e-07	0.266499	TMX4	2068	20
ILMN_1784753	-5.70806	2.12344e-08	4.9499e-07	0.227237	PAIP2	1070	5
ILMN_1703314	5.70363	2.17541e-08	5.06591e-07	0.211539	KLHL36	2013	16
ILMN_1686478	-5.7031	2.18169e-08	5.07268e-07	0.118471	HIST1H2AG	1396	6
ILMN_1809566	-5.70298	2.18315e-08	5.07268e-07	0.282111	ZSCAN16	1000	6
ILMN_1659786	-5.70283	2.18492e-08	5.07268e-07	0.16063	TRMT13	2624	1
ILMN_1696591	-5.7008	2.20929e-08	5.12409e-07	0.175269	RB1	3249	13
ILMN_1791483	-5.70013	2.21737e-08	5.13764e-07	0.180788	PDE4D	5743	5
ILMN_1655068	5.69924	2.22812e-08	5.15737e-07	0.104544	TOM1L2	2422	17
ILMN_1729175	-5.69549	2.27414e-08	5.2586e-07	0.359899	FBXO3	1219	11
ILMN_1771403	-5.69207	2.31705e-08	5.35244e-07	-0.0333413	PWWP2A	3514	5
ILMN_1653026	-5.6911	2.32922e-08	5.37518e-07	0.2148	PLAC8	84	4
ILMN_1798204	5.6884	2.36385e-08	5.44963e-07	0.300531	IL21R	2979	16
ILMN_2364357	5.68681	2.38434e-08	5.49136e-07	0.35236	RPS6KB2	1713	11
ILMN_1872404	5.68592	2.39591e-08	5.5125e-07	0.156413	CCDC50	2748	3
ILMN_1672717	5.68472	2.41159e-08	5.54305e-07	0.113711	TMEM254	1716	10
ILMN_2330341	5.68027	2.4707e-08	5.67324e-07	0.250882		801
ILMN_1783394	5.67764	2.50635e-08	5.74938e-07	-0.0840021	ATF4	593	22
ILMN_1705928	5.67668	2.51949e-08	5.77377e-07	0.0511576	SNRNP200	6984	2
ILMN_1669394	5.67506	2.54171e-08	5.8189e-07	0.343212		1900
ILMN_3299905	5.67089	2.60006e-08	5.94657e-07	0.272015	RNFT2	2236	12
ILMN_1707783	-5.66874	2.63063e-08	6.01052e-07	0.245016		18
ILMN_1738736	5.66758	2.64719e-08	6.04236e-07	0.255293	SNX4	2153	3
ILMN_1667330	-5.66653	2.66235e-08	6.07094e-07	0.556128	ERVK3-1	1082	19
ILMN_1703430	5.66421	2.69606e-08	6.14173e-07	0.19778	CCDC94	1323	19
ILMN_1762899	5.66122	2.74025e-08	6.23624e-07	-0.0387012	EGR1	2664	5
ILMN_1792885	-5.65934	2.76825e-08	6.29373e-07	0.163302	CTSC	172	11
ILMN_3258321	-5.65889	2.77503e-08	6.30293e-07	0.340714		484
ILMN_1681124	5.65419	2.8467e-08	6.45934e-07	0.0768251	C19orf48	256	19
ILMN_1651610	-5.654	2.84959e-08	6.45953e-07	0.154255	SPRY1	58	4
ILMN_1795639	5.65289	2.86687e-08	6.49232e-07	0.733095	MGMT	745	10
ILMN_1762801	-5.65222	2.8772e-08	6.5093e-07	0.120596		882
ILMN_1875123	5.65059	2.9028e-08	6.56078e-07	0.28321		205
ILMN_1803143	-5.65031	2.90709e-08	6.56405e-07	0.216306	SYVN1	2838	11
ILMN_1714397	5.65	2.91213e-08	6.56897e-07	0.325741	CRYL1	1169	13
ILMN_1673282	-5.64669	2.96465e-08	6.68087e-07	0.310178	LAMP2	1246	X
ILMN_1703228	5.64652	2.96754e-08	6.68087e-07	0.125715	AGFG2	1957	7
ILMN_1799069	-5.64584	2.97834e-08	6.69864e-07	0.108463		3557
ILMN_1677376	-5.64441	3.00161e-08	6.7444e-07	0.157023	CHD7	10088	8
ILMN_1765860	-5.64042	3.06713e-08	6.8849e-07	0.14363	DOCK11	6235	X
ILMN_1898124	5.63763	3.11365e-08	6.97816e-07	0.347461	SNHG15	2919	7
ILMN_1716895	-5.63757	3.11474e-08	6.97816e-07	0.269143		1360
ILMN_1748291	-5.63575	3.14549e-08	7.0402e-07	0.14494	SDE2	3462	1
ILMN_3267670	-5.62901	3.26211e-08	7.29415e-07	0.122885		2094
ILMN_1680782	5.6265	3.30665e-08	7.38656e-07	0.104097		3352	11
ILMN_1742866	5.62622	3.31164e-08	7.39053e-07	0.276641	F2R	2757	5
ILMN_1671005	5.62567	3.32151e-08	7.40539e-07	0.103118	IRF2BP2	1378	1
ILMN_2377733	5.62283	3.37278e-08	7.51242e-07	0.157532	CASP8	948	2
ILMN_1671932	5.62092	3.4078e-08	7.58311e-07	0.265024		1527
ILMN_1791569	5.61953	3.43338e-08	7.63264e-07	0.219107	PLXNA1	8773	3
ILMN_1731048	5.61347	3.54757e-08	7.87888e-07	0.279559	TLR1	2736	4
ILMN_1755077	5.61134	3.58849e-08	7.96208e-07	0.37057	HEBP2	804	6
ILMN_1659058	-5.61095	3.59606e-08	7.97122e-07	0.0856208		4171
ILMN_1675007	5.61001	3.61419e-08	8.0037e-07	0.0408276		1742
ILMN_1680390	5.60779	3.65765e-08	8.09215e-07	0.236507	GCNT2	4541	6
ILMN_2194627	-5.60703	3.6726e-08	8.11623e-07	0.236082	GMCL1	1511	2
ILMN_1694596	-5.60688	3.67558e-08	8.11623e-07	0.29299		1504
ILMN_1654542	5.60207	3.77197e-08	8.31578e-07	0.144402	FAM172A	3931	5
ILMN_2355953	5.60201	3.77317e-08	8.31578e-07	0.275856		1716
ILMN_1703487	-5.60058	3.80247e-08	8.37234e-07	0.282027	LMO4	1615	1
ILMN_3251472	5.5993	3.82871e-08	8.42206e-07	0.126957		3121
ILMN_1747160	5.59849	3.84546e-08	8.45083e-07	0.476355		1417
ILMN_1652677	-5.5979	3.85754e-08	8.46931e-07	0.187024	FAM89A	695	1
ILMN_1799575	-5.59295	3.9616e-08	8.68948e-07	0.323638	IL19	1680	1
ILMN_1666179	-5.59256	3.96984e-08	8.69926e-07	0.128322		68
ILMN_1780700	-5.58937	4.0385e-08	8.84133e-07	0.448651		250
ILMN_1729180	5.58837	4.06035e-08	8.88072e-07	0.297466	GATM	1603	15
ILMN_2132599	5.5875	4.07928e-08	8.91365e-07	0.168485	ANKRD22	794	10
ILMN_1661653	-5.58334	4.17143e-08	9.10636e-07	0.104404	DET1	1718	15
ILMN_2329927	-5.58171	4.20809e-08	9.17771e-07	0.264021	ABCG1	2214	21
ILMN_1797579	-5.57919	4.2654e-08	9.29388e-07	0.208476		841
ILMN_1707292	-5.57897	4.27031e-08	9.29579e-07	0.185317	C17orf67	679	17
ILMN_1702177	5.57602	4.33849e-08	9.4353e-07	0.182541	GLO1	1537	6
ILMN_2131861	5.57248	4.42147e-08	9.60669e-07	0.237418	SOCS2	1949	12
ILMN_1912827	-5.57134	4.44855e-08	9.65642e-07	0.211603		398
ILMN_3307791	-5.57116	4.45295e-08	9.65687e-07	0.149012	FAM69A	2471	1
ILMN_2358540	-5.57072	4.46346e-08	9.67056e-07	0.251494		2104
ILMN_2338323	-5.56922	4.49939e-08	9.73145e-07	0.155473	CDC25B	3361	20
ILMN_1712634	-5.56919	4.50002e-08	9.73145e-07	0.251916	TIA1	1258	2
ILMN_1685415	-5.568	4.52882e-08	9.78454e-07	0.174289	HBP1	2350	7
ILMN_1814526	-5.56476	4.60797e-08	9.94621e-07	0.258979	ADD3	4214	10
ILMN_1684349	5.56359	4.6369e-08	9.9993e-07	0.250557	IL2RB	3681	22
ILMN_3307700	-5.56216	4.67262e-08	1.00669e-06	0.273717		498
ILMN_2051684	-5.56182	4.68109e-08	1.00757e-06	0.231349		1376
ILMN_1711408	-5.55654	4.81511e-08	1.03545e-06	0.31801	ANXA4	1471	2
ILMN_1782538	-5.55548	4.84249e-08	1.03977e-06	0.147501		1132
ILMN_1892403	5.55541	4.84423e-08	1.03977e-06	0.257595		18
ILMN_1693367	-5.55454	4.86678e-08	1.04364e-06	0.00926449	TPD52	3627	8
ILMN_1792825	5.55314	4.90354e-08	1.05054e-06	0.14927	ARIH2	3820	3
ILMN_1691572	-5.54932	5.00437e-08	1.07093e-06	0.356033	TST	997	22
ILMN_1691567	5.54919	5.00798e-08	1.07093e-06	0.276367	GNPDA2	1435	4
ILMN_1665877	-5.54646	5.08146e-08	1.08563e-06	0.0946465	RNF149	1915	2
ILMN_1797107	-5.54492	5.12344e-08	1.09359e-06	0.136823		2462
ILMN_1776490	5.54411	5.14555e-08	1.09729e-06	0.269443	C17orf53	2596	17
ILMN_1666522	-5.5416	5.21506e-08	1.11108e-06	0.194414	ZDHHC14	920	6
ILMN_1662973	5.54052	5.2451e-08	1.11645e-06	0.156515	CD82	510	11
ILMN_1793302	-5.5378	5.32175e-08	1.13172e-06	0.212755	WDR4	1911	21
ILMN_1700967	5.5371	5.34151e-08	1.13487e-06	0.799974		3083
ILMN_1761456	-5.53663	5.35504e-08	1.13602e-06	0.300237	ALG13	389	X
ILMN_3235853	-5.53657	5.35676e-08	1.13602e-06	0.173531	S1PR1	2458	1
ILMN_2303166	-5.53379	5.43669e-08	1.15191e-06	0.311174		914
ILMN_1677484	5.53337	5.4489e-08	1.15343e-06	0.246261	SNAPC4	4557	9
ILMN_1784737	-5.53248	5.4746e-08	1.15781e-06	0.147515	S1PR4	1163	19
ILMN_2331658	5.53147	5.50416e-08	1.16299e-06	0.133008		4393
ILMN_1667966	5.52893	5.57904e-08	1.17773e-06	0.182324		6209
ILMN_1736888	-5.52833	5.59688e-08	1.18042e-06	0.247608	SAR1B	1081	5
ILMN_1784294	5.52815	5.60243e-08	1.18051e-06	0.378062	CPA4	2457	7
ILMN_3308335	5.52632	5.65731e-08	1.19086e-06	0.25384		39
ILMN_1669703	-5.52616	5.66191e-08	1.19086e-06	0.227142	TNK2	4337	3
ILMN_1752520	-5.52323	5.75098e-08	1.20849e-06	0.254234	SLFN11	4378	17
ILMN_1768534	5.52301	5.75774e-08	1.20881e-06	0.186361	BHLHE40	2510	3
ILMN_1716555	-5.52142	5.80666e-08	1.21797e-06	0.301053		1498
ILMN_2359029	5.51902	5.8811e-08	1.23246e-06	0.261463	AKIP1	1155	11
ILMN_1690138	-5.51867	5.89217e-08	1.23366e-06	0.0501068		910
ILMN_1753567	-5.51788	5.91678e-08	1.23767e-06	0.0406884	ZNF451	2743	6
ILMN_1782679	5.51771	5.92206e-08	1.23767e-06	0.204658	AHRR	2119	5
ILMN_1911059	-5.51384	6.04517e-08	1.26225e-06	0.208608		511
ILMN_1790562	5.51107	6.1349e-08	1.27983e-06	0.0566795	EYA3	1592	1
ILMN_1696028	-5.50953	6.18512e-08	1.28914e-06	0.129809	ETNK1	1686	12
ILMN_1822307	5.50857	6.21685e-08	1.29458e-06	0.246509		2663
ILMN_1799487	-5.50456	6.3504e-08	1.32119e-06	0.0845661	N4BP2L1	1662	13
ILMN_2404917	5.50213	6.43272e-08	1.33711e-06	0.116659	AFAP1L2	3123	10
ILMN_1710571	5.50095	6.47303e-08	1.34428e-06	0.343983	PAPD5	1496	16
ILMN_2060212	-5.50029	6.49598e-08	1.34783e-06	0.167128	TBC1D24	3932	16
ILMN_1771019	5.49939	6.52706e-08	1.35306e-06	0.139685	MTMR4	5475	17
ILMN_1666594	5.49914	6.53566e-08	1.35362e-06	0.317236	IRF8	2327	16
ILMN_1742124	5.49749	6.59287e-08	1.36341e-06	0.16518	CCSER2	6579	10
ILMN_1684255	-5.49732	6.5988e-08	1.36341e-06	0.193478		640
ILMN_1659914	5.49727	6.60066e-08	1.36341e-06	0.0747192	AK8	1876	9
ILMN_1713952	-5.49709	6.60688e-08	1.36347e-06	0.209118		3810
ILMN_1782167	5.49662	6.62332e-08	1.36564e-06	0.186042		2
ILMN_1666453	-5.49641	6.63082e-08	1.36596e-06	0.238224	STK3	2705	8
ILMN_1671116	5.4961	6.64159e-08	1.36696e-06	0.241884	XXYLT1	2573	3
ILMN_1677962	5.49529	6.67031e-08	1.37164e-06	0.25057	GPHN	3859	14
ILMN_1726516	5.49347	6.73493e-08	1.3837e-06	0.237654		5041
ILMN_1779214	-5.48982	6.8663e-08	1.40874e-06	0.335446	ATM	12641	11
ILMN_1843198	5.48974	6.86907e-08	1.40874e-06	0.086628		2302
ILMN_1655635	-5.48729	6.95895e-08	1.4259e-06	0.218323	METTL3	1538	14
ILMN_1851547	-5.48664	6.98267e-08	1.42949e-06	0.232077	FAM120C	2880	X
ILMN_3239937	-5.48548	7.02564e-08	1.43576e-06	0.141901		2126
ILMN_1758673	-5.48548	7.02578e-08	1.43576e-06	0.180219	SLC44A1	1908	9
ILMN_2338038	5.48367	7.09317e-08	1.44825e-06	0.0959334		2006
ILMN_1782098	5.48288	7.12287e-08	1.45303e-06	0.25124	SMO	3416	7
ILMN_1704529	5.48188	7.1606e-08	1.45943e-06	0.11673	PPIA	1215	7
ILMN_1652199	-5.48155	7.1732e-08	1.46071e-06	0.0646485		34
ILMN_2244547	5.47574	7.39673e-08	1.50489e-06	0.0411525	ETNK1	737	12
ILMN_2189458	5.47468	7.43838e-08	1.51203e-06	0.199196		1944
ILMN_1654639	-5.47421	7.45699e-08	1.51448e-06	0.190951	HERC6	3462	4
ILMN_2388547	-5.4706	7.60051e-08	1.54227e-06	0.289546	EPSTI1	1287	13
ILMN_2184966	-5.46924	7.65519e-08	1.55199e-06	0.51373	ZHX2	4223	8
ILMN_3282503	-5.46661	7.76216e-08	1.5723e-06	0.283339		37
ILMN_1753547	5.46582	7.79466e-08	1.57749e-06	0.0651945	STAT5A	3976	17
ILMN_1803302	-5.46452	7.84823e-08	1.58694e-06	0.10527		1867
ILMN_1704985	-5.46359	7.88676e-08	1.59333e-06	0.226477	CYP27A1	1710	2
ILMN_2273572	5.45964	8.0524e-08	1.62537e-06	0.0987947	OSCP1	648	1
ILMN_1742935	-5.4569	8.16943e-08	1.64755e-06	0.300925		5583
ILMN_1667356	-5.45411	8.29035e-08	1.67047e-06	0.296766	PPP1R21	3002	2
ILMN_1711748	5.45167	8.39768e-08	1.69062e-06	0.212957	PLTP	497	20
ILMN_1804454	-5.45073	8.43912e-08	1.69748e-06	0.175818	FAM135A	3883	6
ILMN_1729453	5.44835	8.54547e-08	1.71737e-06	0.146016	TSPAN9	4200	12
ILMN_1812981	5.44616	8.64468e-08	1.73579e-06	0.0691447	PXT1	998	6
ILMN_1790228	5.44578	8.66198e-08	1.73775e-06	0.15482	FURIN	3827	15
ILMN_2195821	-5.43848	9.00049e-08	1.80409e-06	0.120651	CREBRF	5038	5
ILMN_1737857	-5.43779	9.03323e-08	1.80835e-06	0.266971	GTF2B	822	1
ILMN_2080751	5.4377	9.03744e-08	1.80835e-06	0.0992047	ADNP2	5052	18
ILMN_2242463	-5.43725	9.05925e-08	1.81098e-06	0.20407	CTSC	1420	11
ILMN_1664170	5.43708	9.06697e-08	1.81098e-06	0.210507	CELF2	82	10
ILMN_1706873	-5.43693	9.07418e-08	1.81098e-06	0.23533	RPL34	496	4
ILMN_2065022	5.43641	9.0993e-08	1.81442e-06	0.211111	ARHGAP44	4039	17
ILMN_1808584	5.43514	9.15977e-08	1.8249e-06	0.246061	COX20	2341	1
ILMN_1870111	-5.43437	9.19682e-08	1.8307e-06	0.211194		1551
ILMN_1912333	-5.43325	9.25119e-08	1.83993e-06	0.0837371		557	1
ILMN_1751086	5.43246	9.28987e-08	1.84603e-06	0.127682	ATL3	1926	11
ILMN_3245564	5.43192	9.3158e-08	1.84959e-06	0.216719	ARHGAP44	4082	17
ILMN_1771233	5.42997	9.41175e-08	1.86703e-06	0.163359	CHMP4B	1357	20
ILMN_1690546	-5.42925	9.44763e-08	1.87253e-06	0.239062	PPP3CC	1750	8
ILMN_1696546	-5.42749	9.53507e-08	1.88824e-06	0.115818	FZD1	3181	7
ILMN_1745686	-5.42708	9.55571e-08	1.8907e-06	0.131754	MFHAS1	3476	8
ILMN_1780898	5.42679	9.57003e-08	1.89191e-06	0.241244	PRKCH	3172	14
ILMN_1805330	5.42625	9.59721e-08	1.89565e-06	0.179028	KLHL26	2776	19
ILMN_1795118	-5.42334	9.74498e-08	1.92319e-06	0.125985	SIDT1	4383	3
ILMN_1660343	-5.42094	9.868e-08	1.94514e-06	0.321598		6814
ILMN_1726520	5.42084	9.87305e-08	1.94514e-06	0.213915	TDP1	3602	14
ILMN_1848893	5.41948	9.94368e-08	1.95738e-06	0.0898046		446
ILMN_1801767	-5.41913	9.96204e-08	1.95931e-06	0.201683	ABHD3	1229	18
ILMN_1791593	-5.41824	1.00087e-07	1.96627e-06	0.366615	DENND5B	6346	12
ILMN_1674344	-5.41813	1.00145e-07	1.96627e-06	0.18423	PARD6G	3422	18
ILMN_1719039	5.41746	1.00495e-07	1.97146e-06	0.232688	UBE2G1	3881	17
ILMN_1813775	5.41496	1.01821e-07	1.99578e-06	0.262231	GAK	4241	4
ILMN_1680937	-5.41461	1.02005e-07	1.99677e-06	0.137524		351
ILMN_1684278	5.41454	1.02045e-07	1.99677e-06	0.109374	RPS8	20	1
ILMN_1719202	5.41408	1.02287e-07	1.99981e-06	0.171771	ZNF174	1447	16
ILMN_1694084	5.41289	1.02928e-07	2.01063e-06	0.178766	CYTH1	3020	17
ILMN_1775211	5.41117	1.03856e-07	2.02704e-06	0.357975	ERO1B	2290	1
ILMN_1771599	-5.41076	1.04082e-07	2.02973e-06	0.260283	PLOD2	3648	3
ILMN_2370208	5.40858	1.05276e-07	2.04886e-06	0.387057	CMTM3	1257	16
ILMN_1747857	5.40851	1.05313e-07	2.04886e-06	0.472477	SMARCE1	2227	17
ILMN_1791478	-5.40848	1.0533e-07	2.04886e-06	0.302106		3219	7
ILMN_1798270	5.40815	1.05511e-07	2.05065e-06	0.314612	SMCO4	736	11
ILMN_1779547	-5.40415	1.07739e-07	2.09219e-06	0.284384	HPSE	3178	4
ILMN_1749096	5.40376	1.07963e-07	2.09477e-06	0.206175		531
ILMN_1773407	-5.40359	1.08059e-07	2.09488e-06	0.157064	C16orf72	3734	16
ILMN_1657547	5.40214	1.08879e-07	2.10899e-06	0.258496	CCDC34	459	11
ILMN_1703565	5.40175	1.091e-07	2.11092e-06	0.282685	GLTSCR2	1389	19
ILMN_1787526	-5.40164	1.09162e-07	2.11092e-06	0.209807	C2orf88	522	2
ILMN_1795922	-5.40096	1.09551e-07	2.11668e-06	0.293853	ZNF830	940	17
ILMN_1811702	5.39899	1.10683e-07	2.1361e-06	0.207191	GRN	2150	17
ILMN_1713505	-5.39889	1.10742e-07	2.1361e-06	0.114352	NPC1	4250	18
ILMN_1711030	5.39818	1.11155e-07	2.14113e-06	0.277663	SMPD5	3869	8
ILMN_1686623	5.3981	1.11201e-07	2.14113e-06	0.198303	CSF1R	3881	5
ILMN_1653836	5.39796	1.11282e-07	2.14113e-06	0.0817073	KIAA1549L	11540	11
ILMN_1706326	-5.39698	1.1185e-07	2.15026e-06	0.194883		42
ILMN_1754234	-5.3967	1.12016e-07	2.15166e-06	0.131019	ZMYND11	3821	10
ILMN_2385647	5.39418	1.13496e-07	2.17827e-06	0.142139	ALAS1	2059	3
ILMN_1761733	5.39181	1.14908e-07	2.20354e-06	0.210735		1288
ILMN_1701487	-5.38967	1.16199e-07	2.22643e-06	0.0777634	TAOK2	4679	16
ILMN_3251232	5.38929	1.16432e-07	2.22905e-06	0.178928		1601
ILMN_1797964	-5.38689	1.17893e-07	2.25514e-06	0.23313		660
ILMN_2275098	5.38641	1.1819e-07	2.25895e-06	0.262411		2694
ILMN_2075643	-5.3855	1.18752e-07	2.26779e-06	0.222176	ANKRD29	1924	18
ILMN_1743199	5.38534	1.18849e-07	2.26779e-06	0.217403		2602
ILMN_1667222	5.38433	1.19478e-07	2.2779e-06	0.147216		1369
ILMN_1665095	5.38206	1.20902e-07	2.30314e-06	0.274883	NSMF	2888	9
ILMN_1887403	-5.38127	1.214e-07	2.31072e-06	0.0553298	DBT	5113	1
ILMN_1679438	5.37984	1.22305e-07	2.32466e-06	0.302056	PRIMPOL	2325	4
ILMN_1841970	-5.37979	1.22335e-07	2.32466e-06	0.380432		1754	10
ILMN_2374362	-5.37922	1.227e-07	2.32968e-06	0.300239	ABHD17B	1358	9
ILMN_3245062	-5.37676	1.24283e-07	2.35779e-06	0.160216	SHROOM3	10732	4
ILMN_3271092	-5.37643	1.24496e-07	2.35989e-06	0.28269	PPP1R21	3041	2
ILMN_1690101	-5.37484	1.25527e-07	2.37748e-06	0.369557	FAIM	704	3
ILMN_1691444	-5.37453	1.25729e-07	2.37934e-06	0.234706	UHRF2	2813	9
ILMN_2124064	5.37085	1.2816e-07	2.42337e-06	0.155869	REL	1726	2
ILMN_2341254	-5.3691	1.29335e-07	2.44356e-06	0.151645	STARD13	5492	13
ILMN_1731354	5.36858	1.29685e-07	2.44818e-06	0.128028	PARL	1046	3
ILMN_3238233	-5.36813	1.29988e-07	2.45188e-06	0.217131		209
ILMN_1694890	5.36793	1.30118e-07	2.45234e-06	0.0832613	TREX2	1126	X
ILMN_1815184	-5.36697	1.30771e-07	2.46067e-06	0.0751437	ASPM	10474	1
ILMN_1811648	5.36697	1.30774e-07	2.46067e-06	0.299906	DCAKD	1932	17
ILMN_2043079	5.36673	1.30932e-07	2.46163e-06	0.14864	ILDR1	2451	3
ILMN_1675640	-5.36579	1.31579e-07	2.47178e-06	0.119734	OAS1	1045	12
ILMN_1662483	-5.36408	1.32748e-07	2.4917e-06	0.548479		217
ILMN_2407308	-5.3626	1.33778e-07	2.50898e-06	0.239118	HEY1	1022	8
ILMN_1734830	-5.36168	1.34412e-07	2.51883e-06	0.372483	C1orf167	5712	1
ILMN_1739156	-5.36043	1.35289e-07	2.5332e-06	0.113669	DOPEY1	7476	6
ILMN_2401779	5.3587	1.36509e-07	2.55397e-06	0.30339		3768	9
ILMN_1810058	5.35842	1.36707e-07	2.55559e-06	0.184059		1285
ILMN_1770085	-5.35753	1.3734e-07	2.56535e-06	0.142316	BTG2	2218	1
ILMN_3235517	5.35507	1.39105e-07	2.59621e-06	0.132715	ZNF777	2867	7
ILMN_2408543	5.34982	1.42941e-07	2.66565e-06	0.155849	PLAUR	637	19
ILMN_1652280	5.34803	1.44274e-07	2.68834e-06	0.295095		263
ILMN_1659782	5.34571	1.46017e-07	2.71861e-06	0.162591		1311
ILMN_1787109	-5.34449	1.46946e-07	2.7337e-06	0.0674358		1795
ILMN_1762529	5.34405	1.47277e-07	2.73764e-06	0.3847	SLC12A8	2824	3
ILMN_1838313	5.34366	1.47581e-07	2.74107e-06	0.220221	LRRC8B	1945	1
ILMN_1827736	5.34215	1.48739e-07	2.76036e-06	0.107813		4469	X
ILMN_1729832	5.34133	1.49368e-07	2.76979e-06	0.0250402	EIF4H	413	7
ILMN_1796642	5.33962	1.507e-07	2.79225e-06	0.232865	NCF2	2056	1
ILMN_1806500	-5.33807	1.51906e-07	2.81009e-06	0.167069	CPNE5	2926	6
ILMN_2341467	5.33807	1.51907e-07	2.81009e-06	0.163843	PARL	1200	3
ILMN_1678934	5.33772	1.52182e-07	2.81249e-06	0.252189	POLR1E	1344	9
ILMN_1779257	5.33758	1.52299e-07	2.81249e-06	-0.00322161	CD40	843	20
ILMN_1781636	-5.33744	1.52403e-07	2.81249e-06	0.140924	VWA1	2150	1
ILMN_1709257	-5.33688	1.52848e-07	2.81845e-06	0.240412	RIPPLY3	1961	21
ILMN_1716279	-5.33261	1.56262e-07	2.87909e-06	0.0737333		8098
ILMN_2383163	-5.33062	1.57878e-07	2.90655e-06	0.32369	DEPDC7	770	11
ILMN_3271218	-5.32935	1.58914e-07	2.92328e-06	0.153028		241	7
ILMN_1708029	5.32919	1.59045e-07	2.92335e-06	0.272105	TMEM8B	1940	9
ILMN_1802380	-5.32653	1.61242e-07	2.96137e-06	0.197955	RERE	5965	1
ILMN_3248301	5.32281	1.64369e-07	3.0164e-06	0.177874	ZNF583	2005	19
ILMN_2103362	-5.3226	1.64551e-07	3.01733e-06	0.144181		3182
ILMN_1766045	-5.3219	1.65147e-07	3.02586e-06	0.108789	SH3GLB1	933	1
ILMN_1712184	-5.32108	1.65849e-07	3.03631e-06	0.203218	HIST1H3C	305	6
ILMN_2199676	-5.31989	1.66864e-07	3.05246e-06	0.198565	CEP152	4807	15
ILMN_3242567	5.31914	1.67512e-07	3.06189e-06	0.125477		2320
ILMN_1808059	5.31834	1.68208e-07	3.07217e-06	0.268206	BCAS4	1186	20
ILMN_2229969	5.31736	1.69057e-07	3.08523e-06	0.247364	ERO1B	2588	1
ILMN_1721626	-5.31382	1.72175e-07	3.13964e-06	0.210218	ARID5B	7061	10
ILMN_1786426	5.31276	1.73115e-07	3.15429e-06	0.4361	IGFLR1	956	19
ILMN_2352190	5.31122	1.74493e-07	3.17687e-06	0.234376	CLIP2	5264	7
ILMN_1683562	-5.3088	1.76682e-07	3.21418e-06	0.187613		325
ILMN_1752478	5.30757	1.77803e-07	3.23203e-06	0.145003	DHRS3	1562	1
ILMN_2271627	-5.30732	1.78034e-07	3.23367e-06	0.086457	ATXN2L	3788	16
ILMN_1750674	5.30653	1.78764e-07	3.24437e-06	0.381119	SDSL	1235	12
ILMN_2372974	5.30254	1.82465e-07	3.30894e-06	0.155093	SIRPA	3413	20
ILMN_1688666	-5.30185	1.83117e-07	3.31815e-06	0.136471	HIST1H2BH	352	6
ILMN_2076600	-5.30137	1.83569e-07	3.32373e-06	0.230095	ITM2A	1010	X
ILMN_1720889	-5.29933	1.85511e-07	3.35625e-06	0.122688	MSMO1	1548	4
ILMN_1657949	-5.29916	1.85671e-07	3.35651e-06	0.0796039		911
ILMN_1746704	5.29762	1.87148e-07	3.38055e-06	0.213628	TRIM8	2570	10
ILMN_1767662	-5.29741	1.87343e-07	3.38143e-06	0.148887	CERS6-AS1	6066	2
ILMN_1726842	5.29717	1.87581e-07	3.38306e-06	0.201591	TYW3	2267	1
ILMN_1671004	-5.29609	1.88624e-07	3.39921e-06	0.0885141		1238
ILMN_1690386	5.29479	1.8989e-07	3.41935e-06	0.168482	PET117	795	20
ILMN_3235404	5.29391	1.9075e-07	3.43216e-06	0.199049	METTL12	90	11
ILMN_3310391	5.29201	1.92617e-07	3.46304e-06	0.126181	PVT1	17	8
ILMN_1663722	5.29148	1.93143e-07	3.46979e-06	0.180546	DNAJB5	2114	9
ILMN_1718770	5.28881	1.95811e-07	3.51498e-06	0.238877	MAMSTR	1709	19
ILMN_1719649	-5.28793	1.96694e-07	3.52808e-06	0.173745		3777	1
ILMN_3307276	5.2858	1.98856e-07	3.56322e-06	0.127698		2092
ILMN_2066124	5.28561	1.99051e-07	3.56322e-06	0.302529	TUBB6	2820	18
ILMN_2047430	5.28555	1.99117e-07	3.56322e-06	0.147323	MARCH5	3446	10
ILMN_1701947	-5.28139	2.03404e-07	3.6371e-06	0.0738504	GPR34	1289	X
ILMN_1743032	-5.27759	2.07407e-07	3.70582e-06	0.167873	CTSS	3691	1
ILMN_1682208	-5.27501	2.10172e-07	3.75231e-06	0.202304	CACNB2	450	10
ILMN_3247939	5.27483	2.10366e-07	3.75286e-06	0.148628	SNORA23	136	11
ILMN_1689086	-5.27405	2.11209e-07	3.76498e-06	0.157562		5672
ILMN_1686662	-5.27151	2.13973e-07	3.8113e-06	0.14896	ANP32A	2801	15
ILMN_1733519	-5.27046	2.15128e-07	3.82892e-06	0.301797	HMGB3	3134	X
ILMN_1769520	-5.27013	2.15487e-07	3.83234e-06	0.0905491	UBE2L6	1184	11
ILMN_2257665	5.269	2.16742e-07	3.85169e-06	0.00667838		757
ILMN_1862180	-5.26754	2.1836e-07	3.87744e-06	0.0363042	C11orf95	4950	11
ILMN_1729212	-5.26621	2.1986e-07	3.89833e-06	0.187741	GRM8	3171	7
ILMN_1815479	-5.26619	2.19875e-07	3.89833e-06	0.202858		332
ILMN_1653504	-5.26591	2.20197e-07	3.90104e-06	0.201795	S1PR1	2079	1
ILMN_2393765	-5.26547	2.20693e-07	3.90563e-06	0.0327603		685
ILMN_2364272	-5.26538	2.20795e-07	3.90563e-06	0.133613	MBNL2	4315	13
ILMN_2342695	5.2623	2.24291e-07	3.96443e-06	0.277375	PDGFA	1522	7
ILMN_1760620	-5.26149	2.25228e-07	3.9777e-06	0.105366	TMEM33	2551	4
ILMN_2088990	-5.26135	2.25388e-07	3.9777e-06	0.566646	CXorf21	1372	X
ILMN_1702759	-5.26103	2.25759e-07	3.98121e-06	0.254196	TMX4	1682	20
ILMN_1697227	5.25867	2.28499e-07	4.02645e-06	0.627228	USP36	5726	17
ILMN_1678939	-5.2582	2.29051e-07	4.03308e-06	0.270169	VNN2	1828	6
ILMN_1747146	-5.25775	2.29571e-07	4.03915e-06	0.370343		1161
ILMN_1734702	-5.2574	2.29981e-07	4.04328e-06	0.218384		668
ILMN_3279219	-5.25689	2.30579e-07	4.05071e-06	0.28713		234
ILMN_2121816	5.2567	2.30813e-07	4.05172e-06	0.211098	GPR137B	1686	1
ILMN_1720083	5.25548	2.32255e-07	4.07392e-06	0.291814	EHD4	2642	15
ILMN_1693269	5.25316	2.35024e-07	4.11935e-06	0.154974	GNG8	104	19
ILMN_2127328	-5.25265	2.35626e-07	4.12676e-06	0.136386	PURA	2062	5
ILMN_2408430	5.25133	2.37229e-07	4.14857e-06	0.327447	LARGE1	3562	22
ILMN_2143261	5.25132	2.37231e-07	4.14857e-06	0.292204		1044
ILMN_3235270	5.25076	2.37914e-07	4.15736e-06	0.0789621	NOL11	76	17
ILMN_1683475	5.24972	2.39181e-07	4.17633e-06	0.152314		1560
ILMN_1738362	-5.24936	2.39622e-07	4.18086e-06	0.215043		4
ILMN_1766637	-5.24902	2.40033e-07	4.18486e-06	0.398363	GLA	1207	X
ILMN_3260111	5.24596	2.43818e-07	4.24764e-06	0.144059		1464
ILMN_1694504	5.24469	2.45394e-07	4.26682e-06	0.170958	RNF220	2810	1
ILMN_2335604	5.24452	2.45615e-07	4.26682e-06	0.233069		968
ILMN_1777745	-5.24451	2.45623e-07	4.26682e-06	0.145562	FAM133B	2190	7
ILMN_3251742	-5.24448	2.4566e-07	4.26682e-06	0.174049		4618
ILMN_3243705	5.24012	2.51175e-07	4.35932e-06	0.174623		3621
ILMN_1756877	5.23907	2.5253e-07	4.37952e-06	0.0809947	IFT43	514	14
ILMN_1673305	5.2387	2.53e-07	4.38438e-06	0.201726	RHOC	1249	1
ILMN_1712430	5.23698	2.55225e-07	4.41962e-06	0.564947	ATP5G1	59	17
ILMN_1778478	5.23651	2.55843e-07	4.42699e-06	0.177596	CCDC28B	1274	1
ILMN_1662359	-5.23173	2.6215e-07	4.53272e-06	0.197722		61
ILMN_2147251	5.22867	2.66264e-07	4.60039e-06	0.432339		1908
ILMN_2224290	-5.22833	2.6672e-07	4.60304e-06	0.456458		2224
ILMN_1805228	5.22826	2.66817e-07	4.60304e-06	0.183966	LRG1	1647	19
ILMN_1737312	5.22224	2.75103e-07	4.74244e-06	0.133391	SLC25A17	1998	22
ILMN_2202915	-5.22086	2.77041e-07	4.77228e-06	0.313132	FAR2	1910	12
ILMN_2355462	5.2207	2.77261e-07	4.77249e-06	0.35476	CYFIP1	2772	15
ILMN_1685978	-5.22026	2.77882e-07	4.7771e-06	0.294021	ATPIF1	1501	1
ILMN_1776858	5.22022	2.77943e-07	4.7771e-06	0.171162	DUS4L	2016	7
ILMN_1728934	-5.21895	2.79743e-07	4.80444e-06	0.145378	PRC1	2789	15
ILMN_1690420	-5.21676	2.82865e-07	4.85445e-06	0.220501	GFI1	2377	1
ILMN_2323385	-5.2165	2.83239e-07	4.85724e-06	0.351337	TRIM4	2595	7
ILMN_1716195	-5.21599	2.8398e-07	4.86633e-06	0.143562	HIST1H2BG	129	6
ILMN_1662618	5.21426	2.86485e-07	4.90561e-06	0.162305	SQSTM1	1813	5
ILMN_2100458	5.21314	2.88107e-07	4.92972e-06	0.13716		1588
ILMN_1688098	5.21134	2.90763e-07	4.97146e-06	0.511502	TBC1D4	5774	13
ILMN_3249235	-5.20916	2.93988e-07	5.02288e-06	0.10179	GIN1	3465	5
ILMN_1680134	5.20724	2.96861e-07	5.0682e-06	0.148353	CARM1	2806	19
ILMN_1657288	5.20605	2.98665e-07	5.09523e-06	0.235332		2
ILMN_1721657	5.20495	3.00337e-07	5.11996e-06	0.171412	RSU1	3536	10
ILMN_2406043	5.20374	3.0218e-07	5.14757e-06	0.102605		2726
ILMN_1726512	5.20288	3.03494e-07	5.16613e-06	0.31235	ZSCAN2	3565	15
ILMN_1677439	5.20258	3.03958e-07	5.17021e-06	0.162159	GLS2	2234	12
ILMN_1692107	-5.20226	3.04448e-07	5.17472e-06	0.0994272	KMT5B	4330	11
ILMN_2185845	5.2007	3.06861e-07	5.21188e-06	0.185686		3011	19
ILMN_1696757	-5.19947	3.08787e-07	5.24073e-06	0.202812	TTC14	3847	3
ILMN_1662130	5.19608	3.1412e-07	5.32731e-06	0.264956		4430
ILMN_1801254	-5.19533	3.15317e-07	5.34368e-06	0.474143		168
ILMN_1694174	5.1937	3.17924e-07	5.38391e-06	0.218821	TRIM68	3103	11
ILMN_1815445	5.19271	3.19535e-07	5.40468e-06	0.277417	IDS	939	X
ILMN_1804884	-5.19265	3.1962e-07	5.40468e-06	0.143293	C22orf39	905	22
ILMN_1781285	5.1916	3.2132e-07	5.42944e-06	0.205921	DUSP1	1591	5
ILMN_2413331	5.18992	3.2407e-07	5.47189e-06	0.59822		1269
ILMN_1734878	-5.18785	3.27477e-07	5.52536e-06	0.224411	CD79A	1055	19
ILMN_3238358	5.18669	3.29403e-07	5.55379e-06	0.227993	SCARNA22	67	4
ILMN_1670172	-5.18544	3.31491e-07	5.58491e-06	0.161252	WDR33	965	2
ILMN_1785439	-5.1835	3.34744e-07	5.63559e-06	0.226298	CD79B	849	17
ILMN_1744725	5.17952	3.41547e-07	5.74592e-06	0.352001		1678
ILMN_2236655	-5.1771	3.45744e-07	5.81228e-06	0.0154391	HM13	1538	20
ILMN_1667744	-5.17631	3.47119e-07	5.83114e-06	0.111096	GNAL	1780	18
ILMN_1682774	-5.17532	3.48858e-07	5.85609e-06	0.293461	TEX30	724	13
ILMN_1700923	-5.17471	3.49932e-07	5.86653e-06	0.382578	ATG4C	1273	1
ILMN_3310351	5.17468	3.4999e-07	5.86653e-06	0.248152		42
ILMN_2368530	5.17417	3.5089e-07	5.87734e-06	0.400371	IL32	355	16
ILMN_3255061	5.1736	3.51893e-07	5.88986e-06	0.255018	SPECC1	3468	17
ILMN_1798659	-5.17068	3.57119e-07	5.97298e-06	0.193359	CCDC28A	1323	6
ILMN_1697472	5.16955	3.59157e-07	6.00272e-06	0.158292	TM2D3	149	15
ILMN_1782761	-5.16682	3.64125e-07	6.08134e-06	0.104188	ARHGAP20	5641	11
ILMN_1736441	5.16605	3.65549e-07	6.1007e-06	0.241167	SH3BP1	1820	22
ILMN_3239445	-5.16503	3.67431e-07	6.12767e-06	0.11697	ZBTB42	3563	14
ILMN_1684158	-5.1622	3.72696e-07	6.21096e-06	0.227343	GPT2	3853	16
ILMN_1694878	5.16178	3.73483e-07	6.21959e-06	0.272497		904
ILMN_1670037	-5.1595	3.77803e-07	6.28698e-06	0.295295	POLR2L	575	11
ILMN_1669070	5.15876	3.79211e-07	6.30585e-06	0.155356	MIPEP	1986	13
ILMN_1671800	-5.15849	3.7972e-07	6.30977e-06	0.168893	CRNDE	7	16
ILMN_1769229	5.15619	3.84142e-07	6.37864e-06	0.567361		563
ILMN_1743396	5.1547	3.87037e-07	6.42208e-06	0.481278		2284
ILMN_2043809	5.15411	3.88187e-07	6.43653e-06	0.168942	PFKM	2556	12
ILMN_1712082	5.15293	3.90483e-07	6.46994e-06	0.335473	GCNT3	1975	15
ILMN_1795762	5.15183	3.92662e-07	6.50136e-06	0.182367	PLEK	2532	2
ILMN_2225608	-5.1514	3.93502e-07	6.5106e-06	0.068575	FAM135A	4898	6
ILMN_2067852	5.14989	3.96506e-07	6.55558e-06	0.0545811	SLC30A1	1579	1
ILMN_1660629	5.14844	3.99392e-07	6.59857e-06	0.142933	NBEAL2	8729	3
ILMN_2349061	-5.14667	4.02964e-07	6.65136e-06	0.0518521		1471
ILMN_1707631	5.14657	4.03165e-07	6.65136e-06	0.178599	MED10	647	5
ILMN_2310909	-5.14624	4.03842e-07	6.65776e-06	0.0897057	ATP2A3	4248	17
ILMN_1675472	-5.14594	4.04435e-07	6.66277e-06	0.264176		4599
ILMN_1779648	-5.1457	4.04938e-07	6.66628e-06	0.316597	HIST3H2A	191	1
ILMN_1656837	5.14457	4.07234e-07	6.69929e-06	0.167603	RBP1	382	3
ILMN_1807807	-5.14209	4.12326e-07	6.77613e-06	0.110605		726
ILMN_1751264	5.14201	4.12493e-07	6.77613e-06	0.531904	CCDC126	1772	7
ILMN_1805916	5.14102	4.14549e-07	6.80505e-06	0.303747	THOC5	2030	22
ILMN_1752988	5.14043	4.1578e-07	6.8204e-06	0.324554	AKIP1	1290	11
ILMN_2188862	5.1393	4.18149e-07	6.85437e-06	0.149077	GDF15	894	19
ILMN_1893511	-5.13877	4.1925e-07	6.86753e-06	0.0642417		869	5
ILMN_1656082	-5.13567	4.25829e-07	6.97034e-06	0.199429		375
ILMN_1711702	-5.13307	4.31402e-07	7.05655e-06	0.167234	CLEC2D	987	12
ILMN_3234948	-5.13292	4.31721e-07	7.05676e-06	0.201241		282
ILMN_1663618	5.13273	4.32135e-07	7.05852e-06	0.22802	STAT3	4254	17
ILMN_1724598	5.13217	4.33358e-07	7.07347e-06	0.160784		1218
ILMN_1682288	-5.1319	4.33935e-07	7.07787e-06	0.373126		419
ILMN_1700232	-5.12945	4.39308e-07	7.15989e-06	0.139632	FBXO30	3736	6
ILMN_1787461	5.12924	4.39753e-07	7.15989e-06	0.21397	RUNX3	4087	1
ILMN_2397954	5.12918	4.39896e-07	7.15989e-06	0.225393		2274
ILMN_2091375	-5.12875	4.40837e-07	7.17014e-06	0.26223	KRCC1	1110	2
ILMN_1666545	5.12831	4.41819e-07	7.18104e-06	0.127866	GCNT1	4921	9
ILMN_1913937	-5.12727	4.44127e-07	7.21347e-06	0.176726	MIR181A1HG	410	1
ILMN_3181215	5.12704	4.44633e-07	7.21659e-06	0.132306	AGFG1	7176	2
ILMN_2371590	-5.12532	4.48481e-07	7.27392e-06	0.427513	DDX17	3950	22
ILMN_1680274	-5.12331	4.53017e-07	7.34232e-06	0.0642568		247
ILMN_1710017	-5.12303	4.53639e-07	7.34722e-06	0.0987675	CD79B	405	17
ILMN_1749960	5.12196	4.56084e-07	7.38164e-06	0.225535	FAM78B	1434	1
ILMN_1803953	-5.12151	4.57093e-07	7.39277e-06	0.212074		219
ILMN_1752923	-5.11936	4.62037e-07	7.46749e-06	0.0683916	IFNAR1	5735	21
ILMN_1778010	5.1191	4.62655e-07	7.47224e-06	0.462821	IL32	779	16
ILMN_1795963	5.11835	4.64381e-07	7.49486e-06	0.192177		2345
ILMN_1728517	5.11741	4.66569e-07	7.52489e-06	0.298886	FNTB	2634	14
ILMN_1720303	-5.11677	4.68071e-07	7.54383e-06	0.0933165	OSTM1	4013	6
ILMN_3243714	5.11576	4.70429e-07	7.57204e-06	0.792866		219
ILMN_1768488	-5.11574	4.70478e-07	7.57204e-06	0.264351	TERF2	2517	16
ILMN_1708782	-5.11511	4.7197e-07	7.59074e-06	0.0719628	MFAP3	2585	5
ILMN_1805853	5.11286	4.77294e-07	7.67102e-06	0.461254	PHLDB3	1111	19
ILMN_1728059	5.11262	4.77855e-07	7.67467e-06	0.164203		121
ILMN_2389429	-5.11222	4.78816e-07	7.68475e-06	0.0617176	DCUN1D4	1969	4
ILMN_1804895	-5.11084	4.82139e-07	7.73269e-06	0.0712419	LSMEM1	1277	7
ILMN_2326273	-5.11061	4.82697e-07	7.73625e-06	0.883778	CHI3L2	1197	1
ILMN_1702447	-5.11003	4.84086e-07	7.75312e-06	0.112208		3303
ILMN_1821176	-5.10919	4.86111e-07	7.77979e-06	0.384248		507
ILMN_2232177	-5.10906	4.86427e-07	7.77979e-06	0.25227	ACTN1	2979	14
ILMN_1798346	-5.10785	4.8938e-07	7.82159e-06	0.100911	KIAA1468	3869	18
ILMN_1913678	-5.10746	4.90324e-07	7.82718e-06	0.363763	IRAK3	2579	12
ILMN_1691466	-5.10735	4.90594e-07	7.82718e-06	0.234918		4343
ILMN_1805750	-5.10729	4.9075e-07	7.82718e-06	0.474354		482
ILMN_1717163	-5.10574	4.94559e-07	7.88248e-06	0.311486	F13A1	3243	6
ILMN_1764788	5.10513	4.96078e-07	7.90123e-06	0.326031	TNFRSF1B	3526	1
ILMN_1709114	-5.10382	4.99328e-07	7.945e-06	0.193192	TAB1	2992	22
ILMN_1668484	5.10374	4.99516e-07	7.945e-06	0.319134	LRRC47	2429	1
ILMN_1659075	5.10357	4.99933e-07	7.94614e-06	0.260222		3188
ILMN_1786105	-5.10342	5.00302e-07	7.94652e-06	0.111938	PCBD1	707	10
ILMN_2253300	-5.10288	5.01654e-07	7.9625e-06	0.192436	TM9SF1	1907	14
ILMN_1652472	-5.10222	5.03307e-07	7.98324e-06	0.206642		2069
ILMN_1800958	5.09824	5.13402e-07	8.13775e-06	0.260252	TMEM237	1164	2
ILMN_1874613	5.09727	5.15883e-07	8.17145e-06	0.139059	ATP5A1	186	18
ILMN_1804676	-5.09707	5.16388e-07	8.17383e-06	0.262462	VAMP4	510	1
ILMN_1745806	5.09593	5.19349e-07	8.21506e-06	0.198736	PEMT	886	17
ILMN_2356068	-5.09418	5.23898e-07	8.28133e-06	0.0796044	CDK13	4751	7
ILMN_1776788	-5.0937	5.25145e-07	8.29535e-06	0.0993724	CREBRF	4909	5
ILMN_1685952	-5.09246	5.28379e-07	8.3407e-06	0.227238	ACSM3	1229	16
ILMN_1795507	-5.09034	5.33987e-07	8.42101e-06	0.331049	ABCA6	2122	17
ILMN_1692199	-5.09026	5.34197e-07	8.42101e-06	0.154429	RNF103	2995	2
ILMN_2352097	5.0886	5.38632e-07	8.48512e-06	0.0908034	ADGRG1	3563	16
ILMN_1683487	5.08772	5.40994e-07	8.51649e-06	0.460296		2048
ILMN_1683598	-5.08724	5.42297e-07	8.53118e-06	0.208762		4564
ILMN_1787378	-5.08637	5.44656e-07	8.56243e-06	0.209557	ADD3	2132	10
ILMN_1801421	5.08515	5.47966e-07	8.60848e-06	0.231668	EMD	995	X
ILMN_1812968	-5.08501	5.48332e-07	8.60848e-06	0.455264	SOX18	1514	20
ILMN_1711894	5.08306	5.53682e-07	8.68655e-06	0.166487	MYB	3164	6
ILMN_1879066	-5.08066	5.60326e-07	8.7848e-06	0.170462		443
ILMN_1655195	-5.08036	5.61161e-07	8.79191e-06	0.354771		372
ILMN_1793371	-5.08005	5.62018e-07	8.79935e-06	0.20878		7285
ILMN_1818617	-5.079	5.64946e-07	8.82766e-06	0.151525	RYK	1209	3
ILMN_1718069	-5.079	5.64952e-07	8.82766e-06	0.112756	MIS12	2279	17
ILMN_1695891	-5.07899	5.64976e-07	8.82766e-06	0.0760533		50
ILMN_3239060	5.07809	5.67512e-07	8.86127e-06	0.296258	KRBA1	3944	7
ILMN_2384241	-5.07766	5.68727e-07	8.87422e-06	0.205958	TGFBR2	4260	3
ILMN_1739864	-5.07731	5.6972e-07	8.8837e-06	0.022772		3264
ILMN_1707695	-5.07627	5.72657e-07	8.92345e-06	0.216609		1506
ILMN_1714082	5.07529	5.75454e-07	8.96097e-06	0.204784	CMAS	1208	12
ILMN_2361643	5.07489	5.76614e-07	8.97297e-06	0.189629		836
ILMN_1798448	5.07464	5.77314e-07	8.97402e-06	0.268283	IDS	1223	X
ILMN_2398274	-5.07459	5.77461e-07	8.97402e-06	0.080692		491
ILMN_1788540	5.07403	5.79058e-07	8.99277e-06	0.434662		1111
ILMN_1783621	-5.07103	5.87742e-07	9.12149e-06	0.230397	CMPK2	1356	2
ILMN_1712798	5.07079	5.88443e-07	9.12621e-06	0.301357	ZNF608	5376	5
ILMN_1733654	5.07015	5.90334e-07	9.14938e-06	0.193344	CXorf40B	217	X
ILMN_1678841	5.06922	5.93053e-07	9.18535e-06	0.293963		530
ILMN_1670532	-5.06603	6.0251e-07	9.32155e-06	0.234562	GMCL1	1426	2
ILMN_1736655	5.06598	6.02657e-07	9.32155e-06	0.1443	LCE1B	880	1
ILMN_1669905	-5.06396	6.08723e-07	9.40906e-06	0.187239	DCP2	8671	5
ILMN_1671423	-5.06308	6.11364e-07	9.44354e-06	0.353083		3904
ILMN_1812226	5.06207	6.14449e-07	9.48484e-06	0.0106759	ICAM1	2645	19
ILMN_2392274	5.05866	6.24912e-07	9.63989e-06	0.0947102	CD82	1248	11
ILMN_2052871	-5.05772	6.27835e-07	9.67478e-06	0.263328	TMEM116	1330	12
ILMN_1801464	-5.05766	6.28014e-07	9.67478e-06	0.0151539	ANKFY1	1638	17
ILMN_1792682	-5.05671	6.30981e-07	9.71398e-06	0.220063	MCTP2	2372	15
ILMN_1672884	5.05486	6.36756e-07	9.79586e-06	0.192867	MTFMT	1055	15
ILMN_1752837	5.05461	6.37552e-07	9.79586e-06	0.223734	ARL8B	2530	3
ILMN_3233930	5.0546	6.37575e-07	9.79586e-06	0.242607		1466
ILMN_1678671	-5.05352	6.4101e-07	9.84206e-06	0.0574645	KLHL24	7103	3
ILMN_1753472	5.05204	6.45705e-07	9.90755e-06	0.173183	SUMF1	1911	3
ILMN_1788841	-5.05112	6.48662e-07	9.9463e-06	0.17606	TCL1A	1028	14
ILMN_1758864	-5.04961	6.53511e-07	1.0014e-05	0.307945	VNN2	5	6
ILMN_1699214	-5.04826	6.57904e-07	1.00746e-05	0.0853386		46
ILMN_1761464	5.04549	6.66969e-07	1.02066e-05	0.12808	CD74	741	5
ILMN_1753275	5.04498	6.68631e-07	1.02253e-05	0.0943329	DENND1A	4788	9
ILMN_1739032	5.044	6.71886e-07	1.02682e-05	0.0616757	TMEM70	1952	8
ILMN_1776337	-5.04079	6.82627e-07	1.04254e-05	0.126806		1301
ILMN_1743104	-5.04055	6.83431e-07	1.04308e-05	0.272649		1437
ILMN_1652521	5.03916	6.8813e-07	1.04956e-05	0.0802604	MTMR9	7181	8
ILMN_1747223	-5.03517	7.01819e-07	1.06973e-05	0.221457	FRYL	11369	4
ILMN_1666976	5.03497	7.02503e-07	1.07006e-05	0.215122	PLD3	1838	19
ILMN_1729142	5.03418	7.05246e-07	1.07353e-05	0.321797	CENPV	927	17
ILMN_2410986	5.03299	7.09391e-07	1.07913e-05	0.238653	STAT3	4225	17
ILMN_1755405	5.0319	7.13222e-07	1.08424e-05	0.302673	PGAP2	1834	11
ILMN_1689294	-5.0286	7.24902e-07	1.10127e-05	0.061674	HSPA8	145	11
ILMN_1711227	5.02788	7.27482e-07	1.10446e-05	0.217454	GMDS	1496	6
ILMN_2358560	5.02681	7.31311e-07	1.10954e-05	0.346355	TIAM2	1895	6
ILMN_1671427	5.02574	7.35194e-07	1.1147e-05	0.183922	FBXW4	1991	10
ILMN_1873838	-5.02401	7.4147e-07	1.12347e-05	0.0514951	IGKV5-2	259	2
ILMN_1687284	5.02368	7.42694e-07	1.12459e-05	0.202224		1969
ILMN_1687947	-5.02352	7.43256e-07	1.1247e-05	0.215068		344
ILMN_1871373	5.02106	7.52313e-07	1.13766e-05	0.187762		424	6
ILMN_1779486	-5.02081	7.53258e-07	1.13773e-05	0.116912	FAM126B	2988	2
ILMN_3228852	-5.02078	7.53351e-07	1.13773e-05	0.118876		551	17
ILMN_1770373	-5.02029	7.55164e-07	1.13972e-05	0.0665768	TMEM39A	2433	3
ILMN_1780397	-5.01931	7.58827e-07	1.1445e-05	0.278618	TRAF3IP3	1708	1
ILMN_2215862	-5.01805	7.63553e-07	1.1505e-05	0.207446		7968
ILMN_1754279	-5.01798	7.63806e-07	1.1505e-05	0.257217	FBXW7	3614	4
ILMN_2148679	-5.01446	7.77143e-07	1.16983e-05	0.127944		14386
ILMN_1810229	-5.01408	7.78587e-07	1.17124e-05	0.0896008	ARID4A	4318	14
ILMN_3248091	5.01012	7.93888e-07	1.19348e-05	0.215693	C6orf223	2526	6
ILMN_2173919	5.00931	7.97027e-07	1.19741e-05	0.214607	MYO9A	8059	15
ILMN_1755737	5.0079	8.0257e-07	1.20495e-05	0.304989	TRABD	2241	22
ILMN_1742827	5.00597	8.10217e-07	1.21564e-05	0.206556	EXOC4	4018	7
ILMN_1729161	5.00565	8.11473e-07	1.21673e-05	0.255497	NOTCH1	9110	9
ILMN_2325506	5.00498	8.14168e-07	1.21998e-05	0.385371	BCAS4	1274	20
ILMN_1812384	5.00428	8.16949e-07	1.22335e-05	0.186232	NR3C1	739	5
ILMN_2041788	-5.00339	8.20527e-07	1.22791e-05	0.248375	PLS3	2836	X
ILMN_1822333	-5.00249	8.24177e-07	1.23257e-05	0.193758	CD28	115	2
ILMN_1654289	5.00207	8.25866e-07	1.2343e-05	0.168371	ELK1	2619	X
ILMN_1681543	-5.0002	8.3349e-07	1.24488e-05	0.114462	RHBDD1	1829	2
ILMN_2371458	4.99853	8.40306e-07	1.25425e-05	0.265282	ACKR3	1735	2
ILMN_1788180	4.9979	8.42934e-07	1.25736e-05	0.218612		769
ILMN_2148668	-4.99615	8.50201e-07	1.26738e-05	0.183982	RCBTB2	2782	13
ILMN_3245678	4.99527	8.53837e-07	1.27197e-05	0.242202		4
ILMN_1672589	-4.99511	8.54527e-07	1.27218e-05	0.216696	SEMA4B	3512	15
ILMN_1658182	-4.9927	8.64656e-07	1.28643e-05	0.159933	MEX3C	3380	18
ILMN_1680393	4.99252	8.65437e-07	1.28676e-05	0.21961	RPS8	19	1
ILMN_1739428	-4.99064	8.73423e-07	1.29743e-05	0.261153	IFIT2	2860	10
ILMN_2375973	-4.99057	8.73739e-07	1.29743e-05	0.192007	ALKBH1	1417	14
ILMN_1823112	-4.98934	8.79031e-07	1.30444e-05	0.157507	RBM45	1773	2
ILMN_1698243	4.98912	8.79975e-07	1.305e-05	0.241805	TMEM79	1439	1
ILMN_1663575	-4.98891	8.80884e-07	1.30551e-05	0.223509		728
ILMN_2394296	-4.98875	8.81538e-07	1.30564e-05	0.233225	SAR1B	530	5
ILMN_2209766	-4.98801	8.84735e-07	1.30953e-05	0.142584	RHBDD1	1958	2
ILMN_1706505	-4.98523	8.9687e-07	1.32664e-05	0.403296	COL5A1	6329	9
ILMN_1742611	-4.98495	8.98084e-07	1.32758e-05	0.135021	C1orf52	1093	1
ILMN_1746175	4.98433	9.00803e-07	1.33075e-05	0.187173	TNFSF4	2793	1
ILMN_2273103	-4.9832	9.05833e-07	1.33732e-05	0.118396	ELK4	2832	1
ILMN_1718831	4.98279	9.07639e-07	1.33832e-05	0.0848656	TMEM57	2114	1
ILMN_2053281	-4.98278	9.07671e-07	1.33832e-05	0.358049		943
ILMN_3294405	-4.98005	9.19861e-07	1.35543e-05	0.12799		3521
ILMN_1747183	-4.9779	9.29573e-07	1.36886e-05	0.0648261		6969
ILMN_1664016	-4.97713	9.33076e-07	1.37314e-05	0.211083		5184	19
ILMN_1682935	-4.97687	9.34277e-07	1.37403e-05	0.299474		70
ILMN_1806908	4.97672	9.34968e-07	1.37417e-05	0.331522	PRKCB	3120	16
ILMN_1693882	-4.97389	9.47968e-07	1.39239e-05	0.137839	TAPT1	3556	4
ILMN_2367165	-4.97353	9.49655e-07	1.39398e-05	0.0789398	ABTB1	1453	3
ILMN_2413259	-4.97333	9.50542e-07	1.39439e-05	0.137774	SOCS4	6206	14
ILMN_3237850	-4.97202	9.56639e-07	1.4018e-05	0.223796	C5orf51	4610	5
ILMN_3238672	4.97199	9.56811e-07	1.4018e-05	0.113713	EIF4A2	46	3
ILMN_2397750	-4.97075	9.62606e-07	1.40939e-05	0.316083	IVNS1ABP	3131	1
ILMN_2285112	-4.97048	9.63874e-07	1.41035e-05	0.0790813	FBXO11	3717	2
ILMN_1677158	4.96575	9.86353e-07	1.44233e-05	0.0168663	IGFBPL1	629	9
ILMN_1702691	4.9655	9.87592e-07	1.44323e-05	0.182675	TNFAIP3	4017	6
ILMN_1712657	-4.96439	9.92915e-07	1.45008e-05	0.227424		9743
ILMN_1688103	4.96369	9.96321e-07	1.45414e-05	0.190652	CTNNBIP1	2730	1
ILMN_1762275	-4.96285	1.0004e-06	1.45917e-05	0.063785	CSE1L	1696	20
ILMN_1694466	4.96243	1.00247e-06	1.46126e-05	0.221474		4279
ILMN_1659524	-4.96226	1.00327e-06	1.46151e-05	0.155719		146
ILMN_1803906	-4.96091	1.00992e-06	1.47025e-05	0.23447		1505
ILMN_2069593	-4.96037	1.01257e-06	1.47319e-05	0.238018	SCAF11	4246	12
ILMN_1810053	-4.95995	1.01466e-06	1.4753e-05	0.163752	SLC16A7	2789	12
ILMN_1710906	-4.9563	1.03283e-06	1.50076e-05	0.174944	RNF145	2888	5
ILMN_1758543	-4.95541	1.0373e-06	1.50631e-05	0.138668	CNIH1	587	14
ILMN_3219806	-4.95177	1.05583e-06	1.53149e-05	0.219608		1167
ILMN_1739508	-4.95175	1.05597e-06	1.53149e-05	0.0770653		46
ILMN_2305544	-4.95135	1.05799e-06	1.53345e-05	0.331792		397
ILMN_1766275	4.95103	1.05965e-06	1.5349e-05	0.0895023	PIK3CD	4829	1
ILMN_1660232	4.95067	1.0615e-06	1.5366e-05	0.449835		2986
ILMN_1697268	4.95045	1.06267e-06	1.53734e-05	0.331152	EMILIN2	3844	18
ILMN_1796417	4.9489	1.0707e-06	1.54762e-05	0.228279		2101
ILMN_1784207	4.94882	1.07113e-06	1.54762e-05	0.177408	PITHD1	1265	1
ILMN_1679881	4.9471	1.08011e-06	1.55963e-05	0.14129	WRN	5229	8
ILMN_1651699	-4.94676	1.08187e-06	1.56118e-05	0.154968	EPS8	3450	12
ILMN_1708660	4.94572	1.08739e-06	1.56817e-05	0.0510162		2416
ILMN_1672128	4.94517	1.09028e-06	1.57136e-05	0.10308		1934
ILMN_2339202	-4.94473	1.09262e-06	1.57374e-05	0.558056	KTN1	4021	14
ILMN_1772700	4.94355	1.09891e-06	1.58182e-05	0.183312	TMEM18	1631	2
ILMN_3251526	4.94233	1.10542e-06	1.59019e-05	0.221882	USP13	7681	3
ILMN_1668027	-4.94204	1.107e-06	1.59147e-05	0.0588932	NDUFB4	1132	3
ILMN_3235597	-4.94018	1.11702e-06	1.60455e-05	0.137683		1625
ILMN_1772743	-4.94009	1.11749e-06	1.60455e-05	0.176474	PIGK	1125	1
ILMN_1711124	4.93962	1.12007e-06	1.60725e-05	0.19668		2133
ILMN_1732516	-4.93782	1.12988e-06	1.62032e-05	0.159342	KNTC1	6718	12
ILMN_1660063	-4.93727	1.13293e-06	1.62368e-05	0.518004	POLE4	470	2
ILMN_1685122	4.93621	1.13874e-06	1.63099e-05	0.218808	COL9A2	2568	1
ILMN_1720373	4.93568	1.14168e-06	1.63332e-05	0.25599	SLC7A5	4391	16
ILMN_2086077	4.93566	1.14178e-06	1.63332e-05	0.0798855	JUNB	1276	19
ILMN_1798458	4.93471	1.14706e-06	1.63985e-05	0.216827	KAZN	1646	1
ILMN_1801914	4.93389	1.15162e-06	1.64535e-05	0.0221337	SH3BP2	6822	4
ILMN_1713496	4.92837	1.18284e-06	1.6889e-05	0.128608	ST3GAL5	1875	2
ILMN_1673899	4.92813	1.18424e-06	1.68985e-05	0.230495	FAM57A	1808	17
ILMN_1658483	4.92366	1.21018e-06	1.72579e-05	0.222518	IL1A	2536	2
ILMN_1749338	-4.92293	1.21445e-06	1.73082e-05	0.204518	ANKRD29	1381	18
ILMN_1770245	-4.9219	1.22048e-06	1.73833e-05	0.270914	EPB41L5	5910	2
ILMN_1678922	-4.92053	1.22862e-06	1.74885e-05	0.15757	HERC4	3333	10
ILMN_1752741	-4.91946	1.23498e-06	1.75583e-05	0.228172	TRIM23	1742	5
ILMN_2365465	-4.91945	1.23505e-06	1.75583e-05	0.24227		1200
ILMN_1721138	4.91843	1.24117e-06	1.76345e-05	0.107991	GRPEL2	3819	5
ILMN_2057573	4.91815	1.24285e-06	1.76475e-05	0.14352	ESYT2	5761	7
ILMN_1772644	4.91743	1.24718e-06	1.7698e-05	0.255788	EML3	3201	11
ILMN_1669094	4.91557	1.25845e-06	1.78393e-05	0.210041	ZNF672	2769	1
ILMN_3306440	-4.91553	1.25869e-06	1.78393e-05	0.0851579	NEMP1	5028	12
ILMN_1770787	-4.91537	1.25967e-06	1.78422e-05	0.1344		986
ILMN_1682165	-4.9143	1.26623e-06	1.79241e-05	0.196566	CNNM2	3272	10
ILMN_2382309	-4.91379	1.26934e-06	1.79571e-05	0.639586		1011	14
ILMN_2170814	4.91305	1.27385e-06	1.8008e-05	0.317031	LAMP3	2965	3
ILMN_2396272	-4.91295	1.2745e-06	1.8008e-05	0.317578		3374
ILMN_1697812	-4.91249	1.27733e-06	1.8037e-05	0.138263	MNX1	1611	7
ILMN_1666633	-4.91216	1.27938e-06	1.80547e-05	0.115392	TAPT1-AS1	1570	4
ILMN_2366212	-4.91161	1.2828e-06	1.80919e-05	0.264646	CD79B	1214	17
ILMN_3229770	4.91058	1.28917e-06	1.81707e-05	0.209738	SKP1	2612	5
ILMN_2401618	-4.91009	1.29224e-06	1.82028e-05	0.138809	MLX	1291	17
ILMN_1651535	-4.90896	1.29928e-06	1.82908e-05	0.142889	TMEM217	782	6
ILMN_1788213	-4.90758	1.30797e-06	1.84018e-05	0.141004	FRAT2	1966	10
ILMN_1738099	4.90649	1.31488e-06	1.84867e-05	0.30515	CAMKMT	1194	2
ILMN_1803988	-4.90638	1.31561e-06	1.84867e-05	0.167189	MCL1	3686	1
ILMN_1701455	-4.90339	1.33473e-06	1.8744e-05	0.312729	FBXO6	1105	1
ILMN_1699931	-4.90241	1.34102e-06	1.88209e-05	0.208951	HCST	387	19
ILMN_1832672	-4.89966	1.35895e-06	1.9061e-05	0.003067		305
ILMN_1793724	4.89838	1.36735e-06	1.91671e-05	0.401681		1080
ILMN_2383964	4.89586	1.38406e-06	1.93895e-05	0.0797586	C14orf79	1155	14
ILMN_1667707	-4.8956	1.3858e-06	1.9402e-05	0.253019	SPCS3	1413	4
ILMN_2163723	4.8944	1.39385e-06	1.95028e-05	0.11982	KRT7	1408	12
ILMN_2355168	-4.89316	1.40214e-06	1.9607e-05	0.230822	MGST1	399	12
ILMN_1786606	4.89219	1.40872e-06	1.9687e-05	0.135913		2544
ILMN_1721605	-4.89195	1.41033e-06	1.96975e-05	0.322544		1203
ILMN_1900110	-4.89121	1.41542e-06	1.97567e-05	0.090531	IRS1	537	2
ILMN_1905548	-4.89015	1.42266e-06	1.98457e-05	0.252282	MBNL3	5006	X
ILMN_1781173	-4.88885	1.4316e-06	1.99583e-05	0.0870377	HDAC9	3023	7
ILMN_1806951	-4.88832	1.4352e-06	1.99965e-05	-0.0124526	CSTF3	309	11
ILMN_1706344	4.88686	1.4453e-06	2.0125e-05	0.301777	ABHD6	2009	3
ILMN_1809467	-4.88518	1.45706e-06	2.02765e-05	0.273441	VAMP5	332	2
ILMN_2220283	4.88498	1.45847e-06	2.02839e-05	0.441718		927
ILMN_1651347	4.88409	1.46469e-06	2.0358e-05	0.237111	SERTAD2	5345	2
ILMN_1801766	-4.88305	1.47206e-06	2.04481e-05	0.182999		999
ILMN_2089875	4.8814	1.48379e-06	2.05986e-05	0.204476	TNFSF4	3209	1
ILMN_1708841	-4.88006	1.49339e-06	2.07195e-05	0.25602	GOLPH3	2120	5
ILMN_1799299	-4.87499	1.53017e-06	2.1217e-05	0.216601	PRPF38B	2950	1
ILMN_1735930	-4.87379	1.53906e-06	2.13273e-05	0.157543	KLF2	1541	19
ILMN_1657395	-4.87357	1.54067e-06	2.13369e-05	0.0718444		3983
ILMN_2124951	-4.87294	1.54531e-06	2.13882e-05	0.319937		1285
ILMN_2381197	-4.87105	1.55942e-06	2.15613e-05	0.168123	RNF19A	3605	8
ILMN_1792837	-4.87101	1.55968e-06	2.15613e-05	0.13073	CIAO1	2753	2
ILMN_1688373	4.87056	1.56307e-06	2.15827e-05	0.365502		379
ILMN_1776516	4.87056	1.56311e-06	2.15827e-05	0.253562	ITPKA	1718	15
ILMN_1694268	-4.86822	1.5807e-06	2.18125e-05	0.179473	HES6	1233	2
ILMN_1670218	4.8676	1.58539e-06	2.18642e-05	0.194557		1629
ILMN_3230337	-4.86746	1.58649e-06	2.18662e-05	0.201423	PAXIP1-AS2	1537	7
ILMN_3251728	-4.86707	1.58948e-06	2.18943e-05	0.14676		4571
ILMN_1671568	4.86562	1.60055e-06	2.20336e-05	0.51607	ECHDC2	1051	1
ILMN_1699100	-4.86483	1.60661e-06	2.21033e-05	0.346332	SOAT1	2918	1
ILMN_3283458	4.86471	1.60753e-06	2.21033e-05	0.32437		246
ILMN_1752008	-4.86364	1.6158e-06	2.22038e-05	0.172747	OTUD1	2241	10
ILMN_1790909	-4.86338	1.6178e-06	2.2218e-05	0.205728	NFE2L2	1849	2
ILMN_1685156	-4.86145	1.63288e-06	2.24116e-05	0.11518		5594	12
ILMN_1709237	4.8609	1.63717e-06	2.24572e-05	0.513487	EPHX2	1786	8
ILMN_3236367	4.86022	1.6425e-06	2.25169e-05	0.152634	IFFO2	5487	1
ILMN_2067032	4.85968	1.64675e-06	2.25618e-05	0.117735	TRAF3IP1	2155	2
ILMN_3237507	-4.85893	1.65267e-06	2.26294e-05	0.225489	ATXN7L3B	3436	12
ILMN_1683065	-4.85716	1.66673e-06	2.28083e-05	0.185272	COA5	1423	2
ILMN_1742382	-4.85669	1.67048e-06	2.28461e-05	0.202843	RIMS3	7056	1
ILMN_2406410	4.85604	1.67569e-06	2.29038e-05	0.0329832	RHBDD2	1519	7
ILMN_1745655	4.85583	1.6774e-06	2.29136e-05	0.0642862	PEX16	1064	11
ILMN_2345353	4.8551	1.68322e-06	2.29794e-05	0.364295		330
ILMN_1781952	-4.85491	1.6848e-06	2.29874e-05	0.25025	MGST1	1	12
ILMN_1712046	-4.85374	1.69421e-06	2.3102e-05	0.221111	CPXM1	2235	20
ILMN_1651316	-4.85276	1.70221e-06	2.31973e-05	0.262318	CD69	1001	12
ILMN_1856315	-4.85157	1.71192e-06	2.33159e-05	0.0507714		1973
ILMN_1788053	4.85021	1.72309e-06	2.34542e-05	0.14674	SLC25A12	2654	2
ILMN_1655296	-4.84532	1.76387e-06	2.39952e-05	0.548689	UTRN	10292	6
ILMN_1673138	-4.84304	1.78317e-06	2.42434e-05	0.149255	ZBTB33	5036	X
ILMN_1804419	-4.84153	1.79604e-06	2.44039e-05	0.242384	LRMP	2498	12
ILMN_1760089	4.8414	1.79715e-06	2.44046e-05	0.525081		842
ILMN_3263290	4.83957	1.81296e-06	2.46048e-05	0.201857		910
ILMN_2077886	-4.83898	1.81801e-06	2.46466e-05	0.127585	C1orf109	1552	1
ILMN_3244114	4.83896	1.81818e-06	2.46466e-05	0.163719		1242
ILMN_1813091	4.83781	1.82825e-06	2.47589e-05	0.161744	ARL1	2750	12
ILMN_3237256	-4.83776	1.82862e-06	2.47589e-05	0.197881	BEND4	8281	4
ILMN_1704305	4.83763	1.82981e-06	2.47606e-05	-0.0102261	NIP7	1959	16
ILMN_1698406	-4.8337	1.8644e-06	2.52137e-05	0.2182	ORMDL1	760	2
ILMN_3237679	-4.83018	1.89597e-06	2.56257e-05	0.0741779	PTAR1	9811	9
ILMN_1663042	4.8287	1.9094e-06	2.57897e-05	0.0657147	SDC4	2207	20
ILMN_1782439	-4.82859	1.91035e-06	2.57897e-05	0.357516	CNN3	1856	1
ILMN_2387952	-4.82746	1.92071e-06	2.59143e-05	0.371599	FAM134B	3026	5
ILMN_1811957	4.8267	1.92769e-06	2.59933e-05	0.120249	CAMSAP1	5855	9
ILMN_1716563	4.82611	1.93311e-06	2.60512e-05	0.21525	PRKCB	2044	16
ILMN_1764827	-4.8258	1.93595e-06	2.60742e-05	0.216544	MRFAP1L1	620	4
ILMN_2048700	-4.82548	1.93884e-06	2.60979e-05	0.245908	ATAD2	4032	8
ILMN_1749253	-4.82466	1.94647e-06	2.61853e-05	0.165729	TUBD1	2328	17
ILMN_2339691	-4.8242	1.95073e-06	2.62273e-05	0.124019	SYVN1	2383	11
ILMN_1763842	4.82238	1.96771e-06	2.64402e-05	0.252502		432
ILMN_1766411	-4.82195	1.97176e-06	2.64697e-05	0.299071		1686
ILMN_1764596	-4.8219	1.97221e-06	2.64697e-05	0.134735	MPST	733	22
ILMN_1713832	4.81738	2.01506e-06	2.7029e-05	0.139241	RPS3	43	11
ILMN_2327795	-4.81565	2.03167e-06	2.7236e-05	0.177543	RERE	7778	1
ILMN_1735075	-4.8152	2.03601e-06	2.72782e-05	0.0533941	PGBD2	1704	1
ILMN_2138765	4.8148	2.03994e-06	2.73151e-05	0.405336	PLIN2	1495	9
ILMN_1759008	4.81465	2.04137e-06	2.73183e-05	0.323269	ZNF689	2592	16
ILMN_1772369	4.81416	2.04618e-06	2.73668e-05	0.217494	PDHA1	1300	X
ILMN_1667948	4.81283	2.05916e-06	2.75243e-05	0.116409	SPATA18	3974	4
ILMN_2388254	4.81212	2.0661e-06	2.76012e-05	0.196543	GCSAM	3275	3
ILMN_1791097	-4.81185	2.06869e-06	2.76197e-05	0.0684228	RSBN1	6337	1
ILMN_1821517	4.8117	2.07017e-06	2.76234e-05	0.462613		686
ILMN_1715613	4.8114	2.07319e-06	2.76477e-05	-0.0026661	TAOK2	2764	16
ILMN_1715569	-4.81085	2.07857e-06	2.76952e-05	0.266872		637
ILMN_3187357	4.81079	2.07915e-06	2.76952e-05	0.225085		1276
ILMN_1741507	-4.81	2.08693e-06	2.77827e-05	0.212227		2609	2
ILMN_2092041	-4.80927	2.09422e-06	2.78636e-05	0.26131	CYTIP	1926	2
ILMN_1778625	4.80843	2.10256e-06	2.79585e-05	0.129776	CD44	1114	11
ILMN_1756937	-4.80764	2.11045e-06	2.80472e-05	0.106332	ST8SIA4	5487	5
ILMN_1695311	4.8066	2.12097e-06	2.81707e-05	0.333509		1015
ILMN_1708006	-4.80631	2.1239e-06	2.81933e-05	0.283657		2255
ILMN_2057220	-4.80611	2.12584e-06	2.82029e-05	0.374904	RIDA	710	8
ILMN_1657955	4.80442	2.14296e-06	2.84137e-05	0.0859781	PRPF40B	10785	12
ILMN_1856533	-4.80418	2.14544e-06	2.84302e-05	0.10098		4537
ILMN_3237946	-4.80247	2.16288e-06	2.86448e-05	0.203204	PXDN	3568	2
ILMN_1691736	4.80191	2.16868e-06	2.86991e-05	0.143185	ST6GALNAC6	2128	9
ILMN_2344182	-4.80183	2.16947e-06	2.86991e-05	0.306769	TMTC4	2170	13
ILMN_1802355	-4.80134	2.1745e-06	2.87492e-05	0.163665	RBM18	582	9
ILMN_1719219	-4.80117	2.17624e-06	2.87555e-05	0.0365691	ZNF616	2799	19
ILMN_1690125	4.80016	2.18674e-06	2.88667e-05	0.224921	PDLIM7	915	5
ILMN_1770940	4.80012	2.18715e-06	2.88667e-05	0.189774	CDH1	4272	16
ILMN_1657769	4.79768	2.21253e-06	2.91848e-05	-0.0553878	EIF5	209	14
ILMN_3308310	4.79725	2.21705e-06	2.92277e-05	0.0703589	RPL3	4	22
ILMN_1800619	4.79686	2.22116e-06	2.92651e-05	0.133664		1040
ILMN_1702866	-4.7957	2.2334e-06	2.94096e-05	0.0624145		867
ILMN_1672366	-4.794	2.25152e-06	2.96313e-05	0.166114		865
ILMN_2121207	4.79222	2.27049e-06	2.98638e-05	0.243	MVB12A	1074	19
ILMN_1750661	4.79162	2.27694e-06	2.99316e-05	0.119687	FBXW9	1628	19
ILMN_1802338	-4.79026	2.29172e-06	3.01087e-05	0.209968	HHLA3	184	1
ILMN_1701413	4.78999	2.29461e-06	3.01296e-05	0.250585	PIGQ	2856	16
ILMN_1696962	-4.78633	2.33473e-06	3.06389e-05	0.256099	PDZD8	3743	10
ILMN_2193591	-4.78616	2.33653e-06	3.0645e-05	0.215814		2155
ILMN_1781028	4.7859	2.33944e-06	3.06657e-05	0.188139	ZMYM5	915	13
ILMN_1666902	4.78568	2.34183e-06	3.06796e-05	0.316673	ADGRG5	3601	16
ILMN_2316236	4.78536	2.34544e-06	3.07093e-05	0.312041	HOPX	590	4
ILMN_1696347	-4.78429	2.35728e-06	3.08469e-05	0.14424	CTSC	1345	11
ILMN_3222425	-4.7835	2.36618e-06	3.09457e-05	0.150081	UMAD1	398	7
ILMN_2383774	4.78319	2.36963e-06	3.09733e-05	0.192841	TRAF3	2055	14
ILMN_1772177	4.78239	2.37853e-06	3.1072e-05	0.0634626	ASCC3	214	6
ILMN_1726967	4.78083	2.39622e-06	3.12853e-05	0.326974	TWSG1	1592	18
ILMN_2145518	-4.78034	2.4017e-06	3.13392e-05	0.143201	TMEM126B	1036	11
ILMN_1728218	-4.77787	2.4299e-06	3.16892e-05	0.215509	RBPMS-AS1	666	8
ILMN_1655921	-4.77342	2.48148e-06	3.23344e-05	0.297764	GTF2E1	2492	3
ILMN_1735179	-4.77336	2.48218e-06	3.23344e-05	0.219325		1215	4
ILMN_1748884	-4.77272	2.48968e-06	3.24137e-05	0.0314065		4287
ILMN_2401978	4.77091	2.51108e-06	3.26739e-05	0.169766	STAT3	4418	17
ILMN_1665135	-4.76833	2.54181e-06	3.3055e-05	0.0418363	RBBP6	1503	16
ILMN_1671288	4.76779	2.54826e-06	3.31201e-05	-0.00749752		2247
ILMN_1733377	4.76737	2.55332e-06	3.31672e-05	0.243729	FASTKD5	2487	20
ILMN_2222317	-4.76672	2.56121e-06	3.3251e-05	0.125851	DNAJB4	1779	1
ILMN_1762231	-4.76579	2.57238e-06	3.33772e-05	0.237007	ZEB1	3600	10
ILMN_1655684	4.76469	2.58583e-06	3.35328e-05	0.369585	SARS2	1925	19
ILMN_1663486	-4.76418	2.59205e-06	3.35946e-05	0.220008		2960
ILMN_1736829	4.76359	2.5992e-06	3.36683e-05	0.153141	MDM2	1234	12
ILMN_1768449	4.76264	2.61093e-06	3.38003e-05	0.238102	PRPSAP1	1499	17
ILMN_2365569	4.76252	2.61233e-06	3.38003e-05	0.281306		1502
ILMN_1781536	4.76236	2.61435e-06	3.38074e-05	0.257644	FAH	1133	15
ILMN_3197097	4.76107	2.63022e-06	3.39937e-05	0.522525	TSTD1	140	1
ILMN_1663132	4.76032	2.63958e-06	3.40955e-05	0.243474	ADCK2	2165	7
ILMN_1791002	4.76008	2.64259e-06	3.41152e-05	0.123674	SKP2	1010	5
ILMN_1661673	4.75885	2.65784e-06	3.42929e-05	0.156437		150	5
ILMN_1911047	4.75825	2.66545e-06	3.43717e-05	0.249994	C17orf99	840	17
ILMN_1809437	4.75734	2.67679e-06	3.44986e-05	0.0224321	RHBDD2	1533	7
ILMN_3256004	-4.7567	2.68492e-06	3.45842e-05	0.211259		291
ILMN_1696463	-4.75601	2.69364e-06	3.4677e-05	0.417997	SPI1	1313	11
ILMN_1734734	4.75407	2.71829e-06	3.49748e-05	0.478869		29
ILMN_1758939	4.75205	2.74424e-06	3.5289e-05	0.262137	RIPK2	1669	8
ILMN_1693490	-4.75099	2.75793e-06	3.54452e-05	0.210183	SEC11A	1048	15
ILMN_1679322	-4.7507	2.76178e-06	3.5475e-05	0.368525	SH2D4A	2745	8
ILMN_1670901	4.74889	2.78533e-06	3.57574e-05	0.194495	COX10	2855	17
ILMN_1663035	-4.74809	2.7958e-06	3.58657e-05	0.165974	SREBF1	4022	17
ILMN_1743194	-4.74801	2.79687e-06	3.58657e-05	0.234164	EEA1	4334	12
ILMN_1658709	-4.74706	2.80939e-06	3.60062e-05	0.189365	LAMB1	5294	7
ILMN_2315694	4.7455	2.83004e-06	3.62506e-05	0.256151	STRADA	1994	17
ILMN_1812769	4.74468	2.84094e-06	3.63701e-05	0.202866	UBXN1	1147	11
ILMN_1849941	4.74369	2.85414e-06	3.65187e-05	0.19596	MAPK8	2125	10
ILMN_1806651	-4.74347	2.8571e-06	3.65363e-05	0.358963		156
ILMN_1698653	4.74197	2.87729e-06	3.67554e-05	0.165791	ODF2	2132	9
ILMN_2358278	-4.74196	2.87742e-06	3.67554e-05	0.113433	RSRC2	2027	12
ILMN_1803647	4.7412	2.88775e-06	3.68669e-05	0.399331	FAM162A	511	3
ILMN_1651719	-4.74086	2.89234e-06	3.69045e-05	0.106108	MBTPS1	3916	16
ILMN_2298261	-4.74075	2.89391e-06	3.69045e-05	-0.0113541	RBM3	549	X
ILMN_1726245	-4.7391	2.91632e-06	3.71698e-05	0.202155	TGFBR2	4202	3
ILMN_1672738	4.7387	2.92178e-06	3.72187e-05	0.230538		5
ILMN_1661424	-4.73805	2.93075e-06	3.73123e-05	0.237429	THAP6	3147	4
ILMN_1668442	4.7367	2.94937e-06	3.75287e-05	0.243441	LINC00158	1087	21
ILMN_1854241	-4.73506	2.97208e-06	3.77968e-05	0.141349		290
ILMN_2135272	-4.73373	2.99072e-06	3.80128e-05	0.381998	GIMAP2	1140	7
ILMN_1822571	-4.73301	3.00085e-06	3.81206e-05	0.127378		76
ILMN_1802082	-4.73218	3.01245e-06	3.82468e-05	0.265721	PRDM8	3771	4
ILMN_1697006	-4.72918	3.0551e-06	3.8767e-05	0.229774		1464
ILMN_1756806	-4.72799	3.07211e-06	3.89613e-05	0.129639	MCL1	870	1
ILMN_1679837	-4.72739	3.08076e-06	3.90496e-05	0.267046	SGPP1	1153	14
ILMN_1792508	-4.72573	3.1048e-06	3.93282e-05	0.17273	TMEM59	1502	1
ILMN_3247998	-4.72564	3.10616e-06	3.93282e-05	0.378805	STAP1	1148	4
ILMN_2388701	4.72521	3.11238e-06	3.93853e-05	0.131816	ST3GAL5	1595	2
ILMN_1702835	-4.72509	3.11415e-06	3.93861e-05	0.308272	SH3BGRL	1230	X
ILMN_1726769	-4.72445	3.12355e-06	3.94833e-05	0.375823	CNDP2	2458	18
ILMN_2043306	-4.72361	3.13583e-06	3.9614e-05	0.208813	EPB41L5	6110	2
ILMN_1765274	4.72351	3.13733e-06	3.9614e-05	0.438706	CAPN11	2601	6
ILMN_2162860	-4.72251	3.15196e-06	3.97768e-05	0.305601		4424
ILMN_1806601	4.72236	3.15421e-06	3.978e-05	0.127448	GRSF1	2500	4
ILMN_1682658	-4.72215	3.15724e-06	3.978e-05	0.129918	EPM2AIP1	5243	3
ILMN_1686989	4.72214	3.15739e-06	3.978e-05	0.235183	INSIG1	961	7
ILMN_1725170	4.72147	3.16732e-06	3.98833e-05	0.783089		5798
ILMN_3228688	4.71928	3.19992e-06	4.02718e-05	0.19424		736
ILMN_1685124	4.71852	3.21138e-06	4.03939e-05	0.232755	TCTN1	1807	12
ILMN_1781906	4.71831	3.21446e-06	4.04105e-05	0.227323	RBM17	2446	10
ILMN_1658437	4.71802	3.21883e-06	4.04262e-05	0.151691	SFXN4	1291	10
ILMN_1812721	-4.71799	3.21921e-06	4.04262e-05	0.267844		1031
ILMN_2353697	-4.71765	3.22433e-06	4.04685e-05	0.150257	HINFP	1707	11
ILMN_1754839	-4.71744	3.22751e-06	4.04862e-05	0.192415	DHX15	2481	4
ILMN_1767135	-4.71719	3.23129e-06	4.05116e-05	0.256646	SOS1	3844	2
ILMN_1661346	4.71294	3.29617e-06	4.13025e-05	0.453431		1395
ILMN_1768814	4.7124	3.30452e-06	4.13847e-05	0.184792		4798
ILMN_1785661	-4.71227	3.30641e-06	4.13859e-05	0.434623	ABHD17B	2812	9
ILMN_1728083	-4.71136	3.32048e-06	4.15394e-05	0.221794		2255
ILMN_1785570	-4.71071	3.3306e-06	4.16434e-05	0.102422		921
ILMN_1759818	4.7057	3.40938e-06	4.26053e-05	0.181033	SORL1	6071	11
ILMN_1750967	-4.70436	3.43072e-06	4.28487e-05	0.0978503	ZKSCAN3	2042	6
ILMN_1666444	-4.70356	3.44358e-06	4.2986e-05	0.243866		1375
ILMN_2311674	-4.70077	3.48869e-06	4.35255e-05	0.145769		5380	12
ILMN_1757230	-4.70052	3.49262e-06	4.35509e-05	0.00036793	ZNF250	1821	8
ILMN_2350607	4.70003	3.50076e-06	4.36208e-05	0.205631	NDUFAF5	811	20
ILMN_1877068	4.69995	3.50201e-06	4.36208e-05	0.153927	DERL2	1279	17
ILMN_2181892	4.69644	3.55966e-06	4.43149e-05	0.204388	BEX2	653	X
ILMN_1736015	4.69615	3.56449e-06	4.4351e-05	0.227473	JADE1	3339	4
ILMN_1666746	-4.69519	3.58041e-06	4.4525e-05	0.480347		2077
ILMN_1756525	-4.6923	3.62892e-06	4.5104e-05	0.168433	KLHL20	2926	1
ILMN_1767542	-4.69008	3.66655e-06	4.55471e-05	0.229912	THAP10	1719	15
ILMN_1723414	4.68989	3.66983e-06	4.55632e-05	0.230714		1847
ILMN_1850816	-4.68953	3.67594e-06	4.56146e-05	0.137289	ELF2	304	4
ILMN_1799860	-4.68862	3.69151e-06	4.57831e-05	0.19783	PIGM	1701	1
ILMN_1724762	-4.68833	3.69653e-06	4.58206e-05	0.194211	XKR6	724	8
ILMN_1749070	4.68795	3.70315e-06	4.58576e-05	0.617063		1277
ILMN_1658504	4.68793	3.70349e-06	4.58576e-05	0.195156		2444	11
ILMN_3244065	-4.68779	3.70591e-06	4.58628e-05	0.142915	C9orf69	2523	9
ILMN_1683827	4.68657	3.7269e-06	4.60979e-05	0.185614		2596
ILMN_1711314	-4.68205	3.80601e-06	4.7051e-05	0.203445		873
ILMN_1655077	-4.6806	3.83178e-06	4.73442e-05	0.225358	PRDM1	4952	6
ILMN_1678054	-4.68016	3.83964e-06	4.7416e-05	0.277209	TRIM21	1682	11
ILMN_1661359	4.67925	3.85587e-06	4.75908e-05	0.1605		228
ILMN_1792990	-4.67876	3.86457e-06	4.76727e-05	0.0748514	ZNF202	3691	11
ILMN_2129877	-4.67851	3.8691e-06	4.7703e-05	0.111363	PARP11	3813	12
ILMN_2411127	4.67812	3.87603e-06	4.77628e-05	0.509921	YBEY	650	21
ILMN_2066066	4.67715	3.89355e-06	4.79532e-05	0.23861		741
ILMN_1700144	-4.67385	3.95364e-06	4.86565e-05	0.0103483	ITGA10	4995	1
ILMN_1787509	-4.67378	3.95489e-06	4.86565e-05	0.151776	HELZ2	7329	20
ILMN_1652072	4.67338	3.96233e-06	4.87221e-05	0.120021	NIM1K	2063	5
ILMN_2152429	-4.66991	4.0264e-06	4.94835e-05	0.0907842	C12orf76	1563	12
ILMN_1673409	-4.66955	4.03314e-06	4.95398e-05	0.0285813	MIR503HG	1930	X
ILMN_1679194	-4.66897	4.04409e-06	4.96375e-05	0.7816		1441
ILMN_2372403	4.6689	4.0454e-06	4.96375e-05	0.294071	ALDH5A1	5056	6
ILMN_2079386	4.66855	4.05188e-06	4.96905e-05	0.188111	RPL22	1557	1
ILMN_1718558	-4.66731	4.07537e-06	4.99521e-05	0.13755	PARP12	3504	7
ILMN_1775937	4.66613	4.09761e-06	5.01979e-05	0.232452	DDB1	4163	11
ILMN_2202940	-4.66562	4.10732e-06	5.02727e-05	0.495302	CHPT1	1174	12
ILMN_1763540	4.66558	4.10808e-06	5.02727e-05	0.24829	PSME4	5963	2
ILMN_1667609	4.66476	4.12372e-06	5.04373e-05	0.290579	RPL13A	8	19
ILMN_1679921	-4.66414	4.13551e-06	5.05378e-05	0.295575		555
ILMN_1787256	-4.6641	4.13633e-06	5.05378e-05	0.153796		3536
ILMN_2044572	-4.6631	4.15554e-06	5.07457e-05	-0.016928		4204
ILMN_1801307	-4.66089	4.19822e-06	5.12396e-05	0.215458	TNFSF10	1317	3
ILMN_1716736	4.65991	4.21725e-06	5.14447e-05	0.101024	TIMMDC1	2481	3
ILMN_2055156	4.65964	4.22252e-06	5.14816e-05	0.256992	PAG1	10466	8
ILMN_1734184	4.65911	4.23293e-06	5.15813e-05	0.128899	PLBD2	2379	12
ILMN_1886655	4.6568	4.27832e-06	5.21068e-05	0.233206		384
ILMN_2160764	-4.65624	4.28947e-06	5.21814e-05	0.143294	HBP1	2539	7
ILMN_3255144	-4.65616	4.29107e-06	5.21814e-05	0.312087		2723	8
ILMN_1747184	-4.65615	4.29124e-06	5.21814e-05	0.147141	PUS7L	4021	12
ILMN_1668605	-4.65331	4.34794e-06	5.28429e-05	0.54898		926
ILMN_3177271	-4.65206	4.37321e-06	5.3122e-05	0.256784		226
ILMN_1651405	4.6519	4.37631e-06	5.31317e-05	0.0806981	BRD9	2763	5
ILMN_1746252	4.65124	4.38971e-06	5.32663e-05	0.207458		1322
ILMN_1782567	-4.65095	4.39552e-06	5.33087e-05	0.301564	GUCY1B3	1549	4
ILMN_3248781	-4.64932	4.42879e-06	5.3684e-05	0.424154		2138
ILMN_1808071	-4.64798	4.45635e-06	5.39706e-05	0.0656385	KIF14	6189	1
ILMN_1661589	4.64783	4.45931e-06	5.39706e-05	0.415258	CD151	75	11
ILMN_1787415	-4.64782	4.45947e-06	5.39706e-05	0.157819	SNX16	3083	8
ILMN_1705871	4.6458	4.50144e-06	5.44499e-05	0.0788703	DDHD2	2507	8
ILMN_2330112	-4.64421	4.53454e-06	5.48215e-05	0.163016	CNIH1	868	14
ILMN_1775677	4.64363	4.54667e-06	5.49393e-05	0.242825	TYSND1	2139	10
ILMN_2337931	4.64344	4.55069e-06	5.49591e-05	0.121738	CXCR5	2284	11
ILMN_3234615	4.64305	4.55884e-06	5.50286e-05	0.1691		198
ILMN_1709164	-4.64233	4.57387e-06	5.51811e-05	0.322541		3875
ILMN_2403852	4.64187	4.58369e-06	5.52706e-05	0.102248	CYTH1	2929	17
ILMN_2125017	4.64119	4.59811e-06	5.54156e-05	0.268827	TIGIT	1885	3
ILMN_1826531	-4.63628	4.70335e-06	5.66542e-05	0.206903	ATXN7L3B	3369	12
ILMN_1752793	-4.63559	4.71831e-06	5.68047e-05	0.26507	SAP18	1755	13
ILMN_1699015	-4.63513	4.72832e-06	5.68917e-05	0.126389		122
ILMN_1674817	4.63503	4.73047e-06	5.68917e-05	0.599255	C1orf115	2741	1
ILMN_2407082	-4.63442	4.74376e-06	5.70217e-05	0.302549	SELENOF	1166	1
ILMN_1746801	4.63429	4.74657e-06	5.70256e-05	0.133016	CGN	4934	1
ILMN_2146418	-4.63378	4.75765e-06	5.7129e-05	0.269837	CRIM1	3937	2
ILMN_2054607	-4.63343	4.76542e-06	5.71925e-05	0.638169	CYP4V2	4510	4
ILMN_1761911	-4.63204	4.7959e-06	5.75283e-05	0.296501	GORAB	1385	1
ILMN_1804569	-4.63168	4.80388e-06	5.75838e-05	0.280963	GAS2	1864	11
ILMN_1771862	-4.63153	4.80731e-06	5.75838e-05	0.216483	TXNDC11	2641	16
ILMN_1813379	4.6315	4.80802e-06	5.75838e-05	0.113558	TNFRSF9	1766	1
ILMN_1670970	-4.6313	4.81231e-06	5.76052e-05	0.183172	PPP3CA	3617	4
ILMN_1777322	-4.62986	4.84445e-06	5.79598e-05	0.14841	FAM91A1	2519	8
ILMN_2131381	-4.62872	4.86976e-06	5.82323e-05	0.26949	PDE3B	4158	11
ILMN_2296369	4.62815	4.88259e-06	5.83554e-05	0.174424		13
ILMN_2393046	-4.62746	4.89816e-06	5.85112e-05	0.053731	NHLRC3	3027	13
ILMN_1698001	-4.62724	4.90312e-06	5.854e-05	0.186481	NCK1	1414	3
ILMN_1796595	4.62692	4.91025e-06	5.85948e-05	0.351664		2524
ILMN_3244096	-4.62666	4.91609e-06	5.86157e-05	0.0829355	ZFC3H1	6669	12
ILMN_1785756	-4.62662	4.91709e-06	5.86157e-05	0.0990163	H2AFX	279	11
ILMN_2312709	4.62534	4.94622e-06	5.89325e-05	0.22454	LCMT1	1247	16
ILMN_1651346	4.6247	4.96075e-06	5.9075e-05	0.185797	TMED7-TICA	3376	5
ILMN_1660749	4.62422	4.97161e-06	5.91737e-05	0.244816		1797
ILMN_1811933	4.62317	4.99566e-06	5.94293e-05	0.379357		2276
ILMN_1709817	-4.62053	5.0567e-06	6.01244e-05	0.188343	SLC35A5	2686	3
ILMN_1762033	-4.62013	5.06592e-06	6.02029e-05	0.126443		3627
ILMN_2298365	4.61879	5.09723e-06	6.05438e-05	0.234011		231
ILMN_1656297	4.61759	5.12549e-06	6.0848e-05	0.545445		823
ILMN_2065822	-4.61683	5.1432e-06	6.10268e-05	0.114691		2002
ILMN_1709334	-4.61603	5.1623e-06	6.12219e-05	0.14719		1948	14
ILMN_2115862	4.61521	5.18157e-06	6.14188e-05	0.373955	ESPNL	4521	2
ILMN_2400219	4.61456	5.19714e-06	6.15717e-05	0.465857	SRI	1672	7
ILMN_1686097	-4.61385	5.21403e-06	6.17401e-05	0.160166	TOP2A	5377	17
ILMN_3195497	4.61359	5.22041e-06	6.17838e-05	0.22284		3159
ILMN_3228822	-4.61192	5.2604e-06	6.22251e-05	0.0505628	NEMP1	5268	12
ILMN_1775235	-4.61096	5.28375e-06	6.24626e-05	0.28427	AFF3	7943	2
ILMN_2403946	-4.61087	5.2859e-06	6.24626e-05	0.231367	FEZ2	1660	2
ILMN_2096405	-4.60791	5.35798e-06	6.32819e-05	0.0380474		4201
ILMN_1658884	-4.60766	5.36426e-06	6.33235e-05	0.15041	ATP11B	6561	3
ILMN_1768202	4.60574	5.41164e-06	6.38502e-05	0.239671	ANKRD24	3961	19
ILMN_1685112	4.60501	5.42977e-06	6.40312e-05	0.268052	TACO1	1354	17
ILMN_1702636	4.60351	5.4672e-06	6.44397e-05	0.387782	TUBB6	147	18
ILMN_1712718	4.60235	5.49637e-06	6.47504e-05	0.161922	BPNT1	1019	1
ILMN_1724811	4.60214	5.50153e-06	6.4778e-05	0.207357		2818
ILMN_3236021	-4.60133	5.52194e-06	6.49851e-05	0.223337		1677
ILMN_2199554	-4.60023	5.5499e-06	6.52807e-05	0.173397		2987
ILMN_2170813	4.59967	5.5641e-06	6.54144e-05	0.281506	LAMP3	2800	3
ILMN_1670079	-4.59946	5.56956e-06	6.54452e-05	0.363987	DAB1	1361	1
ILMN_1778684	4.59895	5.58256e-06	6.55605e-05	0.233724	BRE	1490	2
ILMN_1750511	4.59885	5.58507e-06	6.55605e-05	0.666746	NT5C3B	1256	17
ILMN_1675939	4.59831	5.59895e-06	6.56899e-05	0.309173	IFNGR1	1771	6
ILMN_1735762	4.59534	5.67553e-06	6.65545e-05	0.0253205	NPNT	4241	4
ILMN_1771987	-4.59504	5.68328e-06	6.65841e-05	0.213722	SLC44A2	3317	19
ILMN_1845157	-4.59502	5.68383e-06	6.65841e-05	0.147364		1408
ILMN_2333146	4.59431	5.70214e-06	6.67646e-05	0.207233	BCR	3149	22
ILMN_1747344	4.59087	5.79265e-06	6.77899e-05	0.268525		1466
ILMN_2060115	4.59008	5.81347e-06	6.7999e-05	0.158404	SORL1	6532	11
ILMN_1775573	-4.58994	5.81711e-06	6.8007e-05	0.0874271	DPY19L4	3818	8
ILMN_1756723	4.58868	5.85075e-06	6.83428e-05	0.203922	DPP7	244	9
ILMN_1815859	4.58864	5.85177e-06	6.83428e-05	0.143958	ERCC2	2183	19
ILMN_1765254	4.58836	5.85927e-06	6.83958e-05	0.0612953	ZNF655	748	7
ILMN_2329914	-4.58455	5.96215e-06	6.95614e-05	0.280967	SPRY1	2114	4
ILMN_1719627	-4.58383	5.98172e-06	6.97545e-05	0.358297		2300
ILMN_1736568	-4.58352	5.99015e-06	6.98174e-05	0.229446	CASP2	3294	7
ILMN_1813344	4.58326	5.99735e-06	6.98659e-05	0.157002	NDUFAF5	964	20
ILMN_1673586	4.58311	6.00133e-06	6.98769e-05	0.0140066	SLC6A6	4458	3
ILMN_2203544	-4.5824	6.02092e-06	7.00697e-05	0.554568		800
ILMN_3235657	-4.58188	6.0351e-06	7.01992e-05	0.11917		284
ILMN_1739154	4.58077	6.06594e-06	7.05186e-05	0.241406		1374
ILMN_1769082	-4.58067	6.06868e-06	7.05186e-05	0.144289	TXNDC5	195	6
ILMN_2157435	-4.58024	6.08041e-06	7.06192e-05	0.0857964	DYNLRB1	434	20
ILMN_1775268	4.58001	6.08685e-06	7.06584e-05	0.120867	HECW2	6706	2
ILMN_2200331	-4.57918	6.10998e-06	7.08911e-05	0.062792	H2AFX	914	11
ILMN_1798360	4.57875	6.12183e-06	7.09928e-05	0.271663	ACKR3	1890	2
ILMN_2206344	4.57652	6.18461e-06	7.16848e-05	0.225613		3596	10
ILMN_3243471	-4.57312	6.28095e-06	7.27649e-05	0.243053	CNPY2	1105	12
ILMN_3251137	-4.57182	6.3183e-06	7.31608e-05	0.626376	METTL21A	4231	2
ILMN_2131336	-4.57094	6.34359e-06	7.34167e-05	0.0817141	NEMP1	4851	12
ILMN_3275580	-4.57037	6.36017e-06	7.35716e-05	0.0986689	ZCCHC18	1350	X
ILMN_1688780	4.56996	6.37202e-06	7.36717e-05	0.230229	S100A4	2	1
ILMN_1731001	-4.56951	6.38501e-06	7.37848e-05	0.212111		1298
ILMN_1798706	4.56939	6.38872e-06	7.37907e-05	0.353103	GPR183	1092	13
ILMN_2410742	-4.56861	6.4112e-06	7.40131e-05	0.212759		7656
ILMN_1732923	-4.56847	6.41527e-06	7.4023e-05	0.217118	SIPA1L2	6339	1
ILMN_1786759	-4.56825	6.4218e-06	7.40279e-05	0.309358		228
ILMN_3275575	4.56824	6.42212e-06	7.40279e-05	0.368837		367
[truncated: 21,033 more rows]

## Sheet: Supplementary Table 2 GO all
Supplementary Table 2. Gene ontology enrichment analysis using all genes ranked by P-value. Processes with P<3.80E-6 are indicated in bold.
GO Term	Description	P-value	FDR q-value	Enrichment	N	B	n	b	Genes
GO:0002376	immune system process	3.03e-09	3.98e-05	1.54	9576	1149	998	185	[NCF2 - neutrophil cytosolic factor 2, SIRPA - signal-regulatory protein alpha, TSC1 - tuberous sclerosis 1, PLAC8 - placenta-specific 8, CIITA - class ii, major histocompatibility complex, transactivator, F11R - f11 receptor, CD83 - cd83 molecule, MUC19 - mucin 19, oligomeric, EBI3 - epstein-barr virus induced 3, GEM - gtp binding protein overexpressed in skeletal muscle, ABL1 - c-abl oncogene 1…
GO:0006952	defense response	1.81e-07	0.00119	1.76	9576	509	1013	95	[NCF2 - neutrophil cytosolic factor 2, IFIT2 - interferon-induced protein with tetratricopeptide repeats 2, PLAC8 - placenta-specific 8, HIST2H2BE - histone cluster 2, h2be, SYK - spleen tyrosine kinase, F11R - f11 receptor, CD83 - cd83 molecule, HMGB3 - high mobility group box 3, SIGLEC14 - sialic acid binding ig-like lectin 14, IL23A - interleukin 23, alpha subunit p19, IFNAR1 - interferon (alp…
GO:0002684	positive regulation of immune system process	5.65e-07	0.00248	1.98	9576	507	629	66	[CMTM3 - cklf-like marvel transmembrane domain containing 3, SYK - spleen tyrosine kinase, CD83 - cd83 molecule, MUC19 - mucin 19, oligomeric, EBI3 - epstein-barr virus induced 3, IL23A - interleukin 23, alpha subunit p19, ABL1 - c-abl oncogene 1, non-receptor tyrosine kinase, GAB2 - grb2-associated binding protein 2, CASP8 - caspase 8, apoptosis-related cysteine peptidase, KCNN4 - potassium inte…
GO:0019221	cytokine-mediated signaling pathway	6.76e-07	0.00222	2.1	9576	260	945	54	[IFIT2 - interferon-induced protein with tetratricopeptide repeats 2, CIITA - class ii, major histocompatibility complex, transactivator, EBI3 - epstein-barr virus induced 3, IFNAR1 - interferon (alpha, beta and omega) receptor 1, CD74 - cd74 molecule, major histocompatibility complex, class ii invariant chain, PYCARD - pyd and card domain containing, AIM2 - absent in melanoma 2, TRIM5 - triparti…
GO:0006955	immune response	7.01e-07	0.00184	1.79	9576	450	985	83	[NCF2 - neutrophil cytosolic factor 2, TSC1 - tuberous sclerosis 1, HIST2H2BE - histone cluster 2, h2be, SYK - spleen tyrosine kinase, CIITA - class ii, major histocompatibility complex, transactivator, CD83 - cd83 molecule, HMGB3 - high mobility group box 3, EBI3 - epstein-barr virus induced 3, SIGLEC14 - sialic acid binding ig-like lectin 14, GEM - gtp binding protein overexpressed in skeletal …
GO:0045321	leukocyte activation	3.67e-06	0.00804	1.88	9576	520	646	66	[SIRPA - signal-regulatory protein alpha, PLAC8 - placenta-specific 8, TSC1 - tuberous sclerosis 1, SYK - spleen tyrosine kinase, FUCA1 - fucosidase, alpha-l- 1, tissue, EBI3 - epstein-barr virus induced 3, SIGLEC14 - sialic acid binding ig-like lectin 14, IL23A - interleukin 23, alpha subunit p19, ABL1 - c-abl oncogene 1, non-receptor tyrosine kinase, TLR1 - toll-like receptor 1, CASP8 - caspase…
GO:0050778	positive regulation of immune response	7.29e-06	0.0137	2.07	9576	352	645	49	[CMTM3 - cklf-like marvel transmembrane domain containing 3, SYK - spleen tyrosine kinase, MUC19 - mucin 19, oligomeric, IL23A - interleukin 23, alpha subunit p19, ABL1 - c-abl oncogene 1, non-receptor tyrosine kinase, GAB2 - grb2-associated binding protein 2, CASP8 - caspase 8, apoptosis-related cysteine peptidase, TLR1 - toll-like receptor 1, KCNN4 - potassium intermediate/small conductance cal…
GO:0001775	cell activation	1.15e-05	0.0189	1.78	9576	590	646	71	[SIRPA - signal-regulatory protein alpha, PLAC8 - placenta-specific 8, TSC1 - tuberous sclerosis 1, SYK - spleen tyrosine kinase, FUCA1 - fucosidase, alpha-l- 1, tissue, EBI3 - epstein-barr virus induced 3, SIGLEC14 - sialic acid binding ig-like lectin 14, IL23A - interleukin 23, alpha subunit p19, ABL1 - c-abl oncogene 1, non-receptor tyrosine kinase, TLR1 - toll-like receptor 1, CASP8 - caspase…
GO:0000183	chromatin silencing at rDNA	1.9e-05	0.0277	10.16	9576	20	330	7	[HIST1H3D - histone cluster 1, h3d, HIST1H3E - histone cluster 1, h3e, HIST1H4E - histone cluster 1, h4e, HIST1H4H - histone cluster 1, h4h, HIST1H3G - histone cluster 1, h3g, H3F3B - h3 histone, family 3b (h3.3b), HIST1H3H - histone cluster 1, h3h]
GO:0002682	regulation of immune system process	2.29e-05	0.03	1.67	9576	746	629	82	[CMTM3 - cklf-like marvel transmembrane domain containing 3, CLEC2D - c-type lectin domain family 2, member d, SYK - spleen tyrosine kinase, P4HTM - prolyl 4-hydroxylase, transmembrane (endoplasmic reticulum), GPR55 - g protein-coupled receptor 55, CD83 - cd83 molecule, MUC19 - mucin 19, oligomeric, EBI3 - epstein-barr virus induced 3, IL23A - interleukin 23, alpha subunit p19, ABL1 - c-abl oncog…
GO:0071345	cellular response to cytokine stimulus	3.07e-05	0.0367	3.25	9576	146	383	19	[ITGA4 - integrin, alpha 4 (antigen cd49d, alpha 4 subunit of vla-4 receptor), EIF4A2 - eukaryotic translation initiation factor 4a2, CCR7 - chemokine (c-c motif) receptor 7, RPL13A - ribosomal protein l13a, CD40 - cd40 molecule, tnf receptor superfamily member 5, TNFRSF21 - tumor necrosis factor receptor superfamily, member 21, TCF7 - transcription factor 7 (t-cell specific, hmg-box), NFIL3 - nu…
GO:0006954	inflammatory response	3.62e-05	0.0396	1.99	9576	209	1013	44	[ICAM1 - intercellular adhesion molecule 1, CCR7 - chemokine (c-c motif) receptor 7, SYK - spleen tyrosine kinase, F11R - f11 receptor, STAT3 - signal transducer and activator of transcription 3 (acute-phase response factor), CCR3 - chemokine (c-c motif) receptor 3, IL23A - interleukin 23, alpha subunit p19, TNFRSF21 - tumor necrosis factor receptor superfamily, member 21, TNFRSF4 - tumor necrosi…
GO:0046651	lymphocyte proliferation	5.01e-05	0.0507	4.29	9576	48	604	13	[EBI3 - epstein-barr virus induced 3, CD40 - cd40 molecule, tnf receptor superfamily member 5, TNFRSF4 - tumor necrosis factor receptor superfamily, member 4, IL23A - interleukin 23, alpha subunit p19, ABL1 - c-abl oncogene 1, non-receptor tyrosine kinase, GAPT - grb2-binding adaptor protein, transmembrane, SATB1 - satb homeobox 1, BCL2 - b-cell cll/lymphoma 2, CD86 - cd86 molecule, PLCL2 - phosp…
GO:0002252	immune effector process	5.63e-05	0.0528	1.76	9576	540	646	64	[SIRPA - signal-regulatory protein alpha, PLAC8 - placenta-specific 8, TSC1 - tuberous sclerosis 1, SYK - spleen tyrosine kinase, FUCA1 - fucosidase, alpha-l- 1, tissue, SIGLEC14 - sialic acid binding ig-like lectin 14, IL23A - interleukin 23, alpha subunit p19, ABL1 - c-abl oncogene 1, non-receptor tyrosine kinase, IFI44L - interferon-induced protein 44-like, CECR1 - cat eye syndrome chromosome …
GO:0050776	regulation of immune response	5.99e-05	0.0525	1.8	9576	499	629	59	[CMTM3 - cklf-like marvel transmembrane domain containing 3, CLEC2D - c-type lectin domain family 2, member d, SYK - spleen tyrosine kinase, MUC19 - mucin 19, oligomeric, IL23A - interleukin 23, alpha subunit p19, ABL1 - c-abl oncogene 1, non-receptor tyrosine kinase, GAB2 - grb2-associated binding protein 2, CASP8 - caspase 8, apoptosis-related cysteine peptidase, KCNN4 - potassium intermediate/…
GO:0032943	mononuclear cell proliferation	6.58e-05	0.054	4.21	9576	49	604	13	[EBI3 - epstein-barr virus induced 3, CD40 - cd40 molecule, tnf receptor superfamily member 5, IL23A - interleukin 23, alpha subunit p19, TNFRSF4 - tumor necrosis factor receptor superfamily, member 4, ABL1 - c-abl oncogene 1, non-receptor tyrosine kinase, GAPT - grb2-binding adaptor protein, transmembrane, SATB1 - satb homeobox 1, BCL2 - b-cell cll/lymphoma 2, CD86 - cd86 molecule, PLCL2 - phosp…
GO:0032946	positive regulation of mononuclear cell proliferation	7.42e-05	0.0574	3.8	9576	79	478	15	[CD38 - cd38 molecule, SYK - spleen tyrosine kinase, EBI3 - epstein-barr virus induced 3, NCK2 - nck adaptor protein 2, CD40 - cd40 molecule, tnf receptor superfamily member 5, IL1B - interleukin 1, beta, IL23A - interleukin 23, alpha subunit p19, TNFRSF4 - tumor necrosis factor receptor superfamily, member 4, CLCF1 - cardiotrophin-like cytokine factor 1, BCL2 - b-cell cll/lymphoma 2, ADA - adeno…
GO:0050671	positive regulation of lymphocyte proliferation	7.42e-05	0.0542	3.8	9576	79	478	15	[CD38 - cd38 molecule, SYK - spleen tyrosine kinase, EBI3 - epstein-barr virus induced 3, NCK2 - nck adaptor protein 2, CD40 - cd40 molecule, tnf receptor superfamily member 5, IL1B - interleukin 1, beta, IL23A - interleukin 23, alpha subunit p19, TNFRSF4 - tumor necrosis factor receptor superfamily, member 4, CLCF1 - cardiotrophin-like cytokine factor 1, BCL2 - b-cell cll/lymphoma 2, ADA - adeno…
GO:0050702	interleukin-1 beta secretion	8.25e-05	0.0571	154.45	9576	2	62	2	[TLR6 - toll-like receptor 6, AIM2 - absent in melanoma 2]
GO:0098542	defense response to other organism	8.38e-05	0.0551	2.28	9576	191	683	31	[PLAC8 - placenta-specific 8, BATF - basic leucine zipper transcription factor, atf-like, SYK - spleen tyrosine kinase, HIST2H2BE - histone cluster 2, h2be, STAT2 - signal transducer and activator of transcription 2, 113kda, ISG20 - interferon stimulated exonuclease gene 20kda, IL23A - interleukin 23, alpha subunit p19, ISG15 - isg15 ubiquitin-like modifier, TLR1 - toll-like receptor 1, IFI44L - …
GO:0046649	lymphocyte activation	8.93e-05	0.0559	2.27	9576	204	640	31	[ITGA4 - integrin, alpha 4 (antigen cd49d, alpha 4 subunit of vla-4 receptor), TSC1 - tuberous sclerosis 1, BATF - basic leucine zipper transcription factor, atf-like, TPD52 - tumor protein d52, NCK2 - nck adaptor protein 2, EBI3 - epstein-barr virus induced 3, IL23A - interleukin 23, alpha subunit p19, EGR1 - early growth response 1, TNFRSF4 - tumor necrosis factor receptor superfamily, member 4…
GO:0001954	positive regulation of cell-matrix adhesion	9.54e-05	0.057	26.6	9576	24	60	4	[CCR7 - chemokine (c-c motif) receptor 7, TSC1 - tuberous sclerosis 1, GSK3B - glycogen synthase kinase 3 beta, NINJ1 - ninjurin 1]
GO:0042113	B cell activation	9.76e-05	0.0557	2.59	9576	89	998	24	[ITGA4 - integrin, alpha 4 (antigen cd49d, alpha 4 subunit of vla-4 receptor), BATF - basic leucine zipper transcription factor, atf-like, DOCK11 - dedicator of cytokinesis 11, TPD52 - tumor protein d52, CD40 - cd40 molecule, tnf receptor superfamily member 5, CLCF1 - cardiotrophin-like cytokine factor 1, SWAP70 - swap switching b-cell complex 70kda subunit, PIK3CD - phosphatidylinositol-4,5-bisp…
GO:0046085	adenosine metabolic process	9.91e-05	0.0543	17.88	9576	6	357	4	[NT5E - 5'-nucleotidase, ecto (cd73), ADA - adenosine deaminase, ACPP - acid phosphatase, prostate, CECR1 - cat eye syndrome chromosome region, candidate 1]
GO:0070665	positive regulation of leukocyte proliferation	0.000101	0.053	3.71	9576	81	478	15	[CD38 - cd38 molecule, SYK - spleen tyrosine kinase, EBI3 - epstein-barr virus induced 3, NCK2 - nck adaptor protein 2, CD40 - cd40 molecule, tnf receptor superfamily member 5, IL1B - interleukin 1, beta, IL23A - interleukin 23, alpha subunit p19, TNFRSF4 - tumor necrosis factor receptor superfamily, member 4, CLCF1 - cardiotrophin-like cytokine factor 1, BCL2 - b-cell cll/lymphoma 2, ADA - adeno…
GO:0070661	leukocyte proliferation	0.000101	0.0512	4.04	9576	51	604	13	[EBI3 - epstein-barr virus induced 3, CD40 - cd40 molecule, tnf receptor superfamily member 5, IL23A - interleukin 23, alpha subunit p19, TNFRSF4 - tumor necrosis factor receptor superfamily, member 4, ABL1 - c-abl oncogene 1, non-receptor tyrosine kinase, GAPT - grb2-binding adaptor protein, transmembrane, SATB1 - satb homeobox 1, BCL2 - b-cell cll/lymphoma 2, CD86 - cd86 molecule, PLCL2 - phosp…
GO:1990384	hyaloid vascular plexus regression	0.000104	0.0508	9576	9576	1	1	1	[NINJ1 - ninjurin 1]
GO:0051290	protein heterotetramerization	0.000108	0.0506	8.13	9576	25	330	7	[HIST1H3D - histone cluster 1, h3d, HIST1H3E - histone cluster 1, h3e, HIST1H4E - histone cluster 1, h4e, ANXA2 - annexin a2, HIST1H4H - histone cluster 1, h4h, HIST1H3G - histone cluster 1, h3g, HIST1H3H - histone cluster 1, h3h]
GO:0034723	DNA replication-dependent nucleosome organization	0.000133	0.0604	9.67	9576	18	330	6	[HIST1H3D - histone cluster 1, h3d, HIST1H3E - histone cluster 1, h3e, HIST1H4E - histone cluster 1, h4e, HIST1H4H - histone cluster 1, h4h, HIST1H3G - histone cluster 1, h3g, HIST1H3H - histone cluster 1, h3h]
GO:0006335	DNA replication-dependent nucleosome assembly	0.000133	0.0584	9.67	9576	18	330	6	[HIST1H3D - histone cluster 1, h3d, HIST1H3E - histone cluster 1, h3e, HIST1H4E - histone cluster 1, h4e, HIST1H4H - histone cluster 1, h4h, HIST1H3G - histone cluster 1, h3g, HIST1H3H - histone cluster 1, h3h]
GO:0006407	rRNA export from nucleus	0.000134	0.057	121.22	9576	2	79	2	[RPSA - ribosomal protein sa, TSC1 - tuberous sclerosis 1]
GO:0006334	nucleosome assembly	0.000137	0.0565	4.46	9576	78	330	12	[HIST1H3D - histone cluster 1, h3d, HIST1H2BD - histone cluster 1, h2bd, HIST1H3E - histone cluster 1, h3e, HIST1H4E - histone cluster 1, h4e, HIST1H4H - histone cluster 1, h4h, HIST2H2BE - histone cluster 2, h2be, HIST1H2BJ - histone cluster 1, h2bj, HIST1H1C - histone cluster 1, h1c, HIST1H2BH - histone cluster 1, h2bh, HIST1H3G - histone cluster 1, h3g, H3F3B - h3 histone, family 3b (h3.3b), H…
GO:2000009	negative regulation of protein localization to cell surface	0.000141	0.056	10.69	9576	8	560	5	[LEPROTL1 - leptin receptor overlapping transcript-like 1, ASTN2 - astrotactin 2, NEDD4L - neural precursor cell expressed, developmentally down-regulated 4-like, e3 ubiquitin protein ligase, COMMD1 - copper metabolism (murr1) domain containing 1, TAX1BP3 - tax1 (human t-cell leukemia virus type i) binding protein 3]
GO:0042098	T cell proliferation	0.000157	0.0606	6.12	9576	23	544	8	[TNFRSF4 - tumor necrosis factor receptor superfamily, member 4, IL23A - interleukin 23, alpha subunit p19, ABL1 - c-abl oncogene 1, non-receptor tyrosine kinase, SATB1 - satb homeobox 1, EBI3 - epstein-barr virus induced 3, CD86 - cd86 molecule, BTN3A1 - butyrophilin, subfamily 3, member a1, DOCK8 - dedicator of cytokinesis 8]
GO:0060749	mammary gland alveolus development	0.000158	0.0592	212.8	9576	9	10	2	[CCND1 - cyclin d1, PHB2 - prohibitin 2]
GO:0006342	chromatin silencing	0.000179	0.0655	5.68	9576	46	330	9	[HIST1H3D - histone cluster 1, h3d, HIST1H3E - histone cluster 1, h3e, HIST1H4E - histone cluster 1, h4e, HIST1H4H - histone cluster 1, h4h, HIST1H2AC - histone cluster 1, h2ac, HIST1H3G - histone cluster 1, h3g, H3F3B - h3 histone, family 3b (h3.3b), HIST1H3H - histone cluster 1, h3h, H2AFJ - h2a histone family, member j]
GO:0034097	response to cytokine	0.000207	0.0735	1.84	9576	237	1012	46	[IFIT2 - interferon-induced protein with tetratricopeptide repeats 2, ITGA4 - integrin, alpha 4 (antigen cd49d, alpha 4 subunit of vla-4 receptor), ICAM1 - intercellular adhesion molecule 1, CCR7 - chemokine (c-c motif) receptor 7, CIITA - class ii, major histocompatibility complex, transactivator, RPL13A - ribosomal protein l13a, JUNB - jun b proto-oncogene, KLF2 - kruppel-like factor 2 (lung), …
GO:0045815	positive regulation of gene expression, epigenetic	0.000226	0.0782	5	9576	58	330	10	[HIST1H3D - histone cluster 1, h3d, TAF1A - tata box binding protein (tbp)-associated factor, rna polymerase i, a, 48kda, CD3EAP - cd3e molecule, epsilon associated protein, HIST1H3E - histone cluster 1, h3e, HIST1H4E - histone cluster 1, h4e, HIST1H4H - histone cluster 1, h4h, POLR1E - polymerase (rna) i polypeptide e, 53kda, HIST1H3G - histone cluster 1, h3g, H3F3B - h3 histone, family 3b (h3.3…
GO:0050701	interleukin-1 secretion	0.000237	0.0798	102.97	9576	3	62	2	[TLR6 - toll-like receptor 6, AIM2 - absent in melanoma 2]
GO:0016266	O-glycan processing	0.000238	0.0782	4.1	9576	30	857	11	[ST6GAL1 - st6 beta-galactosamide alpha-2,6-sialyltranferase 1, GCNT1 - glucosaminyl (n-acetyl) transferase 1, core 2, GCNT3 - glucosaminyl (n-acetyl) transferase 3, mucin type, ST3GAL3 - st3 beta-galactoside alpha-2,3-sialyltransferase 3, ST3GAL2 - st3 beta-galactoside alpha-2,3-sialyltransferase 2, ST3GAL1 - st3 beta-galactoside alpha-2,3-sialyltransferase 1, POFUT1 - protein o-fucosyltransfera…
GO:0050691	regulation of defense response to virus by host	0.000244	0.0784	44.13	9576	21	31	3	[IL23A - interleukin 23, alpha subunit p19, RNF216 - ring finger protein 216, AIM2 - absent in melanoma 2]
GO:0009617	response to bacterium	0.000256	0.0802	10.2	9576	88	64	6	[IL23A - interleukin 23, alpha subunit p19, LEAP2 - liver expressed antimicrobial peptide 2, HIST1H2BJ - histone cluster 1, h2bj, BAIAP2L1 - bai1-associated protein 2-like 1, TLR6 - toll-like receptor 6, CCL20 - chemokine (c-c motif) ligand 20]
GO:0032944	regulation of mononuclear cell proliferation	0.000271	0.0828	3.03	9576	119	478	18	[CD38 - cd38 molecule, SYK - spleen tyrosine kinase, NCK2 - nck adaptor protein 2, EBI3 - epstein-barr virus induced 3, IL1B - interleukin 1, beta, CD40 - cd40 molecule, tnf receptor superfamily member 5, TNFRSF4 - tumor necrosis factor receptor superfamily, member 4, TNFRSF21 - tumor necrosis factor receptor superfamily, member 21, IL23A - interleukin 23, alpha subunit p19, CLCF1 - cardiotrophin…
GO:0050670	regulation of lymphocyte proliferation	0.000271	0.0809	3.03	9576	119	478	18	[CD38 - cd38 molecule, SYK - spleen tyrosine kinase, NCK2 - nck adaptor protein 2, EBI3 - epstein-barr virus induced 3, CD40 - cd40 molecule, tnf receptor superfamily member 5, IL1B - interleukin 1, beta, TNFRSF4 - tumor necrosis factor receptor superfamily, member 4, TNFRSF21 - tumor necrosis factor receptor superfamily, member 21, IL23A - interleukin 23, alpha subunit p19, CLCF1 - cardiotrophin…
GO:0048619	embryonic hindgut morphogenesis	0.000291	0.085	82.55	9576	2	116	2	[TCF7 - transcription factor 7 (t-cell specific, hmg-box), DACT1 - dishevelled-binding antagonist of beta-catenin 1]
GO:0043207	response to external biotic stimulus	0.000367	0.105	1.65	9576	386	950	63	[IFIT2 - interferon-induced protein with tetratricopeptide repeats 2, GFI1 - growth factor independent 1 transcription repressor, PLAC8 - placenta-specific 8, HIST2H2BE - histone cluster 2, h2be, SYK - spleen tyrosine kinase, IL23A - interleukin 23, alpha subunit p19, IFNAR1 - interferon (alpha, beta and omega) receptor 1, ABL1 - c-abl oncogene 1, non-receptor tyrosine kinase, TLR1 - toll-like re…
GO:0033599	regulation of mammary gland epithelial cell proliferation	0.000368	0.103	147.32	9576	13	10	2	[CCND1 - cyclin d1, PHB2 - prohibitin 2]
GO:0070663	regulation of leukocyte proliferation	0.000372	0.102	2.96	9576	122	478	18	[CD38 - cd38 molecule, SYK - spleen tyrosine kinase, NCK2 - nck adaptor protein 2, EBI3 - epstein-barr virus induced 3, IL1B - interleukin 1, beta, CD40 - cd40 molecule, tnf receptor superfamily member 5, TNFRSF4 - tumor necrosis factor receptor superfamily, member 4, TNFRSF21 - tumor necrosis factor receptor superfamily, member 21, IL23A - interleukin 23, alpha subunit p19, CLCF1 - cardiotrophin…
GO:0010874	regulation of cholesterol efflux	0.000374	0.1	14.88	9576	9	286	4	[NFKBIA - nuclear factor of kappa light polypeptide gene enhancer in b-cells inhibitor, alpha, CETP - cholesteryl ester transfer protein, plasma, ABCG1 - atp-binding cassette, sub-family g (white), member 1, PLTP - phospholipid transfer protein]
GO:0032370	positive regulation of lipid transport	0.000405	0.106	6.64	9576	27	374	7	[ANXA2 - annexin a2, ATP8A1 - atpase, aminophospholipid transporter (aplt), class i, type 8a, member 1, NFKBIA - nuclear factor of kappa light polypeptide gene enhancer in b-cells inhibitor, alpha, IL1B - interleukin 1, beta, ABCG1 - atp-binding cassette, sub-family g (white), member 1, BMP6 - bone morphogenetic protein 6, PLTP - phospholipid transfer protein]
GO:0034655	nucleobase-containing compound catabolic process	0.000424	0.109	2.43	9576	215	421	23	[EIF4A1 - eukaryotic translation initiation factor 4a1, RPSA - ribosomal protein sa, PDE9A - phosphodiesterase 9a, EIF4A2 - eukaryotic translation initiation factor 4a2, MAGOHB - mago-nashi homolog b (drosophila), NT5E - 5'-nucleotidase, ecto (cd73), RPS2 - ribosomal protein s2, ISG20 - interferon stimulated exonuclease gene 20kda, RPL13A - ribosomal protein l13a, CNOT6L - ccr4-not transcription …
GO:0051239	regulation of multicellular organismal process	0.000428	0.108	1.38	9576	1422	647	133	[CTTN - cortactin, TSC1 - tuberous sclerosis 1, CASZ1 - castor zinc finger 1, PLAC8 - placenta-specific 8, CIITA - class ii, major histocompatibility complex, transactivator, GPR55 - g protein-coupled receptor 55, F11R - f11 receptor, CD83 - cd83 molecule, FAM46A - family with sequence similarity 46, member a, EBI3 - epstein-barr virus induced 3, ABL1 - c-abl oncogene 1, non-receptor tyrosine kin…
GO:0030155	regulation of cell adhesion	0.000454	0.113	1.95	9576	377	496	38	[ITGA4 - integrin, alpha 4 (antigen cd49d, alpha 4 subunit of vla-4 receptor), CRKL - v-crk avian sarcoma virus ct10 oncogene homolog-like, CCR7 - chemokine (c-c motif) receptor 7, BCAS3 - breast carcinoma amplified sequence 3, TSC1 - tuberous sclerosis 1, SYK - spleen tyrosine kinase, CD83 - cd83 molecule, NCK2 - nck adaptor protein 2, EBI3 - epstein-barr virus induced 3, CYTIP - cytohesin 1 int…
GO:0001817	regulation of cytokine production	0.000458	0.111	1.77	9576	357	743	49	[SYK - spleen tyrosine kinase, F11R - f11 receptor, CD83 - cd83 molecule, EBI3 - epstein-barr virus induced 3, IL23A - interleukin 23, alpha subunit p19, ABL1 - c-abl oncogene 1, non-receptor tyrosine kinase, ATF4 - activating transcription factor 4, REL - v-rel avian reticuloendotheliosis viral oncogene homolog, TLR1 - toll-like receptor 1, RNF216 - ring finger protein 216, AIM2 - absent in mela…
GO:0046700	heterocycle catabolic process	0.000477	0.114	2.37	9576	230	421	24	[EIF4A1 - eukaryotic translation initiation factor 4a1, RPSA - ribosomal protein sa, PDE9A - phosphodiesterase 9a, EIF4A2 - eukaryotic translation initiation factor 4a2, MAGOHB - mago-nashi homolog b (drosophila), NT5E - 5'-nucleotidase, ecto (cd73), RPS2 - ribosomal protein s2, ISG20 - interferon stimulated exonuclease gene 20kda, RPL13A - ribosomal protein l13a, CNOT6L - ccr4-not transcription …
GO:0001819	positive regulation of cytokine production	0.000482	0.113	2.06	9576	231	645	32	[CCR7 - chemokine (c-c motif) receptor 7, SYK - spleen tyrosine kinase, CD83 - cd83 molecule, EBI3 - epstein-barr virus induced 3, LY9 - lymphocyte antigen 9, IL23A - interleukin 23, alpha subunit p19, EGR1 - early growth response 1, CD226 - cd226 molecule, ABL1 - c-abl oncogene 1, non-receptor tyrosine kinase, ATF4 - activating transcription factor 4, TLR1 - toll-like receptor 1, MAPK13 - mitoge…
GO:0034196	acylglycerol transport	0.000493	0.114	58.39	9576	2	164	2	[MTTP - microsomal triglyceride transfer protein, CETP - cholesteryl ester transfer protein, plasma]
GO:0034197	triglyceride transport	0.000493	0.112	58.39	9576	2	164	2	[MTTP - microsomal triglyceride transfer protein, CETP - cholesteryl ester transfer protein, plasma]
GO:0033005	positive regulation of mast cell activation	0.000499	0.111	8.46	9576	9	629	5	[CD226 - cd226 molecule, IL4R - interleukin 4 receptor, GAB2 - grb2-associated binding protein 2, SNX4 - sorting nexin 4, SYK - spleen tyrosine kinase]
GO:0060337	type I interferon signaling pathway	0.00051	0.112	3.34	9576	40	933	13	[IFIT2 - interferon-induced protein with tetratricopeptide repeats 2, RSAD2 - radical s-adenosyl methionine domain containing 2, IRF8 - interferon regulatory factor 8, STAT2 - signal transducer and activator of transcription 2, 113kda, ISG20 - interferon stimulated exonuclease gene 20kda, IFITM2 - interferon induced transmembrane protein 2, EGR1 - early growth response 1, IFNAR1 - interferon (alp…
GO:1905954	positive regulation of lipid localization	0.000537	0.116	5.54	9576	37	374	8	[ANXA2 - annexin a2, ATP8A1 - atpase, aminophospholipid transporter (aplt), class i, type 8a, member 1, NFKBIA - nuclear factor of kappa light polypeptide gene enhancer in b-cells inhibitor, alpha, EHD1 - eh-domain containing 1, IL1B - interleukin 1, beta, ABCG1 - atp-binding cassette, sub-family g (white), member 1, BMP6 - bone morphogenetic protein 6, PLTP - phospholipid transfer protein]
GO:0002830	positive regulation of type 2 immune response	0.000547	0.116	6.12	9576	10	939	6	[RSAD2 - radical s-adenosyl methionine domain containing 2, IL4R - interleukin 4 receptor, TNFSF4 - tumor necrosis factor (ligand) superfamily, member 4, CD74 - cd74 molecule, major histocompatibility complex, class ii invariant chain, PRKCZ - protein kinase c, zeta, CD86 - cd86 molecule]
GO:0044270	cellular nitrogen compound catabolic process	0.000562	0.117	2.34	9576	233	421	24	[EIF4A1 - eukaryotic translation initiation factor 4a1, RPSA - ribosomal protein sa, PDE9A - phosphodiesterase 9a, EIF4A2 - eukaryotic translation initiation factor 4a2, MAGOHB - mago-nashi homolog b (drosophila), NT5E - 5'-nucleotidase, ecto (cd73), RPS2 - ribosomal protein s2, ISG20 - interferon stimulated exonuclease gene 20kda, RPL13A - ribosomal protein l13a, CNOT6L - ccr4-not transcription …
GO:0009607	response to biotic stimulus	0.000587	0.121	1.73	9576	409	690	51	[PLAC8 - placenta-specific 8, SYK - spleen tyrosine kinase, HIST2H2BE - histone cluster 2, h2be, IL23A - interleukin 23, alpha subunit p19, ABL1 - c-abl oncogene 1, non-receptor tyrosine kinase, CASP8 - caspase 8, apoptosis-related cysteine peptidase, TLR1 - toll-like receptor 1, IFI44L - interferon-induced protein 44-like, PYCARD - pyd and card domain containing, TRIM5 - tripartite motif contain…
GO:0032725	positive regulation of granulocyte macrophage colony-stimulating factor production	0.000597	0.121	11.79	9576	7	464	4	[IL23A - interleukin 23, alpha subunit p19, SYK - spleen tyrosine kinase, DDX58 - dead (asp-glu-ala-asp) box polypeptide 58, IL1B - interleukin 1, beta]
GO:0051704	multi-organism process	0.000628	0.125	1.58	9576	750	573	71	[HIST2H2BE - histone cluster 2, h2be, SYK - spleen tyrosine kinase, SLC6A4 - solute carrier family 6 (neurotransmitter transporter), member 4, NUP133 - nucleoporin 133kda, F11R - f11 receptor, VPS37C - vacuolar protein sorting 37 homolog c (s. cerevisiae), RPL13 - ribosomal protein l13, IL23A - interleukin 23, alpha subunit p19, CASP8 - caspase 8, apoptosis-related cysteine peptidase, IFI44L - in…
GO:0051707	response to other organism	0.000641	0.126	2.03	9576	263	573	32	[HIST2H2BE - histone cluster 2, h2be, SYK - spleen tyrosine kinase, BATF - basic leucine zipper transcription factor, atf-like, STAT2 - signal transducer and activator of transcription 2, 113kda, BAIAP2L1 - bai1-associated protein 2-like 1, ISG20 - interferon stimulated exonuclease gene 20kda, IL23A - interleukin 23, alpha subunit p19, ISG15 - isg15 ubiquitin-like modifier, IFI44L - interferon-in…
GO:0050867	positive regulation of cell activation	0.000646	0.125	2.39	9576	183	481	22	[IL4R - interleukin 4 receptor, CCR7 - chemokine (c-c motif) receptor 7, CD38 - cd38 molecule, SYK - spleen tyrosine kinase, CD83 - cd83 molecule, NCK2 - nck adaptor protein 2, EBI3 - epstein-barr virus induced 3, PRKCZ - protein kinase c, zeta, CD40 - cd40 molecule, tnf receptor superfamily member 5, IL1B - interleukin 1, beta, TNFRSF4 - tumor necrosis factor receptor superfamily, member 4, IL23…
GO:0042127	regulation of cell proliferation	0.000751	0.143	1.4	9576	849	951	118	[EMD - emerin, PLAC8 - placenta-specific 8, TSC1 - tuberous sclerosis 1, EBI3 - epstein-barr virus induced 3, CDC25B - cell division cycle 25b, ABL1 - c-abl oncogene 1, non-receptor tyrosine kinase, GAB2 - grb2-associated binding protein 2, CD74 - cd74 molecule, major histocompatibility complex, class ii invariant chain, GCNT2 - glucosaminyl (n-acetyl) transferase 2, i-branching enzyme (i blood g…
GO:0006401	RNA catabolic process	0.000785	0.147	2.81	9576	145	376	16	[EIF4A1 - eukaryotic translation initiation factor 4a1, RPSA - ribosomal protein sa, EIF4A2 - eukaryotic translation initiation factor 4a2, RPS2 - ribosomal protein s2, MAGOHB - mago-nashi homolog b (drosophila), ISG20 - interferon stimulated exonuclease gene 20kda, RPL13A - ribosomal protein l13a, CNOT6L - ccr4-not transcription complex, subunit 6-like, RPL13 - ribosomal protein l13, XRN1 - 5'-3…
GO:0006144	purine nucleobase metabolic process	0.000818	0.151	8.05	9576	11	541	5	[GMPR - guanosine monophosphate reductase, ADA - adenosine deaminase, ACPP - acid phosphatase, prostate, CECR1 - cat eye syndrome chromosome region, candidate 1, DPYD - dihydropyrimidine dehydrogenase]
GO:0001952	regulation of cell-matrix adhesion	0.00082	0.15	10.67	9576	51	88	5	[PLAU - plasminogen activator, urokinase, CCR7 - chemokine (c-c motif) receptor 7, TSC1 - tuberous sclerosis 1, GSK3B - glycogen synthase kinase 3 beta, NINJ1 - ninjurin 1]
GO:0051029	rRNA transport	0.000855	0.154	60.61	9576	4	79	2	[RPSA - ribosomal protein sa, TSC1 - tuberous sclerosis 1]
GO:2000113	negative regulation of cellular macromolecule biosynthetic process	0.00086	0.153	2.15	9576	819	152	28	[TSC1 - tuberous sclerosis 1, KLF12 - kruppel-like factor 12, HIST1H1C - histone cluster 1, h1c, CNOT6L - ccr4-not transcription complex, subunit 6-like, HIST1H3H - histone cluster 1, h3h, ATF5 - activating transcription factor 5, ZHX2 - zinc fingers and homeoboxes 2, NFIL3 - nuclear factor, interleukin 3 regulated, BEND5 - ben domain containing 5, HIST1H2AC - histone cluster 1, h2ac, ITM2B - int…
GO:0019439	aromatic compound catabolic process	0.000902	0.158	2.27	9576	241	421	24	[EIF4A1 - eukaryotic translation initiation factor 4a1, RPSA - ribosomal protein sa, PDE9A - phosphodiesterase 9a, EIF4A2 - eukaryotic translation initiation factor 4a2, MAGOHB - mago-nashi homolog b (drosophila), NT5E - 5'-nucleotidase, ecto (cd73), RPS2 - ribosomal protein s2, ISG20 - interferon stimulated exonuclease gene 20kda, RPL13A - ribosomal protein l13a, CNOT6L - ccr4-not transcription …
GO:0032373	positive regulation of sterol transport	0.000905	0.157	12.18	9576	11	286	4	[ANXA2 - annexin a2, NFKBIA - nuclear factor of kappa light polypeptide gene enhancer in b-cells inhibitor, alpha, ABCG1 - atp-binding cassette, sub-family g (white), member 1, PLTP - phospholipid transfer protein]
GO:0032376	positive regulation of cholesterol transport	0.000905	0.155	12.18	9576	11	286	4	[ANXA2 - annexin a2, NFKBIA - nuclear factor of kappa light polypeptide gene enhancer in b-cells inhibitor, alpha, ABCG1 - atp-binding cassette, sub-family g (white), member 1, PLTP - phospholipid transfer protein]
GO:0051251	positive regulation of lymphocyte activation	0.00092	0.155	2.44	9576	163	481	20	[IL4R - interleukin 4 receptor, CCR7 - chemokine (c-c motif) receptor 7, CD38 - cd38 molecule, SYK - spleen tyrosine kinase, CD83 - cd83 molecule, NCK2 - nck adaptor protein 2, EBI3 - epstein-barr virus induced 3, PRKCZ - protein kinase c, zeta, CD40 - cd40 molecule, tnf receptor superfamily member 5, IL1B - interleukin 1, beta, TNFRSF4 - tumor necrosis factor receptor superfamily, member 4, IL23…
GO:2001179	regulation of interleukin-10 secretion	0.000922	0.153	19.38	9576	6	247	3	[TNFRSF21 - tumor necrosis factor receptor superfamily, member 21, PRKCZ - protein kinase c, zeta, PYCARD - pyd and card domain containing]

## Sheet: Supplementary Table 3 GO increa
Supplementary Table 3. Gene ontology enrichment analysis for increased expression genes ranked by P-value. Processes with P<4.78E-6 are indicated in bold.
GO Term	Description	P-value	FDR q-value	Enrichment	N	B	n	b	Genes
GO:0051290	protein heterotetramerization	3.42e-06	0.0358	12.96	4649	16	157	7	[HIST1H3D - histone cluster 1, h3d, HIST1H3E - histone cluster 1, h3e, HIST1H4E - histone cluster 1, h4e, ANXA2 - annexin a2, HIST1H4H - histone cluster 1, h4h, HIST1H3G - histone cluster 1, h3g, HIST1H3H - histone cluster 1, h3h]
GO:0002376	immune system process	6.82e-06	0.0357	1.8	4649	563	312	68	[PLAC8 - placenta-specific 8, TSC1 - tuberous sclerosis 1, HIST2H2BE - histone cluster 2, h2be, SYK - spleen tyrosine kinase, ATM - ataxia telangiectasia mutated, IFI44L - interferon-induced protein 44-like, CECR1 - cat eye syndrome chromosome region, candidate 1, BTN3A2 - butyrophilin, subfamily 3, member a2, P2RX1 - purinergic receptor p2x, ligand-gated ion channel, 1, SELL - selectin l, BTN3A1…
GO:0006334	nucleosome assembly	1.64e-05	0.0574	6.03	4649	54	157	11	[HIST1H3D - histone cluster 1, h3d, HIST1H2BD - histone cluster 1, h2bd, HIST1H3E - histone cluster 1, h3e, HIST1H4E - histone cluster 1, h4e, HIST1H4H - histone cluster 1, h4h, HIST2H2BE - histone cluster 2, h2be, HIST1H2BJ - histone cluster 1, h2bj, HIST1H1C - histone cluster 1, h1c, HIST1H2BH - histone cluster 1, h2bh, HIST1H3G - histone cluster 1, h3g, HIST1H3H - histone cluster 1, h3h]
GO:0034723	DNA replication-dependent nucleosome organization	2.32e-05	0.0608	12.69	4649	14	157	6	[HIST1H3D - histone cluster 1, h3d, HIST1H3E - histone cluster 1, h3e, HIST1H4E - histone cluster 1, h4e, HIST1H4H - histone cluster 1, h4h, HIST1H3G - histone cluster 1, h3g, HIST1H3H - histone cluster 1, h3h]
GO:0006335	DNA replication-dependent nucleosome assembly	2.32e-05	0.0486	12.69	4649	14	157	6	[HIST1H3D - histone cluster 1, h3d, HIST1H3E - histone cluster 1, h3e, HIST1H4E - histone cluster 1, h4e, HIST1H4H - histone cluster 1, h4h, HIST1H3G - histone cluster 1, h3g, HIST1H3H - histone cluster 1, h3h]
GO:0000183	chromatin silencing at rDNA	6.1e-05	0.107	11.1	4649	16	157	6	[HIST1H3D - histone cluster 1, h3d, HIST1H3E - histone cluster 1, h3e, HIST1H4E - histone cluster 1, h4e, HIST1H4H - histone cluster 1, h4h, HIST1H3G - histone cluster 1, h3g, HIST1H3H - histone cluster 1, h3h]
GO:0034728	nucleosome organization	6.84e-05	0.102	5.25	4649	62	157	11	[HIST1H3D - histone cluster 1, h3d, HIST1H2BD - histone cluster 1, h2bd, HIST1H3E - histone cluster 1, h3e, HIST1H4E - histone cluster 1, h4e, HIST1H4H - histone cluster 1, h4h, HIST2H2BE - histone cluster 2, h2be, HIST1H2BJ - histone cluster 1, h2bj, HIST1H1C - histone cluster 1, h1c, HIST1H2BH - histone cluster 1, h2bh, HIST1H3G - histone cluster 1, h3g, HIST1H3H - histone cluster 1, h3h]
GO:0051291	protein heterooligomerization	9.63e-05	0.126	7.18	4649	33	157	8	[HIST1H3D - histone cluster 1, h3d, HIST1H3E - histone cluster 1, h3e, HIST1H4E - histone cluster 1, h4e, ANXA2 - annexin a2, HIST1H4H - histone cluster 1, h4h, TSC1 - tuberous sclerosis 1, HIST1H3G - histone cluster 1, h3g, HIST1H3H - histone cluster 1, h3h]
GO:0006342	chromatin silencing	0.000154	0.18	4.07	4649	35	392	12	[HIST1H3D - histone cluster 1, h3d, HIST1H3C - histone cluster 1, h3c, HIST1H3E - histone cluster 1, h3e, HIST1H4E - histone cluster 1, h4e, HIST3H2A - histone cluster 3, h2a, HIST1H4H - histone cluster 1, h4h, HIST1H2AC - histone cluster 1, h2ac, HIST1H2AG - histone cluster 1, h2ag, HIST1H3G - histone cluster 1, h3g, HIST2H2AB - histone cluster 2, h2ab, HIST1H3H - histone cluster 1, h3h, H2AFJ -…
GO:0046085	adenosine metabolic process	0.000341	0.357	23.72	4649	4	147	3	[NT5E - 5'-nucleotidase, ecto (cd73), ACPP - acid phosphatase, prostate, CECR1 - cat eye syndrome chromosome region, candidate 1]
GO:0045815	positive regulation of gene expression, epigenetic	0.000539	0.513	5.67	4649	34	193	8	[HIST1H3D - histone cluster 1, h3d, TAF1A - tata box binding protein (tbp)-associated factor, rna polymerase i, a, 48kda, HIST1H3E - histone cluster 1, h3e, HIST1H4E - histone cluster 1, h4e, HIST1H4H - histone cluster 1, h4h, TAF1D - tata box binding protein (tbp)-associated factor, rna polymerase i, d, 41kda, HIST1H3G - histone cluster 1, h3g, HIST1H3H - histone cluster 1, h3h]
GO:0019730	antimicrobial humoral response	0.00054	0.471	29.8	4649	9	52	3	[LEAP2 - liver expressed antimicrobial peptide 2, HIST2H2BE - histone cluster 2, h2be, HIST1H2BJ - histone cluster 1, h2bj]
GO:0051262	protein tetramerization	0.000593	0.478	3.37	4649	44	407	13	[HIST1H3D - histone cluster 1, h3d, HIST1H3C - histone cluster 1, h3c, HIST1H3E - histone cluster 1, h3e, ATPIF1 - atpase inhibitory factor 1, HIST1H3G - histone cluster 1, h3g, ACPP - acid phosphatase, prostate, HIST1H3H - histone cluster 1, h3h, HIST1H4E - histone cluster 1, h4e, ANXA2 - annexin a2, HIST1H4H - histone cluster 1, h4h, PCBD1 - pterin-4 alpha-carbinolamine dehydratase/dimerization…
GO:0065004	protein-DNA complex assembly	0.000658	0.492	5.88	4649	79	80	8	[HIST1H2BD - histone cluster 1, h2bd, HIST1H4H - histone cluster 1, h4h, HIST2H2BE - histone cluster 2, h2be, HIST1H2BJ - histone cluster 1, h2bj, HIST1H1C - histone cluster 1, h1c, HIST1H2BH - histone cluster 1, h2bh, HIST1H3G - histone cluster 1, h3g, HIST1H3H - histone cluster 1, h3h]
GO:0002227	innate immune response in mucosa	0.000693	0.484	59.6	4649	3	52	2	[HIST2H2BE - histone cluster 2, h2be, HIST1H2BJ - histone cluster 1, h2bj]
GO:0002252	immune effector process	0.000735	0.481	1.97	4649	273	294	34	[PLAC8 - placenta-specific 8, TSC1 - tuberous sclerosis 1, SYK - spleen tyrosine kinase, ISG20 - interferon stimulated exonuclease gene 20kda, STAT2 - signal transducer and activator of transcription 2, 113kda, ISG15 - isg15 ubiquitin-like modifier, ATP8A1 - atpase, aminophospholipid transporter (aplt), class i, type 8a, member 1, GAPT - grb2-binding adaptor protein, transmembrane, IFI44L - inter…
GO:0048103	somatic stem cell division	0.000752	0.463	5.42	4649	5	857	5	[HOXB4 - homeobox b4, LEF1 - lymphoid enhancer-binding factor 1, ASPM - asp (abnormal spindle) homolog, microcephaly associated (drosophila), NUMB - numb homolog (drosophila), KIT - v-kit hardy-zuckerman 4 feline sarcoma viral oncogene homolog]
GO:0045321	leukocyte activation	0.000775	0.451	1.63	4649	243	645	55	[TSC1 - tuberous sclerosis 1, PLAC8 - placenta-specific 8, SYK - spleen tyrosine kinase, NCK1 - nck adaptor protein 1, DPP4 - dipeptidyl-peptidase 4, IFNAR1 - interferon (alpha, beta and omega) receptor 1, SPI1 - spleen focus forming virus (sffv) proviral integration oncogene, ITM2A - integral membrane protein 2a, CD79A - cd79a molecule, immunoglobulin-associated alpha, CECR1 - cat eye syndrome c…
GO:0016458	gene silencing	0.000797	0.439	4.85	4649	55	157	9	[HIST1H3D - histone cluster 1, h3d, HIST1H3E - histone cluster 1, h3e, HIST1H4E - histone cluster 1, h4e, HIST1H4H - histone cluster 1, h4h, HIST1H2AC - histone cluster 1, h2ac, CNOT6L - ccr4-not transcription complex, subunit 6-like, HIST1H3G - histone cluster 1, h3g, HIST1H3H - histone cluster 1, h3h, H2AFJ - h2a histone family, member j]
GO:0031327	negative regulation of cellular biosynthetic process	0.000859	0.45	1.37	4649	469	864	119	[ZMYND8 - zinc finger, mynd-type containing 8, MLX - mlx, max dimerization protein, GFI1 - growth factor independent 1 transcription repressor, ZNF202 - zinc finger protein 202, SAP18 - sin3a-associated protein, 18kda, TSC1 - tuberous sclerosis 1, NCK1 - nck adaptor protein 1, KLF12 - kruppel-like factor 12, ZEB1 - zinc finger e-box binding homeobox 1, HSBP1 - heat shock factor binding protein 1,…
GO:0045814	negative regulation of gene expression, epigenetic	0.00092	0.459	5.38	4649	44	157	8	[HIST1H3D - histone cluster 1, h3d, HIST1H3E - histone cluster 1, h3e, HIST1H4E - histone cluster 1, h4e, HIST1H4H - histone cluster 1, h4h, HIST1H2AC - histone cluster 1, h2ac, HIST1H3G - histone cluster 1, h3g, HIST1H3H - histone cluster 1, h3h, H2AFJ - h2a histone family, member j]
GO:0009890	negative regulation of biosynthetic process	0.000982	0.467	1.36	4649	471	864	119	[ZMYND8 - zinc finger, mynd-type containing 8, MLX - mlx, max dimerization protein, GFI1 - growth factor independent 1 transcription repressor, ZNF202 - zinc finger protein 202, TSC1 - tuberous sclerosis 1, SAP18 - sin3a-associated protein, 18kda, NCK1 - nck adaptor protein 1, KLF12 - kruppel-like factor 12, ZEB1 - zinc finger e-box binding homeobox 1, HSBP1 - heat shock factor binding protein 1,…

## Sheet: Supplementary Table 4 GO decrea
Supplementary Table 4. Gene ontology enrichment analysis for decreased expression genes ranked by P-value. Processes with P<4.46E-6 are indicated in bold.
GO Term	Description	P-value	FDR q-value	Enrichment	N	B	n	b	Genes
GO:0006952	defense response	2.25e-07	0.00253	2.07	4928	266	529	59	[NCF2 - neutrophil cytosolic factor 2, CD83 - cd83 molecule, F11R - f11 receptor, SIGLEC14 - sialic acid binding ig-like lectin 14, IL23A - interleukin 23, alpha subunit p19, ABL1 - c-abl oncogene 1, non-receptor tyrosine kinase, CD74 - cd74 molecule, major histocompatibility complex, class ii invariant chain, REL - v-rel avian reticuloendotheliosis viral oncogene homolog, TLR1 - toll-like recept…
GO:0006954	inflammatory response	7.22e-07	0.00405	2.63	4928	124	529	35	[ICAM1 - intercellular adhesion molecule 1, CCR7 - chemokine (c-c motif) receptor 7, F11R - f11 receptor, STAT3 - signal transducer and activator of transcription 3 (acute-phase response factor), TNFRSF4 - tumor necrosis factor receptor superfamily, member 4, IL23A - interleukin 23, alpha subunit p19, TNFSF4 - tumor necrosis factor (ligand) superfamily, member 4, REL - v-rel avian reticuloendothe…
GO:0019221	cytokine-mediated signaling pathway	1.11e-06	0.00416	2.33	4928	143	622	42	[TNFRSF9 - tumor necrosis factor receptor superfamily, member 9, ICAM1 - intercellular adhesion molecule 1, CCR7 - chemokine (c-c motif) receptor 7, CIITA - class ii, major histocompatibility complex, transactivator, STAT3 - signal transducer and activator of transcription 3 (acute-phase response factor), EBI3 - epstein-barr virus induced 3, STAT5A - signal transducer and activator of transcripti…
GO:0002684	positive regulation of immune system process	1.37e-06	0.00384	2.36	4928	277	309	41	[CCR7 - chemokine (c-c motif) receptor 7, CMTM3 - cklf-like marvel transmembrane domain containing 3, CD83 - cd83 molecule, MUC19 - mucin 19, oligomeric, NCK2 - nck adaptor protein 2, EBI3 - epstein-barr virus induced 3, IL23A - interleukin 23, alpha subunit p19, TNFRSF4 - tumor necrosis factor receptor superfamily, member 4, ABL1 - c-abl oncogene 1, non-receptor tyrosine kinase, GAB2 - grb2-asso…
GO:0071310	cellular response to organic substance	3.64e-06	0.00817	1.54	4928	364	987	112	[TRIB3 - tribbles homolog 3 (drosophila), EMD - emerin, ELK1 - elk1, member of ets oncogene family, CDH1 - cadherin 1, type 1, e-cadherin (epithelial), ABL1 - c-abl oncogene 1, non-receptor tyrosine kinase, HTRA2 - htra serine peptidase 2, P2RX4 - purinergic receptor p2x, ligand-gated ion channel, 4, EIF4A2 - eukaryotic translation initiation factor 4a2, CCL19 - chemokine (c-c motif) ligand 19, C…
GO:0070374	positive regulation of ERK1 and ERK2 cascade	7.1e-06	0.0133	2.52	4928	60	913	28	[PRKCDBP - protein kinase c, delta binding protein, PDGFA - platelet-derived growth factor alpha polypeptide, ICAM1 - intercellular adhesion molecule 1, CCR7 - chemokine (c-c motif) receptor 7, GPR55 - g protein-coupled receptor 55, NOD1 - nucleotide-binding oligomerization domain containing 1, ABL1 - c-abl oncogene 1, non-receptor tyrosine kinase, CD74 - cd74 molecule, major histocompatibility c…
GO:0001817	regulation of cytokine production	9.94e-06	0.0159	1.95	4928	192	657	50	[TNFRSF9 - tumor necrosis factor receptor superfamily, member 9, BIRC2 - baculoviral iap repeat containing 2, F11R - f11 receptor, CD83 - cd83 molecule, EBI3 - epstein-barr virus induced 3, TRAF3IP1 - tnf receptor-associated factor 3 interacting protein 1, IL23A - interleukin 23, alpha subunit p19, ABL1 - c-abl oncogene 1, non-receptor tyrosine kinase, CD74 - cd74 molecule, major histocompatibili…
GO:0006955	immune response	1.28e-05	0.0179	1.98	4928	234	521	49	[NCF2 - neutrophil cytosolic factor 2, CIITA - class ii, major histocompatibility complex, transactivator, CD83 - cd83 molecule, SIGLEC14 - sialic acid binding ig-like lectin 14, EBI3 - epstein-barr virus induced 3, GEM - gtp binding protein overexpressed in skeletal muscle, IL23A - interleukin 23, alpha subunit p19, ABL1 - c-abl oncogene 1, non-receptor tyrosine kinase, CD74 - cd74 molecule, maj…
GO:0050778	positive regulation of immune response	1.98e-05	0.0247	1.95	4928	185	657	48	[ITCH - itchy e3 ubiquitin protein ligase, CCR7 - chemokine (c-c motif) receptor 7, CMTM3 - cklf-like marvel transmembrane domain containing 3, SNX4 - sorting nexin 4, BIRC2 - baculoviral iap repeat containing 2, MUC19 - mucin 19, oligomeric, IL23A - interleukin 23, alpha subunit p19, CD226 - cd226 molecule, ABL1 - c-abl oncogene 1, non-receptor tyrosine kinase, TNFSF4 - tumor necrosis factor (li…
GO:0070663	regulation of leukocyte proliferation	2.26e-05	0.0253	2.81	4928	64	631	23	[GPR183 - g protein-coupled receptor 183, ITCH - itchy e3 ubiquitin protein ligase, TWSG1 - twisted gastrulation homolog 1 (drosophila), RPS3 - ribosomal protein s3, IL2RA - interleukin 2 receptor, alpha, RIPK2 - receptor-interacting serine-threonine kinase 2, NCK2 - nck adaptor protein 2, EBI3 - epstein-barr virus induced 3, PRNP - prion protein, CD40 - cd40 molecule, tnf receptor superfamily me…
GO:0002682	regulation of immune system process	3.22e-05	0.0328	1.6	4928	398	657	85	[CMTM3 - cklf-like marvel transmembrane domain containing 3, P4HTM - prolyl 4-hydroxylase, transmembrane (endoplasmic reticulum), BIRC2 - baculoviral iap repeat containing 2, GPR55 - g protein-coupled receptor 55, CD83 - cd83 molecule, MUC19 - mucin 19, oligomeric, TRAF3IP1 - tnf receptor-associated factor 3 interacting protein 1, EBI3 - epstein-barr virus induced 3, SDC4 - syndecan 4, IL23A - in…
GO:0032946	positive regulation of mononuclear cell proliferation	3.23e-05	0.0302	3.33	4928	41	613	17	[GPR183 - g protein-coupled receptor 183, RPS3 - ribosomal protein s3, IL2RA - interleukin 2 receptor, alpha, RIPK2 - receptor-interacting serine-threonine kinase 2, EBI3 - epstein-barr virus induced 3, NCK2 - nck adaptor protein 2, CD40 - cd40 molecule, tnf receptor superfamily member 5, IL1B - interleukin 1, beta, IL23A - interleukin 23, alpha subunit p19, TNFRSF4 - tumor necrosis factor recept…
GO:0050671	positive regulation of lymphocyte proliferation	3.23e-05	0.0278	3.33	4928	41	613	17	[GPR183 - g protein-coupled receptor 183, RPS3 - ribosomal protein s3, IL2RA - interleukin 2 receptor, alpha, RIPK2 - receptor-interacting serine-threonine kinase 2, NCK2 - nck adaptor protein 2, EBI3 - epstein-barr virus induced 3, IL1B - interleukin 1, beta, CD40 - cd40 molecule, tnf receptor superfamily member 5, TNFRSF4 - tumor necrosis factor receptor superfamily, member 4, IL23A - interleuk…
GO:0070887	cellular response to chemical stimulus	3.79e-05	0.0303	1.43	4928	443	987	127	[TRIB3 - tribbles homolog 3 (drosophila), NCF2 - neutrophil cytosolic factor 2, EMD - emerin, ELK1 - elk1, member of ets oncogene family, CDH1 - cadherin 1, type 1, e-cadherin (epithelial), ABL1 - c-abl oncogene 1, non-receptor tyrosine kinase, HTRA2 - htra serine peptidase 2, NUDT2 - nudix (nucleoside diphosphate linked moiety x)-type motif 2, P2RX4 - purinergic receptor p2x, ligand-gated ion ch…
GO:0010874	regulation of cholesterol efflux	3.85e-05	0.0288	56.86	4928	5	52	3	[NFKBIA - nuclear factor of kappa light polypeptide gene enhancer in b-cells inhibitor, alpha, CETP - cholesteryl ester transfer protein, plasma, PLTP - phospholipid transfer protein]
GO:2000009	negative regulation of protein localization to cell surface	4.07e-05	0.0285	16.26	4928	4	303	4	[ASTN2 - astrotactin 2, NEDD4L - neural precursor cell expressed, developmentally down-regulated 4-like, e3 ubiquitin protein ligase, COMMD1 - copper metabolism (murr1) domain containing 1, TAX1BP3 - tax1 (human t-cell leukemia virus type i) binding protein 3]
GO:0070665	positive regulation of leukocyte proliferation	4.62e-05	0.0305	3.25	4928	42	613	17	[GPR183 - g protein-coupled receptor 183, RPS3 - ribosomal protein s3, IL2RA - interleukin 2 receptor, alpha, RIPK2 - receptor-interacting serine-threonine kinase 2, NCK2 - nck adaptor protein 2, EBI3 - epstein-barr virus induced 3, IL1B - interleukin 1, beta, CD40 - cd40 molecule, tnf receptor superfamily member 5, TNFRSF4 - tumor necrosis factor receptor superfamily, member 4, IL23A - interleuk…
GO:0033599	regulation of mammary gland epithelial cell proliferation	4.69e-05	0.0293	328.53	4928	5	6	2	[CCND1 - cyclin d1, PHB2 - prohibitin 2]
GO:0016266	O-glycan processing	4.85e-05	0.0286	5.63	4928	17	463	9	[GCNT1 - glucosaminyl (n-acetyl) transferase 1, core 2, ST3GAL3 - st3 beta-galactoside alpha-2,3-sialyltransferase 3, GCNT3 - glucosaminyl (n-acetyl) transferase 3, mucin type, ST3GAL2 - st3 beta-galactoside alpha-2,3-sialyltransferase 2, POFUT1 - protein o-fucosyltransferase 1, MUC19 - mucin 19, oligomeric, CHST4 - carbohydrate (n-acetylglucosamine 6-o) sulfotransferase 4, GALNT11 - udp-n-acetyl…
GO:0032944	regulation of mononuclear cell proliferation	4.86e-05	0.0273	2.77	4928	62	631	22	[GPR183 - g protein-coupled receptor 183, TWSG1 - twisted gastrulation homolog 1 (drosophila), ITCH - itchy e3 ubiquitin protein ligase, RPS3 - ribosomal protein s3, IL2RA - interleukin 2 receptor, alpha, RIPK2 - receptor-interacting serine-threonine kinase 2, NCK2 - nck adaptor protein 2, EBI3 - epstein-barr virus induced 3, PRNP - prion protein, CD40 - cd40 molecule, tnf receptor superfamily me…
GO:0050670	regulation of lymphocyte proliferation	4.86e-05	0.026	2.77	4928	62	631	22	[GPR183 - g protein-coupled receptor 183, TWSG1 - twisted gastrulation homolog 1 (drosophila), ITCH - itchy e3 ubiquitin protein ligase, RPS3 - ribosomal protein s3, IL2RA - interleukin 2 receptor, alpha, RIPK2 - receptor-interacting serine-threonine kinase 2, NCK2 - nck adaptor protein 2, EBI3 - epstein-barr virus induced 3, PRNP - prion protein, CD40 - cd40 molecule, tnf receptor superfamily me…
GO:0071219	cellular response to molecule of bacterial origin	5.5e-05	0.028	3.08	4928	45	639	18	[ICAM1 - intercellular adhesion molecule 1, MAPK8 - mitogen-activated protein kinase 8, TNIP1 - tnfaip3 interacting protein 1, IRF8 - interferon regulatory factor 8, RIPK2 - receptor-interacting serine-threonine kinase 2, TLR6 - toll-like receptor 6, BCR - breakpoint cluster region, CD40 - cd40 molecule, tnf receptor superfamily member 5, ABL1 - c-abl oncogene 1, non-receptor tyrosine kinase, CXC…
GO:0001819	positive regulation of cytokine production	6.04e-05	0.0295	2.68	4928	125	368	25	[CCR7 - chemokine (c-c motif) receptor 7, CD83 - cd83 molecule, EBI3 - epstein-barr virus induced 3, EGR1 - early growth response 1, IL23A - interleukin 23, alpha subunit p19, LY9 - lymphocyte antigen 9, CD226 - cd226 molecule, ABL1 - c-abl oncogene 1, non-receptor tyrosine kinase, ATF4 - activating transcription factor 4, TLR1 - toll-like receptor 1, MAPK13 - mitogen-activated protein kinase 13,…
GO:0010941	regulation of cell death	7.08e-05	0.0331	1.41	4928	512	901	132	[TNFRSF9 - tumor necrosis factor receptor superfamily, member 9, CTTN - cortactin, BIRC2 - baculoviral iap repeat containing 2, PHLDA3 - pleckstrin homology-like domain, family a, member 3, ELK1 - elk1, member of ets oncogene family, GADD45A - growth arrest and dna-damage-inducible, alpha, PGAP2 - post-gpi attachment to proteins 2, CARD11 - caspase recruitment domain family, member 11, DDB1 - dam…
GO:0060749	mammary gland alveolus development	7.93e-05	0.0356	273.78	4928	6	6	2	[CCND1 - cyclin d1, PHB2 - prohibitin 2]
GO:0050776	regulation of immune response	9.86e-05	0.0425	1.72	4928	262	657	60	[CMTM3 - cklf-like marvel transmembrane domain containing 3, BIRC2 - baculoviral iap repeat containing 2, MUC19 - mucin 19, oligomeric, IL23A - interleukin 23, alpha subunit p19, ABL1 - c-abl oncogene 1, non-receptor tyrosine kinase, CD74 - cd74 molecule, major histocompatibility complex, class ii invariant chain, GAB2 - grb2-associated binding protein 2, CASP8 - caspase 8, apoptosis-related cyst…
GO:0046651	lymphocyte proliferation	0.000101	0.0421	3.68	4928	28	622	13	[RIPK2 - receptor-interacting serine-threonine kinase 2, EBI3 - epstein-barr virus induced 3, CD40 - cd40 molecule, tnf receptor superfamily member 5, IL23A - interleukin 23, alpha subunit p19, TNFRSF4 - tumor necrosis factor receptor superfamily, member 4, ABL1 - c-abl oncogene 1, non-receptor tyrosine kinase, TNFSF4 - tumor necrosis factor (ligand) superfamily, member 4, BCL2 - b-cell cll/lymph…
GO:0050867	positive regulation of cell activation	0.000121	0.0485	2.86	4928	106	341	21	[IL4R - interleukin 4 receptor, CCR7 - chemokine (c-c motif) receptor 7, SNX4 - sorting nexin 4, CD83 - cd83 molecule, IL2RA - interleukin 2 receptor, alpha, NCK2 - nck adaptor protein 2, EBI3 - epstein-barr virus induced 3, PRKCZ - protein kinase c, zeta, CD40 - cd40 molecule, tnf receptor superfamily member 5, IL1B - interleukin 1, beta, TNFRSF4 - tumor necrosis factor receptor superfamily, mem…
GO:0030155	regulation of cell adhesion	0.000128	0.0495	2.35	4928	218	269	28	[CCR7 - chemokine (c-c motif) receptor 7, CD83 - cd83 molecule, EBI3 - epstein-barr virus induced 3, NCK2 - nck adaptor protein 2, PLAU - plasminogen activator, urokinase, IL23A - interleukin 23, alpha subunit p19, ABL1 - c-abl oncogene 1, non-receptor tyrosine kinase, CYTH3 - cytohesin 3, ADA - adenosine deaminase, TNFSF9 - tumor necrosis factor (ligand) superfamily, member 9, SKAP1 - src kinase…
GO:0060333	interferon-gamma-mediated signaling pathway	0.00013	0.0487	4.4	4928	18	622	10	[ICAM1 - intercellular adhesion molecule 1, TRIM68 - tripartite motif containing 68, IRF8 - interferon regulatory factor 8, PRKCD - protein kinase c, delta, IRF5 - interferon regulatory factor 5, CIITA - class ii, major histocompatibility complex, transactivator, VCAM1 - vascular cell adhesion molecule 1, TRIM8 - tripartite motif containing 8, CD44 - cd44 molecule (indian blood group), IFNGR1 - i…
GO:0002830	positive regulation of type 2 immune response	0.000138	0.0499	6.61	4928	7	639	6	[IL4R - interleukin 4 receptor, TNFSF4 - tumor necrosis factor (ligand) superfamily, member 4, CD74 - cd74 molecule, major histocompatibility complex, class ii invariant chain, PRKCZ - protein kinase c, zeta, CD86 - cd86 molecule, RARA - retinoic acid receptor, alpha]
GO:0042221	response to chemical	0.000142	0.0498	1.3	4928	728	987	190	[TRIB3 - tribbles homolog 3 (drosophila), NCF2 - neutrophil cytosolic factor 2, TNFRSF9 - tumor necrosis factor receptor superfamily, member 9, EMD - emerin, BIRC2 - baculoviral iap repeat containing 2, CIITA - class ii, major histocompatibility complex, transactivator, CDH1 - cadherin 1, type 1, e-cadherin (epithelial), CD83 - cd83 molecule, ELK1 - elk1, member of ets oncogene family, COX4I1 - c…
GO:0045047	protein targeting to ER	0.000158	0.0538	2.54	4928	40	971	20	[SRP54 - signal recognition particle 54kda, RPSA - ribosomal protein sa, RPL22 - ribosomal protein l22, RPS3 - ribosomal protein s3, RPS2 - ribosomal protein s2, RPL21 - ribosomal protein l21, RPLP2 - ribosomal protein, large, p2, RPL13A - ribosomal protein l13a, RPL36A - ribosomal protein l36a, RPL13 - ribosomal protein l13, RPS11 - ribosomal protein s11, RPL7A - ribosomal protein l7a, RPS8 - ri…
GO:0032943	mononuclear cell proliferation	0.000158	0.0522	3.55	4928	29	622	13	[RIPK2 - receptor-interacting serine-threonine kinase 2, EBI3 - epstein-barr virus induced 3, CD40 - cd40 molecule, tnf receptor superfamily member 5, TNFRSF4 - tumor necrosis factor receptor superfamily, member 4, IL23A - interleukin 23, alpha subunit p19, ABL1 - c-abl oncogene 1, non-receptor tyrosine kinase, TNFSF4 - tumor necrosis factor (ligand) superfamily, member 4, BCL2 - b-cell cll/lymph…
GO:0070972	protein localization to endoplasmic reticulum	0.000159	0.0508	2.43	4928	46	971	22	[RPSA - ribosomal protein sa, SRP54 - signal recognition particle 54kda, RPL22 - ribosomal protein l22, RPS3 - ribosomal protein s3, RPS2 - ribosomal protein s2, RPL21 - ribosomal protein l21, RPLP2 - ribosomal protein, large, p2, RPL13A - ribosomal protein l13a, RPL36A - ribosomal protein l36a, PPP1R15A - protein phosphatase 1, regulatory subunit 15a, RPL13 - ribosomal protein l13, RPS11 - ribos…
GO:0043372	positive regulation of CD4-positive, alpha-beta T cell differentiation	0.000159	0.0495	4.63	4928	15	639	9	[IL23A - interleukin 23, alpha subunit p19, IL4R - interleukin 4 receptor, TNFSF4 - tumor necrosis factor (ligand) superfamily, member 4, MYB - v-myb avian myeloblastosis viral oncogene homolog, CD83 - cd83 molecule, RIPK2 - receptor-interacting serine-threonine kinase 2, CD86 - cd86 molecule, PRKCZ - protein kinase c, zeta, RARA - retinoic acid receptor, alpha]
GO:0071345	cellular response to cytokine stimulus	0.00016	0.0485	3.85	4928	90	199	14	[EIF4A2 - eukaryotic translation initiation factor 4a2, CCR7 - chemokine (c-c motif) receptor 7, RPL13A - ribosomal protein l13a, CD40 - cd40 molecule, tnf receptor superfamily member 5, TCF7 - transcription factor 7 (t-cell specific, hmg-box), VCAM1 - vascular cell adhesion molecule 1, IL8 - interleukin 8, GSK3B - glycogen synthase kinase 3 beta, RPL3 - ribosomal protein l3, CD86 - cd86 molecule…
GO:0002237	response to molecule of bacterial origin	0.000173	0.051	2.26	4928	99	639	29	[ICAM1 - intercellular adhesion molecule 1, TNFRSF9 - tumor necrosis factor receptor superfamily, member 9, CCR7 - chemokine (c-c motif) receptor 7, JUNB - jun b proto-oncogene, TNFRSF4 - tumor necrosis factor receptor superfamily, member 4, ABL1 - c-abl oncogene 1, non-receptor tyrosine kinase, CXCL16 - chemokine (c-x-c motif) ligand 16, TNFSF4 - tumor necrosis factor (ligand) superfamily, membe…
GO:1990384	hyaloid vascular plexus regression	0.000203	0.0584	4928	4928	1	1	1	[NINJ1 - ninjurin 1]
GO:0060033	anatomical structure regression	0.000203	0.0569	4928	4928	1	1	1	[NINJ1 - ninjurin 1]
GO:0070372	regulation of ERK1 and ERK2 cascade	0.000214	0.0586	2	4928	85	987	34	[PDGFA - platelet-derived growth factor alpha polypeptide, PRKCDBP - protein kinase c, delta binding protein, ICAM1 - intercellular adhesion molecule 1, CCR7 - chemokine (c-c motif) receptor 7, GPR55 - g protein-coupled receptor 55, NOD1 - nucleotide-binding oligomerization domain containing 1, ABL1 - c-abl oncogene 1, non-receptor tyrosine kinase, CD74 - cd74 molecule, major histocompatibility c…
GO:0002376	immune system process	0.000222	0.0594	1.5	4928	586	522	93	[SIRPA - signal-regulatory protein alpha, NCF2 - neutrophil cytosolic factor 2, CIITA - class ii, major histocompatibility complex, transactivator, F11R - f11 receptor, CD83 - cd83 molecule, MUC19 - mucin 19, oligomeric, SIGLEC14 - sialic acid binding ig-like lectin 14, FUCA1 - fucosidase, alpha-l- 1, tissue, EBI3 - epstein-barr virus induced 3, GEM - gtp binding protein overexpressed in skeletal…
GO:0002696	positive regulation of leukocyte activation	0.000224	0.0585	2.83	4928	102	341	20	[IL4R - interleukin 4 receptor, CCR7 - chemokine (c-c motif) receptor 7, SNX4 - sorting nexin 4, CD83 - cd83 molecule, IL2RA - interleukin 2 receptor, alpha, NCK2 - nck adaptor protein 2, EBI3 - epstein-barr virus induced 3, PRKCZ - protein kinase c, zeta, IL1B - interleukin 1, beta, CD40 - cd40 molecule, tnf receptor superfamily member 5, TNFRSF4 - tumor necrosis factor receptor superfamily, mem…
GO:0070661	leukocyte proliferation	0.000246	0.0628	3.43	4928	30	622	13	[RIPK2 - receptor-interacting serine-threonine kinase 2, EBI3 - epstein-barr virus induced 3, CD40 - cd40 molecule, tnf receptor superfamily member 5, IL23A - interleukin 23, alpha subunit p19, TNFRSF4 - tumor necrosis factor receptor superfamily, member 4, ABL1 - c-abl oncogene 1, non-receptor tyrosine kinase, TNFSF4 - tumor necrosis factor (ligand) superfamily, member 4, BCL2 - b-cell cll/lymph…
GO:0051240	positive regulation of multicellular organismal process	0.000253	0.063	1.6	4928	435	502	71	[VASH2 - vasohibin 2, CTTN - cortactin, CD83 - cd83 molecule, EBI3 - epstein-barr virus induced 3, KDM2B - lysine (k)-specific demethylase 2b, IL23A - interleukin 23, alpha subunit p19, ABL1 - c-abl oncogene 1, non-receptor tyrosine kinase, CD74 - cd74 molecule, major histocompatibility complex, class ii invariant chain, GCNT2 - glucosaminyl (n-acetyl) transferase 2, i-branching enzyme (i blood g…
GO:0042981	regulation of apoptotic process	0.000257	0.0628	1.4	4928	477	876	119	[TNFRSF9 - tumor necrosis factor receptor superfamily, member 9, CTTN - cortactin, BIRC2 - baculoviral iap repeat containing 2, PHLDA3 - pleckstrin homology-like domain, family a, member 3, GADD45A - growth arrest and dna-damage-inducible, alpha, PGAP2 - post-gpi attachment to proteins 2, CARD11 - caspase recruitment domain family, member 11, DDB1 - damage-specific dna binding protein 1, 127kda, …
GO:2000514	regulation of CD4-positive, alpha-beta T cell activation	0.000287	0.0685	4.06	4928	19	639	10	[IL23A - interleukin 23, alpha subunit p19, IL4R - interleukin 4 receptor, MYB - v-myb avian myeloblastosis viral oncogene homolog, TNFSF4 - tumor necrosis factor (ligand) superfamily, member 4, TWSG1 - twisted gastrulation homolog 1 (drosophila), CD83 - cd83 molecule, RIPK2 - receptor-interacting serine-threonine kinase 2, CD86 - cd86 molecule, PRKCZ - protein kinase c, zeta, RARA - retinoic aci…
GO:0042127	regulation of cell proliferation	0.000306	0.0716	1.54	4928	461	564	81	[VASH2 - vasohibin 2, EMD - emerin, SLC6A4 - solute carrier family 6 (neurotransmitter transporter), member 4, EBI3 - epstein-barr virus induced 3, KDM2B - lysine (k)-specific demethylase 2b, FABP6 - fatty acid binding protein 6, ileal, SDC4 - syndecan 4, IL23A - interleukin 23, alpha subunit p19, ABL1 - c-abl oncogene 1, non-receptor tyrosine kinase, CD74 - cd74 molecule, major histocompatibilit…
GO:0043067	regulation of programmed cell death	0.000309	0.0707	1.4	4928	483	877	120	[TNFRSF9 - tumor necrosis factor receptor superfamily, member 9, CTTN - cortactin, BIRC2 - baculoviral iap repeat containing 2, PHLDA3 - pleckstrin homology-like domain, family a, member 3, GADD45A - growth arrest and dna-damage-inducible, alpha, PGAP2 - post-gpi attachment to proteins 2, CARD11 - caspase recruitment domain family, member 11, DDB1 - damage-specific dna binding protein 1, 127kda, …
GO:0032743	positive regulation of interleukin-2 production	0.000312	0.07	4.99	4928	14	564	8	[ABL1 - c-abl oncogene 1, non-receptor tyrosine kinase, TNFSF4 - tumor necrosis factor (ligand) superfamily, member 4, RPS3 - ribosomal protein s3, CD83 - cd83 molecule, RIPK2 - receptor-interacting serine-threonine kinase 2, CD86 - cd86 molecule, IL1B - interleukin 1, beta, IL1A - interleukin 1, alpha]
GO:0010033	response to organic substance	0.000318	0.0701	1.32	4928	604	987	160	[TRIB3 - tribbles homolog 3 (drosophila), TNFRSF9 - tumor necrosis factor receptor superfamily, member 9, EMD - emerin, CIITA - class ii, major histocompatibility complex, transactivator, BIRC2 - baculoviral iap repeat containing 2, CDH1 - cadherin 1, type 1, e-cadherin (epithelial), CD83 - cd83 molecule, ELK1 - elk1, member of ets oncogene family, CDT1 - chromatin licensing and dna replication f…
GO:0051251	positive regulation of lymphocyte activation	0.000323	0.0698	3.24	4928	93	262	16	[IL4R - interleukin 4 receptor, CCR7 - chemokine (c-c motif) receptor 7, CD83 - cd83 molecule, EBI3 - epstein-barr virus induced 3, NCK2 - nck adaptor protein 2, PRKCZ - protein kinase c, zeta, CD40 - cd40 molecule, tnf receptor superfamily member 5, IL1B - interleukin 1, beta, IL23A - interleukin 23, alpha subunit p19, TNFRSF4 - tumor necrosis factor receptor superfamily, member 4, BCL2 - b-cell…
GO:0030010	establishment of cell polarity	0.000324	0.0685	12.17	4928	22	92	5	[CCR7 - chemokine (c-c motif) receptor 7, CYTH3 - cytohesin 3, PAK1 - p21 protein (cdc42/rac)-activated kinase 1, FSCN1 - fascin homolog 1, actin-bundling protein (strongylocentrotus purpuratus), PRKCZ - protein kinase c, zeta]
GO:2000516	positive regulation of CD4-positive, alpha-beta T cell activation	0.000335	0.0696	4.34	4928	16	639	9	[IL23A - interleukin 23, alpha subunit p19, IL4R - interleukin 4 receptor, MYB - v-myb avian myeloblastosis viral oncogene homolog, TNFSF4 - tumor necrosis factor (ligand) superfamily, member 4, CD83 - cd83 molecule, RIPK2 - receptor-interacting serine-threonine kinase 2, CD86 - cd86 molecule, PRKCZ - protein kinase c, zeta, RARA - retinoic acid receptor, alpha]
GO:0034097	response to cytokine	0.000336	0.0686	1.76	4928	133	987	47	[ICAM1 - intercellular adhesion molecule 1, CCR7 - chemokine (c-c motif) receptor 7, WDR35 - wd repeat domain 35, CIITA - class ii, major histocompatibility complex, transactivator, RPL13A - ribosomal protein l13a, JUNB - jun b proto-oncogene, EGR1 - early growth response 1, HTRA2 - htra serine peptidase 2, CXCL16 - chemokine (c-x-c motif) ligand 16, REL - v-rel avian reticuloendotheliosis viral …
GO:0071216	cellular response to biotic stimulus	0.000354	0.071	2.66	4928	55	639	19	[ICAM1 - intercellular adhesion molecule 1, MAPK8 - mitogen-activated protein kinase 8, TNIP1 - tnfaip3 interacting protein 1, IRF8 - interferon regulatory factor 8, RIPK2 - receptor-interacting serine-threonine kinase 2, TLR6 - toll-like receptor 6, BCR - breakpoint cluster region, CD40 - cd40 molecule, tnf receptor superfamily member 5, ABL1 - c-abl oncogene 1, non-receptor tyrosine kinase, CXC…
GO:0046634	regulation of alpha-beta T cell activation	0.000355	0.0699	3.34	4928	30	639	13	[IL4R - interleukin 4 receptor, ITCH - itchy e3 ubiquitin protein ligase, TWSG1 - twisted gastrulation homolog 1 (drosophila), CD83 - cd83 molecule, RIPK2 - receptor-interacting serine-threonine kinase 2, EBI3 - epstein-barr virus induced 3, PRKCZ - protein kinase c, zeta, IL23A - interleukin 23, alpha subunit p19, TNFSF4 - tumor necrosis factor (ligand) superfamily, member 4, MYB - v-myb avian m…
GO:0050865	regulation of cell activation	0.000374	0.0723	1.92	4928	161	639	40	[PDGFA - platelet-derived growth factor alpha polypeptide, ITCH - itchy e3 ubiquitin protein ligase, CCR7 - chemokine (c-c motif) receptor 7, SNX4 - sorting nexin 4, CD83 - cd83 molecule, NCK2 - nck adaptor protein 2, EBI3 - epstein-barr virus induced 3, PRNP - prion protein, SDC4 - syndecan 4, TNFRSF4 - tumor necrosis factor receptor superfamily, member 4, IL23A - interleukin 23, alpha subunit p…
GO:0022407	regulation of cell-cell adhesion	0.000374	0.0712	2.01	4928	134	639	35	[ICAM1 - intercellular adhesion molecule 1, CCR7 - chemokine (c-c motif) receptor 7, ITCH - itchy e3 ubiquitin protein ligase, CDH1 - cadherin 1, type 1, e-cadherin (epithelial), CD83 - cd83 molecule, NCK2 - nck adaptor protein 2, EBI3 - epstein-barr virus induced 3, PRNP - prion protein, SDC4 - syndecan 4, IL23A - interleukin 23, alpha subunit p19, ABL1 - c-abl oncogene 1, non-receptor tyrosine …
GO:0072599	establishment of protein localization to endoplasmic reticulum	0.000384	0.0719	2.42	4928	42	971	20	[SRP54 - signal recognition particle 54kda, RPSA - ribosomal protein sa, RPL22 - ribosomal protein l22, RPS3 - ribosomal protein s3, RPS2 - ribosomal protein s2, RPL21 - ribosomal protein l21, RPLP2 - ribosomal protein, large, p2, RPL13A - ribosomal protein l13a, RPL36A - ribosomal protein l36a, RPL13 - ribosomal protein l13, RPS11 - ribosomal protein s11, RPS8 - ribosomal protein s8, RPL7A - rib…
GO:0006446	regulation of translational initiation	0.000385	0.0709	4.71	4928	23	409	9	[EIF4H - eukaryotic translation initiation factor 4h, EIF4A2 - eukaryotic translation initiation factor 4a2, ATF4 - activating transcription factor 4, EIF5 - eukaryotic translation initiation factor 5, NCK2 - nck adaptor protein 2, RXRA - retinoid x receptor, alpha, RPL13A - ribosomal protein l13a, PPP1R15A - protein phosphatase 1, regulatory subunit 15a, RPS6KB2 - ribosomal protein s6 kinase, 70…
GO:0006413	translational initiation	0.000399	0.0722	4.28	4928	57	222	11	[RPSA - ribosomal protein sa, EIF4A1 - eukaryotic translation initiation factor 4a1, EIF4A2 - eukaryotic translation initiation factor 4a2, RPL23 - ribosomal protein l23, RPS2 - ribosomal protein s2, RPL4 - ribosomal protein l4, RPL13A - ribosomal protein l13a, EIF5 - eukaryotic translation initiation factor 5, RPL3 - ribosomal protein l3, RPL13 - ribosomal protein l13, RPL27A - ribosomal protein…
GO:0042098	T cell proliferation	0.000403	0.0718	4.77	4928	14	590	8	[TNFRSF4 - tumor necrosis factor receptor superfamily, member 4, IL23A - interleukin 23, alpha subunit p19, ABL1 - c-abl oncogene 1, non-receptor tyrosine kinase, TNFSF4 - tumor necrosis factor (ligand) superfamily, member 4, CD151 - cd151 molecule (raph blood group), RIPK2 - receptor-interacting serine-threonine kinase 2, EBI3 - epstein-barr virus induced 3, CD86 - cd86 molecule]
GO:0032663	regulation of interleukin-2 production	0.000431	0.0756	3.95	4928	20	624	10	[ABL1 - c-abl oncogene 1, non-receptor tyrosine kinase, TNFSF4 - tumor necrosis factor (ligand) superfamily, member 4, TNFAIP3 - tumor necrosis factor, alpha-induced protein 3, RPS3 - ribosomal protein s3, CD83 - cd83 molecule, RIPK2 - receptor-interacting serine-threonine kinase 2, CD86 - cd86 molecule, PRNP - prion protein, IL1B - interleukin 1, beta, IL1A - interleukin 1, alpha]
GO:0001829	trophectodermal cell differentiation	0.000432	0.0746	8.94	4928	4	551	4	[ADA - adenosine deaminase, HOPX - hop homeobox, JUNB - jun b proto-oncogene, SRF - serum response factor (c-fos serum response element-binding transcription factor)]
GO:0050729	positive regulation of inflammatory response	0.000471	0.08	4.38	4928	33	341	10	[IL23A - interleukin 23, alpha subunit p19, TLR10 - toll-like receptor 10, CCR7 - chemokine (c-c motif) receptor 7, TNIP1 - tnfaip3 interacting protein 1, SNX4 - sorting nexin 4, NFKBIA - nuclear factor of kappa light polypeptide gene enhancer in b-cells inhibitor, alpha, TLR6 - toll-like receptor 6, MAPK13 - mitogen-activated protein kinase 13, IL1B - interleukin 1, beta, IL17RB - interleukin 17…
GO:0046640	regulation of alpha-beta T cell proliferation	0.000475	0.0795	5.86	4928	8	631	6	[IL23A - interleukin 23, alpha subunit p19, ITCH - itchy e3 ubiquitin protein ligase, TWSG1 - twisted gastrulation homolog 1 (drosophila), TNFSF4 - tumor necrosis factor (ligand) superfamily, member 4, RIPK2 - receptor-interacting serine-threonine kinase 2, EBI3 - epstein-barr virus induced 3]
GO:0042113	B cell activation	0.000502	0.0828	3.76	4928	48	328	12	[SWAP70 - swap switching b-cell complex 70kda subunit, ABL1 - c-abl oncogene 1, non-receptor tyrosine kinase, CASP8 - caspase 8, apoptosis-related cysteine peptidase, BCL2 - b-cell cll/lymphoma 2, CXCR5 - chemokine (c-x-c motif) receptor 5, BATF - basic leucine zipper transcription factor, atf-like, ADA - adenosine deaminase, VCAM1 - vascular cell adhesion molecule 1, CD86 - cd86 molecule, PLCL2 …
GO:0042129	regulation of T cell proliferation	0.000548	0.0891	2.84	4928	44	631	16	[ITCH - itchy e3 ubiquitin protein ligase, TWSG1 - twisted gastrulation homolog 1 (drosophila), RPS3 - ribosomal protein s3, IL2RA - interleukin 2 receptor, alpha, RIPK2 - receptor-interacting serine-threonine kinase 2, NCK2 - nck adaptor protein 2, EBI3 - epstein-barr virus induced 3, PRNP - prion protein, IL1B - interleukin 1, beta, SDC4 - syndecan 4, IL23A - interleukin 23, alpha subunit p19, …
GO:1902107	positive regulation of leukocyte differentiation	0.000593	0.0951	2.91	4928	54	502	16	[IL4R - interleukin 4 receptor, CTNNBIP1 - catenin, beta interacting protein 1, CD83 - cd83 molecule, IL2RA - interleukin 2 receptor, alpha, PRKCZ - protein kinase c, zeta, IL23A - interleukin 23, alpha subunit p19, CD74 - cd74 molecule, major histocompatibility complex, class ii invariant chain, ZBTB46 - zinc finger and btb domain containing 46, MYB - v-myb avian myeloblastosis viral oncogene ho…
GO:0032735	positive regulation of interleukin-12 production	0.000602	0.0952	3.68	4928	13	926	9	[IL23A - interleukin 23, alpha subunit p19, CCL19 - chemokine (c-c motif) ligand 19, MAPK11 - mitogen-activated protein kinase 11, TNFSF4 - tumor necrosis factor (ligand) superfamily, member 4, CCR7 - chemokine (c-c motif) receptor 7, IRF8 - interferon regulatory factor 8, IRF5 - interferon regulatory factor 5, RIPK2 - receptor-interacting serine-threonine kinase 2, CD40 - cd40 molecule, tnf rece…
GO:0008284	positive regulation of cell proliferation	0.000605	0.0942	1.72	4928	243	579	49	[VASH2 - vasohibin 2, EBI3 - epstein-barr virus induced 3, IL23A - interleukin 23, alpha subunit p19, ABL1 - c-abl oncogene 1, non-receptor tyrosine kinase, GCNT2 - glucosaminyl (n-acetyl) transferase 2, i-branching enzyme (i blood group), CD74 - cd74 molecule, major histocompatibility complex, class ii invariant chain, GAB2 - grb2-associated binding protein 2, NOTCH1 - notch 1, SKP2 - s-phase ki…
GO:0007163	establishment or maintenance of cell polarity	0.000606	0.0932	8.46	4928	38	92	6	[CCR7 - chemokine (c-c motif) receptor 7, CYTH3 - cytohesin 3, PAK1 - p21 protein (cdc42/rac)-activated kinase 1, FSCN1 - fascin homolog 1, actin-bundling protein (strongylocentrotus purpuratus), LMNA - lamin a/c, PRKCZ - protein kinase c, zeta]
GO:0048583	regulation of response to stimulus	0.00062	0.094	1.28	4928	1112	633	183	[EMD - emerin, CMTM3 - cklf-like marvel transmembrane domain containing 3, CTTN - cortactin, GPR55 - g protein-coupled receptor 55, PHLDA3 - pleckstrin homology-like domain, family a, member 3, MUC19 - mucin 19, oligomeric, GADD45A - growth arrest and dna-damage-inducible, alpha, PGAP2 - post-gpi attachment to proteins 2, ABL1 - c-abl oncogene 1, non-receptor tyrosine kinase, GAB2 - grb2-associat…
GO:0043370	regulation of CD4-positive, alpha-beta T cell differentiation	0.000626	0.0936	4.08	4928	17	639	9	[IL23A - interleukin 23, alpha subunit p19, IL4R - interleukin 4 receptor, TNFSF4 - tumor necrosis factor (ligand) superfamily, member 4, MYB - v-myb avian myeloblastosis viral oncogene homolog, CD83 - cd83 molecule, RIPK2 - receptor-interacting serine-threonine kinase 2, CD86 - cd86 molecule, PRKCZ - protein kinase c, zeta, RARA - retinoic acid receptor, alpha]
GO:0022409	positive regulation of cell-cell adhesion	0.000638	0.0942	2.36	4928	85	564	23	[ICAM1 - intercellular adhesion molecule 1, IL4R - interleukin 4 receptor, CCR7 - chemokine (c-c motif) receptor 7, RPS3 - ribosomal protein s3, CD83 - cd83 molecule, IL2RA - interleukin 2 receptor, alpha, RIPK2 - receptor-interacting serine-threonine kinase 2, NCK2 - nck adaptor protein 2, EBI3 - epstein-barr virus induced 3, CD44 - cd44 molecule (indian blood group), PRKCZ - protein kinase c, z…
GO:0010875	positive regulation of cholesterol efflux	0.000642	0.0935	79.48	4928	4	31	2	[NFKBIA - nuclear factor of kappa light polypeptide gene enhancer in b-cells inhibitor, alpha, PLTP - phospholipid transfer protein]
GO:0032371	regulation of sterol transport	0.000663	0.0954	28.43	4928	10	52	3	[NFKBIA - nuclear factor of kappa light polypeptide gene enhancer in b-cells inhibitor, alpha, CETP - cholesteryl ester transfer protein, plasma, PLTP - phospholipid transfer protein]
GO:0032374	regulation of cholesterol transport	0.000663	0.0942	28.43	4928	10	52	3	[NFKBIA - nuclear factor of kappa light polypeptide gene enhancer in b-cells inhibitor, alpha, CETP - cholesteryl ester transfer protein, plasma, PLTP - phospholipid transfer protein]
GO:0010646	regulation of cell communication	0.000676	0.0948	1.31	4928	959	633	161	[EMD - emerin, CMTM3 - cklf-like marvel transmembrane domain containing 3, CTTN - cortactin, PNKD - paroxysmal nonkinesigenic dyskinesia, GPR55 - g protein-coupled receptor 55, PHLDA3 - pleckstrin homology-like domain, family a, member 3, GADD45A - growth arrest and dna-damage-inducible, alpha, PGAP2 - post-gpi attachment to proteins 2, ABL1 - c-abl oncogene 1, non-receptor tyrosine kinase, GCNT2…
GO:0048518	positive regulation of biological process	0.000688	0.0953	1.21	4928	1626	634	254	[EMD - emerin, CASZ1 - castor zinc finger 1, CTTN - cortactin, PHLDA3 - pleckstrin homology-like domain, family a, member 3, ELK1 - elk1, member of ets oncogene family, EBI3 - epstein-barr virus induced 3, PLD6 - phospholipase d family, member 6, CENPV - centromere protein v, ABL1 - c-abl oncogene 1, non-receptor tyrosine kinase, GCNT2 - glucosaminyl (n-acetyl) transferase 2, i-branching enzyme (…
GO:0045321	leukocyte activation	0.000693	0.0948	2.08	4928	277	256	30	[SIRPA - signal-regulatory protein alpha, BATF - basic leucine zipper transcription factor, atf-like, GPR84 - g protein-coupled receptor 84, EEF1A1 - eukaryotic translation elongation factor 1 alpha 1, NCK2 - nck adaptor protein 2, FUCA1 - fucosidase, alpha-l- 1, tissue, SIGLEC14 - sialic acid binding ig-like lectin 14, EBI3 - epstein-barr virus induced 3, PLAU - plasminogen activator, urokinase,…
GO:0001954	positive regulation of cell-matrix adhesion	0.000694	0.0938	15.1	4928	15	87	4	[CCR7 - chemokine (c-c motif) receptor 7, GSK3B - glycogen synthase kinase 3 beta, NINJ1 - ninjurin 1, PRKCZ - protein kinase c, zeta]
GO:0045624	positive regulation of T-helper cell differentiation	0.000706	0.0944	4.41	4928	14	639	8	[IL23A - interleukin 23, alpha subunit p19, IL4R - interleukin 4 receptor, TNFSF4 - tumor necrosis factor (ligand) superfamily, member 4, MYB - v-myb avian myeloblastosis viral oncogene homolog, RIPK2 - receptor-interacting serine-threonine kinase 2, CD86 - cd86 molecule, PRKCZ - protein kinase c, zeta, RARA - retinoic acid receptor, alpha]
GO:0030968	endoplasmic reticulum unfolded protein response	0.000725	0.0957	34.46	4928	39	11	3	[CCND1 - cyclin d1, LMNA - lamin a/c, PPP1R15A - protein phosphatase 1, regulatory subunit 15a]
GO:0045630	positive regulation of T-helper 2 cell differentiation	0.000736	0.096	6.43	4928	6	639	5	[IL4R - interleukin 4 receptor, TNFSF4 - tumor necrosis factor (ligand) superfamily, member 4, CD86 - cd86 molecule, PRKCZ - protein kinase c, zeta, RARA - retinoic acid receptor, alpha]
GO:0006493	protein O-linked glycosylation	0.000757	0.0977	3.01	4928	27	787	13	[GCNT3 - glucosaminyl (n-acetyl) transferase 3, mucin type, POFUT1 - protein o-fucosyltransferase 1, MUC19 - mucin 19, oligomeric, GALNT11 - udp-n-acetyl-alpha-d-galactosamine:polypeptide n-acetylgalactosaminyltransferase 11 (galnac-t11), TMEM5 - transmembrane protein 5, GCNT1 - glucosaminyl (n-acetyl) transferase 1, core 2, ST3GAL3 - st3 beta-galactoside alpha-2,3-sialyltransferase 3, GALNT10 - …
GO:0032655	regulation of interleukin-12 production	0.000813	0.104	2.88	4928	24	926	13	[TNFRSF9 - tumor necrosis factor receptor superfamily, member 9, CCL19 - chemokine (c-c motif) ligand 19, MAPK11 - mitogen-activated protein kinase 11, CCR7 - chemokine (c-c motif) receptor 7, IRF8 - interferon regulatory factor 8, RIPK2 - receptor-interacting serine-threonine kinase 2, MAST2 - microtubule associated serine/threonine kinase 2, CD40 - cd40 molecule, tnf receptor superfamily member…
GO:0042108	positive regulation of cytokine biosynthetic process	0.000865	0.109	4.9	4928	23	350	8	[EGR1 - early growth response 1, TLR1 - toll-like receptor 1, TLR6 - toll-like receptor 6, EBI3 - epstein-barr virus induced 3, CD86 - cd86 molecule, CCL20 - chemokine (c-c motif) ligand 20, TNFRSF8 - tumor necrosis factor receptor superfamily, member 8, IL1B - interleukin 1, beta]
GO:0007166	cell surface receptor signaling pathway	0.000899	0.112	1.39	4928	608	647	111	[NCF2 - neutrophil cytosolic factor 2, TNFRSF9 - tumor necrosis factor receptor superfamily, member 9, CIITA - class ii, major histocompatibility complex, transactivator, F11R - f11 receptor, MUC19 - mucin 19, oligomeric, EBI3 - epstein-barr virus induced 3, GEM - gtp binding protein overexpressed in skeletal muscle, DDB1 - damage-specific dna binding protein 1, 127kda, ABL1 - c-abl oncogene 1, n…
GO:0032056	positive regulation of translation in response to stress	0.000918	0.113	43.23	4928	2	114	2	[NCK2 - nck adaptor protein 2, PPP1R15A - protein phosphatase 1, regulatory subunit 15a]
GO:1903912	negative regulation of endoplasmic reticulum stress-induced eIF2 alpha phosphorylation	0.000918	0.112	43.23	4928	2	114	2	[NCK2 - nck adaptor protein 2, PPP1R15A - protein phosphatase 1, regulatory subunit 15a]
GO:0006614	SRP-dependent cotranslational protein targeting to membrane	0.000951	0.115	2.4	4928	38	971	18	[SRP54 - signal recognition particle 54kda, RPSA - ribosomal protein sa, RPL22 - ribosomal protein l22, RPS3 - ribosomal protein s3, RPL21 - ribosomal protein l21, RPS2 - ribosomal protein s2, RPLP2 - ribosomal protein, large, p2, RPL13A - ribosomal protein l13a, RPL36A - ribosomal protein l36a, RPL13 - ribosomal protein l13, RPS11 - ribosomal protein s11, RPL7A - ribosomal protein l7a, RPS8 - ri…
GO:0006613	cotranslational protein targeting to membrane	0.000951	0.113	2.4	4928	38	971	18	[SRP54 - signal recognition particle 54kda, RPSA - ribosomal protein sa, RPL22 - ribosomal protein l22, RPS3 - ribosomal protein s3, RPL21 - ribosomal protein l21, RPS2 - ribosomal protein s2, RPLP2 - ribosomal protein, large, p2, RPL13A - ribosomal protein l13a, RPL36A - ribosomal protein l36a, RPL13 - ribosomal protein l13, RPS11 - ribosomal protein s11, RPS8 - ribosomal protein s8, RPL7A - rib…
GO:0043066	negative regulation of apoptotic process	0.000957	0.113	1.53	4928	262	822	67	[CTTN - cortactin, BIRC2 - baculoviral iap repeat containing 2, PGAP2 - post-gpi attachment to proteins 2, KDM2B - lysine (k)-specific demethylase 2b, DDB1 - damage-specific dna binding protein 1, 127kda, ABL1 - c-abl oncogene 1, non-receptor tyrosine kinase, HERPUD1 - homocysteine-inducible, endoplasmic reticulum stress-inducible, ubiquitin-like domain member 1, CD74 - cd74 molecule, major histo…
GO:0071222	cellular response to lipopolysaccharide	0.000972	0.114	2.82	4928	41	639	15	[ICAM1 - intercellular adhesion molecule 1, MAPK8 - mitogen-activated protein kinase 8, TNIP1 - tnfaip3 interacting protein 1, IRF8 - interferon regulatory factor 8, BCR - breakpoint cluster region, CD40 - cd40 molecule, tnf receptor superfamily member 5, ABL1 - c-abl oncogene 1, non-receptor tyrosine kinase, CXCL16 - chemokine (c-x-c motif) ligand 16, TNFSF4 - tumor necrosis factor (ligand) supe…
GO:0001775	cell activation	0.000984	0.114	1.65	4928	321	503	54	[SIRPA - signal-regulatory protein alpha, SIGLEC14 - sialic acid binding ig-like lectin 14, FUCA1 - fucosidase, alpha-l- 1, tissue, EBI3 - epstein-barr virus induced 3, IL23A - interleukin 23, alpha subunit p19, ABL1 - c-abl oncogene 1, non-receptor tyrosine kinase, CASP8 - caspase 8, apoptosis-related cysteine peptidase, TLR1 - toll-like receptor 1, CHI3L1 - chitinase 3-like 1 (cartilage glycopr…
GO:0050857	positive regulation of antigen receptor-mediated signaling pathway	0.000999	0.114	4.93	4928	13	538	7	[PRKCH - protein kinase c, eta, CCR7 - chemokine (c-c motif) receptor 7, CMTM3 - cklf-like marvel transmembrane domain containing 3, PRKCB - protein kinase c, beta, RPS3 - ribosomal protein s3, ADA - adenosine deaminase, KCNN4 - potassium intermediate/small conductance calcium-activated channel, subfamily n, member 4]

## Sheet: Supplementary Table 5 Peters
Supplementary Table 5 Look up of differetially expressed genes in Peters et al. 2015
Probe2:55A12:562:75A12:2:1232	Chromosome	Symbol	T	P	Direction	Peters et al N	Peters et al_Zscore	Peters et al Direction	Peters et al P
ILMN_1815086	9	NINJ1	12.668	1.67e-31	-	7257	0.088	+	0.93
ILMN_3235325	14	SNHG10	12.5994	3.15e-31	-	NA	NA	NA	NA
ILMN_3236825	7	RAPGEF5	-12.5336	5.8e-31	+	NA	NA	NA	NA
ILMN_1791656	10	EDRF1	-11.7663	6.35e-28	+	NA	NA	NA	NA
ILMN_3238435	10	SNORA12	11.6405	1.96e-27	-	NA	NA	NA	NA
ILMN_1694810	22	PANX2	11.6004	2.8e-27	-	7257	1.851	+	0.0642
ILMN_1684445	1	FCRL5	-11.4986	6.93e-27	+	7257	2.045	+	0.0409
ILMN_1703593	7	BAIAP2L1	11.4693	8.99e-27	-	NA	NA	NA	NA
ILMN_1756049	12	NT5DC3	11.4467	1.1e-26	-	7257	-1.234	-	0.217
ILMN_1736863	7	TMEM140	-11.4201	1.39e-26	+	7257	4.494	+	7.01e-06
ILMN_1688480	11	CCND1	11.3071	3.76e-26	-	7257	-0.327	-	0.744
ILMN_3248223	12	PHB2	11.2618	5.6e-26	-	7257	-2.63	-	0.00854
ILMN_1745820	4	RASSF6	-11.0433	3.77e-25	+	7257	1.181	+	0.238
ILMN_1749368	6	HIST1H3H	-11.0355	4.04e-25	+	7257	-5.663	-	1.49e-08
ILMN_1865764	3	ZMAT3	10.9834	6.34e-25	-	7257	0.667	+	0.505
ILMN_2412139	18	CABYR	10.873	1.65e-24	-	NA	NA	NA	NA
ILMN_1758623	6	HIST1H2BD	-10.8421	2.15e-24	+	7257	-0.656	-	0.512
ILMN_1659936	19	PPP1R15A	10.8386	2.21e-24	-	7257	5.523	+	3.34e-08
ILMN_2105441	4	ENAM	-10.7353	5.37e-24	+	NA	NA	NA	NA
ILMN_1651496	6	HIST1H2BD	-10.6316	1.3e-23	+	NA	NA	NA	NA
ILMN_1657381	4	RASSF6	-10.52	3.35e-23	+	NA	NA	NA	NA
ILMN_1727813	1	MPC2	-10.3847	1.05e-22	+	7257	1.717	+	0.0859
ILMN_1652797	15	FAM174B	10.3334	1.61e-22	-	7257	-1.738	-	0.0823
ILMN_1696749	1	LMNA	10.2823	2.46e-22	-	7257	8.041	+	8.88e-16
ILMN_1729980	7	RNF216	10.2707	2.71e-22	-	7257	-3.582	-	0.00034
ILMN_1751708	13	ITM2B	-10.2508	3.2e-22	+	7257	-3.034	-	0.00242
ILMN_2327860	2	MAL	10.2405	3.49e-22	-	7257	-9.972	-	2.01e-23
ILMN_1715603	12	IL23A	10.2337	3.69e-22	-	7257	-5.534	-	3.13e-08
ILMN_1749403	7	TSPAN33	10.2055	4.67e-22	-	7257	1.414	+	0.157
ILMN_1694799	18	PIAS2	10.1782	5.86e-22	-	7257	0.79	+	0.429
ILMN_1793410	8	MTBP	-10.1284	8.84e-22	+	7257	-4.486	-	7.26e-06
ILMN_3247159	9	HAUS6	10.1172	9.7e-22	-	NA	NA	NA	NA
ILMN_1807667	14	C14orf105	-9.99471	2.66e-21	+	7257	1.376	+	0.169
ILMN_2082762	16	RPL13	9.9327	4.42e-21	-	7257	-7.88	-	3.26e-15
ILMN_2415786	3	CD96	-9.9183	4.97e-21	+	7257	-12.542	-	4.4e-36
ILMN_1681301	1	AIM2	-9.91153	5.25e-21	+	7257	2.525	+	0.0116
ILMN_1815527	11	HBD	-9.86745	7.52e-21	+	7257	2.503	+	0.0123
ILMN_1657234	2	CCL20	9.78494	1.47e-20	-	NA	NA	NA	NA
ILMN_2105223	1	FCRL5	-9.77931	1.54e-20	+	NA	NA	NA	NA
ILMN_1797367	9	TSC1	-9.72721	2.34e-20	+	7257	-2.676	-	0.00746
ILMN_1784985	3	PRRT3	9.71256	2.64e-20	-	7257	-0.562	-	0.574
ILMN_1773389	20	PLTP	9.61125	5.95e-20	-	7257	2.34	+	0.0193
ILMN_1693452	7	GAL3ST4	9.60119	6.44e-20	-	7257	-4.673	-	2.97e-06
ILMN_1799467	7	SAMD9L	-9.59943	6.53e-20	+	7257	5.538	+	3.06e-08
ILMN_1806266	4	RAP1GDS1	-9.55453	9.35e-20	+	7257	1.764	+	0.0778
ILMN_2085862	11	SLC15A3	9.54341	1.02e-19	-	7257	3.325	+	0.000883
ILMN_1708728	12	H2AFJ	-9.53557	1.09e-19	+	7257	1.904	+	0.0569
ILMN_1690566	10	RASSF4	9.52984	1.14e-19	-	7257	6.241	+	4.35e-10
ILMN_1689874	17	HOXB-AS1	-9.48401	1.64e-19	+	NA	NA	NA	NA
ILMN_1803528	3	LRRC31	-9.46192	1.95e-19	+	NA	NA	NA	NA
ILMN_1685856	8	FAM92A	9.43773	2.37e-19	-	NA	NA	NA	NA
ILMN_1792689	6	HIST1H2AC	-9.43609	2.4e-19	+	7257	0.56	+	0.575
ILMN_3248575	1	KIAA0907	9.40843	2.98e-19	-	NA	NA	NA	NA
ILMN_3242586	1	RHOU	-9.35877	4.41e-19	+	NA	NA	NA	NA
ILMN_1784661	9	TMEM2	-9.35438	4.57e-19	+	7257	-0.305	-	0.761
ILMN_2358069	7	MAD1L1	9.33529	5.31e-19	-	7257	-1.83	-	0.0673
ILMN_1715131	17	CCR7	9.32573	5.72e-19	-	7257	-21.138	-	3.59e-99
ILMN_1731644	13	SETDB2	-9.29104	7.51e-19	+	7257	-4.32	-	1.56e-05
ILMN_1698218	9	TRAF1	9.26611	9.13e-19	-	7257	1.234	+	0.217
ILMN_2154603	17	ZNF830	-9.23741	1.14e-18	+	7257	-5.745	-	9.22e-09
ILMN_1751851	22	CECR1	-9.22729	1.24e-18	+	7257	3.603	+	0.000315
ILMN_1707312	9	NFIL3	-9.21342	1.38e-18	+	7257	3.101	+	0.00193
ILMN_1746137	7	ST7	9.21016	1.41e-18	-	7257	4.419	+	9.89e-06
ILMN_1658702	6	HIST1H2BJ	-9.18215	1.76e-18	+	7257	-2.495	-	0.0126
ILMN_3241091	X	TMEM164	9.18223	1.76e-18	-	7257	1.793	+	0.0729
ILMN_1765994	20	ZBP1	-9.15809	2.12e-18	+	7257	10.224	+	1.55e-24
ILMN_1773154	14	NFKBIA	9.11501	2.96e-18	-	7257	0.412	+	0.68
ILMN_1752269	20	ACSS1	-9.10242	3.26e-18	+	7257	-0.568	-	0.57
ILMN_1704353	1	IGSF3	9.0798	3.88e-18	-	NA	NA	NA	NA
ILMN_1779376	3	GSK3B	9.05062	4.86e-18	-	7257	2.993	+	0.00276
ILMN_1794875	4	GPAT3	9.02663	5.85e-18	-	NA	NA	NA	NA
ILMN_1749287	4	TLR6	8.94844	1.06e-17	-	7257	4.07	+	4.71e-05
ILMN_2328094	14	DACT1	-8.93087	1.22e-17	+	7257	-1.496	-	0.135
ILMN_2320330	2	MAL	8.93107	1.22e-17	-	NA	NA	NA	NA
ILMN_2124361	5	LEAP2	-8.90201	1.52e-17	+	7257	-1.826	-	0.0678
ILMN_1713347	3	CHL1	-8.89972	1.54e-17	+	NA	NA	NA	NA
ILMN_3251737	6	EEF1A1	8.8836	1.75e-17	-	7257	-1.405	-	0.16
ILMN_1692698	1	VASH2	8.85212	2.22e-17	-	NA	NA	NA	NA
ILMN_1739576	11	CYB5R2	8.84954	2.26e-17	-	NA	NA	NA	NA
ILMN_2082314	22	TOM1	8.80423	3.19e-17	-	7257	3.893	+	9.9e-05
ILMN_1792951	8	ZHX2	-8.76199	4.38e-17	+	7257	-2.232	-	0.0256
ILMN_1738093	12	RNFT2	8.75431	4.64e-17	-	6376	-3.105	-	0.0019
ILMN_1767509	16	DEF8	-8.74746	4.89e-17	+	7257	3.691	+	0.000224
ILMN_1751120	6	HIST1H4H	-8.74676	4.92e-17	+	7257	4.483	+	7.36e-06
ILMN_1785161	3	CHCHD6	8.72273	5.89e-17	-	6376	-3.221	-	0.00128
ILMN_2083789	14	C14orf105	-8.72167	5.94e-17	+	NA	NA	NA	NA
ILMN_3246206	14	SNORA79	8.71455	6.26e-17	-	NA	NA	NA	NA
ILMN_1753139	16	ZG16B	8.70521	6.72e-17	-	NA	NA	NA	NA
ILMN_1832656	6	HIST1H2BH	-8.66605	9.01e-17	+	NA	NA	NA	NA
ILMN_1723141	10	OTUD1	-8.64213	1.08e-16	+	NA	NA	NA	NA
ILMN_1705686	11	NRGN	-8.63537	1.13e-16	+	7257	1.012	+	0.311
ILMN_3245365	3	RPSA	8.63499	1.14e-16	-	7257	-5.783	-	7.35e-09
ILMN_1718977	19	GADD45B	8.61377	1.33e-16	-	7257	1.655	+	0.098
ILMN_3250902	12	CLEC2D	-8.57766	1.74e-16	+	7257	-8.079	-	6.52e-16
ILMN_1742260	2	SSFA2	-8.56959	1.85e-16	+	7257	2.313	+	0.0207
ILMN_1771084	16	ACSM3	-8.55496	2.06e-16	+	7257	-4.231	-	2.33e-05
ILMN_1789596	12	ETV6	8.55105	2.12e-16	-	7257	5.277	+	1.32e-07
ILMN_1714444	13	KLF12	-8.54449	2.23e-16	+	7257	-7.001	-	2.54e-12
ILMN_1763228	1	MEF2D	8.54015	2.3e-16	-	7257	0.705	+	0.481
ILMN_1801068	14	DACT1	-8.52373	2.6e-16	+	NA	NA	NA	NA
ILMN_1750678	5	TIMD4	-8.5164	2.74e-16	+	7257	-6.563	-	5.29e-11
ILMN_1656057	10	PLAU	8.50771	2.92e-16	-	7257	1.34	+	0.18
ILMN_1804445	16	ATF7IP2	-8.50506	2.98e-16	+	7257	-15.515	-	2.73e-54
ILMN_3245471	17	SCARNA20	8.50363	3.01e-16	-	NA	NA	NA	NA
ILMN_1750864	14	NIN	-8.50159	3.06e-16	+	7257	-4.738	-	2.16e-06
ILMN_1814726	4	SCARB2	-8.49453	3.22e-16	+	7257	3.591	+	0.00033
ILMN_1722811	12	CDKN1B	-8.48286	3.51e-16	+	7257	-4.31	-	1.64e-05
ILMN_3235096	14	EIF5	8.46856	3.9e-16	-	7257	-1.492	-	0.136
ILMN_1788108	6	TXNDC5	-8.44793	4.54e-16	+	7257	-6.899	-	5.25e-12
ILMN_1801246	11	IFITM2	-8.39931	6.49e-16	+	7257	4.406	+	1.05e-05
ILMN_1750321	3	TRANK1	-8.39092	6.9e-16	+	NA	NA	NA	NA
ILMN_1781431	7	GLCCI1	-8.38894	7e-16	+	7257	-0.229	-	0.819
ILMN_1662470	10	C10orf35	8.38211	7.36e-16	-	7257	-8.664	-	4.54e-18
ILMN_2083833	4	CNOT6L	-8.37068	8e-16	+	7257	-1.325	-	0.185
ILMN_2256359	19	ZNF823	-8.35748	8.81e-16	+	NA	NA	NA	NA
ILMN_1789233	11	VPS37C	8.35624	8.89e-16	-	7257	0.459	+	0.646
ILMN_1697220	6	NT5E	-8.34874	9.39e-16	+	7257	-17.453	-	3.29e-68
ILMN_2152581	6	STK38	-8.34335	9.76e-16	+	7257	1.479	+	0.139
ILMN_3247636	15	SCARNA14	8.33835	1.01e-15	-	NA	NA	NA	NA
ILMN_1732071	1	HIST2H2BE	-8.33478	1.04e-15	+	7257	-2.034	-	0.042
ILMN_1766573	3	TERC	8.32968	1.08e-15	-	NA	NA	NA	NA
ILMN_1894388	4	RAP1GDS1	-8.31563	1.19e-15	+	NA	NA	NA	NA
ILMN_1657129	7	SKAP2	-8.315	1.2e-15	+	7257	2.416	+	0.0157
ILMN_1686645	13	UTP14C	-8.30047	1.33e-15	+	NA	NA	NA	NA
ILMN_1683313	8	ST3GAL1	-8.29794	1.36e-15	+	7257	-2.159	-	0.0309
ILMN_2374340	19	PLAUR	8.28025	1.54e-15	-	7257	7.335	+	2.21e-13
ILMN_1681882	16	CETP	8.27894	1.56e-15	-	7257	6.718	+	1.84e-11
ILMN_1780582	6	CD83	8.26723	1.7e-15	-	7257	-5.64	-	1.7e-08
ILMN_1700733	15	FAM214A	-8.26483	1.73e-15	+	NA	NA	NA	NA
ILMN_1814686	16	BCO1	-8.24409	2.01e-15	+	NA	NA	NA	NA
ILMN_2323048	12	ERP29	-8.24133	2.05e-15	+	7257	-4.588	-	4.48e-06
ILMN_2184373	4	CXCL8	8.23545	2.14e-15	-	NA	NA	NA	NA
ILMN_1661197	11	CLCF1	-8.23413	2.16e-15	+	7257	2.432	+	0.015
ILMN_1674661	19	CIRBP	8.21406	2.49e-15	-	7257	-3.314	-	0.000921
ILMN_1684271	1	ACBD6	8.20727	2.62e-15	-	7257	-4.384	-	1.17e-05
ILMN_2106167	4	RAP1GDS1	-8.19473	2.86e-15	+	NA	NA	NA	NA
ILMN_2367141	5	TCF7	8.17941	3.2e-15	-	7257	-13.33	-	1.55e-40
ILMN_1676470	5	TCF7	8.1653	3.54e-15	-	7257	-8.459	-	2.69e-17
ILMN_2366719	20	NSFL1C	8.16428	3.56e-15	-	7257	5.016	+	5.29e-07
ILMN_1699695	6	TNFRSF21	-8.16009	3.67e-15	+	7257	-5.995	-	2.04e-09
ILMN_1758146	20	SIRPA	8.15416	3.83e-15	-	6376	-0.278	-	0.781
ILMN_1753639	9	MTAP	-8.13373	4.44e-15	+	7257	-6.002	-	1.95e-09
ILMN_1698484	15	RHOV	8.12771	4.63e-15	-	NA	NA	NA	NA
ILMN_1682402	1	SNORD46	8.11483	5.08e-15	-	NA	NA	NA	NA
ILMN_2328666	6	CD83	8.10958	5.27e-15	-	NA	NA	NA	NA
ILMN_3244343	17	RPL23	8.07815	6.6e-15	-	7257	-2.263	-	0.0236
ILMN_1763605	20	DIDO1	-8.06546	7.22e-15	+	7257	-2.99	-	0.00279
ILMN_1705390	22	KLHL22	8.06178	7.42e-15	-	7257	-4.279	-	1.88e-05
ILMN_1756238	6	TMEM217	-8.04066	8.62e-15	+	7257	2.992	+	0.00277
ILMN_1757406	6	HIST1H1C	-8.01651	1.02e-14	+	7257	1.81	+	0.0703
ILMN_1737394	1	LMNA	8.01379	1.04e-14	-	NA	NA	NA	NA
ILMN_1713807	1	MAN1C1	-8.00478	1.11e-14	+	7257	-10.499	-	8.69e-26
ILMN_1808707	7	FSCN1	7.99698	1.17e-14	-	6376	2.993	+	0.00277
ILMN_1715173	1	RPS6KA1	7.96267	1.5e-14	-	7257	5.322	+	1.03e-07
ILMN_3235264	17	EIF4A1	7.94969	1.64e-14	-	6376	-3.641	-	0.000272
ILMN_1714349	15	GLCE	-7.9425	1.72e-14	+	6376	0.436	+	0.663
ILMN_2369666	1	CR2	7.93329	1.84e-14	-	7257	-16.293	-	1.1e-59
ILMN_1675191	5	GAPT	-7.91031	2.16e-14	+	7257	4.036	+	5.44e-05
ILMN_1763452	17	EVI2B	-7.90957	2.17e-14	+	7257	0.099	+	0.921
ILMN_3237448	1	BEND5	-7.90886	2.18e-14	+	7257	-6.058	-	1.38e-09
ILMN_2246510	9	TSC1	-7.9094	2.18e-14	+	NA	NA	NA	NA
ILMN_2395214	12	PRPF40B	7.90762	2.2e-14	-	NA	NA	NA	NA
ILMN_1669113	19	ATF5	7.90237	2.29e-14	-	7257	1.296	+	0.195
ILMN_1744118	9	ASTN2	7.90039	2.32e-14	-	NA	NA	NA	NA
ILMN_1857335	9	NALT1	7.89518	2.4e-14	-	NA	NA	NA	NA
ILMN_1692650	7	RCC1L	7.8842	2.6e-14	-	NA	NA	NA	NA
ILMN_3237956	11	ZC3H12C	7.85368	3.21e-14	-	NA	NA	NA	NA
ILMN_2043918	13	DLEU1	-7.85041	3.29e-14	+	7257	-1.083	-	0.279
ILMN_1716382	12	C12orf75	-7.84837	3.34e-14	+	7257	5.684	+	1.32e-08
ILMN_1690253	10	SYNPO2L	7.84756	3.35e-14	-	NA	NA	NA	NA
ILMN_1662741	19	LPAR2	7.84297	3.46e-14	-	7257	-0.725	-	0.468
ILMN_1659913	15	ISG20	-7.82641	3.89e-14	+	6376	-0.476	-	0.634
ILMN_1860638	8	ST3GAL1	-7.82033	4.06e-14	+	NA	NA	NA	NA
ILMN_1763080	3	QARS	7.81937	4.08e-14	-	7257	-4.978	-	6.42e-07
ILMN_1696590	16	CHST4	7.81669	4.16e-14	-	NA	NA	NA	NA
ILMN_1663538	13	CLYBL	7.81568	4.19e-14	-	7257	-6.924	-	4.38e-12
ILMN_1726456	11	SLC3A2	7.80238	4.6e-14	-	7257	2.525	+	0.0116
ILMN_1671478	14	CKB	7.79385	4.88e-14	-	7257	4.664	+	3.1e-06
ILMN_2233783	4	CD38	-7.79329	4.9e-14	+	7257	-3.891	-	9.99e-05
ILMN_1683694	17	SLC6A4	7.78934	5.03e-14	-	7257	1.492	+	0.136
ILMN_1684724	1	CR2	7.78803	5.08e-14	-	NA	NA	NA	NA
ILMN_1721669	20	IDH3B	7.77713	5.48e-14	-	7257	-2.593	-	0.00951
ILMN_1699925	15	TGM5	7.776	5.52e-14	-	NA	NA	NA	NA
ILMN_1782050	8	CEBPD	-7.75853	6.23e-14	+	7257	3.348	+	0.000815
ILMN_1742705	17	SLC39A11	7.74779	6.71e-14	-	7257	3.226	+	0.00126
ILMN_1728071	12	KRAS	-7.74671	6.76e-14	+	7257	1.715	+	0.0863
ILMN_1659106	1	PHLDA3	7.73861	7.15e-14	-	NA	NA	NA	NA
ILMN_1670134	11	FADS2	-7.73707	7.22e-14	+	NA	NA	NA	NA
ILMN_1806293	12	LIN7A	-7.73416	7.37e-14	+	7257	4.424	+	9.7e-06
ILMN_2289593	11	FXYD2	-7.72806	7.69e-14	+	7257	-3.664	-	0.000249
ILMN_1736911	9	TMOD1	7.71651	8.33e-14	-	7257	0.748	+	0.454
ILMN_1651832	11	EHD1	7.70617	8.94e-14	-	7257	4.514	+	6.36e-06
ILMN_1726417	2	MRPL33	-7.70217	9.19e-14	+	6376	-0.751	-	0.453
ILMN_1814305	7	SAMD9	-7.69909	9.39e-14	+	7257	1.619	+	0.105
ILMN_1767365	11	PAK1	7.69597	9.59e-14	-	7257	3.339	+	0.00084
ILMN_1774742	4	MTTP	-7.69049	9.96e-14	+	NA	NA	NA	NA
ILMN_1750181	12	TESC	7.68818	1.01e-13	-	7257	0.5	+	0.617
ILMN_1726815	6	HIST1H3G	-7.68622	1.03e-13	+	NA	NA	NA	NA
ILMN_2386982	1	PRKCZ	7.66605	1.18e-13	-	7257	1.136	+	0.256
ILMN_1821280	12	SARNP	-7.66365	1.2e-13	+	7257	1.285	+	0.199
ILMN_1723020	5	MAP3K1	-7.65214	1.3e-13	+	NA	NA	NA	NA
ILMN_1705310	17	VEZF1	-7.64054	1.4e-13	+	7257	-0.728	-	0.467
ILMN_1733579	17	EVI2A	-7.63914	1.42e-13	+	7257	0.91	+	0.363
ILMN_1702175	7	ST7	7.63664	1.44e-13	-	NA	NA	NA	NA
ILMN_1734198	6	RNGTT	-7.6347	1.46e-13	+	7257	-4.705	-	2.54e-06
ILMN_1703123	3	CSRNP1	7.63046	1.5e-13	-	7257	1.182	+	0.237
ILMN_1786050	20	RBBP9	7.62194	1.59e-13	-	7257	-3.049	-	0.0023
ILMN_2038775	6	TUBB2A	7.6117	1.71e-13	-	NA	NA	NA	NA
ILMN_1697267	1	PRKCZ	7.5968	1.89e-13	-	NA	NA	NA	NA
ILMN_1819494	5	TNFAIP8	-7.58443	2.06e-13	+	7257	-7.133	-	9.81e-13
ILMN_1684873	X	ARSD	-7.57606	2.18e-13	+	7257	2.847	+	0.00442
ILMN_1664922	3	FLNB	7.57502	2.19e-13	-	7257	-15.78	-	4.26e-56
ILMN_1799082	15	ZNF609	-7.56837	2.3e-13	+	NA	NA	NA	NA
ILMN_1677098	17	YPEL2	-7.55874	2.45e-13	+	7257	2.434	+	0.0149
ILMN_2160727	7	CYTH3	7.55605	2.5e-13	-	7257	-1.181	-	0.238
ILMN_1651433	4	DCK	-7.5494	2.61e-13	+	6376	-6.87	-	6.41e-12
ILMN_1699980	11	TSPAN18	7.53551	2.87e-13	-	7257	-4.866	-	1.14e-06
ILMN_1757408	19	ZNF256	7.535	2.88e-13	-	7257	-11.172	-	5.59e-29
ILMN_1670638	17	PITPNC1	7.53402	2.9e-13	-	7257	-6.571	-	5.01e-11
ILMN_1669598	11	KMT5B	7.53267	2.92e-13	-	NA	NA	NA	NA
ILMN_1675024	1	BEND5	-7.53237	2.93e-13	+	NA	NA	NA	NA
ILMN_1732410	10	SLC16A9	7.53143	2.95e-13	-	NA	NA	NA	NA
ILMN_1668822	14	BATF	7.52876	3e-13	-	7257	9.018	+	1.92e-19
ILMN_3249167	3	EIF4A2	7.52271	3.13e-13	-	7257	-8.599	-	8.05e-18
ILMN_2098013	16	CETP	7.5213	3.16e-13	-	NA	NA	NA	NA
ILMN_1781752	16	CLEC16A	7.52001	3.19e-13	-	NA	NA	NA	NA
ILMN_1660871	9	NEK6	7.51517	3.29e-13	-	7257	3.409	+	0.000653
ILMN_1651819	7	GALNT11	7.50558	3.51e-13	-	7257	1.764	+	0.0778
ILMN_1760556	1	RSRP1	-7.48957	3.91e-13	+	NA	NA	NA	NA
ILMN_1677402	11	C11orf96	7.47838	4.22e-13	-	NA	NA	NA	NA
ILMN_1778444	6	FKBP5	7.45292	5.01e-13	-	7257	3.838	+	0.000124
ILMN_1733690	6	AKAP7	-7.44636	5.23e-13	+	7257	-6.621	-	3.56e-11
ILMN_2102960	15	FAM214A	-7.4409	5.43e-13	+	NA	NA	NA	NA
ILMN_1723912	1	IFI44L	-7.41505	6.46e-13	+	7257	1.817	+	0.0692
ILMN_1782389	1	LAD1	7.41076	6.64e-13	-	NA	NA	NA	NA
ILMN_1662038	22	LARGE1	7.40685	6.82e-13	-	NA	NA	NA	NA
ILMN_3235969	7	SNHG15	7.40584	6.87e-13	-	NA	NA	NA	NA
ILMN_1783798	16	GAS8	-7.39847	7.21e-13	+	7257	0.8	+	0.424
ILMN_2345564	15	TGM5	7.39691	7.29e-13	-	NA	NA	NA	NA
ILMN_1652128	6	LMBRD1	-7.3916	7.55e-13	+	7257	-0.77	-	0.441
ILMN_1664047	1	CACNA1E	7.38643	7.82e-13	-	7257	4.333	+	1.47e-05
ILMN_1787280	1	AUNIP	7.38617	7.83e-13	-	NA	NA	NA	NA
ILMN_1782729	12	CLECL1	-7.3831	7.99e-13	+	7257	-1.387	-	0.165
ILMN_1689212	6	RSPH4A	-7.37257	8.58e-13	+	NA	NA	NA	NA
ILMN_1805158	1	TAF1A	-7.36072	9.28e-13	+	7257	-1.192	-	0.233
ILMN_2367818	20	CD40	7.35985	9.33e-13	-	7257	-3.904	-	9.44e-05
ILMN_1685679	6	RNF146	-7.3596	9.35e-13	+	6376	3.097	+	0.00196
ILMN_1662795	8	CA2	-7.35937	9.36e-13	+	7257	-0.695	-	0.487
ILMN_1797359	11	TRIM5	-7.35388	9.71e-13	+	7257	1.967	+	0.0491
ILMN_1732981	19	ZBTB32	7.35182	9.85e-13	-	7257	1.488	+	0.137
ILMN_1691731	3	PARP14	-7.35058	9.93e-13	+	7257	5.256	+	1.47e-07
ILMN_1812278	1	LY9	7.34773	1.01e-12	-	7257	-10.365	-	3.56e-25
ILMN_1677824	1	RAB4A	-7.34329	1.04e-12	+	7257	-0.34	-	0.734
ILMN_1912287	3	SUCNR1	-7.34175	1.05e-12	+	7257	5.241	+	1.6e-07
ILMN_1677085	20	RGS19	-7.3353	1.1e-12	+	7257	1.493	+	0.135
ILMN_2160476	16	CCL22	7.32737	1.16e-12	-	NA	NA	NA	NA
ILMN_1676528	6	BTN3A2	-7.32146	1.2e-12	+	7257	3.817	+	0.000135
ILMN_1653432	4	HNRNPDL	-7.32075	1.21e-12	+	NA	NA	NA	NA
ILMN_1765310	X	TCEAL2	7.32011	1.22e-12	-	7257	1.695	+	0.0901
ILMN_2337928	11	CXCR5	7.317	1.24e-12	-	7257	-10.913	-	9.98e-28
ILMN_1730931	4	RUFY3	-7.31614	1.25e-12	+	7257	-2.234	-	0.0255
ILMN_1709604	16	RPS2	7.3151	1.26e-12	-	7257	-6.475	-	9.51e-11
ILMN_1712088	13	CLYBL	7.31158	1.29e-12	-	NA	NA	NA	NA
ILMN_1724718	2	NCK2	7.30747	1.32e-12	-	7257	-1.556	-	0.12
ILMN_1747281	19	EVI5L	7.30684	1.33e-12	-	7257	3.085	+	0.00204
ILMN_1730351	17	TEX19	-7.30628	1.33e-12	+	NA	NA	NA	NA
ILMN_1802653	19	EBI3	7.30271	1.36e-12	-	7257	-0.971	-	0.331
ILMN_1786429	13	LPAR6	-7.28619	1.52e-12	+	7257	4.993	+	5.94e-07
ILMN_2409167	15	ANXA2	-7.28218	1.56e-12	+	7257	9.998	+	1.55e-23
ILMN_1768751	2	MTA3	7.2819	1.57e-12	-	7257	-8.902	-	5.46e-19
ILMN_2352090	17	GPRC5C	7.27929	1.59e-12	-	7257	1.221	+	0.222
ILMN_1719695	3	NFKBIZ	7.23543	2.13e-12	-	7257	3.066	+	0.00217
ILMN_1657871	2	RSAD2	-7.23456	2.14e-12	+	7257	4.356	+	1.33e-05
ILMN_1716468	3	NUDT16P1	-7.23256	2.17e-12	+	7257	4.798	+	1.6e-06
ILMN_1659270	5	OTP	7.23207	2.17e-12	-	7257	-0.634	-	0.526
ILMN_1719097	18	C18orf8	-7.23062	2.19e-12	+	7257	3.355	+	0.000793
ILMN_1686152	16	GGA2	7.22845	2.23e-12	-	7257	-1.473	-	0.141
ILMN_1715273	11	PICALM	-7.21913	2.37e-12	+	7257	-1.817	-	0.0692
ILMN_1797191	1	KIAA0040	-7.21626	2.41e-12	+	7257	1.409	+	0.159
ILMN_1713058	18	PSTPIP2	7.21325	2.46e-12	-	7257	9.573	+	1.04e-21
ILMN_3242271	5	GAPT	-7.21233	2.47e-12	+	NA	NA	NA	NA
ILMN_1664776	8	EFR3A	-7.20722	2.56e-12	+	NA	NA	NA	NA
ILMN_2298366	4	TLR10	7.20153	2.66e-12	-	7257	-6.695	-	2.16e-11
ILMN_1829989	10	ZEB1-AS1	-7.19876	2.7e-12	+	NA	NA	NA	NA
ILMN_1798964	19	LINC01869	7.19851	2.71e-12	-	NA	NA	NA	NA
ILMN_1727080	6	MYO6	-7.19825	2.71e-12	+	NA	NA	NA	NA
ILMN_1685540	4	SHROOM3	-7.19685	2.74e-12	+	7257	-0.322	-	0.747
ILMN_1762071	17	C17orf80	-7.19038	2.86e-12	+	7257	-2.415	-	0.0158
ILMN_2150654	19	ZSWIM4	7.18932	2.88e-12	-	NA	NA	NA	NA
ILMN_1690921	12	STAT2	-7.18538	2.95e-12	+	7257	5.298	+	1.17e-07
ILMN_1744912	11	CTTN	7.1795	3.07e-12	-	7257	3.262	+	0.00111
ILMN_1791575	2	HNRNPLL	7.17639	3.13e-12	-	7257	2.657	+	0.00787
ILMN_3241373	5	SCARNA18	7.16212	3.44e-12	-	NA	NA	NA	NA
ILMN_2317658	11	SLC3A2	7.13487	4.1e-12	-	NA	NA	NA	NA
ILMN_1754579	14	SYNE2	-7.12882	4.27e-12	+	7257	4.628	+	3.7e-06
ILMN_1698766	16	PYCARD	-7.12408	4.4e-12	+	7257	4.86	+	1.17e-06
ILMN_2381697	5	P4HA2-AS1	7.12286	4.44e-12	-	NA	NA	NA	NA
ILMN_1781472	1	CDC42BPA	-7.11832	4.57e-12	+	NA	NA	NA	NA
ILMN_1755383	6	LRRC1	-7.11039	4.81e-12	+	7257	-2.793	-	0.00522
ILMN_3246935	5	SNORA74B	7.10743	4.9e-12	-	NA	NA	NA	NA
ILMN_2047112	10	DPCD	7.09305	5.38e-12	-	7257	1.103	+	0.27
ILMN_1772487	19	SUGP2	7.08631	5.62e-12	-	7257	1.768	+	0.077
ILMN_1803652	9	TMEM268	7.0861	5.63e-12	-	NA	NA	NA	NA
ILMN_2204876	14	FLVCR2	7.08451	5.69e-12	-	7257	6.874	+	6.24e-12
ILMN_2165762	19	RPL13A	7.08028	5.85e-12	-	NA	NA	NA	NA
ILMN_1678690	22	UPB1	7.07979	5.87e-12	-	7257	-1.741	-	0.0818
ILMN_1713266	1	FAM46C	-7.07664	5.99e-12	+	7257	3.63	+	0.000283
ILMN_1695706	17	H3F3B	7.06771	6.34e-12	-	6376	-2.08	-	0.0375
ILMN_1736178	7	AEBP1	-7.06754	6.35e-12	+	7257	-4.588	-	4.47e-06
ILMN_1776519	1	RAP1GAP	7.06252	6.56e-12	-	7257	3.606	+	0.000311
ILMN_1664698	17	UNC119	7.05858	6.73e-12	-	7257	2.298	+	0.0215
ILMN_1669064	19	ZNF823	-7.05571	6.85e-12	+	NA	NA	NA	NA
ILMN_1787567	13	TSC22D1	-7.05424	6.92e-12	+	6376	1.449	+	0.147
ILMN_1781281	17	B9D1	7.05423	6.92e-12	-	NA	NA	NA	NA
ILMN_2110167	9	POLR1E	7.05271	6.99e-12	-	7257	-10.564	-	4.4e-26
ILMN_1751400	17	SKAP1	7.0515	7.04e-12	-	7257	-2.571	-	0.0102
ILMN_1746864	2	CYTIP	-7.04968	7.12e-12	+	NA	NA	NA	NA
ILMN_1696126	4	STX18	7.04781	7.21e-12	-	7257	0.365	+	0.715
ILMN_1713688	10	DHX32	7.04627	7.28e-12	-	7257	-2.92	-	0.0035
ILMN_2165473	X	MID1IP1	-7.04158	7.51e-12	+	7257	1.802	+	0.0716
ILMN_1659544	11	STX3	7.04002	7.58e-12	-	7257	0.888	+	0.374
ILMN_1775501	2	IL1B	7.03212	7.98e-12	-	7257	-4.344	-	1.4e-05
ILMN_2370825	11	ATM	-7.0309	8.04e-12	+	7257	-13.685	-	1.25e-42
ILMN_2309926	6	ZDHHC14	-7.02784	8.2e-12	+	7257	-1.174	-	0.24
ILMN_3243117	14	TTC9	-7.0179	8.74e-12	+	NA	NA	NA	NA
ILMN_1800787	3	RFTN1	7.01388	8.97e-12	-	7257	-0.948	-	0.343
ILMN_2398572	11	FXYD2	-7.00977	9.21e-12	+	NA	NA	NA	NA
ILMN_2081682	1	SMAP2	7.00694	9.38e-12	-	7257	4.636	+	3.55e-06
ILMN_2390453	6	BCKDHB	7.0064	9.41e-12	-	7257	-8.655	-	4.92e-18
ILMN_1794056	9	DNAJB5	7.00216	9.67e-12	-	7257	2.262	+	0.0237
ILMN_1681542	6	HIST1H4E	-6.99818	9.92e-12	+	7257	-1.067	-	0.286
ILMN_1882764	7	UMAD1	-6.99685	1e-11	+	NA	NA	NA	NA
ILMN_1668417	2	WIPF1	-6.99438	1.02e-11	+	7257	2.469	+	0.0136
ILMN_1760062	1	IFI44	-6.99154	1.04e-11	+	7257	1.315	+	0.189
ILMN_1656628	21	WDR4	-6.98793	1.06e-11	+	7257	-7.786	-	6.89e-15
ILMN_2199439	8	CA2	-6.9859	1.07e-11	+	NA	NA	NA	NA
ILMN_1742601	1	CR1	6.98521	1.08e-11	-	7257	4.626	+	3.73e-06
ILMN_1753342	X	SAT1	-6.97629	1.14e-11	+	7257	4.703	+	2.56e-06
ILMN_1803398	6	SRF	6.96844	1.2e-11	-	6376	0.768	+	0.442
ILMN_1682727	7	TAX1BP1	-6.96435	1.23e-11	+	7257	1.349	+	0.177
ILMN_2381064	8	TPD52	-6.95845	1.28e-11	+	7257	-7.093	-	1.31e-12
ILMN_1708041	19	PLEKHF1	6.95116	1.34e-11	-	7257	6.04	+	1.54e-09
ILMN_1794782	21	ABCG1	-6.94422	1.4e-11	+	7257	4.818	+	1.45e-06
ILMN_3250870	4	USP46	6.93692	1.47e-11	-	7257	2.197	+	0.0281
ILMN_1747052	2	ITGA4	-6.93583	1.48e-11	+	7257	-1.996	-	0.0459
ILMN_1679092	X	RAB9B	-6.93516	1.48e-11	+	6376	-1.077	-	0.281
ILMN_2396020	12	DUSP6	-6.93067	1.53e-11	+	7257	2.837	+	0.00455
ILMN_1725130	X	FAM50A	6.92725	1.56e-11	-	7257	4.125	+	3.7e-05
ILMN_2391419	14	SYNE2	-6.89342	1.93e-11	+	NA	NA	NA	NA
ILMN_1762803	15	RFX7	-6.88913	1.99e-11	+	7257	-4.086	-	4.38e-05
ILMN_1787251	14	DAAM1	-6.88615	2.03e-11	+	7257	-3.931	-	8.47e-05
ILMN_1693664	1	POMGNT1	6.88511	2.04e-11	-	7257	-0.765	-	0.444
ILMN_1764609	10	PWWP2B	-6.88379	2.06e-11	+	7257	2.645	+	0.00816
ILMN_1881081	6	HIST1H3E	-6.88208	2.08e-11	+	NA	NA	NA	NA
ILMN_1727689	14	TNFAIP2	6.87711	2.14e-11	-	7257	1.993	+	0.0462
ILMN_1749081	7	AUTS2	6.8764	2.15e-11	-	7257	-5.971	-	2.36e-09
ILMN_1810191	19	PLA2G4C	6.87412	2.19e-11	-	7257	2.791	+	0.00525
ILMN_1787843	9	HSDL2	6.86937	2.25e-11	-	7257	-0.891	-	0.373
ILMN_1749915	1	RSRP1	-6.86838	2.27e-11	+	NA	NA	NA	NA
ILMN_1730995	10	AFAP1L2	6.86652	2.29e-11	-	7257	1.203	+	0.229
ILMN_1752728	1	FUCA1	6.86693	2.29e-11	-	7257	-0.735	-	0.462
ILMN_1746206	17	CEP131	6.86649	2.29e-11	-	NA	NA	NA	NA
ILMN_1655844	1	TAF1A	-6.86455	2.32e-11	+	NA	NA	NA	NA
ILMN_1697975	7	PHF14	6.85789	2.42e-11	-	7257	-6.92	-	4.51e-12
ILMN_1689400	2	CLK1	-6.85404	2.48e-11	+	7257	-3.643	-	0.000269
ILMN_3244157	22	RPL3	6.85396	2.48e-11	-	NA	NA	NA	NA
ILMN_1794781	9	VAV2	6.84736	2.59e-11	-	7257	0.508	+	0.611
ILMN_1758323	3	ACPP	-6.84429	2.64e-11	+	7257	3.027	+	0.00247
ILMN_2306540	21	PDE9A	6.82837	2.92e-11	-	7257	-17.21	-	2.22e-66
ILMN_1747650	6	BMP6	-6.8198	3.08e-11	+	7257	0.545	+	0.586
ILMN_1727402	3	HCLS1	6.81	3.27e-11	-	7257	2.583	+	0.0098
ILMN_1732926	8	PVT1	6.80501	3.38e-11	-	NA	NA	NA	NA
ILMN_1774312	13	MRPL57	-6.80279	3.42e-11	+	NA	NA	NA	NA
ILMN_1874689	9	MIR181A2HG	-6.79685	3.55e-11	+	NA	NA	NA	NA
ILMN_1763386	22	BID	6.79502	3.6e-11	-	7257	-1.256	-	0.209
ILMN_1794106	11	FEZ1	6.79084	3.69e-11	-	7257	7.247	+	4.27e-13
ILMN_1665554	8	ADGRA2	6.78721	3.78e-11	-	NA	NA	NA	NA
ILMN_2331266	14	NUMB	-6.7753	4.07e-11	+	7257	0.633	+	0.526
ILMN_1655225	19	C19orf25	-6.77538	4.07e-11	+	7257	-0.21	-	0.834
ILMN_1679640	3	FXR1	-6.76607	4.31e-11	+	7257	-5.219	-	1.8e-07
ILMN_1710495	14	PAPLN	6.76233	4.41e-11	-	NA	NA	NA	NA
ILMN_1740466	6	FAM46A	-6.75448	4.63e-11	+	7257	6.904	+	5.07e-12
ILMN_1676058	12	MAGOHB	6.74957	4.78e-11	-	NA	NA	NA	NA
ILMN_1691930	22	CBX6	6.74912	4.79e-11	-	7257	1.513	+	0.13
ILMN_2277676	19	CD3EAP	6.74608	4.88e-11	-	7257	1.472	+	0.141
ILMN_1699665	21	CLIC6	6.74233	5e-11	-	7257	0.154	+	0.878
ILMN_2351298	2	WIPF1	-6.74001	5.07e-11	+	7257	-0.035	-	0.972
ILMN_1736729	12	OAS2	-6.73891	5.11e-11	+	7257	1.467	+	0.143
ILMN_2393712	11	CTTN	6.73822	5.13e-11	-	NA	NA	NA	NA
ILMN_1699472	1	ST3GAL3	6.73254	5.31e-11	-	7257	-1.057	-	0.291
ILMN_1678833	3	CCR3	-6.7274	5.48e-11	+	7257	0.138	+	0.89
ILMN_1749327	6	MAPK13	6.72733	5.49e-11	-	7257	1.045	+	0.296
ILMN_2115696	7	USP42	-6.70612	6.26e-11	+	NA	NA	NA	NA
ILMN_1690646	3	SATB1	-6.70498	6.3e-11	+	7257	-13.046	-	6.66e-39
ILMN_2125010	7	SKAP2	-6.70324	6.37e-11	+	NA	NA	NA	NA
ILMN_1691436	7	BLVRA	6.69645	6.65e-11	-	7257	3.956	+	7.63e-05
ILMN_3241985	5	EPB41L4A-A	6.69029	6.9e-11	-	7257	-10.271	-	9.49e-25
ILMN_1679041	11	SLC3A2	6.6866	7.06e-11	-	NA	NA	NA	NA
ILMN_1721127	6	HIST1H3D	-6.68493	7.14e-11	+	7257	1.94	+	0.0523
ILMN_2142554	1	NENF	6.68134	7.3e-11	-	7257	2.729	+	0.00636
ILMN_1680874	6	TUBB2B	6.68056	7.33e-11	-	NA	NA	NA	NA
ILMN_3307868	1	CHI3L1	6.67511	7.58e-11	-	NA	NA	NA	NA
ILMN_1767556	10	C10orf10	6.67475	7.6e-11	-	NA	NA	NA	NA
ILMN_2285817	1	FAM89A	-6.67313	7.68e-11	+	7257	-2.282	-	0.0225
ILMN_1720623	6	SYTL3	-6.6688	7.89e-11	+	NA	NA	NA	NA
ILMN_2352245	4	RASSF6	-6.65854	8.4e-11	+	NA	NA	NA	NA
ILMN_1666733	4	CXCL8	6.65453	8.61e-11	-	NA	NA	NA	NA
ILMN_1797342	9	FNBP1	6.65395	8.64e-11	-	7257	-3.955	-	7.66e-05
ILMN_1681601	3	SUCNR1	-6.65314	8.69e-11	+	NA	NA	NA	NA
ILMN_1712023	14	SLC8A3	6.65092	8.81e-11	-	7257	1.048	+	0.295
ILMN_1682567	19	CCDC106	6.6504	8.83e-11	-	7257	-4.382	-	1.18e-05
ILMN_2139100	3	SHISA5	-6.64999	8.86e-11	+	7257	4.134	+	3.57e-05
ILMN_3243966	X	SCARNA23	6.64935	8.89e-11	-	NA	NA	NA	NA
ILMN_1695853	5	CLK4	-6.63867	9.5e-11	+	7257	-0.804	-	0.422
ILMN_1654773	X	CASK	-6.62914	1.01e-10	+	7257	-5.57	-	2.54e-08
ILMN_1676361	10	ARHGAP22	6.62722	1.02e-10	-	NA	NA	NA	NA
ILMN_1735058	7	CHST12	-6.62087	1.06e-10	+	7257	4.663	+	3.12e-06
ILMN_1682910	6	SLC35B3	-6.61261	1.11e-10	+	7257	-3.641	-	0.000272
ILMN_2135709	8	ERICH5	-6.61242	1.12e-10	+	NA	NA	NA	NA
ILMN_1797283	9	ASTN2	6.61099	1.13e-10	-	NA	NA	NA	NA
ILMN_3245707	12	RIMKLB	-6.60921	1.14e-10	+	NA	NA	NA	NA
ILMN_1723274	2	GPR55	6.60517	1.17e-10	-	7257	-3.094	-	0.00198
ILMN_1808590	4	GUCY1A3	-6.59966	1.21e-10	+	7257	2.14	+	0.0324
ILMN_1807044	9	UBAC1	6.5929	1.26e-10	-	7257	5.693	+	1.25e-08
ILMN_3240150	2	SNORA75	6.59191	1.27e-10	-	NA	NA	NA	NA
ILMN_1796497	6	IPCEF1	-6.58582	1.31e-10	+	6376	-5.131	-	2.88e-07
ILMN_1669210	15	RPL4	6.58448	1.32e-10	-	7257	-8.06	-	7.63e-16
ILMN_1708890	10	RASSF4	6.582	1.34e-10	-	NA	NA	NA	NA
ILMN_1810274	17	HOXB2	-6.57448	1.41e-10	+	7257	-2.467	-	0.0136
ILMN_1810423	6	RPP40	6.57361	1.42e-10	-	7257	-6.388	-	1.68e-10
ILMN_3178050	17	SPECC1	6.56737	1.47e-10	-	NA	NA	NA	NA
ILMN_1669516	6	ZSCAN9	-6.56278	1.51e-10	+	7257	5.515	+	3.48e-08
ILMN_2131177	4	GUCY1A3	-6.56177	1.52e-10	+	NA	NA	NA	NA
ILMN_1779071	11	FEZ1	6.55235	1.61e-10	-	NA	NA	NA	NA
ILMN_2186061	10	PFKFB3	6.55	1.63e-10	-	7257	3.892	+	9.94e-05
ILMN_1814282	15	AEN	6.55091	1.63e-10	-	7257	-0.923	-	0.356
ILMN_1691508	19	PLAUR	6.54871	1.65e-10	-	NA	NA	NA	NA
ILMN_1803686	20	ADA	6.54072	1.73e-10	-	7257	-2.324	-	0.0201
ILMN_1695658	5	KIF20A	-6.53684	1.77e-10	+	NA	NA	NA	NA
ILMN_2326997	19	WDR83	-6.53624	1.78e-10	+	7257	-1.464	-	0.143
ILMN_2406106	10	CACNB2	-6.5356	1.78e-10	+	NA	NA	NA	NA
ILMN_1815346	11	TMEM136	6.53465	1.79e-10	-	NA	NA	NA	NA
ILMN_2111187	4	ELOVL6	-6.5322	1.82e-10	+	7257	5.382	+	7.35e-08
ILMN_1713679	2	MREG	6.52499	1.9e-10	-	7257	-0.263	-	0.792
ILMN_1763398	19	CLEC17A	6.52106	1.95e-10	-	NA	NA	NA	NA
ILMN_2103919	19	LRFN3	6.51845	1.98e-10	-	7257	1.937	+	0.0528
ILMN_1692177	13	TSC22D1	-6.51647	2e-10	+	NA	NA	NA	NA
ILMN_2372413	22	BID	6.51574	2.01e-10	-	NA	NA	NA	NA
ILMN_2415826	17	SPECC1	6.51485	2.02e-10	-	NA	NA	NA	NA
ILMN_1788931	9	DOCK8	-6.51128	2.07e-10	+	7257	-1.412	-	0.158
ILMN_1741356	12	PPHLN1	-6.50814	2.11e-10	+	7257	-3.233	-	0.00123
ILMN_2108938	11	FNBP4	-6.50152	2.19e-10	+	7257	-5.812	-	6.19e-09
ILMN_2147435	5	MAN2A1	-6.49876	2.23e-10	+	7257	0.377	+	0.706
ILMN_1674063	12	OAS2	-6.49876	2.23e-10	+	NA	NA	NA	NA
ILMN_1715404	X	GPR174	-6.498	2.24e-10	+	7257	-1.141	-	0.254
ILMN_2413808	1	CD53	-6.49705	2.25e-10	+	7257	3.51	+	0.000448
ILMN_1727992	11	FEZ1	6.49615	2.27e-10	-	NA	NA	NA	NA
ILMN_2307903	1	VCAM1	6.49551	2.28e-10	-	7257	1.577	+	0.115
ILMN_1733538	10	RGS10	6.48849	2.37e-10	-	7257	-0.672	-	0.502
ILMN_1778358	4	ATP8A1	-6.4866	2.4e-10	+	7257	-0.057	-	0.955
ILMN_2355831	2	FHL2	6.48454	2.43e-10	-	7257	3.236	+	0.00121
ILMN_1809086	3	XRN1	-6.48432	2.43e-10	+	6376	-0.948	-	0.343
ILMN_1725791	10	HACD1	-6.47931	2.51e-10	+	NA	NA	NA	NA
ILMN_1764207	18	RPRD1A	-6.47208	2.62e-10	+	7257	-4.983	-	6.27e-07
ILMN_1655922	22	PPP6R2	-6.46309	2.77e-10	+	7257	-0.882	-	0.378
ILMN_1664499	12	PLEKHG7	-6.46155	2.79e-10	+	7257	1.725	+	0.0846
ILMN_2161746	19	TRIP10	6.45838	2.85e-10	-	NA	NA	NA	NA
ILMN_1657446	1	NTPCR	6.45637	2.88e-10	-	7257	-0.382	-	0.702
ILMN_1672097	3	CD86	6.44857	3.02e-10	-	7257	7.801	+	6.14e-15
ILMN_3243928	4	DDX60L	-6.44534	3.08e-10	+	NA	NA	NA	NA
ILMN_3300313	3	P4HTM	6.44497	3.09e-10	-	7257	1.714	+	0.0865
ILMN_1667449	3	GCSAM	6.4438	3.11e-10	-	7257	-6.264	-	3.75e-10
ILMN_2078697	4	ALPK1	6.44123	3.16e-10	-	7257	3.642	+	0.00027
ILMN_2108735	20	EEF1A2	6.43988	3.18e-10	-	7257	-0.483	-	0.629
ILMN_2046470	14	DAAM1	-6.43985	3.18e-10	+	NA	NA	NA	NA
ILMN_2186137	16	RRAD	6.44004	3.18e-10	-	NA	NA	NA	NA
ILMN_1714165	16	ST3GAL2	6.43955	3.19e-10	-	7257	2.537	+	0.0112
ILMN_1697469	20	SRSF6	6.43707	3.24e-10	-	7257	-8.212	-	2.18e-16
ILMN_1724422	1	SELL	-6.43037	3.37e-10	+	7257	-0.769	-	0.442
ILMN_1752947	17	COPRS	6.42839	3.41e-10	-	7257	-0.582	-	0.561
ILMN_1653163	15	ZSCAN2	6.42763	3.43e-10	-	7257	-0.325	-	0.746
ILMN_1795448	6	OR2B6	-6.42155	3.55e-10	+	NA	NA	NA	NA
ILMN_2134974	11	RAB38	-6.41349	3.73e-10	+	7257	1.413	+	0.158
ILMN_1700762	19	PBX4	6.41197	3.76e-10	-	7257	-3.408	-	0.000655
ILMN_2221046	5	GM2A	6.40689	3.88e-10	-	7257	3.152	+	0.00162
ILMN_2388466	2	TIA1	-6.40564	3.91e-10	+	7257	-2.737	-	0.00619
ILMN_3243061	19	SIGLEC14	6.40389	3.95e-10	-	NA	NA	NA	NA
ILMN_1797001	9	DDX58	-6.39729	4.11e-10	+	7257	2.229	+	0.0258
ILMN_1752299	3	SRPRB	6.39628	4.13e-10	-	7257	-10.121	-	4.45e-24
ILMN_1793522	12	PRKAB1	6.39093	4.27e-10	-	7257	2.025	+	0.0428
ILMN_1785345	12	GPR84	6.38743	4.36e-10	-	7257	2.308	+	0.021
ILMN_2396546	1	IGSF3	6.38713	4.37e-10	-	NA	NA	NA	NA
ILMN_1744614	12	PLEKHG6	6.38543	4.41e-10	-	NA	NA	NA	NA
ILMN_1736021	6	PRPF4B	-6.38409	4.45e-10	+	7257	-2.858	-	0.00427
ILMN_2196347	12	CDKN1B	-6.38027	4.55e-10	+	NA	NA	NA	NA
ILMN_1769412	9	RAPGEF1	6.37971	4.56e-10	-	7257	4.038	+	5.4e-05
ILMN_1817255	12	CCNT1	-6.3686	4.88e-10	+	7257	-0.679	-	0.497
ILMN_1682038	11	TAF1D	-6.35938	5.15e-10	+	7257	-3.304	-	0.000953
ILMN_1714577	10	OGDHL	6.35916	5.16e-10	-	NA	NA	NA	NA
ILMN_1766169	12	BCAT1	6.35802	5.19e-10	-	7257	5.476	+	4.35e-08
ILMN_1676955	19	TYK2	6.35743	5.21e-10	-	6376	3.142	+	0.00168
ILMN_1684628	16	ZFP90	6.35444	5.31e-10	-	7257	-2.514	-	0.0119
ILMN_1668411	2	FHL2	6.3536	5.33e-10	-	NA	NA	NA	NA
ILMN_2367883	8	GEM	6.35136	5.4e-10	-	NA	NA	NA	NA
ILMN_1690122	22	CRKL	-6.34949	5.46e-10	+	7257	-1.974	-	0.0483
ILMN_3238078	11	RPL27A	6.34794	5.51e-10	-	7257	-5.508	-	3.62e-08
ILMN_3309468	1	FOXD2-AS1	-6.34735	5.53e-10	+	NA	NA	NA	NA
ILMN_1761242	2	COMMD1	6.34555	5.59e-10	-	7257	4.203	+	2.63e-05
ILMN_1700811	16	UBFD1	-6.34198	5.71e-10	+	7257	0.51	+	0.61
ILMN_1847308	11	FAM168A	6.33641	5.91e-10	-	NA	NA	NA	NA
ILMN_1683950	17	SNX11	6.3308	6.11e-10	-	7257	4.965	+	6.87e-07
ILMN_1795715	1	DPYD	-6.32059	6.49e-10	+	NA	NA	NA	NA
ILMN_1791702	9	SMARCA2	6.32002	6.51e-10	-	7257	-5.371	-	7.84e-08
ILMN_3224939	12	MUC19	6.3101	6.9e-10	-	NA	NA	NA	NA
ILMN_1711543	14	RIOX1	6.30006	7.32e-10	-	NA	NA	NA	NA
ILMN_1675616	12	C12orf54	6.29882	7.38e-10	-	NA	NA	NA	NA
ILMN_1664466	9	KLHL9	-6.29408	7.59e-10	+	7257	-2.518	-	0.0118
ILMN_3229324	6	SGK1	6.29038	7.76e-10	-	7257	-3.345	-	0.000823
ILMN_1774261	16	DOK4	6.28928	7.81e-10	-	7257	-1.043	-	0.297
ILMN_2211739	3	SLC15A2	-6.28866	7.83e-10	+	7257	-0.007	-	0.995
ILMN_2345015	9	PTGES2	6.27968	8.26e-10	-	7257	-2.046	-	0.0407
ILMN_1748908	8	PROSC	-6.27815	8.34e-10	+	7257	-1.687	-	0.0917
ILMN_1806306	15	SV2B	6.27745	8.37e-10	-	7257	2.964	+	0.00304
ILMN_1753404	12	LRRC23	6.27638	8.42e-10	-	7257	-1.374	-	0.169
ILMN_2342033	1	F11R	6.27026	8.73e-10	-	7257	2.384	+	0.0171
ILMN_1657744	15	MPI	-6.26995	8.75e-10	+	7257	-2.65	-	0.00805
ILMN_1745242	3	PLSCR1	-6.26959	8.77e-10	+	7257	3.822	+	0.000133
ILMN_1803423	X	ARHGEF6	-6.26501	9.01e-10	+	7257	-2.682	-	0.00732
ILMN_1839481	13	SMAD9	-6.25471	9.57e-10	+	NA	NA	NA	NA
ILMN_1651752	X	CXorf21	-6.24315	1.02e-09	+	7257	3.201	+	0.00137
ILMN_1699249	19	ZNF649	6.23809	1.05e-09	-	7257	-5.006	-	5.57e-07
ILMN_1723353	9	FAM122A	-6.2371	1.06e-09	+	7257	-3.428	-	0.000609
ILMN_1745021	1	SLC30A1	6.23206	1.09e-09	-	7257	3.841	+	0.000122
ILMN_1678766	6	DYNLT1	-6.23161	1.1e-09	+	7257	6.751	+	1.47e-11
ILMN_2075847	12	ZC3H10	-6.22026	1.17e-09	+	7257	1.936	+	0.0529
ILMN_3239108	11	RPL27A	6.21885	1.18e-09	-	NA	NA	NA	NA
ILMN_1683927	17	ITGAE	-6.21681	1.19e-09	+	6376	-1.57	-	0.116
ILMN_1673352	11	IFITM2	-6.21514	1.21e-09	+	NA	NA	NA	NA
ILMN_1657624	20	NSFL1C	6.21321	1.22e-09	-	NA	NA	NA	NA
ILMN_1810725	1	FAM129A	6.21236	1.23e-09	-	7257	1.243	+	0.214
ILMN_2323526	10	WAC	-6.20781	1.26e-09	+	7257	-3.833	-	0.000127
ILMN_2147424	18	SERPINB10	6.19655	1.35e-09	-	7257	3.085	+	0.00203
ILMN_2052208	1	GADD45A	6.19474	1.36e-09	-	7257	6.069	+	1.29e-09
ILMN_1702247	15	CCNDBP1	-6.19197	1.38e-09	+	7257	4.308	+	1.65e-05
ILMN_1731745	12	NINJ2	6.1896	1.4e-09	-	7257	0.887	+	0.375
ILMN_1701466	11	PEX16	6.18482	1.44e-09	-	7257	1.936	+	0.0529
ILMN_2403906	4	ARFIP1	-6.18309	1.45e-09	+	7257	2.401	+	0.0164
ILMN_2112256	1	TNFRSF4	6.1799	1.48e-09	-	7257	1.533	+	0.125
ILMN_1789171	16	EEF2K	6.17684	1.51e-09	-	7257	-0.514	-	0.607
ILMN_1812934	20	DIDO1	6.16773	1.59e-09	-	NA	NA	NA	NA
ILMN_2353633	19	ZNF333	6.16685	1.6e-09	-	7257	0.814	+	0.416
ILMN_1796830	22	UBE2L3	6.16611	1.61e-09	-	7257	-2.862	-	0.00421
ILMN_1731518	17	PLD6	6.16412	1.62e-09	-	7257	-3.547	-	0.00039
ILMN_2382990	10	HK1	6.16373	1.63e-09	-	7257	1.349	+	0.178
ILMN_2078599	19	ACP5	6.16033	1.66e-09	-	7257	1.584	+	0.113
ILMN_1708922	9	ABL1	6.15457	1.72e-09	-	7257	-0.615	-	0.539
ILMN_3260345	2	AGFG1	6.14936	1.77e-09	-	7257	5.55	+	2.86e-08
ILMN_1797375	13	KLF12	-6.14841	1.78e-09	+	NA	NA	NA	NA
ILMN_1785175	11	SWAP70	6.14243	1.84e-09	-	7257	-3.846	-	0.00012
ILMN_1702396	22	PACSIN2	6.14278	1.84e-09	-	7257	1.242	+	0.214
ILMN_1705442	16	CMTM3	6.13941	1.87e-09	-	7257	4.773	+	1.81e-06
ILMN_1766269	20	HM13	-6.13709	1.9e-09	+	7257	2.356	+	0.0185
ILMN_2059549	9	SYK	-6.13112	1.97e-09	+	7257	3.581	+	0.000342
ILMN_1726199	17	ZNF594	-6.13075	1.97e-09	+	NA	NA	NA	NA
ILMN_1784540	7	KBTBD2	-6.1244	2.04e-09	+	7257	-2.989	-	0.0028
ILMN_1699585	8	BHLHE22	-6.12044	2.09e-09	+	NA	NA	NA	NA
ILMN_1748625	X	TCEAL4	6.11241	2.19e-09	-	7257	-5.947	-	2.73e-09
ILMN_1662843	1	CD53	-6.11115	2.21e-09	+	NA	NA	NA	NA
ILMN_1710092	20	ZBTB46	6.10982	2.22e-09	-	NA	NA	NA	NA
ILMN_1713918	7	CYTH3	6.10917	2.23e-09	-	NA	NA	NA	NA
ILMN_1736806	8	PAG1	6.10583	2.28e-09	-	7257	-9.42	-	4.51e-21
ILMN_2363250	18	BCL2	6.10468	2.29e-09	-	7257	-5.979	-	2.25e-09
ILMN_1803824	X	ZDHHC9	6.1017	2.33e-09	-	7257	-7.582	-	3.4e-14
ILMN_1665964	11	GAB2	6.09941	2.36e-09	-	7257	5.547	+	2.91e-08
ILMN_1743911	17	SLC25A39	6.09421	2.43e-09	-	7257	0.725	+	0.469
ILMN_1836469	7	NDUFB2	-6.09381	2.44e-09	+	7257	2.514	+	0.0119
ILMN_1792587	18	VPS4B	-6.09376	2.44e-09	+	7257	-1.61	-	0.108
ILMN_2213297	11	C11orf54	-6.09187	2.47e-09	+	7257	-2.332	-	0.0197
ILMN_1751464	19	TNFSF9	6.09084	2.48e-09	-	7257	3.445	+	0.000571
ILMN_1712959	2	DUSP2	6.08263	2.6e-09	-	7257	0.953	+	0.341
ILMN_2346836	17	HSF5	-6.07872	2.66e-09	+	NA	NA	NA	NA
ILMN_1652185	16	IL4R	6.0745	2.73e-09	-	7257	-2.71	-	0.00673
ILMN_1733221	9	SEMA4D	-6.06937	2.81e-09	+	7257	-1.913	-	0.0557
ILMN_1677092	8	GEM	6.06936	2.81e-09	-	NA	NA	NA	NA
ILMN_2145423	15	DET1	-6.0683	2.82e-09	+	7257	-5.042	-	4.6e-07
ILMN_1667374	14	L3HYPDH	-6.06633	2.86e-09	+	7257	-2.208	-	0.0273
ILMN_1774604	2	PNKD	6.06156	2.94e-09	-	7257	6.45	+	1.12e-10
ILMN_2054510	17	BCAS3	-6.05795	3e-09	+	7257	1.302	+	0.193
ILMN_2185984	6	SASH1	-6.05438	3.06e-09	+	7257	1.881	+	0.0599
ILMN_1766851	11	TMEM126B	-6.05199	3.1e-09	+	7257	-2.624	-	0.00869
ILMN_1658290	16	METTL22	6.05125	3.11e-09	-	7257	6.794	+	1.09e-11
ILMN_1757631	16	DBNDD1	-6.0511	3.12e-09	+	7257	-4.626	-	3.72e-06
ILMN_3235928	2	CYTIP	-6.04808	3.17e-09	+	NA	NA	NA	NA
ILMN_2209515	20	NOP56	6.04784	3.18e-09	-	7257	-7.224	-	5.04e-13
ILMN_2058251	10	VIM	-6.04681	3.19e-09	+	7257	7.919	+	2.39e-15
ILMN_1794260	12	KDM2B	6.04586	3.21e-09	-	7257	-3.979	-	6.93e-05
ILMN_1705049	8	TMEM67	6.04485	3.23e-09	-	7257	-3.14	-	0.00169
ILMN_1776076	20	POFUT1	6.04025	3.32e-09	-	7257	-2.021	-	0.0433
ILMN_1668960	X	MID1IP1	-6.03803	3.36e-09	+	NA	NA	NA	NA
ILMN_3238955	17	EIF4A1	6.03438	3.43e-09	-	NA	NA	NA	NA
ILMN_1654262	3	ZMAT3	6.03374	3.44e-09	-	NA	NA	NA	NA
ILMN_1730670	19	FSTL3	6.03319	3.45e-09	-	7257	0.031	+	0.975
ILMN_3296705	12	C1RL-AS1	-6.02874	3.54e-09	+	NA	NA	NA	NA
ILMN_1735474	8	R3HCC1	6.02757	3.57e-09	-	NA	NA	NA	NA
ILMN_1746408	19	MIDN	-6.01705	3.79e-09	+	NA	NA	NA	NA
ILMN_1699091	14	GPATCH2L	6.01119	3.91e-09	-	7257	1.15	+	0.25
ILMN_2406169	20	PKIG	6.01	3.94e-09	-	NA	NA	NA	NA
ILMN_2366714	22	UQCR10	-6.00711	4.01e-09	+	7257	0.891	+	0.373
ILMN_1758529	17	P2RX1	-6.00471	4.06e-09	+	7257	5.368	+	7.96e-08
ILMN_1762003	3	SEC62	-5.99951	4.18e-09	+	7257	-7.223	-	5.09e-13
ILMN_1755235	16	XPO6	5.99826	4.21e-09	-	7257	-1.029	-	0.303
ILMN_2125374	12	CMAS	5.99543	4.28e-09	-	7257	-1.424	-	0.155
ILMN_1672605	7	MTURN	-5.99334	4.33e-09	+	NA	NA	NA	NA
ILMN_1752591	8	LEPROTL1	-5.99239	4.36e-09	+	7257	-12.769	-	2.44e-37
ILMN_1793859	12	ALDH2	-5.99208	4.36e-09	+	7257	5.661	+	1.51e-08
ILMN_1705302	19	FCGRT	-5.98742	4.48e-09	+	7257	4.685	+	2.81e-06
ILMN_1674399	11	ZNF143	-5.98663	4.5e-09	+	6376	-3.118	-	0.00182
ILMN_1738816	13	FOXO1	-5.98373	4.58e-09	+	7257	-12.571	-	3.06e-36
ILMN_1716086	2	WDR33	-5.98228	4.61e-09	+	7257	-4.85	-	1.24e-06
ILMN_1666376	7	TRIM56	-5.98178	4.63e-09	+	7257	2.605	+	0.0092
ILMN_1769191	20	GNAS	-5.98109	4.64e-09	+	7257	-1.531	-	0.126
ILMN_1756501	3	ST6GAL1	-5.97861	4.71e-09	+	7257	-6.767	-	1.32e-11
ILMN_2350114	13	TRIM13	-5.97677	4.76e-09	+	7257	1.005	+	0.315
ILMN_1655191	1	CASZ1	5.97641	4.77e-09	-	7257	6.377	+	1.81e-10
ILMN_1718334	20	ITPA	5.97497	4.81e-09	-	7257	-1.087	-	0.277
ILMN_2183784	11	TTC12	5.97414	4.83e-09	-	NA	NA	NA	NA
ILMN_1773363	16	CIITA	5.97347	4.85e-09	-	7257	0.295	+	0.768
ILMN_2374352	16	DBNDD1	-5.96526	5.08e-09	+	NA	NA	NA	NA
ILMN_1733390	4	LARP1B	5.96389	5.12e-09	-	7257	-6.239	-	4.41e-10
ILMN_1660451	13	STARD13	-5.96126	5.2e-09	+	7257	3.835	+	0.000126
ILMN_3300353	7	ISPD	-5.95875	5.27e-09	+	NA	NA	NA	NA
ILMN_3236049	20	ZFAS1	5.95705	5.32e-09	-	NA	NA	NA	NA
ILMN_1721842	3	RYBP	5.95397	5.42e-09	-	7257	0.114	+	0.91
ILMN_1745034	12	SLC11A2	5.95226	5.47e-09	-	7257	-3.967	-	7.29e-05
ILMN_1712095	X	FOXO4	-5.95074	5.51e-09	+	7257	2.557	+	0.0106
ILMN_1673024	3	RBM15B	-5.94967	5.55e-09	+	7257	0.943	+	0.346
ILMN_1761829	10	HK1	5.94549	5.68e-09	-	NA	NA	NA	NA
ILMN_1790962	19	RINL	5.94223	5.79e-09	-	7257	2.488	+	0.0128
ILMN_1695829	17	TTYH2	5.94045	5.84e-09	-	7257	2.655	+	0.00792
ILMN_3299702	12	MUC19	5.93835	5.91e-09	-	NA	NA	NA	NA
ILMN_1672417	11	PTPRCAP	-5.93529	6.02e-09	+	7257	-2.674	-	0.00749
ILMN_1717056	12	TXNRD1	-5.93471	6.04e-09	+	7257	-0.147	-	0.883
ILMN_1738383	19	EEF2	5.93355	6.08e-09	-	7257	-10.416	-	2.1e-25
ILMN_1803392	17	TAX1BP3	5.93201	6.13e-09	-	7257	4.181	+	2.9e-05
ILMN_1795678	1	POLR3C	5.92735	6.29e-09	-	7257	-1.564	-	0.118
ILMN_1687315	9	RXRA	5.92185	6.49e-09	-	7257	2.31	+	0.0209
ILMN_1703650	5	TNIP1	5.92059	6.54e-09	-	7257	2.038	+	0.0416
ILMN_1659257	1	TNFRSF8	5.91654	6.69e-09	-	7257	5.389	+	7.08e-08
ILMN_1796762	16	CCDC102A	5.91606	6.71e-09	-	7257	-1.261	-	0.207
ILMN_1746578	20	SLC23A2	5.91579	6.72e-09	-	7257	-0.463	-	0.644
ILMN_1709937	19	KCNN4	5.91382	6.79e-09	-	7257	0.052	+	0.959
ILMN_1698252	X	FANCB	-5.9121	6.86e-09	+	7257	-2.001	-	0.0454
ILMN_1659156	10	ANKRD16	5.91151	6.88e-09	-	7257	-3.747	-	0.000179
ILMN_1729487	6	GMPR	-5.90796	7.02e-09	+	7257	2.2	+	0.0278
ILMN_3237376	11	GRAMD1B	5.90639	7.08e-09	-	NA	NA	NA	NA
ILMN_2092850	4	HPSE	-5.90623	7.09e-09	+	7257	2.723	+	0.00646
ILMN_1802708	6	BTN3A1	-5.90276	7.22e-09	+	7257	5.908	+	3.46e-09
ILMN_1792389	18	RNF165	-5.90262	7.23e-09	+	7257	3.777	+	0.000159
ILMN_1782444	2	YIPF4	-5.89963	7.35e-09	+	7257	-0.351	-	0.726
ILMN_1740185	6	TPMT	5.89956	7.36e-09	-	7257	3.993	+	6.53e-05
ILMN_1681641	13	DLEU1	-5.89116	7.71e-09	+	NA	NA	NA	NA
ILMN_3236358	4	NOP14-AS1	5.89008	7.76e-09	-	NA	NA	NA	NA
ILMN_1767523	3	IL17RB	5.88494	7.98e-09	-	NA	NA	NA	NA
ILMN_1751338	1	NUP133	-5.88218	8.11e-09	+	7257	-4.014	-	5.97e-05
ILMN_1716583	1	NME7	-5.87918	8.25e-09	+	7257	-4.616	-	3.91e-06
ILMN_1765417	20	RBBP9	5.87066	8.65e-09	-	NA	NA	NA	NA
ILMN_1747589	1	HIST2H2AB	-5.86985	8.69e-09	+	NA	NA	NA	NA
ILMN_1734346	19	IZUMO4	5.86967	8.7e-09	-	NA	NA	NA	NA
ILMN_1808226	1	RGS16	5.86603	8.87e-09	-	NA	NA	NA	NA
ILMN_1668924	14	BEGAIN	5.86564	8.89e-09	-	7257	1.853	+	0.0639
ILMN_2115005	6	FGD2	-5.86529	8.91e-09	+	7257	2.913	+	0.00359
ILMN_1659766	10	BAG3	5.85919	9.22e-09	-	7257	-6.927	-	4.31e-12
ILMN_1673757	2	CASP8	5.85918	9.22e-09	-	7257	4.489	+	7.16e-06
ILMN_2383349	2	STEAP3	5.85526	9.42e-09	-	7257	3.313	+	0.000924
ILMN_1804051	7	SNX8	5.85427	9.48e-09	-	7257	2.149	+	0.0317
ILMN_3241139	20	NOP56	5.85412	9.48e-09	-	NA	NA	NA	NA
ILMN_1733627	18	NEDD4L	5.85355	9.51e-09	-	7257	-1.858	-	0.0632
ILMN_1793476	11	PRKCDBP	5.84993	9.71e-09	-	7257	5.382	+	7.36e-08
ILMN_1773963	19	GNA15	5.84624	9.91e-09	-	7257	5.148	+	2.63e-07
ILMN_1792168	1	GALE	5.84381	1e-08	-	7257	1.955	+	0.0506
ILMN_2312606	7	IRF5	5.84044	1.02e-08	-	6376	3.553	+	0.000381
ILMN_1651429	22	SELENOM	5.83849	1.03e-08	-	NA	NA	NA	NA
ILMN_3244461	6	CARMIL1	-5.83746	1.04e-08	+	NA	NA	NA	NA
ILMN_2131392	5	WDR70	5.83571	1.05e-08	-	7257	-1.192	-	0.233
ILMN_1788203	8	HEY1	-5.8306	1.08e-08	+	6376	0.395	+	0.693
ILMN_2384496	3	ST6GAL1	-5.82797	1.1e-08	+	NA	NA	NA	NA
ILMN_2232712	5	MYO10	-5.82508	1.11e-08	+	NA	NA	NA	NA
ILMN_1683774	10	IL2RA	5.82124	1.14e-08	-	7257	3.571	+	0.000356
ILMN_1847494	12	SLC16A7	-5.81801	1.16e-08	+	NA	NA	NA	NA
ILMN_3303673	7	UMAD1	-5.81778	1.16e-08	+	NA	NA	NA	NA
ILMN_1671452	2	MRPL44	-5.81626	1.17e-08	+	7257	1.658	+	0.0973
ILMN_1800447	16	PHKB	-5.81224	1.2e-08	+	7257	-0.9	-	0.368
ILMN_2054019	1	ISG15	-5.80961	1.21e-08	+	7257	1.011	+	0.312
ILMN_1784655	17	TLCD1	5.80924	1.22e-08	-	NA	NA	NA	NA
ILMN_1789502	X	GPC4	-5.80527	1.24e-08	+	NA	NA	NA	NA
ILMN_1670975	8	ERICH5	-5.80167	1.27e-08	+	NA	NA	NA	NA
ILMN_1798926	12	SOCS2	5.79952	1.28e-08	-	7257	0.612	+	0.54
ILMN_1696450	19	KLK1	5.79901	1.29e-08	-	7257	0.613	+	0.54
ILMN_2129388	10	CCSER2	5.79734	1.3e-08	-	7257	-3.472	-	0.000517
ILMN_1707945	12	HELB	-5.79509	1.32e-08	+	7257	-6.292	-	3.13e-10
ILMN_1700695	9	SLC44A1	-5.79343	1.33e-08	+	7257	3.691	+	0.000223
ILMN_1798602	11	PCF11	-5.78984	1.35e-08	+	7257	-2.543	-	0.011
ILMN_1723684	1	ACKR1	5.79063	1.35e-08	-	NA	NA	NA	NA
ILMN_1814787	7	ICA1	5.78677	1.38e-08	-	7257	3.001	+	0.00269
ILMN_3248811	13	RPL21	5.78416	1.4e-08	-	NA	NA	NA	NA
ILMN_1781045	11	FXYD2	-5.78269	1.41e-08	+	NA	NA	NA	NA
ILMN_1741985	12	BBS10	-5.77951	1.43e-08	+	7257	-3.22	-	0.00128
ILMN_3246708	7	SNORA5C	5.77189	1.5e-08	-	NA	NA	NA	NA
ILMN_1657708	3	MGLL	5.77012	1.51e-08	-	7257	5.577	+	2.44e-08
ILMN_1656415	1	CDKN2C	-5.77071	1.51e-08	+	7257	0.621	+	0.535
ILMN_1660817	11	DDB2	5.76777	1.53e-08	-	7257	3.995	+	6.48e-05
ILMN_2188333	12	CD69	-5.76809	1.53e-08	+	7257	-0.647	-	0.518
ILMN_3236220	19	LPAR2	5.76638	1.54e-08	-	NA	NA	NA	NA
ILMN_1679133	6	SERPINB1	-5.76562	1.55e-08	+	7257	6.931	+	4.18e-12
ILMN_1714602	3	CD86	5.76334	1.57e-08	-	NA	NA	NA	NA
ILMN_1740265	1	ACOT7	5.7622	1.58e-08	-	7257	4.664	+	3.1e-06
ILMN_1736730	6	CARMIL1	-5.76068	1.59e-08	+	NA	NA	NA	NA
ILMN_1666206	17	GSDMB	-5.7584	1.61e-08	+	7257	-2.082	-	0.0373
ILMN_1843932	5	SAP30L	-5.75543	1.64e-08	+	7257	3.015	+	0.00257
ILMN_1726659	19	THOP1	5.75472	1.64e-08	-	7257	-2.024	-	0.0429
ILMN_1672278	17	CXCL16	5.74931	1.69e-08	-	7257	7.114	+	1.13e-12
ILMN_1741736	16	DDX28	5.74579	1.73e-08	-	7257	-3.668	-	0.000244
ILMN_1707199	14	WDR20	-5.74515	1.73e-08	+	7257	-2.693	-	0.00707
ILMN_1804090	17	SLC25A10	5.74416	1.74e-08	-	7257	2.255	+	0.0241
ILMN_1712673	6	SASH1	-5.74254	1.76e-08	+	NA	NA	NA	NA
ILMN_2049184	3	DNASE1L3	5.74175	1.77e-08	-	7257	-8.102	-	5.39e-16
ILMN_1807455	14	DHRS7	5.74029	1.78e-08	-	7257	3.394	+	0.000688
ILMN_1716272	3	KBTBD8	-5.73896	1.79e-08	+	7257	-1.396	-	0.163
ILMN_1730612	20	SYS1-DBNDD	5.73917	1.79e-08	-	NA	NA	NA	NA
ILMN_1687825	18	CD226	5.73796	1.8e-08	-	7257	0.953	+	0.341
ILMN_1831106	12	SMUG1	5.73714	1.81e-08	-	6376	3.06	+	0.00221
ILMN_1737025	3	PLCL2	5.72979	1.89e-08	-	7257	-2.191	-	0.0285
ILMN_1726698	14	PSME1	-5.72654	1.92e-08	+	7257	5.34	+	9.3e-08
ILMN_3235185	2	SNRNP200	5.72612	1.92e-08	-	7257	-2.193	-	0.0283
ILMN_1741440	6	SLC35A1	-5.72626	1.92e-08	+	7257	0.75	+	0.453
ILMN_1721559	5	FABP6	5.72058	1.98e-08	-	NA	NA	NA	NA
ILMN_1678678	11	TRAPPC4	5.71756	2.02e-08	-	7257	-1.042	-	0.298
ILMN_1737157	19	GRAMD1A	5.7146	2.05e-08	-	7257	-3.842	-	0.000122
ILMN_2319000	19	MATK	5.71232	2.07e-08	-	7257	4.777	+	1.78e-06
ILMN_2204754	20	TMX4	-5.70869	2.12e-08	+	7257	8.482	+	2.2e-17
ILMN_1784753	5	PAIP2	-5.70806	2.12e-08	+	7257	-2.407	-	0.0161
ILMN_1659786	1	TRMT13	-5.70283	2.18e-08	+	7257	-8.255	-	1.51e-16
ILMN_1809566	6	ZSCAN16	-5.70298	2.18e-08	+	7257	3.319	+	0.000904
ILMN_1703314	16	KLHL36	5.70363	2.18e-08	-	7257	-3.125	-	0.00178
ILMN_1686478	6	HIST1H2AG	-5.7031	2.18e-08	+	7257	-2.158	-	0.0309
ILMN_1696591	13	RB1	-5.7008	2.21e-08	+	7257	-0.873	-	0.383
ILMN_1791483	5	PDE4D	-5.70013	2.22e-08	+	7257	-3.519	-	0.000432
ILMN_1655068	17	TOM1L2	5.69924	2.23e-08	-	6376	4.063	+	4.84e-05
ILMN_1729175	11	FBXO3	-5.6955	2.27e-08	+	7257	-5.195	-	2.05e-07
ILMN_1771403	5	PWWP2A	-5.69207	2.32e-08	+	NA	NA	NA	NA
ILMN_1653026	4	PLAC8	-5.6911	2.33e-08	+	7257	-5.914	-	3.34e-09
ILMN_1798204	16	IL21R	5.68839	2.36e-08	-	7257	-1.595	-	0.111
ILMN_2364357	11	RPS6KB2	5.68681	2.38e-08	-	7257	1.316	+	0.188
ILMN_1872404	3	CCDC50	5.68592	2.4e-08	-	7257	-6.742	-	1.56e-11
ILMN_1672717	10	TMEM254	5.68472	2.41e-08	-	7257	-3.563	-	0.000366
ILMN_1783394	22	ATF4	5.67764	2.51e-08	-	7257	2.71	+	0.00674
ILMN_1705928	2	SNRNP200	5.67668	2.52e-08	-	NA	NA	NA	NA
ILMN_3299905	12	RNFT2	5.67089	2.6e-08	-	NA	NA	NA	NA
ILMN_1738736	3	SNX4	5.66758	2.65e-08	-	7257	-2.615	-	0.00892
ILMN_1667330	19	ERVK3-1	-5.66653	2.66e-08	+	NA	NA	NA	NA
ILMN_1703430	19	CCDC94	5.66421	2.7e-08	-	7257	-1.163	-	0.245
ILMN_1762899	5	EGR1	5.66122	2.74e-08	-	7257	-1.375	-	0.169
ILMN_1792885	11	CTSC	-5.65934	2.77e-08	+	7257	6.41	+	1.46e-10
ILMN_1651610	4	SPRY1	-5.654	2.85e-08	+	7257	-13.53	-	1.05e-41
ILMN_1681124	19	C19orf48	5.65419	2.85e-08	-	7257	-3.467	-	0.000526
ILMN_1795639	10	MGMT	5.65289	2.87e-08	-	7257	-0.117	-	0.907
ILMN_1803143	11	SYVN1	-5.65031	2.91e-08	+	7257	-2.92	-	0.0035
ILMN_1714397	13	CRYL1	5.65	2.91e-08	-	7257	0.476	+	0.634
ILMN_1673282	X	LAMP2	-5.6467	2.96e-08	+	7257	2.163	+	0.0305
ILMN_1703228	7	AGFG2	5.64652	2.97e-08	-	7257	1.769	+	0.0769
ILMN_1677376	8	CHD7	-5.64441	3e-08	+	NA	NA	NA	NA
ILMN_1765860	X	DOCK11	-5.64042	3.07e-08	+	7257	-3.748	-	0.000178
ILMN_1898124	7	SNHG15	5.63763	3.11e-08	-	NA	NA	NA	NA
ILMN_1748291	1	SDE2	-5.63575	3.15e-08	+	7257	-3.981	-	6.88e-05
ILMN_1742866	5	F2R	5.62622	3.31e-08	-	7257	12.787	+	1.93e-37
ILMN_1671005	1	IRF2BP2	5.62567	3.32e-08	-	7257	1.981	+	0.0476
ILMN_2377733	2	CASP8	5.62283	3.37e-08	-	NA	NA	NA	NA
ILMN_1791569	3	PLXNA1	5.61953	3.43e-08	-	7257	-2.315	-	0.0206
ILMN_1731048	4	TLR1	5.61346	3.55e-08	-	7257	-0.006	-	0.995
ILMN_1755077	6	HEBP2	5.61134	3.59e-08	-	7257	5.984	+	2.18e-09
ILMN_1680390	6	GCNT2	5.60779	3.66e-08	-	7257	0.955	+	0.34
ILMN_2194627	2	GMCL1	-5.60703	3.67e-08	+	7257	-2.795	-	0.00519
ILMN_1654542	5	FAM172A	5.60207	3.77e-08	-	7257	2.513	+	0.012
ILMN_1703487	1	LMO4	-5.60058	3.8e-08	+	7257	3.851	+	0.000118
ILMN_1652677	1	FAM89A	-5.5979	3.86e-08	+	NA	NA	NA	NA
ILMN_1799575	1	IL19	-5.59295	3.96e-08	+	NA	NA	NA	NA
ILMN_1729180	15	GATM	5.58837	4.06e-08	-	7257	-2.882	-	0.00395
ILMN_2132599	10	ANKRD22	5.5875	4.08e-08	-	7257	9.027	+	1.76e-19
ILMN_1661653	15	DET1	-5.58334	4.17e-08	+	NA	NA	NA	NA
ILMN_2329927	21	ABCG1	-5.58171	4.21e-08	+	NA	NA	NA	NA
ILMN_1707292	17	C17orf67	-5.57897	4.27e-08	+	NA	NA	NA	NA
ILMN_1702177	6	GLO1	5.57602	4.34e-08	-	7257	-0.05	-	0.96
ILMN_2131861	12	SOCS2	5.57248	4.42e-08	-	NA	NA	NA	NA
ILMN_3307791	1	FAM69A	-5.57116	4.45e-08	+	NA	NA	NA	NA
ILMN_2338323	20	CDC25B	-5.56922	4.5e-08	+	7257	-5.634	-	1.77e-08
ILMN_1712634	2	TIA1	-5.56919	4.5e-08	+	NA	NA	NA	NA
ILMN_1685415	7	HBP1	-5.568	4.53e-08	+	7257	3.568	+	0.00036
ILMN_1814526	10	ADD3	-5.56476	4.61e-08	+	7257	-5.496	-	3.89e-08
ILMN_1684349	22	IL2RB	5.56359	4.64e-08	-	7257	3.6	+	0.000319
ILMN_1711408	2	ANXA4	-5.55654	4.82e-08	+	6376	7.764	+	8.21e-15
ILMN_1693367	8	TPD52	-5.55454	4.87e-08	+	NA	NA	NA	NA
ILMN_1792825	3	ARIH2	5.55314	4.9e-08	-	7257	1.058	+	0.29
ILMN_1691572	22	TST	-5.54932	5e-08	+	7257	2.844	+	0.00445
ILMN_1691567	4	GNPDA2	5.54919	5.01e-08	-	7257	-4.587	-	4.5e-06
ILMN_1665877	2	RNF149	-5.54646	5.08e-08	+	7257	5.422	+	5.9e-08
ILMN_1776490	17	C17orf53	5.54411	5.15e-08	-	7257	2.339	+	0.0194
ILMN_1666522	6	ZDHHC14	-5.5416	5.22e-08	+	NA	NA	NA	NA
ILMN_1662973	11	CD82	5.54052	5.25e-08	-	6376	2.083	+	0.0372
ILMN_1793302	21	WDR4	-5.5378	5.32e-08	+	NA	NA	NA	NA
ILMN_1761456	X	ALG13	-5.53663	5.36e-08	+	7257	-5.459	-	4.78e-08
ILMN_3235853	1	S1PR1	-5.53657	5.36e-08	+	7257	-3.348	-	0.000815
ILMN_1677484	9	SNAPC4	5.53337	5.45e-08	-	7257	0.073	+	0.942
ILMN_1784737	19	S1PR4	-5.53248	5.47e-08	+	7257	0.968	+	0.333
ILMN_1736888	5	SAR1B	-5.52833	5.6e-08	+	7257	-0.506	-	0.613
ILMN_1784294	7	CPA4	5.52815	5.6e-08	-	NA	NA	NA	NA
ILMN_1669703	3	TNK2	-5.52616	5.66e-08	+	7257	-0.73	-	0.465
ILMN_1752520	17	SLFN11	-5.52323	5.75e-08	+	7257	8.437	+	3.25e-17
ILMN_1768534	3	BHLHE40	5.52301	5.76e-08	-	7257	9.512	+	1.88e-21
ILMN_2359029	11	AKIP1	5.51902	5.88e-08	-	7257	4.055	+	5.02e-05
ILMN_1753567	6	ZNF451	-5.51788	5.92e-08	+	7257	-4.686	-	2.78e-06
ILMN_1782679	5	AHRR	5.51771	5.92e-08	-	NA	NA	NA	NA
ILMN_1790562	1	EYA3	5.51107	6.13e-08	-	7257	1.44	+	0.15
ILMN_1696028	12	ETNK1	-5.50953	6.19e-08	+	7257	-3.354	-	0.000797
ILMN_1799487	13	N4BP2L1	-5.50456	6.35e-08	+	7257	-2.403	-	0.0163
ILMN_2404917	10	AFAP1L2	5.50213	6.43e-08	-	NA	NA	NA	NA
ILMN_1710571	16	PAPD5	5.50095	6.47e-08	-	7257	-2.872	-	0.00408
ILMN_2060212	16	TBC1D24	-5.50029	6.5e-08	+	7257	-3.414	-	0.000639
ILMN_1771019	17	MTMR4	5.49939	6.53e-08	-	7257	0.377	+	0.707
ILMN_1666594	16	IRF8	5.49914	6.54e-08	-	7257	-9.254	-	2.15e-20
ILMN_1742124	10	CCSER2	5.49749	6.59e-08	-	7257	-3.384	-	0.000715
ILMN_1659914	9	AK8	5.49727	6.6e-08	-	NA	NA	NA	NA
ILMN_1666453	8	STK3	-5.49641	6.63e-08	+	7257	1.173	+	0.241
ILMN_1671116	3	XXYLT1	5.4961	6.64e-08	-	7257	3.465	+	0.00053
ILMN_1677962	14	GPHN	5.49529	6.67e-08	-	7257	-2.269	-	0.0232
ILMN_1779214	11	ATM	-5.48982	6.87e-08	+	NA	NA	NA	NA
ILMN_1655635	14	METTL3	-5.48729	6.96e-08	+	7257	-5.734	-	9.82e-09
ILMN_1851547	X	FAM120C	-5.48664	6.98e-08	+	NA	NA	NA	NA
ILMN_1758673	9	SLC44A1	-5.48548	7.03e-08	+	NA	NA	NA	NA
ILMN_1782098	7	SMO	5.48288	7.12e-08	-	7257	0.436	+	0.663
ILMN_1704529	7	PPIA	5.48188	7.16e-08	-	7257	-0.127	-	0.899
ILMN_2244547	12	ETNK1	5.47574	7.4e-08	-	NA	NA	NA	NA
ILMN_1654639	4	HERC6	-5.47421	7.46e-08	+	7257	-1.851	-	0.0641
ILMN_2388547	13	EPSTI1	-5.4706	7.6e-08	+	6376	3.924	+	8.72e-05
ILMN_2184966	8	ZHX2	-5.46924	7.66e-08	+	NA	NA	NA	NA
ILMN_1753547	17	STAT5A	5.46582	7.79e-08	-	7257	-1.488	-	0.137
ILMN_1704985	2	CYP27A1	-5.46359	7.89e-08	+	7257	3.752	+	0.000176
ILMN_2273572	1	OSCP1	5.45964	8.05e-08	-	NA	NA	NA	NA
ILMN_1667356	2	PPP1R21	-5.45411	8.29e-08	+	7257	-0.144	-	0.886
ILMN_1711748	20	PLTP	5.45167	8.4e-08	-	NA	NA	NA	NA
ILMN_1804454	6	FAM135A	-5.45073	8.44e-08	+	7257	-3.345	-	0.000822
ILMN_1729453	12	TSPAN9	5.44835	8.55e-08	-	7257	8.087	+	6.12e-16
ILMN_1812981	6	PXT1	5.44616	8.64e-08	-	NA	NA	NA	NA
ILMN_1790228	15	FURIN	5.44578	8.66e-08	-	7257	5.518	+	3.43e-08
ILMN_2195821	5	CREBRF	-5.43848	9e-08	+	7257	2.614	+	0.00895
ILMN_1737857	1	GTF2B	-5.43779	9.03e-08	+	7257	-2.115	-	0.0344
ILMN_2080751	18	ADNP2	5.4377	9.04e-08	-	7257	-2.75	-	0.00597
ILMN_2242463	11	CTSC	-5.43724	9.06e-08	+	NA	NA	NA	NA
ILMN_1664170	10	CELF2	5.43708	9.07e-08	-	7257	2.658	+	0.00786
ILMN_1706873	4	RPL34	-5.43693	9.07e-08	+	NA	NA	NA	NA
ILMN_2065022	17	ARHGAP44	5.4364	9.1e-08	-	NA	NA	NA	NA
ILMN_1808584	1	COX20	5.43514	9.16e-08	-	7257	-2.183	-	0.029
ILMN_1751086	11	ATL3	5.43246	9.29e-08	-	7257	6.477	+	9.35e-11
ILMN_3245564	17	ARHGAP44	5.43192	9.32e-08	-	NA	NA	NA	NA
ILMN_1771233	20	CHMP4B	5.42997	9.41e-08	-	7257	-1.586	-	0.113
ILMN_1690546	8	PPP3CC	-5.42925	9.45e-08	+	7257	0.689	+	0.491
ILMN_1696546	7	FZD1	-5.42749	9.54e-08	+	7257	3.048	+	0.00231
ILMN_1745686	8	MFHAS1	-5.42708	9.56e-08	+	7257	2.477	+	0.0133
ILMN_1780898	14	PRKCH	5.42679	9.57e-08	-	7257	-6.515	-	7.26e-11
ILMN_1805330	19	KLHL26	5.42625	9.6e-08	-	7257	-0.334	-	0.738
ILMN_1795118	3	SIDT1	-5.42333	9.74e-08	+	7257	-6.69	-	2.23e-11
ILMN_1726520	14	TDP1	5.42084	9.87e-08	-	7257	-6.697	-	2.13e-11
ILMN_1801767	18	ABHD3	-5.41913	9.96e-08	+	7257	5.034	+	4.8e-07
ILMN_1791593	12	DENND5B	-5.41824	1e-07	+	6376	-4.675	-	2.94e-06
ILMN_1719039	17	UBE2G1	5.41746	1e-07	-	7257	-4.412	-	1.03e-05
ILMN_1674344	18	PARD6G	-5.41813	1e-07	+	NA	NA	NA	NA
ILMN_1813775	4	GAK	5.41496	1.02e-07	-	7257	2.969	+	0.00299
ILMN_1719202	16	ZNF174	5.41408	1.02e-07	-	7257	-2.072	-	0.0382
ILMN_1684278	1	RPS8	5.41454	1.02e-07	-	NA	NA	NA	NA
ILMN_1694084	17	CYTH1	5.41289	1.03e-07	-	7257	1.659	+	0.0971
ILMN_1771599	3	PLOD2	-5.41076	1.04e-07	+	7257	4.074	+	4.62e-05
ILMN_1775211	1	ERO1B	5.41117	1.04e-07	-	NA	NA	NA	NA
ILMN_1747857	17	SMARCE1	5.40851	1.05e-07	-	7257	-2.007	-	0.0447
ILMN_2370208	16	CMTM3	5.40858	1.05e-07	-	NA	NA	NA	NA
ILMN_1798270	11	SMCO4	5.40815	1.06e-07	-	NA	NA	NA	NA
ILMN_1773407	16	C16orf72	-5.40358	1.08e-07	+	7257	-0.084	-	0.933
ILMN_1779547	4	HPSE	-5.40415	1.08e-07	+	NA	NA	NA	NA
ILMN_1703565	19	GLTSCR2	5.40175	1.09e-07	-	7257	-8.626	-	6.38e-18
ILMN_1657547	11	CCDC34	5.40214	1.09e-07	-	7257	-5.249	-	1.53e-07
ILMN_1787526	2	C2orf88	-5.40164	1.09e-07	+	7257	-2.189	-	0.0286
ILMN_1795922	17	ZNF830	-5.40096	1.1e-07	+	NA	NA	NA	NA
ILMN_1713505	18	NPC1	-5.39889	1.11e-07	+	7257	8.274	+	1.29e-16
ILMN_1811702	17	GRN	5.39899	1.11e-07	-	7257	6.625	+	3.48e-11
ILMN_1686623	5	CSF1R	5.3981	1.11e-07	-	7257	5.655	+	1.55e-08
ILMN_1653836	11	KIAA1549L	5.39796	1.11e-07	-	NA	NA	NA	NA
ILMN_1711030	8	SMPD5	5.39818	1.11e-07	-	NA	NA	NA	NA
ILMN_1754234	10	ZMYND11	-5.3967	1.12e-07	+	7257	-4.166	-	3.1e-05
ILMN_2385647	3	ALAS1	5.39418	1.13e-07	-	7257	2.76	+	0.00578
ILMN_1701487	16	TAOK2	-5.38967	1.16e-07	+	7257	2.958	+	0.0031
ILMN_2075643	18	ANKRD29	-5.3855	1.19e-07	+	NA	NA	NA	NA
ILMN_1887403	1	DBT	-5.38127	1.21e-07	+	7257	-6.112	-	9.82e-10
ILMN_1665095	9	NSMF	5.38206	1.21e-07	-	NA	NA	NA	NA
ILMN_1679438	4	PRIMPOL	5.37984	1.22e-07	-	NA	NA	NA	NA
ILMN_2374362	9	ABHD17B	-5.37922	1.23e-07	+	7257	-2.563	-	0.0104
ILMN_3271092	2	PPP1R21	-5.37643	1.24e-07	+	NA	NA	NA	NA
ILMN_3245062	4	SHROOM3	-5.37676	1.24e-07	+	NA	NA	NA	NA
ILMN_1690101	3	FAIM	-5.37484	1.26e-07	+	7257	-2.821	-	0.00478
ILMN_1691444	9	UHRF2	-5.37453	1.26e-07	+	7257	0.942	+	0.346
ILMN_2124064	2	REL	5.37085	1.28e-07	-	7257	1.737	+	0.0824
ILMN_2341254	13	STARD13	-5.3691	1.29e-07	+	NA	NA	NA	NA
ILMN_1731354	3	PARL	5.36858	1.3e-07	-	6376	-0.892	-	0.372
ILMN_1694890	X	TREX2	5.36793	1.3e-07	-	NA	NA	NA	NA
ILMN_1815184	1	ASPM	-5.36697	1.31e-07	+	7257	-3.849	-	0.000119
ILMN_1811648	17	DCAKD	5.36697	1.31e-07	-	7257	-2.566	-	0.0103
ILMN_2043079	3	ILDR1	5.36673	1.31e-07	-	NA	NA	NA	NA
ILMN_1675640	12	OAS1	-5.36578	1.32e-07	+	7257	5.202	+	1.98e-07
ILMN_1734830	1	C1orf167	-5.36168	1.34e-07	+	NA	NA	NA	NA
ILMN_2407308	8	HEY1	-5.36259	1.34e-07	+	NA	NA	NA	NA
ILMN_1739156	6	DOPEY1	-5.36043	1.35e-07	+	7257	-1.534	-	0.125
ILMN_1770085	1	BTG2	-5.35753	1.37e-07	+	7257	-5.97	-	2.37e-09
ILMN_3235517	7	ZNF777	5.35507	1.39e-07	-	NA	NA	NA	NA
ILMN_2408543	19	PLAUR	5.34982	1.43e-07	-	NA	NA	NA	NA
ILMN_1762529	3	SLC12A8	5.34405	1.47e-07	-	7257	1.912	+	0.0559
ILMN_1838313	1	LRRC8B	5.34366	1.48e-07	-	NA	NA	NA	NA
ILMN_1729832	7	EIF4H	5.34133	1.49e-07	-	7257	1.072	+	0.284
ILMN_1796642	1	NCF2	5.33962	1.51e-07	-	7257	4.104	+	4.07e-05
ILMN_1806500	6	CPNE5	-5.33807	1.52e-07	+	7257	-1.969	-	0.049
ILMN_1781636	1	VWA1	-5.33744	1.52e-07	+	7257	1.491	+	0.136
ILMN_1779257	20	CD40	5.33758	1.52e-07	-	NA	NA	NA	NA
ILMN_2341467	3	PARL	5.33807	1.52e-07	-	NA	NA	NA	NA
ILMN_1678934	9	POLR1E	5.33772	1.52e-07	-	NA	NA	NA	NA
ILMN_1709257	21	RIPPLY3	-5.33688	1.53e-07	+	NA	NA	NA	NA
ILMN_2383163	11	DEPDC7	-5.33062	1.58e-07	+	7257	-2.764	-	0.0057
ILMN_1708029	9	TMEM8B	5.32919	1.59e-07	-	6376	-5.92	-	3.22e-09
ILMN_1802380	1	RERE	-5.32653	1.61e-07	+	7257	0.282	+	0.778
ILMN_3248301	19	ZNF583	5.32281	1.64e-07	-	NA	NA	NA	NA
ILMN_1766045	1	SH3GLB1	-5.3219	1.65e-07	+	7257	2.682	+	0.00732
ILMN_1712184	6	HIST1H3C	-5.32108	1.66e-07	+	NA	NA	NA	NA
ILMN_2199676	15	CEP152	-5.31989	1.67e-07	+	NA	NA	NA	NA
ILMN_1808059	20	BCAS4	5.31834	1.68e-07	-	7257	-8.601	-	7.93e-18
ILMN_2229969	1	ERO1B	5.31736	1.69e-07	-	NA	NA	NA	NA
ILMN_1721626	10	ARID5B	-5.31382	1.72e-07	+	NA	NA	NA	NA
ILMN_1786426	19	IGFLR1	5.31276	1.73e-07	-	7257	2.656	+	0.00791
ILMN_2352190	7	CLIP2	5.31122	1.74e-07	-	7257	2.622	+	0.00873
ILMN_1752478	1	DHRS3	5.30757	1.78e-07	-	7257	-3.994	-	6.49e-05
ILMN_2271627	16	ATXN2L	-5.30732	1.78e-07	+	7257	-2.526	-	0.0116
ILMN_1750674	12	SDSL	5.30653	1.79e-07	-	7257	1.9	+	0.0574
ILMN_2372974	20	SIRPA	5.30254	1.82e-07	-	NA	NA	NA	NA
ILMN_1688666	6	HIST1H2BH	-5.30185	1.83e-07	+	NA	NA	NA	NA
ILMN_2076600	X	ITM2A	-5.30137	1.84e-07	+	7257	-6.903	-	5.08e-12
ILMN_1720889	4	MSMO1	-5.29933	1.86e-07	+	7257	1.468	+	0.142
ILMN_1746704	10	TRIM8	5.29762	1.87e-07	-	6376	0.331	+	0.741
ILMN_1767662	2	CERS6-AS1	-5.29741	1.87e-07	+	NA	NA	NA	NA
ILMN_1726842	1	TYW3	5.29717	1.88e-07	-	7257	-4.349	-	1.37e-05
ILMN_1690386	20	PET117	5.29479	1.9e-07	-	NA	NA	NA	NA
ILMN_3235404	11	METTL12	5.29391	1.91e-07	-	NA	NA	NA	NA
ILMN_1663722	9	DNAJB5	5.29148	1.93e-07	-	NA	NA	NA	NA
ILMN_3310391	8	PVT1	5.29201	1.93e-07	-	NA	NA	NA	NA
ILMN_1718770	19	MAMSTR	5.28881	1.96e-07	-	7257	-1.105	-	0.269
ILMN_2066124	18	TUBB6	5.28561	1.99e-07	-	7257	4.998	+	5.79e-07
ILMN_2047430	10	2005-03-01	5.28555	1.99e-07	-	7257	-1.784	-	0.0744
ILMN_1701947	X	GPR34	-5.28139	2.03e-07	+	7257	-1.428	-	0.153
ILMN_1743032	1	CTSS	-5.27759	2.07e-07	+	7257	4.532	+	5.83e-06
ILMN_1682208	10	CACNB2	-5.27501	2.1e-07	+	NA	NA	NA	NA
ILMN_3247939	11	SNORA23	5.27483	2.1e-07	-	NA	NA	NA	NA
ILMN_1686662	15	ANP32A	-5.27151	2.14e-07	+	7257	-0.285	-	0.776
ILMN_1769520	11	UBE2L6	-5.27013	2.15e-07	+	7257	5.145	+	2.68e-07
ILMN_1733519	X	HMGB3	-5.27046	2.15e-07	+	7257	2.769	+	0.00562
ILMN_1862180	11	C11orf95	-5.26754	2.18e-07	+	NA	NA	NA	NA
ILMN_1729212	7	GRM8	-5.26621	2.2e-07	+	NA	NA	NA	NA
ILMN_1653504	1	S1PR1	-5.26591	2.2e-07	+	NA	NA	NA	NA
ILMN_2364272	13	MBNL2	-5.26538	2.21e-07	+	7257	-1.107	-	0.268
ILMN_2342695	7	PDGFA	5.2623	2.24e-07	-	NA	NA	NA	NA
ILMN_1760620	4	TMEM33	-5.26149	2.25e-07	+	7257	0.769	+	0.442
ILMN_2088990	X	CXorf21	-5.26135	2.25e-07	+	NA	NA	NA	NA
ILMN_1702759	20	TMX4	-5.26103	2.26e-07	+	NA	NA	NA	NA
ILMN_1697227	17	USP36	5.25867	2.28e-07	-	7257	-4.663	-	3.12e-06
ILMN_1678939	6	VNN2	-5.2582	2.29e-07	+	7257	4.178	+	2.94e-05
ILMN_2121816	1	GPR137B	5.2567	2.31e-07	-	7257	8.63	+	6.14e-18
ILMN_1720083	15	EHD4	5.25548	2.32e-07	-	7257	7.063	+	1.62e-12
ILMN_1693269	19	GNG8	5.25316	2.35e-07	-	7257	-2.444	-	0.0145
ILMN_2127328	5	PURA	-5.25265	2.36e-07	+	7257	-4.616	-	3.9e-06
ILMN_2408430	22	LARGE1	5.25133	2.37e-07	-	NA	NA	NA	NA
ILMN_3235270	17	NOL11	5.25076	2.38e-07	-	7257	-9.217	-	3.07e-20
ILMN_1766637	X	GLA	-5.24902	2.4e-07	+	7257	6.18	+	6.41e-10
ILMN_1694504	1	RNF220	5.24469	2.45e-07	-	7257	0.523	+	0.601
ILMN_1777745	7	FAM133B	-5.24451	2.46e-07	+	7257	-3.345	-	0.000822
ILMN_1673305	1	RHOC	5.2387	2.53e-07	-	7257	12.894	+	4.89e-38
ILMN_1756877	14	IFT43	5.23907	2.53e-07	-	7257	-2.942	-	0.00326
ILMN_1712430	17	ATP5G1	5.23698	2.55e-07	-	7257	-5.398	-	6.75e-08
ILMN_1778478	1	CCDC28B	5.23651	2.56e-07	-	7257	-0.84	-	0.401
ILMN_1805228	19	LRG1	5.22826	2.67e-07	-	NA	NA	NA	NA
ILMN_1737312	22	SLC25A17	5.22224	2.75e-07	-	7257	-4.898	-	9.69e-07
ILMN_2355462	15	CYFIP1	5.2207	2.77e-07	-	7257	8.5	+	1.9e-17
ILMN_2202915	12	FAR2	-5.22086	2.77e-07	+	6376	6.739	+	1.59e-11
ILMN_1776858	7	DUS4L	5.22022	2.78e-07	-	7257	-2.481	-	0.0131
ILMN_1685978	1	ATPIF1	-5.22026	2.78e-07	+	7257	1.913	+	0.0557
ILMN_1728934	15	PRC1	-5.21895	2.8e-07	+	7257	0.552	+	0.581
ILMN_1690420	1	GFI1	-5.21676	2.83e-07	+	7257	8.668	+	4.41e-18
ILMN_2323385	7	TRIM4	-5.2165	2.83e-07	+	7257	-5.327	-	9.97e-08
ILMN_1716195	6	HIST1H2BG	-5.21599	2.84e-07	+	7257	-1.959	-	0.0502
ILMN_1662618	5	SQSTM1	5.21426	2.86e-07	-	7257	-0.077	-	0.939
ILMN_1688098	13	TBC1D4	5.21134	2.91e-07	-	7257	-11.822	-	3.02e-32
ILMN_3249235	5	GIN1	-5.20916	2.94e-07	+	7257	-3.273	-	0.00106
ILMN_1680134	19	CARM1	5.20724	2.97e-07	-	7257	-0.43	-	0.667
ILMN_1721657	10	RSU1	5.20495	3e-07	-	7257	-3.913	-	9.13e-05
ILMN_1726512	15	ZSCAN2	5.20288	3.03e-07	-	NA	NA	NA	NA
ILMN_1677439	12	GLS2	5.20258	3.04e-07	-	NA	NA	NA	NA
ILMN_1692107	11	KMT5B	-5.20226	3.04e-07	+	NA	NA	NA	NA
ILMN_1696757	3	TTC14	-5.19947	3.09e-07	+	7257	-3.551	-	0.000383
ILMN_1694174	11	TRIM68	5.1937	3.18e-07	-	7257	-3.428	-	0.000608
ILMN_1815445	X	IDS	5.19271	3.2e-07	-	7257	8.051	+	8.19e-16
ILMN_1804884	22	C22orf39	-5.19265	3.2e-07	+	7257	-2.394	-	0.0167
ILMN_1781285	5	DUSP1	5.1916	3.21e-07	-	7257	6.639	+	3.16e-11
ILMN_1734878	19	CD79A	-5.18785	3.27e-07	+	6376	-10.01	-	1.38e-23
ILMN_3238358	4	SCARNA22	5.18669	3.29e-07	-	NA	NA	NA	NA
ILMN_1670172	2	WDR33	-5.18544	3.31e-07	+	NA	NA	NA	NA
ILMN_1785439	17	CD79B	-5.18351	3.35e-07	+	7257	-8.299	-	1.05e-16
ILMN_2236655	20	HM13	-5.1771	3.46e-07	+	NA	NA	NA	NA
ILMN_1667744	18	GNAL	-5.17631	3.47e-07	+	7257	3.24	+	0.0012
ILMN_1682774	13	TEX30	-5.17532	3.49e-07	+	7257	-1.88	-	0.0601
ILMN_1700923	1	ATG4C	-5.17471	3.5e-07	+	7257	-4.462	-	8.11e-06
ILMN_2368530	16	IL32	5.17417	3.51e-07	-	7257	-1.978	-	0.0479
ILMN_3255061	17	SPECC1	5.1736	3.52e-07	-	NA	NA	NA	NA
ILMN_1798659	6	CCDC28A	-5.17068	3.57e-07	+	7257	-0.24	-	0.81
ILMN_1697472	15	TM2D3	5.16955	3.59e-07	-	7257	-4.241	-	2.22e-05
ILMN_1782761	11	ARHGAP20	-5.16682	3.64e-07	+	NA	NA	NA	NA
ILMN_1736441	22	SH3BP1	5.16605	3.66e-07	-	7257	2.146	+	0.0319
ILMN_3239445	14	ZBTB42	-5.16503	3.67e-07	+	NA	NA	NA	NA
ILMN_1684158	16	GPT2	-5.1622	3.73e-07	+	7257	3.519	+	0.000434
ILMN_1670037	11	POLR2L	-5.1595	3.78e-07	+	7257	0.036	+	0.971
ILMN_1669070	13	MIPEP	5.15876	3.79e-07	-	7257	-5.737	-	9.64e-09
ILMN_1671800	16	CRNDE	-5.15849	3.8e-07	+	NA	NA	NA	NA
ILMN_2043809	12	PFKM	5.15411	3.88e-07	-	7257	-0.398	-	0.691
ILMN_1712082	15	GCNT3	5.15293	3.9e-07	-	NA	NA	NA	NA
ILMN_1795762	2	PLEK	5.15182	3.93e-07	-	7257	8.391	+	4.81e-17
ILMN_2225608	6	FAM135A	-5.1514	3.94e-07	+	NA	NA	NA	NA
ILMN_2067852	1	SLC30A1	5.14989	3.97e-07	-	NA	NA	NA	NA
ILMN_1660629	3	NBEAL2	5.14844	3.99e-07	-	7257	7.626	+	2.42e-14
ILMN_1707631	5	MED10	5.14657	4.03e-07	-	7257	-2.51	-	0.0121
ILMN_2310909	17	ATP2A3	-5.14623	4.04e-07	+	7257	1.273	+	0.203
ILMN_1779648	1	HIST3H2A	-5.1457	4.05e-07	+	6376	3.665	+	0.000248
ILMN_1656837	3	RBP1	5.14457	4.07e-07	-	NA	NA	NA	NA
ILMN_1751264	7	CCDC126	5.14201	4.12e-07	-	7257	0.792	+	0.429
ILMN_1805916	22	THOC5	5.14102	4.15e-07	-	7257	-0.349	-	0.727
ILMN_1752988	11	AKIP1	5.14043	4.16e-07	-	NA	NA	NA	NA
ILMN_2188862	19	GDF15	5.1393	4.18e-07	-	NA	NA	NA	NA
ILMN_1711702	12	CLEC2D	-5.13307	4.31e-07	+	NA	NA	NA	NA
ILMN_1663618	17	STAT3	5.13273	4.32e-07	-	7257	5.544	+	2.95e-08
ILMN_1700232	6	FBXO30	-5.12945	4.39e-07	+	7257	1.348	+	0.178
ILMN_1787461	1	RUNX3	5.12924	4.4e-07	-	7257	5.525	+	3.29e-08
ILMN_2091375	2	KRCC1	-5.12875	4.41e-07	+	7257	-0.948	-	0.343
ILMN_1666545	9	GCNT1	5.12831	4.42e-07	-	7257	5.891	+	3.84e-09
ILMN_1913937	1	MIR181A1HG	-5.12727	4.44e-07	+	NA	NA	NA	NA
ILMN_3181215	2	AGFG1	5.12704	4.45e-07	-	NA	NA	NA	NA
ILMN_2371590	22	DDX17	-5.12532	4.48e-07	+	7257	1.943	+	0.0521
ILMN_1710017	17	CD79B	-5.12303	4.54e-07	+	NA	NA	NA	NA
ILMN_1749960	1	FAM78B	5.12196	4.56e-07	-	NA	NA	NA	NA
ILMN_1752923	21	IFNAR1	-5.11936	4.62e-07	+	7257	-3.991	-	6.57e-05
ILMN_1778010	16	IL32	5.11909	4.63e-07	-	NA	NA	NA	NA
ILMN_1728517	14	FNTB	5.11741	4.67e-07	-	7257	2.735	+	0.00624
ILMN_1720303	6	OSTM1	-5.11677	4.68e-07	+	7257	0.201	+	0.841
ILMN_1768488	16	TERF2	-5.11574	4.7e-07	+	7257	-3.449	-	0.000563
ILMN_1708782	5	MFAP3	-5.11511	4.72e-07	+	7257	-1.508	-	0.132
ILMN_1805853	19	PHLDB3	5.11286	4.77e-07	-	7257	-1.928	-	0.0539
ILMN_2389429	4	DCUN1D4	-5.11222	4.79e-07	+	7257	-4.606	-	4.12e-06
ILMN_1804895	7	LSMEM1	-5.11084	4.82e-07	+	7257	1.787	+	0.074
ILMN_2326273	1	CHI3L2	-5.11061	4.83e-07	+	6376	-6.651	-	2.91e-11
ILMN_2232177	14	ACTN1	-5.10906	4.86e-07	+	7257	-2.889	-	0.00386
ILMN_1798346	18	KIAA1468	-5.10785	4.89e-07	+	7257	-1.188	-	0.235
ILMN_1913678	12	IRAK3	-5.10746	4.9e-07	+	7257	9.088	+	1.01e-19
ILMN_1717163	6	F13A1	-5.10574	4.95e-07	+	7257	8.169	+	3.11e-16
ILMN_1764788	1	TNFRSF1B	5.10513	4.96e-07	-	7257	5.399	+	6.7e-08
ILMN_1709114	22	TAB1	-5.10382	4.99e-07	+	6376	-2.351	-	0.0187
ILMN_1786105	10	PCBD1	-5.10342	5e-07	+	7257	5.951	+	2.66e-09
ILMN_1668484	1	LRRC47	5.10374	5e-07	-	7257	-0.7	-	0.484
ILMN_2253300	14	TM9SF1	-5.10288	5.02e-07	+	7257	2.727	+	0.0064
ILMN_1800958	2	TMEM237	5.09824	5.13e-07	-	7257	-0.201	-	0.841
ILMN_1874613	18	ATP5A1	5.09727	5.16e-07	-	7257	-4.359	-	1.31e-05
ILMN_1804676	1	VAMP4	-5.09708	5.16e-07	+	7257	-0.51	-	0.61
ILMN_1745806	17	PEMT	5.09593	5.19e-07	-	7257	-1.006	-	0.315
ILMN_2356068	7	CDK13	-5.09417	5.24e-07	+	7257	-1.559	-	0.119
ILMN_1776788	5	CREBRF	-5.0937	5.25e-07	+	NA	NA	NA	NA
ILMN_1685952	16	ACSM3	-5.09246	5.28e-07	+	NA	NA	NA	NA
ILMN_1795507	17	ABCA6	-5.09034	5.34e-07	+	7257	6.198	+	5.73e-10
ILMN_1692199	2	RNF103	-5.09026	5.34e-07	+	7257	-0.682	-	0.495
ILMN_2352097	16	ADGRG1	5.0886	5.39e-07	-	NA	NA	NA	NA
ILMN_1787378	10	ADD3	-5.08636	5.45e-07	+	NA	NA	NA	NA
ILMN_1801421	X	EMD	5.08515	5.48e-07	-	7257	-4.166	-	3.11e-05
ILMN_1812968	20	SOX18	-5.08501	5.48e-07	+	NA	NA	NA	NA
ILMN_1711894	6	MYB	5.08306	5.54e-07	-	7257	-3.469	-	0.000522
ILMN_1718069	17	MIS12	-5.079	5.65e-07	+	7257	-6.327	-	2.51e-10
ILMN_1818617	3	RYK	-5.07901	5.65e-07	+	7257	-3.909	-	9.25e-05
ILMN_3239060	7	KRBA1	5.07809	5.68e-07	-	7257	1.414	+	0.157
ILMN_2384241	3	TGFBR2	-5.07766	5.69e-07	+	7257	-5.394	-	6.9e-08
ILMN_1714082	12	CMAS	5.07529	5.75e-07	-	NA	NA	NA	NA
ILMN_1798448	X	IDS	5.07464	5.77e-07	-	NA	NA	NA	NA
ILMN_1783621	2	CMPK2	-5.07103	5.88e-07	+	7257	2.003	+	0.0451
ILMN_1712798	5	ZNF608	5.07079	5.88e-07	-	NA	NA	NA	NA
ILMN_1733654	X	CXorf40B	5.07015	5.9e-07	-	NA	NA	NA	NA
ILMN_1736655	1	LCE1B	5.06598	6.03e-07	-	7257	-0.554	-	0.58
ILMN_1670532	2	GMCL1	-5.06603	6.03e-07	+	NA	NA	NA	NA
ILMN_1669905	5	DCP2	-5.06396	6.09e-07	+	7257	-2.229	-	0.0258
ILMN_1812226	19	ICAM1	5.06207	6.14e-07	-	7257	1.014	+	0.311
ILMN_2392274	11	CD82	5.05866	6.25e-07	-	NA	NA	NA	NA
ILMN_1801464	17	ANKFY1	-5.05766	6.28e-07	+	7257	2.888	+	0.00388
ILMN_2052871	12	TMEM116	-5.05772	6.28e-07	+	6376	1.208	+	0.227
ILMN_1792682	15	MCTP2	-5.05671	6.31e-07	+	6376	4.407	+	1.05e-05
ILMN_1672884	15	MTFMT	5.05486	6.37e-07	-	7257	-0.228	-	0.82
ILMN_1752837	3	ARL8B	5.05461	6.38e-07	-	7257	1.01	+	0.312
ILMN_1678671	3	KLHL24	-5.05352	6.41e-07	+	7257	-1.094	-	0.274
ILMN_1753472	3	SUMF1	5.05204	6.46e-07	-	7257	2.296	+	0.0217
ILMN_1788841	14	TCL1A	-5.05112	6.49e-07	+	6376	-6.797	-	1.07e-11
ILMN_1758864	6	VNN2	-5.04961	6.54e-07	+	NA	NA	NA	NA
ILMN_1761464	5	CD74	5.04549	6.67e-07	-	7257	3.786	+	0.000153
ILMN_1753275	9	DENND1A	5.04498	6.69e-07	-	7257	6.731	+	1.68e-11
ILMN_1739032	8	TMEM70	5.044	6.72e-07	-	7257	-1.353	-	0.176
ILMN_1652521	8	MTMR9	5.03916	6.88e-07	-	7257	-1.655	-	0.0978
ILMN_1747223	4	FRYL	-5.03517	7.02e-07	+	7257	-1.897	-	0.0578
ILMN_1666976	19	PLD3	5.03497	7.03e-07	-	7257	2.737	+	0.00619
ILMN_1729142	17	CENPV	5.03418	7.05e-07	-	7257	-3.793	-	0.000149
ILMN_2410986	17	STAT3	5.03299	7.09e-07	-	NA	NA	NA	NA
ILMN_1755405	11	PGAP2	5.0319	7.13e-07	-	7257	-2.054	-	0.04
ILMN_1689294	11	HSPA8	-5.0286	7.25e-07	+	7257	-5.237	-	1.64e-07
ILMN_1711227	6	GMDS	5.02788	7.27e-07	-	7257	0.964	+	0.335
ILMN_2358560	6	TIAM2	5.02681	7.31e-07	-	7257	-0.965	-	0.335
ILMN_1671427	10	FBXW4	5.02574	7.35e-07	-	7257	-1.31	-	0.19
ILMN_1873838	2	IGKV5-2	-5.02401	7.41e-07	+	NA	NA	NA	NA
ILMN_1779486	2	FAM126B	-5.02081	7.53e-07	+	7257	5.959	+	2.54e-09
ILMN_1770373	3	TMEM39A	-5.02029	7.55e-07	+	7257	0.617	+	0.537
ILMN_1780397	1	TRAF3IP3	-5.01931	7.59e-07	+	7257	-9.501	-	2.09e-21
ILMN_1754279	4	FBXW7	-5.01798	7.64e-07	+	7257	-1.954	-	0.0507
ILMN_1810229	14	ARID4A	-5.01408	7.79e-07	+	7257	-1.831	-	0.0671
ILMN_3248091	6	C6orf223	5.01012	7.94e-07	-	NA	NA	NA	NA
ILMN_2173919	15	MYO9A	5.00931	7.97e-07	-	7257	1.267	+	0.205
ILMN_1755737	22	TRABD	5.0079	8.03e-07	-	7257	3.208	+	0.00134
ILMN_1742827	7	EXOC4	5.00597	8.1e-07	-	7257	2.492	+	0.0127
ILMN_1729161	9	NOTCH1	5.00565	8.11e-07	-	7257	-1.694	-	0.0902
ILMN_2325506	20	BCAS4	5.00498	8.14e-07	-	NA	NA	NA	NA
ILMN_1812384	5	NR3C1	5.00428	8.17e-07	-	7257	3.169	+	0.00153
ILMN_2041788	X	PLS3	-5.00339	8.21e-07	+	NA	NA	NA	NA
ILMN_1822333	2	CD28	-5.00249	8.24e-07	+	7257	-14.157	-	1.69e-45
ILMN_1654289	X	ELK1	5.00207	8.26e-07	-	7257	-0.962	-	0.336
ILMN_1681543	2	RHBDD1	-5.0002	8.33e-07	+	7257	-4.134	-	3.57e-05
ILMN_2371458	2	ACKR3	4.99854	8.4e-07	-	NA	NA	NA	NA
ILMN_2148668	13	RCBTB2	-4.99615	8.5e-07	+	7257	4.403	+	1.07e-05
ILMN_1672589	15	SEMA4B	-4.99511	8.55e-07	+	7257	1.748	+	0.0805
ILMN_1658182	18	MEX3C	-4.9927	8.65e-07	+	7257	1.532	+	0.126
ILMN_1680393	1	RPS8	4.99252	8.65e-07	-	NA	NA	NA	NA
ILMN_1739428	10	IFIT2	-4.99064	8.73e-07	+	7257	1.952	+	0.0509
ILMN_2375973	14	ALKBH1	-4.99057	8.74e-07	+	7257	-2.491	-	0.0127
ILMN_1823112	2	RBM45	-4.98934	8.79e-07	+	7257	-2.113	-	0.0346
ILMN_1698243	1	TMEM79	4.98912	8.8e-07	-	7257	0.133	+	0.894
ILMN_2394296	5	SAR1B	-4.98875	8.82e-07	+	NA	NA	NA	NA
ILMN_2209766	2	RHBDD1	-4.98801	8.85e-07	+	NA	NA	NA	NA
ILMN_1706505	9	COL5A1	-4.98523	8.97e-07	+	NA	NA	NA	NA
ILMN_1742611	1	C1orf52	-4.98495	8.98e-07	+	7257	-5.276	-	1.32e-07
ILMN_1746175	1	TNFSF4	4.98433	9.01e-07	-	7257	2.59	+	0.00961
ILMN_2273103	1	ELK4	-4.9832	9.06e-07	+	7257	-4.039	-	5.38e-05
ILMN_1718831	1	TMEM57	4.98279	9.08e-07	-	NA	NA	NA	NA
ILMN_1806908	16	PRKCB	4.97672	9.35e-07	-	7257	2.911	+	0.0036
ILMN_1693882	4	TAPT1	-4.97389	9.48e-07	+	7257	-4.209	-	2.57e-05
ILMN_2367165	3	ABTB1	-4.97353	9.5e-07	+	7257	3.07	+	0.00214
ILMN_2413259	14	SOCS4	-4.97333	9.51e-07	+	7257	-0.368	-	0.713
ILMN_3237850	5	C5orf51	-4.97202	9.57e-07	+	7257	-7.19	-	6.46e-13
ILMN_3238672	3	EIF4A2	4.97199	9.57e-07	-	NA	NA	NA	NA
ILMN_2397750	1	IVNS1ABP	-4.97075	9.63e-07	+	7257	4.075	+	4.6e-05
ILMN_2285112	2	FBXO11	-4.97048	9.64e-07	+	7257	-2.656	-	0.0079
ILMN_1677158	9	IGFBPL1	4.96575	9.86e-07	-	NA	NA	NA	NA
ILMN_1702691	6	TNFAIP3	4.96549	9.88e-07	-	7257	3.185	+	0.00145
ILMN_1688103	1	CTNNBIP1	4.96369	9.96e-07	-	7257	2.55	+	0.0108
ILMN_1762275	20	CSE1L	-4.96285	1e-06	+	7257	-8.391	-	4.84e-17
ILMN_2069593	12	SCAF11	-4.96037	1.01e-06	+	7257	-1.379	-	0.168
ILMN_1810053	12	SLC16A7	-4.95995	1.01e-06	+	NA	NA	NA	NA
ILMN_1710906	5	RNF145	-4.9563	1.03e-06	+	7257	-2.493	-	0.0127
ILMN_1758543	14	CNIH1	-4.95541	1.04e-06	+	NA	NA	NA	NA
ILMN_1697268	18	EMILIN2	4.95045	1.06e-06	-	7257	3.031	+	0.00244
ILMN_1766275	1	PIK3CD	4.95103	1.06e-06	-	7257	-2.771	-	0.00558
ILMN_1784207	1	PITHD1	4.94882	1.07e-06	-	7257	1.806	+	0.071
ILMN_1679881	8	WRN	4.9471	1.08e-06	-	7257	-8.204	-	2.32e-16
ILMN_1651699	12	EPS8	-4.94676	1.08e-06	+	7257	0.938	+	0.348
ILMN_2339202	14	KTN1	-4.94473	1.09e-06	+	7257	-2.834	-	0.0046
ILMN_1772700	2	TMEM18	4.94355	1.1e-06	-	7257	-4.015	-	5.95e-05
ILMN_3251526	3	USP13	4.94233	1.11e-06	-	7257	-5.333	-	9.65e-08
ILMN_1668027	3	NDUFB4	-4.94203	1.11e-06	+	NA	NA	NA	NA
ILMN_1772743	1	PIGK	-4.94009	1.12e-06	+	7257	-3.299	-	0.000971
ILMN_1660063	2	POLE4	-4.93727	1.13e-06	+	7257	5.79	+	7.03e-09
ILMN_1732516	12	KNTC1	-4.93782	1.13e-06	+	7257	-3.076	-	0.0021
ILMN_1685122	1	COL9A2	4.93621	1.14e-06	-	7257	5.254	+	1.49e-07
ILMN_2086077	19	JUNB	4.93566	1.14e-06	-	7257	1.694	+	0.0903
ILMN_1720373	16	SLC7A5	4.93568	1.14e-06	-	7257	1.482	+	0.138
ILMN_1801914	4	SH3BP2	4.93389	1.15e-06	-	7257	6.605	+	3.98e-11
ILMN_1798458	1	KAZN	4.93471	1.15e-06	-	7257	2.09	+	0.0367
ILMN_1673899	17	FAM57A	4.92813	1.18e-06	-	7257	-4.611	-	4e-06
ILMN_1713496	2	ST3GAL5	4.92837	1.18e-06	-	7257	2.333	+	0.0197
ILMN_1749338	18	ANKRD29	-4.92293	1.21e-06	+	NA	NA	NA	NA
ILMN_1658483	2	IL1A	4.92366	1.21e-06	-	NA	NA	NA	NA
ILMN_1770245	2	EPB41L5	-4.9219	1.22e-06	+	7257	-0.737	-	0.461
ILMN_1752741	5	TRIM23	-4.91946	1.23e-06	+	7257	-4.033	-	5.5e-05
ILMN_1678922	10	HERC4	-4.92053	1.23e-06	+	7257	-3.87	-	0.000109
ILMN_1721138	5	GRPEL2	4.91843	1.24e-06	-	7257	-10.395	-	2.62e-25
ILMN_2057573	7	ESYT2	4.91815	1.24e-06	-	7257	-4.621	-	3.82e-06
ILMN_1772644	11	EML3	4.91743	1.25e-06	-	7257	-2.488	-	0.0128
ILMN_1669094	1	ZNF672	4.91557	1.26e-06	-	7257	0.505	+	0.614
ILMN_3306440	12	NEMP1	-4.91553	1.26e-06	+	NA	NA	NA	NA
ILMN_2170814	3	LAMP3	4.91305	1.27e-06	-	7257	-2.466	-	0.0137
ILMN_1682165	10	CNNM2	-4.9143	1.27e-06	+	7257	0.475	+	0.635
ILMN_1666633	4	TAPT1-AS1	-4.91216	1.28e-06	+	7257	-1.547	-	0.122
ILMN_2366212	17	CD79B	-4.9116	1.28e-06	+	NA	NA	NA	NA
ILMN_1697812	7	MNX1	-4.91249	1.28e-06	+	NA	NA	NA	NA
ILMN_2401618	17	MLX	-4.91009	1.29e-06	+	7257	2.876	+	0.00403
ILMN_3229770	5	SKP1	4.91058	1.29e-06	-	7257	-1.206	-	0.228
ILMN_1651535	6	TMEM217	-4.90896	1.3e-06	+	NA	NA	NA	NA
ILMN_1788213	10	FRAT2	-4.90758	1.31e-06	+	7257	-1.984	-	0.0473
ILMN_1738099	2	CAMKMT	4.90649	1.31e-06	-	7257	-1.068	-	0.285
ILMN_1803988	1	MCL1	-4.90637	1.32e-06	+	7257	3.695	+	0.00022
ILMN_1701455	1	FBXO6	-4.90339	1.33e-06	+	7257	8.975	+	2.83e-19
ILMN_1699931	19	HCST	-4.90241	1.34e-06	+	7257	1.296	+	0.195
ILMN_2383964	14	C14orf79	4.89586	1.38e-06	-	NA	NA	NA	NA
ILMN_1667707	4	SPCS3	-4.8956	1.39e-06	+	7257	-0.688	-	0.491
ILMN_2163723	12	KRT7	4.8944	1.39e-06	-	NA	NA	NA	NA
ILMN_2355168	12	MGST1	-4.89316	1.4e-06	+	7257	4.162	+	3.16e-05
ILMN_1905548	X	MBNL3	-4.89015	1.42e-06	+	7257	-0.268	-	0.789
ILMN_1900110	2	IRS1	-4.89121	1.42e-06	+	NA	NA	NA	NA
ILMN_1781173	7	HDAC9	-4.88884	1.43e-06	+	7257	2.765	+	0.00569
ILMN_1806951	11	CSTF3	-4.88832	1.44e-06	+	6376	-6.665	-	2.64e-11
ILMN_1706344	3	ABHD6	4.88687	1.45e-06	-	6376	0.915	+	0.36
ILMN_1809467	2	VAMP5	-4.88518	1.46e-06	+	7257	12.649	+	1.13e-36
ILMN_1651347	2	SERTAD2	4.88409	1.46e-06	-	7257	-7.705	-	1.31e-14
ILMN_2089875	1	TNFSF4	4.8814	1.48e-06	-	NA	NA	NA	NA
ILMN_1708841	5	GOLPH3	-4.88006	1.49e-06	+	7257	2.172	+	0.0298
ILMN_1799299	1	PRPF38B	-4.87499	1.53e-06	+	7257	-2.286	-	0.0222
ILMN_1735930	19	KLF2	-4.87379	1.54e-06	+	6376	-1.572	-	0.116
ILMN_2381197	8	RNF19A	-4.87105	1.56e-06	+	7257	2.973	+	0.00295
ILMN_1792837	2	CIAO1	-4.87101	1.56e-06	+	7257	-2.791	-	0.00525
ILMN_1776516	15	ITPKA	4.87056	1.56e-06	-	7257	-1.613	-	0.107
ILMN_1694268	2	HES6	-4.86822	1.58e-06	+	7257	3.927	+	8.6e-05
ILMN_3230337	7	PAXIP1-AS2	-4.86746	1.59e-06	+	NA	NA	NA	NA
ILMN_1671568	1	ECHDC2	4.86562	1.6e-06	-	7257	-6.166	-	6.99e-10
ILMN_1699100	1	SOAT1	-4.86483	1.61e-06	+	7257	1.359	+	0.174
ILMN_1790909	2	NFE2L2	-4.86338	1.62e-06	+	7257	-1.9	-	0.0574
ILMN_1752008	10	OTUD1	-4.86364	1.62e-06	+	NA	NA	NA	NA
ILMN_1709237	8	EPHX2	4.8609	1.64e-06	-	7257	-12.692	-	6.52e-37
ILMN_3236367	1	IFFO2	4.86022	1.64e-06	-	NA	NA	NA	NA
ILMN_2067032	2	TRAF3IP1	4.85968	1.65e-06	-	7257	-1.571	-	0.116
ILMN_3237507	12	ATXN7L3B	-4.85893	1.65e-06	+	NA	NA	NA	NA
ILMN_1683065	2	COA5	-4.85716	1.67e-06	+	7257	-4.074	-	4.62e-05
ILMN_1742382	1	RIMS3	-4.85669	1.67e-06	+	7257	-0.609	-	0.542
ILMN_2406410	7	RHBDD2	4.85604	1.68e-06	-	7257	2.825	+	0.00473
ILMN_1781952	12	MGST1	-4.85491	1.68e-06	+	NA	NA	NA	NA
ILMN_1745655	11	PEX16	4.85583	1.68e-06	-	NA	NA	NA	NA
ILMN_1712046	20	CPXM1	-4.85374	1.69e-06	+	NA	NA	NA	NA
ILMN_1651316	12	CD69	-4.85276	1.7e-06	+	NA	NA	NA	NA
ILMN_1788053	2	SLC25A12	4.85021	1.72e-06	-	7257	-1.6	-	0.11
ILMN_1655296	6	UTRN	-4.84532	1.76e-06	+	7257	0.255	+	0.799
ILMN_1673138	X	ZBTB33	-4.84304	1.78e-06	+	7257	-3.066	-	0.00217
ILMN_1804419	12	LRMP	-4.84153	1.8e-06	+	7257	-0.546	-	0.585
ILMN_2077886	1	C1orf109	-4.83899	1.82e-06	+	7257	-5.212	-	1.87e-07
ILMN_1813091	12	ARL1	4.83781	1.83e-06	-	7257	-4.291	-	1.78e-05
ILMN_1704305	16	NIP7	4.83763	1.83e-06	-	7257	-2.186	-	0.0289
ILMN_3237256	4	BEND4	-4.83777	1.83e-06	+	7257	1.362	+	0.173
ILMN_1698406	2	ORMDL1	-4.8337	1.86e-06	+	7257	-3.13	-	0.00175
ILMN_3237679	9	PTAR1	-4.83018	1.9e-06	+	NA	NA	NA	NA
ILMN_1782439	1	CNN3	-4.82859	1.91e-06	+	7257	-11.546	-	7.78e-31
ILMN_1663042	20	SDC4	4.8287	1.91e-06	-	NA	NA	NA	NA
ILMN_2387952	5	FAM134B	-4.82746	1.92e-06	+	7257	-15.167	-	5.88e-52
ILMN_1811957	9	CAMSAP1	4.8267	1.93e-06	-	7257	-0.512	-	0.609
ILMN_1716563	16	PRKCB	4.82611	1.93e-06	-	NA	NA	NA	NA
ILMN_1764827	4	MRFAP1L1	-4.8258	1.94e-06	+	6376	-3.964	-	7.38e-05
ILMN_2048700	8	ATAD2	-4.82548	1.94e-06	+	7257	-2.249	-	0.0245
ILMN_1749253	17	TUBD1	-4.82466	1.95e-06	+	7257	-3.391	-	0.000697
ILMN_2339691	11	SYVN1	-4.8242	1.95e-06	+	NA	NA	NA	NA
ILMN_1764596	22	MPST	-4.8219	1.97e-06	+	7257	2.121	+	0.0339
ILMN_1713832	11	RPS3	4.81738	2.02e-06	-	NA	NA	NA	NA
ILMN_2327795	1	RERE	-4.81565	2.03e-06	+	NA	NA	NA	NA
ILMN_2138765	9	PLIN2	4.8148	2.04e-06	-	7257	6.135	+	8.53e-10
ILMN_1735075	1	PGBD2	-4.8152	2.04e-06	+	7257	-1.257	-	0.209
ILMN_1759008	16	ZNF689	4.81465	2.04e-06	-	7257	0.151	+	0.88
ILMN_1772369	X	PDHA1	4.81416	2.05e-06	-	7257	-2.361	-	0.0182
ILMN_1667948	4	SPATA18	4.81283	2.06e-06	-	NA	NA	NA	NA
ILMN_1791097	1	RSBN1	-4.81185	2.07e-06	+	7257	-5.103	-	3.34e-07
ILMN_2388254	3	GCSAM	4.81212	2.07e-06	-	NA	NA	NA	NA
ILMN_1715613	16	TAOK2	4.8114	2.07e-06	-	NA	NA	NA	NA
ILMN_2092041	2	CYTIP	-4.80927	2.09e-06	+	NA	NA	NA	NA
ILMN_1778625	11	CD44	4.80843	2.1e-06	-	7257	1.711	+	0.0871
ILMN_1756937	5	ST8SIA4	-4.80764	2.11e-06	+	7257	0.978	+	0.328
ILMN_2057220	8	RIDA	-4.80611	2.13e-06	+	NA	NA	NA	NA
ILMN_1657955	12	PRPF40B	4.80442	2.14e-06	-	NA	NA	NA	NA
ILMN_3237946	2	PXDN	-4.80247	2.16e-06	+	NA	NA	NA	NA
ILMN_1691736	9	ST6GALNAC6	4.80191	2.17e-06	-	7257	5.049	+	4.44e-07
ILMN_2344182	13	TMTC4	-4.80183	2.17e-06	+	7257	1.228	+	0.219

## Sheet: Supplementary Table 6 gf
Supplementary Table 5. Transcriptome-wide association results for general cognitive function.
Probe	Beta	SE	P	N	Symbol	Chromosome
ILMN_1701457	-0.039248	0.00941617	3.43505e-05	767	FAHD1	16
ILMN_1705985	0.0373979	0.00902113	3.78274e-05	767	PIGA	X
ILMN_1732831	0.0379052	0.0100451	0.000173887	767	CHST7	X
ILMN_3193798	-0.0114858	0.00305214	0.000181065	767
ILMN_3283592	0.0261764	0.00698015	0.000190587	767
ILMN_1733042	-0.0483779	0.0132213	0.000271143	767	BCAS1	20
ILMN_2375830	0.0128433	0.00356125	0.000331378	767	DIXDC1	11
ILMN_1798543	-0.0493752	0.0137028	0.000335286	767	STK17B	2
ILMN_2403852	-0.0476927	0.0132422	0.000337493	767	CYTH1	17
ILMN_1696330	0.0299935	0.00838272	0.000368826	767	GUF1	4
ILMN_1680029	0.0148742	0.00416508	0.000378441	767	PDP2	16
ILMN_1693804	-0.0195471	0.00550768	0.000411094	767
ILMN_1658677	-0.0278669	0.00790665	0.000450464	767	DTX3	12
ILMN_1673898	0.0229731	0.00652041	0.00045253	767
ILMN_1709101	-0.0414696	0.0117927	0.000463908	767	AKAP13	15
ILMN_1790518	-0.0619377	0.0176474	0.000475789	767	JADE3	X
ILMN_1764522	0.0271996	0.00778207	0.000502074	767	LMBR1	7
ILMN_1788315	-0.027059	0.00779204	0.00054539	767	SIN3B	19
ILMN_1785768	-0.0206913	0.00596381	0.000551734	767	PDE4A	19
ILMN_1753190	0.0238274	0.00687254	0.000556696	767	ERCC6L2	9
ILMN_2189007	-0.0174266	0.00505206	0.000593741	767
ILMN_1753547	-0.0434147	0.0126388	0.000625591	767	STAT5A	17
ILMN_2136147	-0.0404658	0.0118225	0.000654007	767	BCAS1	20
ILMN_3241758	0.0195721	0.00578584	0.000755488	767
ILMN_3238428	-0.0139222	0.00412563	0.000777938	767
ILMN_2205050	-0.0274208	0.00818229	0.000845459	767
ILMN_1695851	-0.0320687	0.00957109	0.000847456	767	PARVG	22
ILMN_1677906	-0.0650561	0.0194349	0.000857159	767
ILMN_1675542	0.0386056	0.0115433	0.000866266	767
ILMN_1761069	-0.0326321	0.0098344	0.000950557	767	UVRAG	11
ILMN_1681008	0.0234321	0.00709328	0.00100116	767	CGRRF1	14
ILMN_2162328	0.0324837	0.00983339	0.00100122	767	PTS	11
ILMN_1812473	0.0123777	0.00376156	0.00104736	767	MLLT3	9
ILMN_2132161	0.0253544	0.00772702	0.00108201	767	KIF18A	11
ILMN_1756920	0.0526202	0.0161158	0.0011446	767	ADAM15	1
ILMN_1671158	0.0285336	0.00874003	0.00114634	767	MRPL13	8
ILMN_1695418	0.0147036	0.00450924	0.00116214	767	IQGAP3	1
ILMN_1709440	0.0132051	0.0040852	0.00128204	767	CPM	12
ILMN_2331087	-0.0191435	0.00593195	0.0013054	767
ILMN_1777487	-0.0211177	0.00655276	0.00132559	767	ZNF839	14
ILMN_1712023	0.0472011	0.0146696	0.00134908	767	SLC8A3	14
ILMN_3233179	0.0248266	0.00772304	0.00136305	767
ILMN_1810930	-0.0108997	0.00339613	0.00138752	767	C6orf223	6
ILMN_1691567	0.0263727	0.00823509	0.00142096	767	GNPDA2	4
ILMN_2249920	-0.0350159	0.0109362	0.00142414	767	FYN	6
ILMN_1674486	-0.0156061	0.00488805	0.00146931	767	KIAA2026	9
ILMN_1696699	0.0121999	0.00382609	0.00148989	767	FAM184A	6
ILMN_1759987	0.00912899	0.00286602	0.00150711	767
ILMN_1854361	0.0094856	0.00298053	0.00152119	767
ILMN_2300695	0.0458497	0.0144597	0.00158275	767	IKZF3	17
ILMN_1772163	-0.0207188	0.00656876	0.00167501	767	PRKY	Y
ILMN_1683927	0.0316997	0.0100602	0.00169287	767	ITGAE	17
ILMN_2397795	-0.0419236	0.0133443	0.00174693	767	SLAIN1	13
ILMN_2256359	0.0335739	0.0107347	0.00183161	767	ZNF823	19
ILMN_2094360	-0.0343721	0.0110108	0.00186843	767	NR2F2	15
ILMN_2399174	-0.0301931	0.00970829	0.00194261	767	TRAK1	3
ILMN_1782098	-0.0175579	0.00565905	0.00199129	767	SMO	7
ILMN_1679460	-0.0288116	0.0092904	0.00200056	767	PPFIBP1	12
ILMN_3236156	0.0293466	0.00946671	0.00200892	767	OSTC	4
ILMN_1722409	-0.0195042	0.00631311	0.00208037	767	HSP90AB2P	4
ILMN_2148796	0.0301997	0.00977954	0.00209026	767	MND1	4
ILMN_3220888	-0.0335296	0.0108635	0.00210137	767
ILMN_2374778	0.0298331	0.00969929	0.00217685	767	DUT	15
ILMN_2041368	0.0204724	0.00665806	0.00218395	767
ILMN_1736190	0.0214567	0.00698016	0.00219022	767
ILMN_2175659	0.012301	0.00400666	0.00221801	767	NUDT8	11
ILMN_1730464	0.0174018	0.0056787	0.0022605	767	DNAL1	14
ILMN_1766613	0.0335082	0.0109608	0.00231563	767	ZNF121	19
ILMN_1662184	0.0249141	0.00816875	0.00237083	767	C5orf34	5
ILMN_1688625	-0.0423035	0.0138743	0.00237766	767	AIM1	6
ILMN_1679614	-0.0200802	0.00658783	0.00238532	767	SGSM3	22
ILMN_1655377	0.0189052	0.00620287	0.00238744	767	MRPS22	3
ILMN_2367020	0.0238214	0.00783593	0.00244925	767	SEC61G	7
ILMN_1697544	-0.0164454	0.0054158	0.00247716	767	SLC25A29	14
ILMN_3275590	0.0233779	0.00771259	0.00252161	767	LSM3P3	2
ILMN_1901616	0.00835122	0.00275847	0.00255185	767	GPRIN3	4
ILMN_2090949	0.0173864	0.00574795	0.00257436	767
ILMN_1802631	0.0293963	0.00974526	0.00264523	767	AGA	4
ILMN_2043816	-0.0270003	0.00895173	0.00264749	767	ARPC5L	9
ILMN_1667110	0.00992918	0.00329249	0.00265179	767
ILMN_3302177	-0.0181627	0.00602281	0.00265233	767	RPL14P1	12
ILMN_1679800	0.0266037	0.00882579	0.00266386	767	BRIX1	5
ILMN_2400947	-0.0293987	0.0097733	0.00271861	767	CELF2	10
ILMN_1655780	0.0124612	0.00414715	0.00274789	767	METTL10	10
ILMN_1776858	0.0216214	0.00719881	0.00275948	767	DUS4L	7
ILMN_1665243	0.0228074	0.00760229	0.00279	767	FKBP14	7
ILMN_1728724	-0.0165871	0.00552893	0.00279011	767	IL17RA	22
ILMN_3302937	-0.0156337	0.00522565	0.00286653	767	TTC17	11
ILMN_1673933	-0.0389161	0.0130092	0.00286931	767
ILMN_1673543	0.0249856	0.00835881	0.00289061	767	PGM2	4
ILMN_1695420	-0.0261132	0.00873804	0.00289703	767	CLTA	9
ILMN_1751086	0.0226352	0.00757474	0.00289891	767	ATL3	11
ILMN_1765061	-0.0176907	0.00592084	0.00290251	767	OXER1	2
ILMN_1732873	-0.0176854	0.00592784	0.00294418	767
ILMN_1656145	0.0216557	0.00727422	0.00300557	767	GOT1	10
ILMN_2119123	0.0248283	0.00835795	0.00306851	767		X
ILMN_3205162	-0.0311062	0.0104856	0.00310876	767
ILMN_1779370	-0.0105894	0.00357276	0.00313514	767	ARHGEF9	X
ILMN_1654032	-0.0122771	0.0041568	0.00324168	767	ZER1	9
ILMN_1768773	-0.0292395	0.00990598	0.00326048	767	RAB4B-EGLN	19
ILMN_2087656	0.0278094	0.00943247	0.00329656	767	SLCO2B1	11
ILMN_1726164	0.00901757	0.00305905	0.00330108	767	NEDD9	6
ILMN_2150000	0.0254006	0.00863445	0.00336556	767	EMC7	15
ILMN_2198376	0.0236957	0.00805835	0.00337915	767	PSMA4	15
ILMN_2120022	0.0217528	0.00740008	0.00338961	767	ARL5B	10
ILMN_1746175	-0.0453756	0.015441	0.00339929	767	TNFSF4	1
ILMN_1811648	0.0379228	0.0129205	0.00343803	767	DCAKD	17
ILMN_1757287	0.0343481	0.0117028	0.00343861	767
ILMN_2315979	-0.0404149	0.0137783	0.00345851	767	LBH	2
ILMN_1658607	0.031608	0.0107857	0.00348826	767
ILMN_1753502	0.0102656	0.00350314	0.00348962	767	IGSF11	3
ILMN_1786834	-0.0253183	0.00864592	0.00351264	767
ILMN_1706498	0.0334564	0.011429	0.00352413	767	DSE	6
ILMN_1746831	0.0126609	0.00432626	0.003533	767	ZNF114	19
ILMN_1803279	0.0368438	0.0126003	0.00356106	767	TMED5	1
ILMN_1792671	0.024977	0.00855307	0.00360427	767	C12orf29	12
ILMN_1685122	-0.0349714	0.0119884	0.00364018	767	COL9A2	1
ILMN_1760954	0.0225332	0.007726	0.00364669	767	DENR	12
ILMN_2055634	0.0250989	0.008621	0.00370696	767
ILMN_1752150	0.0144455	0.00496415	0.00372349	767
ILMN_3279712	-0.0269759	0.00927442	0.00373916	767
ILMN_1780268	0.0106721	0.00367223	0.00376845	767	C1orf56	1
ILMN_1711862	0.0238456	0.00820799	0.00378038	767	RNF7	3
ILMN_1801043	-0.0162536	0.00560669	0.00385499	767	GSN	9
ILMN_1784238	0.0314887	0.0108632	0.00385878	767
ILMN_1800638	-0.0321465	0.0111011	0.00389376	767	CELF2	10
ILMN_2188204	0.0282994	0.00977318	0.00389587	767
ILMN_1684771	0.0265145	0.00916824	0.00394065	767	PGRMC1	X
ILMN_1691333	0.0118289	0.004098	0.00400917	767	ZNF57	19
ILMN_1652928	-0.0220775	0.00764881	0.00401056	767
ILMN_1736888	0.0322204	0.0111762	0.00405434	767	SAR1B	5
ILMN_1684755	0.0103306	0.00358476	0.00406887	767	KAZALD1	10
ILMN_2346769	-0.0185582	0.00645523	0.00415772	767
ILMN_1665660	-0.00923865	0.0032147	0.00417127	767	AKIP1	11
ILMN_1789618	0.0165896	0.0057742	0.00418203	767
ILMN_1766024	0.0296811	0.0103341	0.00419381	767	PDCD10	3
ILMN_1689329	0.0375903	0.0131065	0.00424771	767	SCD	10
ILMN_1749612	0.0235763	0.00822437	0.00426663	767
ILMN_1747184	0.0223593	0.00781919	0.00436227	767	PUS7L	12
ILMN_1653618	0.0264699	0.009263	0.00438881	767	ZZZ3	1
ILMN_1750401	-0.0422379	0.0147934	0.00442175	767	C17orf62	17
ILMN_1815083	-0.0163433	0.00573346	0.00448676	767	NELFA	4
ILMN_1698953	0.00885043	0.00310514	0.00449024	767	BTN1A1	6
ILMN_1797318	0.0239874	0.00841763	0.00449851	767	HSPA14	10
ILMN_2413278	-0.0316667	0.0111155	0.0045096	767
ILMN_1689378	0.0271411	0.00952709	0.00451014	767	NOCT	4
ILMN_1781468	-0.0390985	0.0137312	0.00452998	767
ILMN_1801378	0.023873	0.00839404	0.00457776	767	COQ3	6
ILMN_2378100	-0.0216694	0.00763727	0.00467404	767	FBXL5	4
ILMN_1800935	0.0248667	0.00877655	0.00473265	767	ARV1	1
ILMN_2047354	0.0260545	0.00919593	0.00473327	767	LINC00467	1
ILMN_1722945	0.017916	0.0063266	0.00475405	767	C6orf52	6
ILMN_1683969	-0.0498336	0.0175992	0.00475797	767
ILMN_1767142	0.0240628	0.00850265	0.00478085	767	ZNF280D	15
ILMN_2119937	0.0214523	0.00758126	0.00478651	767
ILMN_2380801	-0.0423964	0.0149896	0.00480522	767	FYN	6
ILMN_1779711	0.0339353	0.0120018	0.0048179	767	DTL	1
ILMN_2210581	-0.0209511	0.00741051	0.00482262	767
ILMN_2123119	0.0198832	0.00703513	0.00483659	767	MFSD8	4
ILMN_1825640	0.00923346	0.00326767	0.0048452	767	LINC00441	13
ILMN_3239130	-0.0307855	0.0108977	0.00485621	767
ILMN_1794364	-0.013056	0.0046239	0.00487681	767	CTSW	11
ILMN_1746517	0.0399108	0.0141595	0.00495146	767
ILMN_1716014	-0.0402122	0.014275	0.00497756	767
ILMN_1900263	-0.029157	0.0103531	0.00498843	767	RNF144A	2
ILMN_1894279	0.00869075	0.00308854	0.00502517	767
ILMN_1724145	-0.0297016	0.0105557	0.00502627	767	CBX4	17
ILMN_3236825	0.0424287	0.0150819	0.00503536	767	RAPGEF5	7
ILMN_1707257	0.00992753	0.00352999	0.00504884	767
ILMN_3200018	0.00957025	0.00340396	0.0050619	767
ILMN_1722223	-0.0247034	0.00878659	0.0050621	767
ILMN_2349610	0.0252924	0.00899958	0.00507907	767
ILMN_1910645	0.0112671	0.00401286	0.00512044	767		22
ILMN_2390859	-0.0433712	0.0154587	0.00515415	767	NFKB2	10
ILMN_1725145	-0.0131762	0.0046989	0.00517837	767	POLA1	X
ILMN_3216336	-0.0420262	0.0149935	0.00519646	767	TPT1P4	6
ILMN_1715458	0.00811057	0.00289915	0.00528305	767	PCDH10	4
ILMN_1770732	0.0200536	0.00717305	0.00531361	767	COPS3	17
ILMN_3294222	-0.0569784	0.020382	0.00531614	767
ILMN_2189859	0.0243185	0.00871235	0.0053858	767	TMEM192	4
ILMN_1681754	0.0279377	0.0100195	0.00543451	767	GGH	8
ILMN_2367165	-0.0131767	0.00473185	0.00549524	767	ABTB1	3
ILMN_1847159	0.00969626	0.00348345	0.00551475	767
ILMN_3235632	0.016055	0.00576873	0.00552189	767
ILMN_1772743	0.0244298	0.00878266	0.00554728	767	PIGK	1
ILMN_3307648	0.0224727	0.00808854	0.00560252	767
ILMN_3267670	0.0220646	0.00795806	0.0057011	767
ILMN_2053921	-0.0521932	0.0188425	0.00574713	767	CAPZB	1
ILMN_2328224	-0.018223	0.006584	0.00578551	767	MADD	11
ILMN_2314080	-0.0107095	0.00387137	0.00581092	767
ILMN_1677133	0.020603	0.00745202	0.00583871	767
ILMN_2167252	0.00793003	0.00287291	0.00591851	767	FAM151A	1
ILMN_1717173	0.030108	0.0109143	0.00594891	767	ECT2	3
ILMN_1775192	0.0255959	0.00927886	0.00595014	767	BCLAF1	6
ILMN_1791576	0.0288685	0.010473	0.00598705	767	CHSY1	15
ILMN_1669927	-0.0211528	0.00767484	0.00599345	767	ICOS	2
ILMN_1693645	0.0106107	0.0038514	0.00601327	767
ILMN_1763887	-0.0228137	0.00829545	0.00610272	767	SFI1	22
ILMN_3178967	0.0148587	0.00540428	0.00611605	767	LRRC3	21
ILMN_2333367	-0.0479878	0.0174758	0.0061804	767
ILMN_3217285	-0.0420728	0.0153247	0.00619047	767
ILMN_3192001	-0.0142644	0.00519841	0.00621718	767
ILMN_2279339	0.0295034	0.0107603	0.00625695	767	WTAP	6
ILMN_1889633	0.0101152	0.00369194	0.00629581	767		20
ILMN_1679301	-0.0118695	0.00434338	0.00643055	767	ZFAT	8
ILMN_1676288	-0.0127169	0.00465563	0.00645525	767
ILMN_1740855	0.00887242	0.00325076	0.0064973	767
ILMN_1911968	0.00990687	0.0036317	0.00652574	767
ILMN_2398388	-0.025695	0.00942602	0.00656332	767	APH1A	1
ILMN_1768293	0.0248601	0.00912227	0.00657829	767	NUP155	5
ILMN_1713143	0.0221376	0.00812339	0.00657918	767	MRPL3	3
ILMN_1717101	-0.00952769	0.0035003	0.00664262	767	MINK1	17
ILMN_1723007	0.0231027	0.00848885	0.00665122	767	ZCCHC9	5
ILMN_2080611	0.024611	0.00904347	0.00665367	767	PDSS1	10
ILMN_2154566	0.0141309	0.00519875	0.00671901	767
ILMN_1741960	0.00937332	0.00344946	0.00673544	767	DGKG	3
ILMN_3288966	0.00905396	0.00333294	0.0067519	767	LINC01451	9
ILMN_1670096	-0.0308872	0.0114041	0.00691678	767	NRBP1	2
ILMN_1675501	0.0172976	0.00638797	0.00692888	767	SENP5	3
ILMN_2077130	0.0165213	0.006105	0.00696313	767
ILMN_1892895	0.00879421	0.00325014	0.00697145	767
ILMN_1803376	0.0205149	0.00758321	0.00698161	767	AEBP2	12
ILMN_1822180	0.0132537	0.00490097	0.00700262	767	RP1	8
ILMN_3240838	-0.0229172	0.00847904	0.00703382	767
ILMN_1728710	0.021711	0.00803993	0.00708447	767	ZNF816	19
ILMN_1722738	-0.0172578	0.00639734	0.00714237	767	ROGDI	16
ILMN_2086077	-0.0342378	0.0126998	0.00717907	767	JUNB	19
ILMN_2182531	0.0204554	0.00759192	0.00721264	767	TIMM21	18
ILMN_1681092	0.0133927	0.00497572	0.00727173	767
ILMN_1777437	-0.0107744	0.00400675	0.00732708	767	LEXM	1
ILMN_1674285	0.0314744	0.0117075	0.00734138	767	NQO2	6
ILMN_1761921	-0.0270439	0.0100599	0.00734422	767	IL12RB2	1
ILMN_1735347	0.025515	0.00950072	0.00740298	767	MCEE	2
ILMN_1664644	-0.0215472	0.00802475	0.00741375	767	ATG16L2	11
ILMN_3287568	-0.0135425	0.00504618	0.00744411	767	FAM89A	1
ILMN_1684034	-0.0188767	0.00704132	0.00750768	767	STAT5B	17
ILMN_1772156	-0.013741	0.00512638	0.00751639	767	ERP44	9
ILMN_1662848	0.0195922	0.00731173	0.00753614	767	TXNDC15	5
ILMN_1769895	0.0116884	0.00436654	0.00759782	767
ILMN_1803060	-0.0181161	0.00676889	0.00760736	767	MAML1	5
ILMN_1674344	0.0290176	0.0108442	0.00761918	767	PARD6G	18
ILMN_2045729	0.0234474	0.00876347	0.00762542	767
ILMN_1693009	0.0344948	0.0129094	0.00770489	767	FGL2	7
ILMN_1807088	0.0204103	0.00763857	0.00770626	767	TTC33	5
ILMN_1694084	-0.0271341	0.0101661	0.00777286	767	CYTH1	17
ILMN_2186482	0.0297193	0.0111375	0.0077888	767	TMED7	5
ILMN_2393544	-0.0223103	0.00836145	0.00779251	767	PRMT2	21
ILMN_1739001	-0.0335371	0.0125717	0.00780548	767	TACSTD2	1
ILMN_1738251	0.00906012	0.00339683	0.00781565	767
ILMN_1778456	-0.00975923	0.00366017	0.0078363	767		5
ILMN_3226392	0.0251641	0.00944603	0.00789051	767
ILMN_1782611	-0.0262497	0.00986068	0.00793547	767	TPT1P6	6
ILMN_1659075	-0.0426661	0.0160407	0.00798703	767
ILMN_2139943	0.0199512	0.00750084	0.00798707	767
ILMN_1815107	0.0240717	0.00905055	0.00799082	767
ILMN_3290380	-0.0307527	0.011572	0.00804222	767
ILMN_1727184	0.0244492	0.00920125	0.00805057	767
ILMN_1811551	0.0206145	0.00776623	0.00811663	767	DERA	12
ILMN_1712950	-0.024027	0.0090574	0.00815554	767
ILMN_1671621	0.0229678	0.00865843	0.00815785	767	PCMT1	6
ILMN_1669064	0.0220499	0.00831759	0.0081977	767	ZNF823	19
ILMN_1713985	-0.0258656	0.00976755	0.00826717	767	SHARPIN	8
ILMN_1682857	0.0263082	0.00993492	0.00826861	767	NDUFAF2	5
ILMN_2403851	0.00881418	0.00332896	0.00827649	767
ILMN_1710482	-0.0140721	0.00531488	0.00827782	767	APLP2	11
ILMN_1725105	0.0268175	0.0101373	0.0083326	767
ILMN_1815184	0.0301794	0.0114202	0.0084008	767	ASPM	1
ILMN_1705247	0.0240727	0.00911207	0.00842021	767	ACSL5	10
ILMN_1889229	0.0107002	0.00405311	0.00846582	767
ILMN_3311190	-0.0148799	0.00564012	0.00850962	767	LINC00173	12
ILMN_1659352	0.00746895	0.00283262	0.0085462	767	KCNK13	14
ILMN_3249543	0.0101601	0.0038559	0.00859155	767	AP1B1	22
ILMN_1869761	0.00758098	0.00287962	0.00864985	767
ILMN_1655316	0.0263307	0.0100035	0.00866181	767
ILMN_3199755	-0.0348472	0.0132399	0.00866632	767	ACTBP12	1
ILMN_2322458	-0.0107235	0.00407637	0.00869984	767	OPA1	3
ILMN_2397199	-0.0167329	0.00636819	0.00877838	767	NDEL1	17
ILMN_1796245	0.0314089	0.0119582	0.00880405	767	DNASE2	19
ILMN_1749077	0.0101562	0.00386952	0.0088528	767	RIC3	11
ILMN_1687592	-0.0349521	0.0133331	0.00893604	767	WWC3	X
ILMN_2058512	0.023206	0.00885326	0.00894301	767	PSMA2	7
ILMN_1754137	0.00772462	0.00294704	0.008944	767		1
ILMN_2210837	0.0232183	0.00886305	0.00898237	767
ILMN_1669692	0.0325905	0.0124485	0.00902554	767	IKZF3	17
ILMN_2082244	-0.0255748	0.00977971	0.00910257	767	FOXK1	7
ILMN_1678235	-0.0330055	0.0126565	0.00929685	767
ILMN_1757026	0.0260683	0.0100016	0.00933434	767	MANEA	6
ILMN_1708147	0.0195031	0.00748314	0.00933792	767
ILMN_1708248	-0.0243164	0.00933391	0.00936792	767
ILMN_3222974	-0.0400945	0.0153968	0.00939713	767	PRKCB	16
ILMN_1685567	0.0237494	0.00912094	0.00940406	767	TGDS	13
ILMN_1743662	0.0126599	0.00486213	0.00940536	767	KBTBD3	11
ILMN_1711466	0.00888495	0.00341239	0.00940694	767
ILMN_2200503	0.0210529	0.00808822	0.00942915	767
ILMN_2405009	-0.0165756	0.00637607	0.00951834	767	NBL1	1
ILMN_1742824	-0.0249866	0.00961157	0.00951886	767	SPATA13	13
ILMN_1832006	0.00905283	0.00348825	0.00964035	767	PDE1C	7
ILMN_2355738	0.0198764	0.00766568	0.00970531	767	INCENP	11
ILMN_1710264	-0.00974225	0.00375943	0.00974706	767
ILMN_3251560	0.0269411	0.0103968	0.00975074	767
ILMN_1666004	0.0195507	0.00754493	0.00975224	767	WASL	7
ILMN_2341952	0.0235718	0.00910352	0.00980652	767
ILMN_1799601	0.0105573	0.00407763	0.00981296	767	UHRF1BP1L	12
ILMN_1776250	-0.00939917	0.0036317	0.00984073	767
ILMN_1739397	0.0234532	0.00906316	0.00985048	767
ILMN_1659885	-0.00962498	0.00372015	0.00986439	767	ACSS3	12
ILMN_3251472	0.0204783	0.00791872	0.00989835	767
ILMN_1807579	0.00713903	0.00276464	0.0100069	767
ILMN_3284420	-0.00875867	0.00339662	0.0101115	767
ILMN_1729691	0.0171067	0.00663713	0.0101469	767	SLC16A6	17
ILMN_1774373	0.00891583	0.00346257	0.01022	767	NIPAL2	8
ILMN_1766165	-0.0134721	0.00523402	0.0102484	767	SNCA	4
ILMN_1731619	0.0204275	0.00793857	0.0102706	767	DAD1	14
ILMN_1809818	-0.0323567	0.0125813	0.0103116	767	PRCC	1
ILMN_2403730	-0.0195798	0.00761347	0.0103138	767
ILMN_1772888	-0.027121	0.0105485	0.0103329	767
ILMN_1688346	0.0234249	0.00911183	0.0103405	767	ZNF800	7
ILMN_1793671	-0.0203606	0.00791989	0.0103407	767	TFDP2	3
ILMN_1793549	0.0173157	0.00673864	0.0103765	767	PTPN4	2
ILMN_1766154	0.0234776	0.00913793	0.0103873	767
ILMN_3201715	0.0155295	0.00604888	0.0104443	767	WNK1	12
ILMN_1718830	0.014177	0.00552705	0.0105138	767	ICE2	15
ILMN_1663616	-0.0220845	0.00861065	0.0105204	767
ILMN_1707901	0.0176391	0.0068777	0.0105236	767	DHRS7B	17
ILMN_1916609	0.00825207	0.00321982	0.0105774	767
ILMN_1701933	-0.025517	0.00996281	0.010628	767		4
ILMN_1666372	0.0171823	0.00671306	0.0106794	767
ILMN_1656630	-0.00944013	0.00369017	0.0107206	767
ILMN_1796639	0.00693502	0.00271292	0.0107784	767	UBQLN3	11
ILMN_1882590	-0.0276429	0.0108211	0.0108329	767	NACC2	9
ILMN_2153029	0.00805869	0.00315468	0.0108332	767
ILMN_1750181	-0.0541203	0.0211885	0.010842	767	TESC	12
ILMN_3239990	0.00822902	0.00322313	0.0108766	767
ILMN_1715616	0.0215543	0.00844754	0.0109251	767	LRR1	14
ILMN_1673673	0.0325015	0.0127387	0.0109299	767	PBK	8
ILMN_1723962	0.0239623	0.00939219	0.0109329	767	LXN	3
ILMN_1774028	0.0227336	0.00891329	0.0109566	767	MTFR1	8
ILMN_1653200	-0.0110187	0.00432153	0.0109819	767	SLC22A17	14
ILMN_1658858	-0.0114031	0.00447459	0.0110227	767	SP140L	2
ILMN_1700180	-0.0116882	0.00458761	0.0110428	767
ILMN_3278132	0.0198944	0.00781028	0.0110605	767
ILMN_2374633	0.0267389	0.0104999	0.0110801	767	ZWILCH	15
ILMN_1773865	0.0308689	0.0121233	0.011091	767	HSPA5	9
ILMN_1711361	0.0152146	0.00597785	0.0111252	767	ZNF319	16
ILMN_1706706	0.0218929	0.00860604	0.011165	767	DCAF7	17
ILMN_1778236	0.0227529	0.00894641	0.011186	767
ILMN_1745282	0.0533867	0.0209971	0.0112071	767	MOK	14
ILMN_1732688	0.0274507	0.010797	0.0112118	767	DUT	15
ILMN_1670353	0.024149	0.00951017	0.0113123	767	RAD51AP1	12
ILMN_2047599	0.024405	0.00961533	0.011349	767
ILMN_1653579	0.103995	0.0409762	0.0113554	767
ILMN_2130635	0.0229725	0.00905919	0.0114236	767	FOXRED2	22
ILMN_1662964	0.0272545	0.0107492	0.011434	767	PRMT3	11
ILMN_2349138	0.0427722	0.0168862	0.011516	767	C1orf56	1
ILMN_3194276	0.00744593	0.00293994	0.0115255	767
ILMN_2325347	0.0229493	0.00906301	0.0115413	767
ILMN_1664167	0.0218612	0.00863665	0.0115734	767
ILMN_1685289	0.0242531	0.00958269	0.0115826	767	SLC5A2	16
ILMN_1688621	0.0228904	0.00904456	0.0115854	767
ILMN_1779832	0.013379	0.00528715	0.0115975	767	KTN1-AS1	14
ILMN_1808219	0.03013	0.0119227	0.0117084	767	HEATR3	16
ILMN_2309446	-0.0252845	0.0100092	0.0117411	767	RBBP6	16
ILMN_1716876	0.0485076	0.0192033	0.0117448	767
ILMN_2342903	-0.00919263	0.00364191	0.0118074	767	GIPC1	19
ILMN_2174045	-0.0104438	0.00413768	0.0118091	767	RNF126P1	17
ILMN_1659952	0.0197352	0.00782326	0.0118571	767	MTMR2	11
ILMN_1695020	0.0165599	0.00656556	0.0118701	767	NEK3	13
ILMN_1737953	-0.0114367	0.00453438	0.011871	767
ILMN_2225746	-0.0150517	0.00596812	0.0118781	767	BORCS6	17
ILMN_1770378	0.0244949	0.00971324	0.0118848	767
ILMN_1769245	0.0275272	0.010916	0.0118874	767	GLIPR1	12
ILMN_1675584	0.00887073	0.00351776	0.0118884	767	HTRA4	8
ILMN_1669015	0.0171253	0.00679214	0.0119001	767	XPNPEP1	10
ILMN_2325978	-0.0365163	0.0144834	0.0119033	767		19
ILMN_1758963	-0.0227067	0.00900687	0.0119105	767
ILMN_1775269	0.0117301	0.00465511	0.0119513	767	EID1	15
ILMN_3251648	0.00920805	0.00365681	0.012011	767
ILMN_1671005	-0.0370055	0.0146983	0.0120242	767	IRF2BP2	1
ILMN_1704253	-0.0253777	0.0100834	0.0120545	767	C6orf106	6
ILMN_2413251	-0.0271804	0.0108021	0.0120732	767
ILMN_1815668	-0.0235609	0.00936548	0.0120903	767
ILMN_1679267	0.0175689	0.00698698	0.0121311	767	TGM2	20
ILMN_2294431	0.0205909	0.00818996	0.0121431	767	CDC25C	5
ILMN_1671353	0.0258503	0.0102878	0.0121928	767	IL12A	3
ILMN_3236713	0.0228002	0.00908396	0.0122879	767	SNHG1	11
ILMN_1671911	-0.0331162	0.0132024	0.0123432	767	MTA1	14
ILMN_1754507	-0.03311	0.0132023	0.0123584	767	IRF4	6
ILMN_1661428	0.0140934	0.00562459	0.0124362	767	ATP11C	X
ILMN_2370208	-0.0257327	0.0102754	0.0124843	767	CMTM3	16
ILMN_3206866	0.0128246	0.00512214	0.0125028	767
ILMN_3236036	-0.0272254	0.0108798	0.0125514	767
ILMN_1814281	0.0230097	0.00919678	0.0125673	767
ILMN_3246219	-0.00979096	0.00391515	0.0126074	767	PRKAR1B	7
ILMN_1804174	0.0256609	0.0102618	0.0126134	767
ILMN_1773380	-0.0195656	0.00782637	0.012637	767	UNC13D	17
ILMN_1699636	-0.0278663	0.0111611	0.0127512	767	ACIN1	14
ILMN_1768055	0.00861379	0.00345357	0.0128431	767	GFER	16
ILMN_1715661	0.0236586	0.00948926	0.012878	767
ILMN_1704619	0.01685	0.00675901	0.0128859	767	VPS29	12
ILMN_2077550	0.0204514	0.00820468	0.0128974	767
ILMN_1742611	0.0199821	0.00802552	0.0129999	767	C1orf52	1
ILMN_1728057	0.0186214	0.00748036	0.0130161	767	SDHAF4	6
ILMN_1671509	-0.0674416	0.0271018	0.0130493	767
ILMN_2297710	-0.0247765	0.00995783	0.0130607	767	PLEKHB2	2
ILMN_1810759	0.0239806	0.00963917	0.0130723	767
ILMN_1734544	0.0409469	0.0164666	0.0131147	767	WTAP	6
ILMN_3203729	-0.00667932	0.00268613	0.0131173	767		8
ILMN_1774839	0.0104169	0.00419066	0.0131487	767	RBM19	12
ILMN_3222631	-0.00916571	0.00368839	0.013175	767
ILMN_1674782	-0.0070093	0.00282118	0.0131931	767	LINC01116	2
ILMN_1686401	-0.0202573	0.00815433	0.0132036	767
ILMN_1662318	0.0263601	0.0106168	0.0132541	767	CCDC59	12
ILMN_1691151	-0.0197115	0.00794207	0.0132894	767		11
ILMN_1760849	0.0353237	0.0142391	0.0133323	767	NETO2	16
ILMN_2222234	0.0275307	0.0111028	0.0133744	767
ILMN_3236821	-0.0358579	0.0144619	0.0133799	767	HSPB1P1	9
ILMN_1703153	-0.0207496	0.00837252	0.0134237	767	GLYR1	16
ILMN_1716922	0.0168895	0.00681599	0.0134375	767
ILMN_2364574	-0.00747982	0.00302001	0.0134813	767
ILMN_1695717	0.0159399	0.00645235	0.0137211	767	RBM41	X
ILMN_1757702	-0.0382496	0.0154833	0.0137217	767
ILMN_1792176	-0.0224579	0.00909623	0.0137775	767	TADA3	3
ILMN_1789809	-0.0285233	0.0115564	0.0138055	767	RPL13AP6	10
ILMN_3224815	-0.00775849	0.00314476	0.0138466	767	AHCYL2	7
ILMN_1805474	0.0211976	0.00859292	0.0138563	767	C1orf131	1
ILMN_1794063	-0.0200623	0.00813677	0.0139037	767	ANKRD27	19
ILMN_1758025	-0.0116759	0.00473638	0.0139222	767
ILMN_2068991	-0.0171653	0.00696842	0.0139938	767
ILMN_1716717	0.00855343	0.00347241	0.0139954	767
ILMN_2050023	0.0242481	0.00984477	0.0140037	767	SVBP	1
ILMN_1769027	0.0204488	0.00831858	0.0141921	767	C1orf56	1
ILMN_1716678	0.0224163	0.00912228	0.0142268	767	NPC2	14
ILMN_1815063	-0.0133769	0.00544435	0.014238	767	PXK	3
ILMN_1713603	-0.0351657	0.0143171	0.0142709	767	PRKCB	16
ILMN_1773413	-0.0188895	0.00769213	0.0142907	767	DOCK9	13
ILMN_1675788	0.0195019	0.00794303	0.0143095	767	ZNF175	19
ILMN_1682197	0.0218267	0.00889256	0.0143382	767	NFXL1	4
ILMN_2255579	-0.0166508	0.00678832	0.0144029	767	RAB37	17
ILMN_1746929	-0.0172827	0.00705717	0.0145587	767	PGS1	17
ILMN_1807031	0.0116438	0.00475462	0.0145593	767	C14orf28	14
ILMN_1716157	-0.0329417	0.0134524	0.0145663	767	UBAP2	9
ILMN_1786697	0.00888527	0.00362874	0.0145738	767	TRIM9	14
ILMN_1745787	-0.0106034	0.00433072	0.0145801	767	POLL	10
ILMN_1756542	-0.0145629	0.00594941	0.0146055	767	TBC1D17	19
ILMN_1738675	-0.0306934	0.0125442	0.0146446	767	PTPN6	12
ILMN_1759475	0.00755472	0.0030891	0.0146935	767	TAS2R39	7
ILMN_1804451	-0.0147779	0.00604966	0.0148088	767	LEO1	15
ILMN_1685538	-0.0328593	0.0134523	0.0148131	767
ILMN_1754332	0.0286722	0.0117498	0.0149122	767	HSPA8	11
ILMN_1812616	-0.027409	0.0112339	0.0149276	767	MYO1C	17
ILMN_1745962	-0.0223325	0.00915802	0.0149802	767	FBXO7	22
ILMN_1678678	0.0244353	0.0100214	0.0149912	767	TRAPPC4	11
ILMN_1830598	-0.00897497	0.00368922	0.015221	767	LINC01063	3
ILMN_1697554	-0.0315353	0.0129647	0.0152362	767		X
ILMN_1656316	-0.0243613	0.010019	0.015273	767	ZMYM3	X
ILMN_1903568	0.0267645	0.0110074	0.0152738	767	CNIH1	14
ILMN_1735155	0.0187562	0.00772342	0.0153999	767	GLB1	3
ILMN_1812312	0.0167348	0.0068968	0.0154857	767
ILMN_1813148	-0.0084503	0.00348331	0.0155073	767	TOM1	22
ILMN_2336781	0.0272753	0.011247	0.0155427	767	SOD2	6
ILMN_1796411	-0.0177933	0.00733798	0.0155552	767
ILMN_1659843	0.0221823	0.00914881	0.0155642	767	DNAJC3	13
ILMN_1664233	-0.0293898	0.0121231	0.0155782	767		1
ILMN_1803197	0.019668	0.00811424	0.0155948	767	RAB3IP	12
ILMN_1753182	0.00869519	0.00358905	0.0156455	767	COL20A1	20
ILMN_1697989	0.00847724	0.00350018	0.0156776	767	RPS12	6
ILMN_1684051	-0.0394956	0.0163084	0.015684	767
ILMN_2059886	-0.0221773	0.00915778	0.0156886	767	TTC38	22
ILMN_1795429	0.0440368	0.0181893	0.015717	767	VCL	10
ILMN_2352121	0.0304767	0.0125923	0.0157493	767
ILMN_1718069	0.0206657	0.00854058	0.0157735	767	MIS12	17
ILMN_1712587	0.0118526	0.00490097	0.0158295	767	ARSB	5
ILMN_2238928	0.0228701	0.00945849	0.0158497	767
ILMN_1654246	-0.0143086	0.00591874	0.0158687	767	SIRT6	19
ILMN_1694486	0.0184191	0.0076219	0.0159078	767	TCIRG1	11
ILMN_1796074	0.0308918	0.0128022	0.0160641	767	CLUL1	18
ILMN_1657983	-0.0254861	0.010568	0.0161243	767	TERF2IP	16
ILMN_1765310	-0.0343872	0.0142615	0.016144	767	TCEAL2	X
ILMN_2127298	-0.0154006	0.00638785	0.0161558	767	F2RL3	19
ILMN_1742976	0.015381	0.00638163	0.0161871	767	ZFP30	19
ILMN_1698441	-0.0161221	0.00668955	0.0161942	767	KAT6B	10
ILMN_3307252	0.00774997	0.00321643	0.0162185	767	STMN1	1
ILMN_1752285	-0.0188352	0.00781738	0.0162224	767
ILMN_1669268	-0.0096893	0.00402181	0.016232	767	MEX3D	19
ILMN_1738751	-0.0406422	0.0168785	0.0162878	767		4
ILMN_2408240	-0.0106138	0.00440812	0.0162943	767	DTNBP1	6
ILMN_1708351	-0.00805589	0.00334711	0.0163368	767
ILMN_1722151	0.00787554	0.00327272	0.0163544	767	EIF6	20
ILMN_3242540	0.0288652	0.012	0.0163988	767
ILMN_1813685	-0.0272332	0.0113228	0.01641	767	RAB29	1
ILMN_3203656	0.0094585	0.00393325	0.0164287	767
ILMN_1800602	0.0236635	0.00984171	0.0164439	767	GCA	2
ILMN_1661373	-0.0137496	0.00572146	0.0164995	767	AGPAT3	21
ILMN_1766851	0.0217331	0.00904376	0.0165024	767	TMEM126B	11
ILMN_1714738	0.0242879	0.0101085	0.0165196	767	SCMH1	1
ILMN_3208140	0.042238	0.0175837	0.0165468	767
ILMN_3245625	0.0257272	0.0107115	0.0165596	767	RFX7	15
ILMN_1667171	-0.00786234	0.00327679	0.0166687	767
ILMN_2081398	-0.0266103	0.011093	0.0166938	767	KIF3B	20
ILMN_1728426	-0.0282865	0.0117919	0.0166957	767	INPPL1	11
ILMN_2385097	-0.0163933	0.0068369	0.0167425	767	NDRG3	20
ILMN_2152502	-0.0195774	0.00816849	0.0167913	767
ILMN_1766916	0.022068	0.00920894	0.0168063	767	RPAP3	12
ILMN_2315569	0.0149178	0.00623302	0.0169443	767
ILMN_1765409	0.0194919	0.00814483	0.0169531	767	STAM	10
ILMN_1669645	-0.0127989	0.00535086	0.0170093	767	PKD1	16
ILMN_3286813	-0.0426403	0.0178328	0.0170469	767
ILMN_1705093	0.0185831	0.00778396	0.0172204	767	ORC5	7
ILMN_1801226	-0.0124735	0.00522609	0.0172476	767	DOCK6	19
ILMN_3310730	0.00777221	0.00325745	0.0172848	767	MIR1277	X
ILMN_1759464	0.00891698	0.00373777	0.0173005	767	SPRTN	1
ILMN_1706583	0.0234462	0.00983287	0.0173552	767	DLAT	11
ILMN_1847979	0.00749853	0.00314631	0.0174113	767
ILMN_1660305	0.0201052	0.00843603	0.0174123	767	PDE12	3
ILMN_1759097	0.0344788	0.0144731	0.0174591	767	MLLT11	1
ILMN_1820657	-0.00814563	0.0034213	0.017525	767
ILMN_1717229	0.0251202	0.010554	0.0175577	767	AAED1	9
ILMN_1725169	0.0157512	0.00661852	0.0175721	767	INTS12	4
ILMN_1873967	0.00650156	0.00273246	0.017595	767		7
ILMN_1689002	-0.0158161	0.00665593	0.0177441	767	DTX1	12
ILMN_1788166	0.0242232	0.0101949	0.0177558	767	TTK	6
ILMN_1708782	0.0160498	0.00675833	0.017812	767	MFAP3	5
ILMN_1807737	-0.0251989	0.0106111	0.0178147	767
ILMN_1688089	-0.0288138	0.0121376	0.0178547	767
ILMN_1664756	0.0244205	0.0102876	0.0178618	767
ILMN_1711606	-0.0214438	0.00903445	0.0178727	767
ILMN_2368971	0.0227343	0.00958013	0.0178963	767
ILMN_3298582	-0.0308826	0.0130202	0.0179522	767
ILMN_3247802	-0.0155281	0.006547	0.0179582	767		9
ILMN_1859036	0.01031	0.00434782	0.0179814	767	GPR180	13
ILMN_1709611	0.0169411	0.00714706	0.0180271	767
ILMN_1796407	0.0176109	0.00743004	0.0180329	767	SS18L2	3
ILMN_2191428	-0.0135588	0.00572098	0.0180434	767
ILMN_2312719	0.0233225	0.00984676	0.018115	767	EXOSC9	4
ILMN_1727540	0.0207072	0.00874393	0.0181328	767	C1orf112	1
ILMN_1777483	0.0206757	0.00873084	0.0181356	767	APOOL	X
ILMN_2298588	-0.00810714	0.00342391	0.018151	767	TAOK2	16
ILMN_1689110	-0.0196553	0.00830508	0.0182067	767		16
ILMN_1676440	-0.0147951	0.00625163	0.0182095	767
ILMN_1716272	0.0331015	0.0139898	0.0182334	767	KBTBD8	3
ILMN_1743635	0.0172409	0.00729155	0.018312	767	ALG14	1
ILMN_2134855	0.0109237	0.00462002	0.0183164	767	PIN4	X
ILMN_1912745	0.0129	0.00545709	0.0183422	767
ILMN_1675428	0.00702811	0.0029732	0.0183457	767	PCDHGC3	5
ILMN_1784860	0.0213962	0.00905252	0.0183583	767	RFC3	13
ILMN_2356786	-0.0273578	0.011575	0.0183602	767	ADD1	4
ILMN_2353633	0.0318821	0.0134915	0.0183801	767	ZNF333	19
ILMN_1670801	0.0204551	0.00865701	0.018394	767	MTR	1
ILMN_1752340	-0.0289469	0.0122536	0.01842	767	GCC1	7
ILMN_1813491	0.0219861	0.00930707	0.0184204	767
ILMN_1796712	0.0178977	0.0075809	0.0184901	767	S100A10	1
ILMN_3243042	0.0140588	0.00595812	0.0185536	767
ILMN_1749521	0.0213388	0.00904564	0.0185833	767	SLC35E3	12
ILMN_1679322	0.0162325	0.00688251	0.0186076	767	SH2D4A	8
ILMN_2217513	0.0125088	0.00530581	0.0186558	767	GLB1L	2
ILMN_1699676	0.0156067	0.00662015	0.0186612	767	SPTSSA	14
ILMN_1665423	0.0196227	0.00832379	0.0186624	767	ZFP91	11
ILMN_1756998	-0.016498	0.00699917	0.0186765	767
ILMN_1659914	0.00948396	0.00402424	0.0186982	767	AK8	9
ILMN_1706200	-0.00738498	0.00313532	0.0187627	767	MED15	22
ILMN_3279964	0.0090353	0.0038367	0.0187853	767
ILMN_3283449	-0.0413213	0.0175506	0.0188131	767		3
ILMN_2384544	0.0234733	0.00997094	0.0188253	767	ADAM15	1
ILMN_1799860	0.017786	0.00755535	0.0188294	767	PIGM	1
ILMN_1765124	0.00848662	0.0036057	0.0188506	767	LINC00616	4
ILMN_1802089	-0.0241976	0.0102844	0.0188925	767	SYMPK	19
ILMN_1683916	0.0164277	0.00698673	0.0189715	767	PEX13	2
ILMN_2199554	-0.0131877	0.00560917	0.0189804	767
ILMN_1708987	-0.00802086	0.00341255	0.0190155	767	HSD11B1L	19
ILMN_1656487	0.00691509	0.00294213	0.0190173	767	FGA	4
ILMN_1705213	0.016479	0.00701282	0.0190438	767	TMBIM1	2
ILMN_1723494	-0.0110919	0.00472177	0.0190819	767	SIRT2	19
ILMN_1671478	-0.0270307	0.01151	0.0191144	767	CKB	14
ILMN_2157544	-0.0251373	0.0107147	0.0192364	767	GBF1	10
ILMN_2371724	0.0167112	0.00712353	0.0192443	767	CEACAM1	19
ILMN_1808584	0.0228879	0.00976081	0.0192975	767	COX20	1
ILMN_2143314	-0.0418395	0.0178658	0.0194519	767
ILMN_1706238	0.026358	0.0112578	0.0194815	767	CSE1L	20
ILMN_1745806	0.0188733	0.00806262	0.0195058	767	PEMT	17
ILMN_2151281	-0.0147577	0.0063103	0.0196189	767	GABARAPL1	12
ILMN_2226917	-0.0267395	0.011434	0.0196225	767	SUSD6	14
ILMN_3244065	-0.0247117	0.010569	0.0196468	767	C9orf69	9
ILMN_1666078	-0.0750091	0.0320864	0.0196679	767
ILMN_1829148	0.00658785	0.00282028	0.0197639	767		X
ILMN_2168314	0.0171353	0.00733779	0.0197996	767	PGM3	6
ILMN_1694502	0.0221647	0.00949311	0.0198201	767	PRIM1	12
ILMN_3292678	0.012761	0.00546774	0.0198697	767
ILMN_1685327	-0.0122243	0.00523903	0.0198993	767	SON	21
ILMN_1749738	-0.00826878	0.00354383	0.0199006	767	NECAB3	20
ILMN_2401155	-0.0172306	0.00738566	0.0199173	767	PUM1	1
ILMN_1776602	0.0133613	0.00573021	0.0199833	767	RNASE4	14
ILMN_1785804	-0.00706577	0.00303055	0.0199947	767
ILMN_1814122	0.0190282	0.00816516	0.0200528	767
ILMN_2358652	-0.023486	0.0100803	0.020081	767	NXF1	11
ILMN_1774258	-0.0104723	0.00449984	0.0202209	767	L3MBTL1	20
ILMN_1812478	0.0192707	0.00828288	0.0202578	767
ILMN_1778985	0.0153903	0.00661551	0.0202668	767	PRMT9	4
ILMN_2227133	-0.0187203	0.0080553	0.0203979	767	CMTR1	6
ILMN_2089902	0.0136881	0.0058906	0.0204114	767	NUS1	6
ILMN_3247163	-0.008325	0.00358281	0.020418	767
ILMN_1733249	0.00868479	0.00373956	0.0204821	767	GNB4	3
ILMN_1755222	0.0146252	0.00629976	0.0205285	767	CAAP1	9
ILMN_1777708	0.00723853	0.00311801	0.0205302	767	CARMIL3	14
ILMN_1706305	0.0181404	0.00782243	0.0206657	767
ILMN_1684746	0.0206572	0.00890842	0.0206761	767	IPO11	5
ILMN_3229859	0.0182415	0.00786691	0.0206804	767	MOB4	2
ILMN_1758717	-0.0201452	0.00869295	0.0207539	767	SUPT6H	17
ILMN_1696622	0.0105297	0.00454409	0.0207643	767	SLC38A6	14
ILMN_1807945	-0.027079	0.011688	0.0207866	767
ILMN_1660847	-0.0190466	0.00822212	0.0208037	767	PFKFB3	10
ILMN_1747160	0.0221762	0.00957577	0.020839	767
ILMN_2145050	0.008751	0.00378128	0.0209252	767
ILMN_2079786	0.00702115	0.00303463	0.0209593	767	NUAK1	12
ILMN_1671142	-0.0138878	0.00600254	0.0209603	767	GPR68	14
ILMN_3256674	0.0125907	0.00544378	0.0210048	767
ILMN_1713369	-0.0227563	0.00984381	0.0210665	767
ILMN_1749829	0.0281208	0.0121665	0.0210889	767
ILMN_1767184	0.00698412	0.00302346	0.0211646	767
ILMN_1754199	-0.0252208	0.0109197	0.0211829	767	BCL7B	7
ILMN_3279675	-0.0195583	0.00847264	0.0212522	767
ILMN_2397776	-0.011127	0.00482184	0.0212963	767	ASB6	9
ILMN_1733374	0.0222786	0.00965945	0.0213642	767
ILMN_2257833	0.0148183	0.00642589	0.0213848	767	BBS7	4
ILMN_1660793	0.0249151	0.0108055	0.0213995	767	PKMYT1	16
ILMN_1743204	-0.0138824	0.0060209	0.0214034	767
ILMN_1717337	0.0259126	0.0112421	0.0214448	767	2007-03-01	2
ILMN_1736176	0.021803	0.00945986	0.0214546	767	PLK1	16
ILMN_1762003	0.0195984	0.0085043	0.0214699	767	SEC62	3
ILMN_3264466	-0.0119914	0.00520516	0.0215133	767	MTFR1L	1
ILMN_1695821	-0.0187317	0.00813171	0.021526	767	ACTR1B	2
ILMN_1797482	-0.0205663	0.0089291	0.0215399	767	GCDH	19
ILMN_1708858	-0.0248008	0.010768	0.0215452	767	CSNK1E	22
ILMN_1668619	0.00874312	0.0037969	0.0215732	767	FAM234B	12
ILMN_1898022	0.00878772	0.00381687	0.0215936	767	OXNAD1	3
ILMN_1686562	-0.0213717	0.00928909	0.0216845	767		8
ILMN_3237030	-0.00748802	0.00325649	0.0217598	767	PLA2G2C	1
ILMN_3278070	0.0247348	0.010758	0.0217725	767
ILMN_1798654	0.019388	0.00843452	0.0218036	767	MCM6	2
ILMN_1651504	-0.016405	0.00713893	0.0218426	767	FAM193A	4
ILMN_1662328	0.019652	0.00855193	0.0218431	767	CNNM3	2
ILMN_2367707	-0.0274564	0.011949	0.0218522	767	PKN1	19
ILMN_1703557	0.00621316	0.00270401	0.0218546	767	GOLGA2P9	19
ILMN_1765132	-0.0229308	0.00997988	0.0218575	767	LACTB	15
ILMN_1706344	-0.0364459	0.0158638	0.0218731	767	ABHD6	3
ILMN_1682910	0.0199356	0.00867996	0.021913	767	SLC35B3	6
ILMN_1736628	-0.0134255	0.00584789	0.0219681	767	ORAI3	16
ILMN_3233272	-0.0074248	0.00323484	0.0219979	767	SNAI3-AS1	16
ILMN_1756572	0.031721	0.0138245	0.0220385	767	COQ2	4
ILMN_1739032	0.0173702	0.00757061	0.0220463	767	TMEM70	8
ILMN_1729515	0.00983191	0.00428517	0.0220472	767	PIN4	X
ILMN_1720113	0.0135949	0.00592575	0.0220583	767	PTPRO	12
ILMN_1769451	0.0208713	0.00909751	0.0220601	767	ILVBL	19
ILMN_1794551	-0.0300092	0.013096	0.0222167	767	T	6
ILMN_1726138	-0.0253807	0.0110765	0.0222211	767
ILMN_1811258	-0.0269493	0.0117618	0.0222297	767	RELB	19
ILMN_3248069	-0.0158545	0.00692325	0.0223002	767
ILMN_1762275	0.0172405	0.00752966	0.0223216	767	CSE1L	20
ILMN_1728521	-0.0118879	0.00519299	0.0223476	767
ILMN_1811866	-0.0118188	0.00516302	0.0223533	767	MRPL20	1
ILMN_1666280	0.0122781	0.00536669	0.0224291	767	COX11	17
ILMN_1683316	-0.0114706	0.00501446	0.0224485	767	PRR18	6
ILMN_2405756	-0.0140657	0.00615095	0.0224927	767	VAMP1	12
ILMN_1751561	-0.0244036	0.0106729	0.0225078	767	CAMK1D	10
ILMN_1673752	0.00932915	0.00408017	0.0225097	767	TMEM234	1
ILMN_1801869	0.0191252	0.00836595	0.0225325	767	WDR75	2
ILMN_3266606	0.0256019	0.0112006	0.022551	767
ILMN_1828584	-0.00824631	0.003611	0.0226747	767
ILMN_2213199	0.0208746	0.00914094	0.022676	767	CEP44	4
ILMN_3235143	0.0124294	0.00544383	0.0227012	767
ILMN_2094106	0.0259072	0.011347	0.0227037	767	HSD17B12	11
ILMN_1695092	0.0227835	0.00998009	0.0227199	767	WRB	21
ILMN_3228595	0.0240729	0.0105449	0.0227207	767		1
ILMN_2105223	-0.0154294	0.00676066	0.0227594	767	FCRL5	1
ILMN_1810127	-0.0202144	0.00885953	0.0227933	767
ILMN_2412571	-0.0145871	0.00639838	0.0229037	767	TUBGCP6	22
ILMN_1751395	-0.0115416	0.00506403	0.0229436	767	KRI1	19
ILMN_2174127	0.0259558	0.0113893	0.0229545	767	DCBLD2	3
ILMN_2226015	0.00667191	0.00292882	0.0230107	767	LRRK2	12
ILMN_1703860	0.00631785	0.0027744	0.02306	767
ILMN_1779997	0.00621211	0.00272898	0.0231106	767
ILMN_1821388	0.00685601	0.00301236	0.023134	767
ILMN_1815121	-0.0200854	0.00882893	0.0231951	767	PLAGL1	6
ILMN_2041046	0.0248459	0.0109226	0.0232079	767
ILMN_2408885	0.0113531	0.00499176	0.0232297	767	HDAC9	7
ILMN_3299579	0.0160103	0.00704036	0.0232476	767	ADK	10
ILMN_1776076	0.0170905	0.0075179	0.0232944	767	POFUT1	20
ILMN_1681724	0.00796955	0.0035071	0.023349	767	FPGS	9
ILMN_1703891	0.0280157	0.0123346	0.0234151	767	TBC1D9	4
ILMN_1698038	0.013883	0.00611609	0.0235007	767	MINDY4	7
ILMN_1804851	0.022311	0.00982926	0.023504	767
ILMN_1667825	0.0246213	0.0108474	0.0235085	767	MLKL	16
ILMN_2412922	-0.0234731	0.0103427	0.0235232	767	ELMSAN1	14
ILMN_1809607	-0.0135239	0.00595895	0.0235251	767	PPIF	10
ILMN_1789196	-0.0434348	0.0191437	0.0235634	767	TPM2	9
ILMN_1909466	-0.0103154	0.004547	0.0235797	767
ILMN_1768311	-0.0365937	0.0161323	0.023596	767
ILMN_2360229	-0.0236262	0.0104163	0.0236047	767	MAPKAP1	9
ILMN_1658821	-0.0232816	0.0102656	0.0236224	767	SAMD1	19
ILMN_3228585	-0.0261185	0.011518	0.0236403	767
ILMN_3239709	-0.00624443	0.0027544	0.0236744	767
ILMN_1838891	0.00658665	0.00290615	0.0237124	767
ILMN_1800262	0.00686243	0.00302964	0.0237956	767	PPFIA3	19
ILMN_1666453	0.030116	0.0132964	0.0238041	767	STK3	8
ILMN_1658416	0.0212333	0.00937629	0.0238284	767
ILMN_1747197	0.0149958	0.00662228	0.023836	767
ILMN_1845221	0.00739136	0.00326409	0.023836	767
ILMN_2407589	-0.0142945	0.00631549	0.0239	767	CTDP1	18
ILMN_1712944	-0.0271476	0.0119959	0.0239213	767		19
ILMN_1770673	-0.0242244	0.0107049	0.0239308	767	AKNA	9
ILMN_1662470	-0.0102518	0.00453093	0.0239484	767	C10orf35	10
ILMN_1737462	0.0234181	0.0103506	0.0239567	767	OXR1	8
ILMN_2329114	-0.00746567	0.00330014	0.0239732	767	EAF1	3
ILMN_1683063	-0.00747492	0.00330449	0.0239844	767
ILMN_1661439	-0.027012	0.0119422	0.0239946	767
ILMN_1658422	-0.0145985	0.00645443	0.0240008	767
ILMN_3309021	-0.00935052	0.00413441	0.0240104	767		17
ILMN_2186806	-0.0402026	0.0177822	0.0240599	767
ILMN_1730937	-0.00612747	0.0027106	0.0240771	767	SLC39A13	11
ILMN_1668748	-0.0198748	0.00879346	0.0241005	767
ILMN_1816599	0.0100737	0.0044593	0.024173	767		8
ILMN_3236021	-0.0295406	0.0130776	0.0241825	767
ILMN_3246663	0.00711129	0.00314825	0.0241863	767
ILMN_1669456	-0.0244709	0.0108365	0.0242247	767	NME3	16
ILMN_3274601	0.0129173	0.00572079	0.0242398	767
ILMN_2381064	0.0175369	0.00776898	0.0242812	767	TPD52	8
ILMN_1694277	-0.0103688	0.00459466	0.0243176	767
ILMN_2051867	0.0168919	0.00748598	0.0243331	767	PTCD2	5
ILMN_2066020	0.0159666	0.00707773	0.0243698	767
ILMN_1679555	0.0151414	0.00671253	0.0243824	767	TIMM23	10
ILMN_2410772	-0.0240075	0.0106443	0.0243982	767	KEAP1	19
ILMN_1774261	-0.0108174	0.00479652	0.0244091	767	DOK4	16
ILMN_1751234	0.021587	0.0095733	0.024431	767	C1GALT1C1	X
ILMN_1658902	-0.0217164	0.00963084	0.024433	767
ILMN_1660321	0.00743314	0.00329708	0.0244595	767	CDH24	14
ILMN_1768127	0.0189875	0.00842814	0.0245599	767	EBNA1BP2	1
ILMN_1748077	0.0212209	0.00942026	0.024572	767	DDX59	1
ILMN_1768814	-0.0279939	0.0124309	0.0246185	767
ILMN_1678579	0.0211903	0.00941127	0.0246416	767	CPT2	1
ILMN_1776047	-0.0354857	0.0157612	0.0246502	767
ILMN_1794914	-0.00775309	0.00344362	0.0246512	767	UBTD1	10
ILMN_1659895	-0.0226997	0.0100829	0.02466	767
ILMN_2096116	0.0274505	0.0121964	0.0246984	767
ILMN_1736112	-0.0286911	0.0127483	0.0247055	767	ARHGAP10	4
ILMN_1782377	0.0299011	0.0132921	0.0247718	767
ILMN_1750011	0.00768978	0.00341942	0.0248158	767	EXOC7	17
ILMN_1755862	0.0184998	0.00822643	0.0248179	767	PFAS	17
ILMN_1690922	0.0110963	0.00493594	0.0248666	767	MAST2	1
ILMN_1762712	-0.0128058	0.00569683	0.0248784	767	HHEX	10
ILMN_1676737	-0.0190725	0.00848635	0.0249068	767	2002-09-01	2
ILMN_3236634	0.0147673	0.00657523	0.0250052	767	MYADML2	17
ILMN_2093864	0.00896709	0.00399352	0.0250371	767	ZNF571	19
ILMN_1727055	0.021775	0.00969821	0.025047	767	PARPBP	12
ILMN_1793829	0.0190641	0.00849146	0.0250578	767	TMCO1	1
ILMN_1809495	-0.0265603	0.0118343	0.0251062	767
ILMN_1811507	-0.00954597	0.00425404	0.0251295	767	LBH	2
ILMN_1753165	-0.0233439	0.0104065	0.0251804	767	WNK1	12
ILMN_1898362	0.0107945	0.00481221	0.0251836	767
ILMN_1761486	0.0212736	0.00948466	0.0251964	767	BORA	13
ILMN_1728907	0.0227751	0.0101546	0.0252034	767	SCAMP1	5
ILMN_1670664	0.0107731	0.00480368	0.0252133	767	PPP1R15B	1
ILMN_1745533	-0.0151142	0.00674375	0.0253085	767	FAM117A	17
ILMN_1810488	-0.0187436	0.00836543	0.0253488	767	NFYC	1
ILMN_1742929	0.0163235	0.00728949	0.0254326	767	HESX1	3
ILMN_3243999	-0.0131152	0.00585735	0.0254468	767
ILMN_2210729	-0.0177077	0.00790873	0.0254523	767	STYXL1	7
ILMN_1791896	0.0172507	0.00770926	0.0255414	767	EBAG9	8
ILMN_1696532	-0.0155804	0.00696311	0.0255471	767	RBBP5	1
ILMN_2327947	-0.00868859	0.00388327	0.0255552	767	SLC25A25	9
ILMN_2181867	0.00941118	0.00420629	0.0255577	767
ILMN_1678140	0.0144546	0.0064629	0.0256139	767
ILMN_1765159	0.0122158	0.00546317	0.0256481	767	ELMOD2	4
ILMN_1866290	0.0088288	0.00394851	0.0256512	767	LINC02180	16
ILMN_1663577	-0.0145975	0.00653014	0.0256888	767	S100PBP	1
ILMN_1659894	0.0128776	0.00576092	0.0256938	767	SLC25A26	3
ILMN_1730202	-0.0136781	0.00611977	0.0257116	767	MAGEF1	3
ILMN_1812728	0.00733662	0.0032827	0.0257203	767
ILMN_2364272	0.0232135	0.0103867	0.0257212	767	MBNL2	13
ILMN_2229242	0.0213279	0.00954337	0.0257266	767	LSM3	3
ILMN_3241563	0.00872835	0.00390576	0.0257331	767
ILMN_1721116	-0.0219921	0.0098484	0.0258436	767
ILMN_1813893	0.0119793	0.00536569	0.0258766	767
ILMN_1772131	-0.0246414	0.0110494	0.0260399	767	IL1R2	2
ILMN_2365383	-0.0127512	0.00571807	0.0260489	767	ENO3	17
ILMN_1702279	-0.0259731	0.0116481	0.0260594	767	KIF3B	20
ILMN_1793430	0.00802694	0.00359989	0.0260626	767
ILMN_2111187	0.0306723	0.0137587	0.026094	767	ELOVL6	4
ILMN_1656670	-0.0400761	0.0179818	0.0261338	767
ILMN_3235694	-0.0150087	0.0067354	0.0261594	767
ILMN_1657769	-0.00949379	0.00426081	0.0261701	767	EIF5	14
ILMN_2147105	-0.0305626	0.0137168	0.0261738	767
ILMN_1695711	-0.00884334	0.00396954	0.0261944	767	FAM105A	5
ILMN_1725485	0.0113187	0.00508091	0.0262023	767	RGS17	6
ILMN_1811443	-0.00969192	0.00435068	0.0262025	767	AVP	20
ILMN_1707199	0.0171967	0.0077208	0.0262268	767	WDR20	14
ILMN_2099249	0.01698	0.00762395	0.026235	767	MTERF1	7
ILMN_1734826	0.0178729	0.00802571	0.0262514	767	NUP88	17
ILMN_3277134	0.0101798	0.00457127	0.0262538	767
ILMN_1743097	-0.0327079	0.0146879	0.0262575	767
ILMN_1744240	0.0167593	0.00752626	0.0262635	767	TBC1D31	8
ILMN_2377025	-0.00821835	0.00369077	0.0262664	767	TCOF1	5
ILMN_1778203	0.0164709	0.00739728	0.0262741	767	CLN5	13
ILMN_3251567	0.0111426	0.00500471	0.0262868	767	FBXW2	9
ILMN_1654516	-0.0259665	0.0116701	0.026379	767	TMEM120A	7
ILMN_1682494	0.022067	0.00992212	0.0264486	767
ILMN_1703041	-0.00878516	0.00395159	0.0265049	767	IDUA	4
ILMN_2078226	0.00768671	0.0034576	0.026509	767	MAGEH1	X
ILMN_2409220	0.0270711	0.0121831	0.0265841	767	HMMR	5
ILMN_1709112	0.00723383	0.00325659	0.0266341	767	CHM	X
ILMN_1799728	0.0118284	0.00532612	0.026665	767
ILMN_1667257	0.0176523	0.00794888	0.026672	767	SDHB	1
ILMN_1703686	-0.0128318	0.00577938	0.0267037	767	BRF1	14
ILMN_1816070	0.00695145	0.00313099	0.0267074	767
ILMN_2049021	0.0213363	0.00961083	0.0267203	767
ILMN_3251728	0.0167979	0.00756725	0.0267341	767
ILMN_1885728	-0.0209558	0.00944201	0.0267615	767
ILMN_1686458	0.0171408	0.00772404	0.0267801	767	CEP152	15
ILMN_2070052	-0.0339305	0.0152905	0.0267864	767
ILMN_1804263	-0.0153106	0.00689981	0.0267911	767	ZNF76	6
ILMN_1677910	-0.0105836	0.00476964	0.0267939	767	EEF1DP3	13
ILMN_1710333	-0.0122944	0.0055421	0.0268334	767	FNBP1	9
ILMN_1761199	0.014502	0.00653862	0.0268658	767	SLCO2B1	11
ILMN_3250273	0.023716	0.0106948	0.0268904	767	TMOD2	15
ILMN_1658678	0.0160229	0.00722743	0.0269298	767
ILMN_1742577	0.0207056	0.00934323	0.0269883	767	GTPBP4	10
ILMN_1769018	-0.0064435	0.00290778	0.0269992	767	PCSK4	19
ILMN_1667213	-0.0201653	0.0091013	0.0270198	767	DFFA	1
ILMN_2115696	0.0190401	0.00859787	0.0270983	767	USP42	7
ILMN_2042771	0.0211795	0.00956461	0.0271089	767
ILMN_3283573	-0.0160389	0.00724453	0.0271388	767
ILMN_1680591	0.045231	0.0204357	0.0271801	767	RTKN	2
ILMN_2168449	0.0182666	0.0082537	0.0271929	767	DHX15	4
ILMN_2387696	0.0125221	0.00565888	0.0272145	767
ILMN_1675695	0.0186317	0.00842101	0.0272359	767	PDS5B	13
ILMN_1819939	0.00802099	0.00362671	0.0272968	767
ILMN_1807514	-0.0140724	0.00636473	0.027342	767	ZNF394	7
ILMN_1658709	0.0111815	0.00505848	0.0273798	767	LAMB1	7
ILMN_1857861	0.00736557	0.00333291	0.0274148	767
ILMN_2212763	-0.0274371	0.0124258	0.0275461	767		19
ILMN_2347314	-0.012769	0.00578382	0.0275711	767	ARNT	1
ILMN_1666169	-0.0260489	0.0118056	0.0276568	767
ILMN_1742541	0.0192734	0.00873748	0.0277034	767	ZNF518A	10
ILMN_1741350	0.0126694	0.00574409	0.027717	767	CEP70	3
ILMN_1721093	-0.0224244	0.0101685	0.0277415	767	TAF10	11
ILMN_2330845	-0.0206924	0.00938403	0.0277575	767
ILMN_3251565	-0.0126907	0.00575638	0.0277877	767	RNASEH2C	11
ILMN_1664330	0.0104926	0.00475973	0.0278003	767	CEACAM1	19
ILMN_1786379	-0.00871009	0.00395118	0.0278024	767	SYNGR3	16
ILMN_1717674	-0.017457	0.0079206	0.0278323	767	PEPD	19
ILMN_3240222	-0.035423	0.0160765	0.0278743	767	PRAG1	8
ILMN_3243549	0.011991	0.00544298	0.0279016	767
ILMN_1651819	-0.0248004	0.011258	0.0279086	767	GALNT11	7
ILMN_1738712	0.0250027	0.0113586	0.0280292	767	GPR180	13
ILMN_1709809	-0.0186114	0.00845565	0.0280406	767	SNU13	22
ILMN_1777362	0.0106543	0.00484169	0.0280779	767
ILMN_1705783	-0.0204253	0.00928316	0.0280977	767	NXF1	11
ILMN_1656628	0.024245	0.0110208	0.0281203	767	WDR4	21
ILMN_2198893	-0.0385848	0.0175393	0.0281224	767
ILMN_1675038	-0.0175401	0.00797485	0.0281566	767	PRMT2	21
ILMN_1770692	0.0212706	0.00967295	0.0281892	767	WDR12	2
ILMN_3238137	0.0215536	0.00980335	0.0282164	767
ILMN_1731287	-0.0269373	0.0122527	0.0282245	767	ARFGAP3	22
ILMN_2124790	-0.0167436	0.00761812	0.0282686	767
ILMN_2382403	0.0256725	0.0116809	0.0282724	767	FCGR2B	1
ILMN_2358457	-0.0299351	0.0136211	0.0282799	767
ILMN_2325185	-0.0103349	0.0047045	0.0283445	767	TYSND1	10
ILMN_1659285	0.0198677	0.00904543	0.0283708	767	PSMG1	21
ILMN_3276209	-0.0215462	0.00981127	0.0283979	767
ILMN_2049293	0.00860589	0.00391936	0.0284212	767	CD84	1
ILMN_1812787	-0.0111167	0.0050631	0.0284288	767
ILMN_1674758	0.00736648	0.00335527	0.0284384	767
ILMN_2394438	0.014323	0.00652468	0.0284602	767
ILMN_1743256	0.00866266	0.00394714	0.0284982	767	DLEU2	13
ILMN_3307700	0.0255968	0.0116635	0.0285023	767
ILMN_1815366	-0.0098351	0.00448256	0.0285407	767	ENGASE	17
ILMN_1766280	-0.0074011	0.0033733	0.0285446	767
ILMN_1856533	0.0077031	0.00351163	0.0285756	767
ILMN_1793384	-0.0390767	0.0178188	0.028618	767	JAK1	1
ILMN_1714433	-0.0353436	0.0161171	0.0286237	767	MARCKSL1	1
ILMN_1686920	0.0621013	0.0283252	0.0286593	767
ILMN_1738424	-0.0285272	0.0130128	0.0286738	767
ILMN_1743352	-0.0183442	0.00836969	0.0287097	767	TBCC	6
ILMN_1762466	0.0153458	0.0070053	0.028793	767	BBS4	15
ILMN_1785438	0.00664044	0.00303153	0.0288032	767	METTL1	12
ILMN_1768784	0.0153395	0.00700443	0.028839	767
ILMN_1713129	-0.0136555	0.00623788	0.0289001	767	TTF1	9
ILMN_2210129	0.0204836	0.00935815	0.02892	767
ILMN_2229032	-0.0181155	0.0082783	0.0289595	767	NME6	3
ILMN_1691570	0.0200041	0.00914181	0.0289681	767	METTL5	2
ILMN_1716596	0.0177016	0.00808969	0.0289703	767	NSMAF	8
ILMN_2392635	-0.0206026	0.00941955	0.0290395	767
ILMN_1727479	-0.0238853	0.0109219	0.0290621	767	TPRG1L	1
ILMN_3241332	0.0157721	0.00721295	0.0290827	767
ILMN_1749789	0.0116419	0.00532504	0.0291109	767	HIST1H1D	6
ILMN_1747344	-0.0163863	0.0074991	0.029195	767
ILMN_3235373	0.00823126	0.00376789	0.0292334	767
ILMN_1769671	0.0250997	0.0114917	0.0292641	767	RYK	3
ILMN_1668374	-0.0108392	0.00496293	0.0292738	767	ITGB5	3
ILMN_1765649	-0.0211957	0.00971863	0.0295031	767	IRF3	19
ILMN_1807501	0.0244177	0.0112024	0.0295965	767	GINS4	8
ILMN_1797155	0.0158187	0.00726476	0.0297629	767	C17orf75	17
ILMN_1668469	-0.025625	0.0117712	0.0298025	767	KIAA0922	4
ILMN_1659106	-0.0226638	0.0104128	0.0298313	767	PHLDA3	1
ILMN_1778381	-0.0248759	0.0114322	0.0298757	767	RBM14-RBM4	11
ILMN_2218856	-0.0534609	0.0245707	0.0298869	767
ILMN_1737947	0.0209369	0.00962274	0.0298887	767	LSM5	7
ILMN_1768558	-0.0289525	0.0133069	0.0298899	767
ILMN_1742332	0.0242935	0.0111659	0.0298959	767	KCTD12	13
ILMN_1726755	0.0189636	0.00871804	0.0299313	767	COPS4	4
ILMN_1795158	-0.0356157	0.016375	0.0299467	767	FGR	1
ILMN_1782618	-0.0237647	0.0109271	0.0299595	767	C9orf16	9
ILMN_2120762	-0.0643158	0.0295728	0.0299597	767	T	6
ILMN_2055165	-0.0195769	0.00900173	0.0299623	767
ILMN_2329958	0.0203504	0.00936418	0.0300809	767	ABI1	10
ILMN_1740430	0.0178225	0.00820407	0.0301437	767	ZBTB46	20
ILMN_1758798	-0.0259353	0.0119397	0.0301594	767
ILMN_1655635	-0.018292	0.0084231	0.0302006	767	METTL3	14
ILMN_1672527	0.00632537	0.00291326	0.0302317	767	NUAK1	12
ILMN_1694174	0.0133159	0.00613393	0.0302595	767	TRIM68	11
ILMN_1790797	-0.0237678	0.0109487	0.0302619	767	VPS28	8
ILMN_1803813	0.0158016	0.00727931	0.0302681	767	ASTE1	3
ILMN_2215631	0.0218575	0.0100715	0.0303078	767	OTUD6B	8
ILMN_1785218	0.0130361	0.00600686	0.0303101	767	MTCH2	11
ILMN_1729142	0.0306436	0.0141214	0.0303245	767	CENPV	17
ILMN_1794912	0.015501	0.00714421	0.0303461	767
ILMN_3248990	0.00616989	0.00284401	0.0303682	767
ILMN_3294623	0.00805658	0.00371463	0.0304107	767	SATB1-AS1	3
ILMN_2379520	-0.0144827	0.00667974	0.0304663	767	HAGH	16
ILMN_1786189	0.0201311	0.00928743	0.030511	767	NIFK	2
ILMN_3236530	0.0100009	0.00461695	0.0306208	767	IRS2	13
ILMN_1674522	0.0217845	0.0100587	0.0306499	767
ILMN_1662795	0.0596409	0.0275408	0.0306656	767	CA2	8
ILMN_2230577	-0.0176174	0.00813626	0.0306849	767	KCTD7	7
ILMN_1749073	0.00734894	0.00339441	0.0307067	767	TCEAL5	X
ILMN_1801822	0.0179915	0.00831016	0.0307074	767	C18orf25	18
ILMN_1711156	0.0129677	0.00598992	0.0307137	767
ILMN_3307799	-0.0253275	0.0116995	0.0307205	767
ILMN_1744959	0.018699	0.00863774	0.0307223	767	NFX1	9
ILMN_1724495	0.0208234	0.00961941	0.0307285	767	SESTD1	2
ILMN_1791356	0.0084749	0.00391534	0.0307433	767	CYP2E1	10
ILMN_1739384	-0.00828401	0.00382743	0.0307551	767	USP35	11
ILMN_1771264	0.0224672	0.0103862	0.0308473	767	PDIA3	15
ILMN_3290577	-0.0259493	0.011998	0.0308768	767		5
ILMN_1722634	0.0249159	0.0115336	0.0310713	767	NUCB1	19
ILMN_1655418	-0.0264186	0.0122294	0.0310741	767	CAPNS1	19
ILMN_1783843	-0.0226357	0.0104785	0.0310787	767	MIIP	1
ILMN_1736796	0.016899	0.00782312	0.0310835	767	RB1CC1	8
ILMN_3188124	-0.0232653	0.0107708	0.0310911	767
ILMN_1791597	-0.00580746	0.00269	0.031179	767
ILMN_1733050	-0.0109177	0.00505788	0.0312069	767	SEC31B	10
ILMN_1707534	0.0164363	0.00761632	0.0312468	767	NKRF	X
ILMN_2292123	0.0143228	0.00663727	0.0312551	767	COL4A3BP	5
ILMN_1666305	0.0238767	0.0110665	0.0312834	767	CDKN3	14
ILMN_1750641	-0.0112291	0.005207	0.0313642	767	SRCAP	16
ILMN_2046896	0.0175866	0.00815913	0.0314491	767
ILMN_1767801	-0.0144212	0.00669105	0.0314609	767	SAMD10	20
ILMN_3235677	0.00692113	0.00321245	0.0315264	767
ILMN_3247492	-0.0077742	0.00361011	0.0316064	767
ILMN_1795561	-0.0229033	0.0106362	0.0316152	767	CAMK1D	10
ILMN_1753819	-0.0268906	0.012494	0.031699	767	RFFL	17
ILMN_2073235	-0.032695	0.0151912	0.0317031	767
ILMN_1680018	0.00816494	0.0037945	0.0317383	767	RIPK4	21
ILMN_1916137	-0.00702995	0.00326861	0.03182	767	ACOXL	2
ILMN_1807994	0.0215317	0.0100123	0.0318382	767
ILMN_1753467	-0.0154529	0.00718673	0.0318632	767	SAMD4B	19
ILMN_1706571	-0.0140081	0.00651809	0.0319499	767	SLC35D2	9
ILMN_1678423	0.0185044	0.00861048	0.0319548	767	SIAE	11
ILMN_2378664	0.0111511	0.005189	0.0319591	767
ILMN_1677765	0.0234564	0.0109176	0.0319985	767	LRP8	1
ILMN_1658743	-0.018392	0.00856699	0.0321306	767	CCNDBP1	15
ILMN_2389810	0.0231734	0.0107949	0.0321432	767	ATP11C	X
ILMN_1813796	0.00761327	0.00354657	0.0321458	767	TMEM169	2
ILMN_3240446	0.015604	0.0072702	0.0321746	767
ILMN_3201600	-0.011541	0.00537765	0.0321893	767	EEF1A1P10	7
ILMN_1726359	0.015641	0.00728907	0.0322129	767
ILMN_1844925	0.0085042	0.00396528	0.0323054	767	TRIM55	8
ILMN_3250209	0.016207	0.00755828	0.032337	767
ILMN_1778677	0.0197681	0.00921932	0.0323428	767	MRS2	6
ILMN_1757230	0.0130562	0.00608951	0.0323549	767	ZNF250	8
ILMN_1763516	-0.0082147	0.00383156	0.0323625	767
ILMN_3237286	0.00758644	0.00353922	0.0323966	767
ILMN_1672295	-0.0204298	0.00953339	0.0324413	767	ZC3H12A	1
ILMN_1815303	0.0190517	0.00889094	0.032454	767	RMDN1	8
ILMN_1765644	0.0251788	0.011751	0.0324635	767	COMMD8	4
ILMN_1754894	0.0399581	0.0186527	0.0325029	767	C1orf162	1
ILMN_1779034	-0.0194418	0.00907595	0.0325108	767
ILMN_1675852	0.01772	0.00827722	0.032616	767
ILMN_1898691	0.0102527	0.00478931	0.0326212	767		3
ILMN_1721636	-0.0218849	0.0102232	0.032624	767	TSC22D4	7
ILMN_1664440	-0.0223731	0.0104536	0.0326629	767	TUBGCP4	15
ILMN_1668683	-0.0202719	0.00947319	0.0326882	767	KMT2A	11
ILMN_2320330	-0.0355312	0.0166064	0.0327136	767	MAL	2
ILMN_2377980	-0.0275519	0.0128773	0.0327167	767	PPP1CA	11
ILMN_1724233	-0.00972538	0.00454832	0.0328254	767	ZNF280D	15
ILMN_1761259	0.01555	0.00727327	0.0328468	767	EXT2	11
ILMN_1796458	-0.0173682	0.00812652	0.0329073	767	GABARAPL2	16
ILMN_1656938	0.0254038	0.0118907	0.0329726	767	SLC37A2	11
ILMN_1740319	-0.030046	0.0140771	0.0331395	767
ILMN_2072401	0.00993034	0.0046533	0.0331682	767
ILMN_3256712	-0.00644822	0.00302176	0.0331776	767	SUN2	22
ILMN_2130441	-0.029753	0.0139442	0.0331947	767
ILMN_1771523	-0.00844383	0.0039576	0.0332067	767
ILMN_1687941	-0.0273118	0.0128053	0.0332655	767	RNF4	4
ILMN_1695362	-0.0152367	0.00714688	0.0333414	767	ZNF32	10
ILMN_2415011	-0.0268385	0.0125923	0.0333907	767	DCTD	4
ILMN_2050434	0.0143575	0.00673716	0.0334115	767
ILMN_1687384	0.0548208	0.0257278	0.0334352	767	IFI6	1
ILMN_1689251	-0.00740583	0.00347634	0.0334727	767	ATL1	14
ILMN_1740351	-0.0144359	0.00677779	0.0335119	767
ILMN_1740864	-0.017215	0.00808277	0.0335155	767	TREML2	6
ILMN_1660111	0.0188746	0.00886343	0.033544	767
ILMN_1660498	-0.00847513	0.00398	0.0335492	767
ILMN_1758687	-0.0128411	0.00603184	0.0335947	767	DDX39A	19
ILMN_1751871	-0.0120147	0.0056462	0.0336736	767	STK11	19
ILMN_1752214	0.0677052	0.0318175	0.0336741	767
ILMN_2377459	-0.0143936	0.00676593	0.0337209	767	CYTH2	19
ILMN_1706057	0.0192959	0.00907113	0.0337366	767
ILMN_1795933	-0.00935051	0.00439704	0.0337889	767	CHMP7	8
ILMN_2328666	-0.0354624	0.0166786	0.033816	767	CD83	6
ILMN_1770848	-0.0095488	0.00449107	0.03382	767	SFXN4	10
ILMN_1714765	-0.0157734	0.0074191	0.0338303	767
ILMN_1670172	0.0194753	0.00916161	0.0338553	767	WDR33	2
ILMN_3207060	0.00880568	0.00414305	0.033884	767
ILMN_1757872	-0.0296827	0.0139679	0.0339126	767	PRAG1	8
ILMN_1668134	-0.0680244	0.0320156	0.0339409	767
ILMN_2406439	-0.00951605	0.00448076	0.0340226	767	SPTBN4	19
ILMN_1750901	0.00909858	0.00428424	0.0340246	767	GNAT1	3
ILMN_1698673	0.0144094	0.00678638	0.034063	767
ILMN_2192072	0.10272	0.0484135	0.0341943	767	MMP7	11
ILMN_1763104	-0.0256222	0.0120768	0.0342036	767	TRAF4	17
ILMN_1719857	-0.0123174	0.0058059	0.0342092	767	GRIPAP1	X
ILMN_3226291	-0.0372116	0.0175426	0.034237	767
ILMN_1754186	-0.00952871	0.00449254	0.0342541	767	PHLDB2	3
ILMN_2186216	0.0366079	0.0172611	0.034269	767	GOLIM4	3
ILMN_1899886	0.0117232	0.00552868	0.0343026	767		8
ILMN_1758941	0.0209867	0.0099021	0.034388	767	REEP5	5
ILMN_1660551	-0.0152049	0.00717436	0.0343954	767	CRAMP1	16
ILMN_1781097	0.0188933	0.00891991	0.0345001	767	UBXN4	2
ILMN_1751328	-0.00824703	0.00389389	0.0345139	767
ILMN_2049766	0.0207452	0.00979576	0.0345284	767
ILMN_1797046	-0.0120964	0.00571227	0.0345406	767	MTHFSD	16
ILMN_1889527	0.00816578	0.00385612	0.0345413	767		12
ILMN_1684576	-0.00760451	0.00359146	0.0345606	767
ILMN_1728810	0.0146982	0.00694218	0.0345744	767	NDUFS1	2
ILMN_1690870	0.00954363	0.00450767	0.0345768	767	SATB1-AS1	3
ILMN_2135798	0.0148658	0.00702244	0.0346028	767	RFXANK	19
ILMN_1809478	0.0201428	0.00952157	0.0347224	767
ILMN_1669878	0.0178279	0.00842859	0.0347498	767	GUSB	7
ILMN_1754579	-0.0209628	0.00991596	0.0348462	767	SYNE2	14
ILMN_2179063	0.00887123	0.0041969	0.034871	767	DDHD2	8
ILMN_1842319	0.00766437	0.0036263	0.0348885	767		6
ILMN_2379527	-0.00847899	0.00401241	0.0349196	767	ELMO1	7
ILMN_2352009	-0.0283103	0.0133982	0.0349362	767	ACADVL	17
ILMN_2221076	0.0125357	0.00593305	0.0349486	767	NCBP3	17
ILMN_1782635	0.0160818	0.00761405	0.0350119	767
ILMN_1716488	-0.0280471	0.0132792	0.035013	767	PACS1	11
ILMN_1754220	0.0216889	0.0102715	0.0350601	767	SF3A2	19
ILMN_1805192	0.0194517	0.00921357	0.0350904	767	ITPRIP	10
ILMN_3292963	-0.0065346	0.00309534	0.0350986	767
ILMN_1835521	0.012996	0.00615787	0.0351536	767	C2orf88	2
ILMN_1781207	-0.0365202	0.0173052	0.0351631	767	FYN	6
ILMN_3307827	-0.0251888	0.0119369	0.0351805	767
ILMN_1784113	-0.0165654	0.00785205	0.0352208	767	NAT14	19
ILMN_1679158	0.00758428	0.00359577	0.0352619	767	FAAH2	X
ILMN_1713482	0.0165183	0.00783349	0.0353086	767	CWC15	11
ILMN_2330341	-0.0191624	0.00908766	0.0353144	767
ILMN_3292155	-0.00613473	0.00290978	0.0353404	767	USP30	12
ILMN_2175465	0.0179116	0.00849616	0.0353502	767
ILMN_1765021	0.0184346	0.0087466	0.0353996	767
ILMN_1693685	-0.0233728	0.0110897	0.0354016	767	LINC00116	2
ILMN_1698849	0.0063201	0.00299921	0.0354323	767	CHRNA2	8
ILMN_1674866	-0.0160086	0.00759951	0.0354951	767	TADA3	3
ILMN_1798712	-0.0134509	0.00638581	0.0355086	767	C3orf62	3
ILMN_1786045	-0.00815009	0.0038694	0.0355159	767	SLC24A5	15
ILMN_1737283	0.0189436	0.00899581	0.0355567	767
ILMN_1796397	0.0169546	0.00805204	0.0355736	767
ILMN_1773964	-0.0321643	0.0152793	0.0356205	767	H1FX	3
ILMN_1772208	-0.0202538	0.00962222	0.035638	767	CCDC88B	11
ILMN_1672405	0.0244936	0.0116402	0.0356958	767
ILMN_1728467	0.0168555	0.00801127	0.0357182	767	GHITM	10
ILMN_1665970	0.00904376	0.004299	0.0357435	767	ADGRL2	1
ILMN_3197097	-0.0292309	0.0138962	0.035758	767	TSTD1	1
ILMN_1840957	0.00689683	0.0032788	0.0357633	767
ILMN_1660837	0.0171966	0.0081755	0.0357662	767	CLCN3	4
ILMN_1761155	-0.0168606	0.00801708	0.0357967	767
ILMN_1836744	-0.00996496	0.00473938	0.0358402	767	PGP	16
ILMN_1860911	0.00757749	0.00360466	0.0358792	767
ILMN_1704617	0.00870344	0.00414086	0.0359055	767	EFHB	3
ILMN_1815759	-0.0153414	0.00729918	0.0359093	767	CTDP1	18
ILMN_1728355	-0.0215281	0.0102429	0.0359128	767
ILMN_1756311	0.0170638	0.00811957	0.0359304	767
ILMN_1774589	0.0153852	0.00732178	0.0359535	767	IQCC	1
ILMN_2383489	-0.0221088	0.0105223	0.0359674	767
ILMN_1670331	0.00879443	0.00418589	0.0359822	767
ILMN_1756550	0.0158172	0.00752934	0.0360021	767	NUP62CL	X
ILMN_1660357	-0.010502	0.00500224	0.0361163	767	LINC-PINT	7
ILMN_1876371	0.00593567	0.00282747	0.0361308	767
ILMN_1741621	0.00700686	0.00333827	0.0361605	767		4
ILMN_1800976	-0.0152153	0.00724954	0.0361743	767	NFATC3	16
ILMN_1666049	-0.0198271	0.00944829	0.0362015	767
ILMN_1766222	-0.0286427	0.0136493	0.0362025	767	LARP4B	10
ILMN_1747355	-0.055448	0.0264278	0.0362361	767		17
ILMN_2058337	0.0144326	0.00688197	0.0363195	767
ILMN_1746492	-0.0185782	0.00886061	0.0363578	767
ILMN_1747023	-0.00900881	0.00429779	0.0364091	767	PTGIR	19
ILMN_1798458	-0.0098718	0.00471237	0.0365228	767	KAZN	1
ILMN_1861437	0.00662097	0.00316207	0.0366121	767		8
ILMN_1762407	0.0166596	0.00795892	0.0366721	767	CABLES2	20
ILMN_3225649	0.0070734	0.00337923	0.0366722	767		1
ILMN_3251545	0.0229562	0.0109694	0.0367129	767
ILMN_3244640	0.0223482	0.010679	0.0367155	767
ILMN_3304821	0.0071162	0.00340304	0.0368576	767
ILMN_1711828	-0.0209072	0.00999861	0.0368685	767	ANKRD10	13
ILMN_1800543	0.0173993	0.00832269	0.0369065	767
ILMN_1748614	-0.00726009	0.00347319	0.0369301	767	RELT	11
ILMN_1684929	0.0243895	0.0116701	0.0369668	767	TOPBP1	3
ILMN_1664094	0.00625078	0.00299094	0.036968	767	P2RY13	3
ILMN_1723232	-0.0160873	0.00769822	0.0369823	767
ILMN_1681340	0.01887	0.00903007	0.0369881	767
ILMN_1751243	-0.00762725	0.00365032	0.0370071	767	OSBPL7	17
ILMN_1805481	0.0176686	0.00845771	0.0370447	767
ILMN_3301502	0.00718766	0.00344096	0.0370628	767
ILMN_2061446	0.0116823	0.00559562	0.0371614	767	NCEH1	3
ILMN_1728298	-0.00693209	0.00332134	0.037218	767	SBK1	16
ILMN_1728802	-0.0135486	0.00649386	0.0372881	767
ILMN_2142117	0.022572	0.0108195	0.0373	767
ILMN_2166524	0.0138473	0.00663763	0.0373053	767	CCNYL1	2
ILMN_1696843	-0.0417445	0.0200138	0.0373404	767
ILMN_3282773	-0.0235417	0.0112883	0.0373678	767
ILMN_1664488	0.0108312	0.0051937	0.0373708	767	WDFY4	10
ILMN_2347798	0.0751814	0.0360514	0.0373762	767	IFI6	1
ILMN_1802894	0.0184134	0.00883128	0.0374104	767	VKORC1L1	7
ILMN_2171789	-0.0176205	0.00845193	0.0374317	767	TRAF1	9
ILMN_1674825	0.00618787	0.00296813	0.0374335	767
ILMN_1655622	0.0243191	0.0116681	0.0374824	767
ILMN_1790100	0.02065	0.00990779	0.037484	767	DDIAS	11
ILMN_2404917	-0.0155043	0.00744012	0.0375146	767	AFAP1L2	10
ILMN_2137464	-0.0237636	0.0114037	0.0375174	767	DVL3	3
ILMN_1721833	-0.0201685	0.009681	0.0375671	767	IER5	1
ILMN_2044617	0.0195537	0.00938948	0.0376396	767	MTERF3	8
ILMN_1796106	-0.0172457	0.00828442	0.0377134	767	MGAT4B	5
ILMN_1686151	0.00630518	0.00302967	0.0377648	767	MED14	X
ILMN_2130180	-0.0296814	0.0142638	0.0377887	767
ILMN_1723323	0.00612508	0.00294367	0.0377998	767
ILMN_2345837	-0.0176741	0.00849509	0.0378233	767
ILMN_3246766	-0.0504149	0.0242353	0.0378495	767
ILMN_1764557	0.00718023	0.00345232	0.037886	767	FITM1	14
ILMN_1799128	0.0199328	0.00958545	0.0379177	767	SLC30A9	4
ILMN_2354617	-0.00671561	0.00323061	0.0379856	767	DYRK1B	19
ILMN_1678629	0.019122	0.00920032	0.0380171	767	DOCK7	1
ILMN_1715674	-0.0280019	0.0134738	0.0380318	767
ILMN_1748057	-0.0132021	0.00635312	0.03805	767
ILMN_1726906	-0.00795638	0.0038293	0.0380763	767	AKT1S1	19
ILMN_1765017	0.00784147	0.00377442	0.0380977	767	COL6A2	21
ILMN_1737146	0.0238355	0.0114733	0.0381027	767	TRAM1	8
ILMN_1878889	0.00891775	0.00429268	0.0381071	767
ILMN_1728844	-0.00811758	0.00390841	0.0381516	767	PTPRN2	7
ILMN_2083559	-0.0135191	0.00650962	0.0381669	767	AP5Z1	7
ILMN_2119555	0.00610042	0.00293824	0.0382194	767	TMTC3	12
ILMN_1705241	0.0194822	0.00938371	0.0382237	767	TDRD7	9
ILMN_1673944	-0.0177072	0.00853176	0.0382911	767	MANBAL	20
ILMN_1766275	-0.0275059	0.0132642	0.0384538	767	PIK3CD	1
ILMN_1756139	-0.0179732	0.0086684	0.0384802	767
ILMN_1895915	0.012153	0.00586391	0.0385643	767
ILMN_1674985	-0.0533982	0.0257703	0.0386042	767	TMEM51	1
ILMN_1741662	0.00625293	0.00301777	0.0386088	767	TMC5	16
ILMN_1729816	0.0143225	0.00691293	0.0386267	767	VDAC3	8
ILMN_1679700	-0.0370102	0.0178661	0.0386567	767
ILMN_1683453	0.00602447	0.00290833	0.0386632	767	FRAS1	4
ILMN_1669669	0.00971696	0.00469137	0.0386831	767	KCMF1	2
ILMN_1774091	0.0180739	0.0087274	0.0387115	767	FECH	18
ILMN_2228976	0.0201758	0.00974854	0.038835	767	EIF1AY	Y
ILMN_1760620	0.0137174	0.00662911	0.0388679	767	TMEM33	4
ILMN_1690761	-0.0298356	0.0144226	0.0389238	767	SURF4	9
ILMN_3310950	-0.00592719	0.00286534	0.038933	767	MIR203A	14
ILMN_2320964	-0.034351	0.0166105	0.0389849	767	ADAR	1
ILMN_1871361	0.00640186	0.00309583	0.0389974	767
ILMN_1685813	0.00886307	0.00428625	0.0390077	767
ILMN_1751904	-0.0113769	0.00550308	0.0390467	767	EDNRB	13
ILMN_1788968	0.00640841	0.00310009	0.039066	767	C11orf65	11
ILMN_1765417	0.0142797	0.00690868	0.0390899	767	RBBP9	20
ILMN_1787026	0.01602	0.00775282	0.0391447	767
ILMN_1735143	-0.0120222	0.00581841	0.0391551	767	THEMIS2	1
ILMN_1808395	-0.0270662	0.0131009	0.0391787	767
ILMN_1789123	0.0203989	0.00987919	0.0392875	767	PLK4	4
ILMN_1803560	-0.0229832	0.0111308	0.0392881	767	LAT2	7
ILMN_1724533	0.0269634	0.0130584	0.0392882	767	LY96	8
ILMN_3299702	-0.0147181	0.00712975	0.0393357	767	MUC19	12
ILMN_1698252	0.0138301	0.00669988	0.0393442	767	FANCB	X
ILMN_1752476	-0.00630092	0.00305333	0.0394025	767
ILMN_3245541	0.00641372	0.00310852	0.039436	767
ILMN_1670666	-0.024714	0.0119816	0.0394945	767	RAB12	18
ILMN_3243664	-0.0422556	0.0204865	0.0394992	767
ILMN_3224888	-0.00852083	0.00413119	0.0395041	767
ILMN_1655482	-0.0178947	0.00867655	0.039517	767
ILMN_1724925	-0.00722106	0.00350132	0.0395211	767
ILMN_1686416	0.00845557	0.00410055	0.0395517	767	GRIP2	3
ILMN_1769883	0.0170256	0.00825663	0.0395524	767
ILMN_1672884	0.0164118	0.00795907	0.0395553	767	MTFMT	15
ILMN_1697906	0.017492	0.00848358	0.0395707	767	WBP4	13
ILMN_3249840	0.0111179	0.00539235	0.0395764	767
ILMN_3235216	-0.0144043	0.00698847	0.0396383	767
ILMN_1798083	-0.0153479	0.00744729	0.039665	767	C19orf44	19
ILMN_3246608	0.0246535	0.0119663	0.0397247	767	CENPV	17
ILMN_2119945	0.0156965	0.00761885	0.0397272	767	NDUFB3	2
ILMN_1748123	0.0175385	0.00851314	0.0397325	767	KLHL14	18
ILMN_1746457	0.0162707	0.00790117	0.0398176	767	GTF3C2	2
ILMN_1740487	-0.0169376	0.00822506	0.0398193	767	CMTM7	3
ILMN_1774617	0.0229803	0.0111611	0.0398477	767	NAB1	2
ILMN_1868532	0.00746574	0.0036263	0.039866	767
ILMN_1690899	-0.00627636	0.00304869	0.0398726	767	TBC1D5	3
ILMN_1665730	0.025832	0.0125529	0.039955	767
ILMN_2232712	0.00960542	0.00466878	0.0400012	767	MYO10	5
ILMN_1767560	0.0058792	0.0028579	0.0400202	767		5
ILMN_1651254	-0.0168305	0.00818162	0.0400269	767	LPP	3
ILMN_1726901	-0.0210548	0.0102371	0.0400653	767	KLC1	14
ILMN_1696311	0.0152332	0.00740678	0.0400703	767	IMPAD1	8
ILMN_2058975	0.0101926	0.00495601	0.0400744	767	UFL1	6
ILMN_1738648	-0.0152747	0.00742857	0.040113	767
ILMN_2074044	0.00924926	0.00449986	0.0401866	767	PLS1	3
ILMN_1796130	0.0165007	0.00802898	0.0402168	767
ILMN_2330861	0.021896	0.0106592	0.0403084	767	SMC4	3
ILMN_1731612	0.0199337	0.00970805	0.040394	767	UCHL5	1
ILMN_2385191	-0.0110354	0.0053769	0.0404851	767	QRICH1	3
ILMN_1679917	-0.0194203	0.00946411	0.0405226	767
ILMN_1753575	0.0119542	0.00582679	0.0405617	767	GP1BA	17
ILMN_1691181	0.0235426	0.0114772	0.0405956	767
ILMN_1654262	-0.0433364	0.0211269	0.0405964	767	ZMAT3	3
ILMN_1691884	0.0329074	0.0160431	0.0406008	767	STC2	5
ILMN_1814313	0.0100823	0.00491587	0.0406219	767
ILMN_1664577	0.0208584	0.0101726	0.0406734	767	DLD	7
ILMN_2175020	0.00671516	0.00327552	0.0407072	767	RPL32P3	3
ILMN_1656327	-0.0120228	0.00586495	0.0407237	767
ILMN_1757847	-0.0157143	0.00766698	0.040756	767	C11orf68	11
ILMN_1709474	-0.0147697	0.00720812	0.0408112	767	ALMS1	2
ILMN_1764321	0.0229508	0.0112028	0.0408476	767
ILMN_1880885	0.0138612	0.00676738	0.0408896	767		7
ILMN_3178043	0.00912164	0.00445427	0.040929	767	BEND7	10
ILMN_1682938	-0.0281563	0.0137496	0.0409341	767	ARF3	12
ILMN_1738580	0.0076234	0.00372377	0.0409895	767	NR2E1	6
ILMN_1709439	-0.0196141	0.00958103	0.0409937	767	CHMP1A	16
ILMN_1662578	0.0195397	0.00954626	0.0410267	767
ILMN_1659099	-0.0173987	0.00850435	0.0411244	767	ROCK2	2
ILMN_2234710	0.0110579	0.00540649	0.0411801	767	C12orf60	12
ILMN_1730630	0.0181784	0.00888895	0.0412033	767
ILMN_1860288	0.0177166	0.00866341	0.0412101	767	MBTPS2	X
ILMN_1656868	-0.0321105	0.0157029	0.0412215	767
ILMN_1702231	0.0293024	0.0143347	0.0412917	767
ILMN_2223010	0.0187981	0.00920043	0.0413894	767	VBP1	X
ILMN_1815519	-0.00883251	0.00432375	0.0414282	767	EPN2	17
ILMN_1906957	-0.00642228	0.00314395	0.0414331	767	LINC01364	1
ILMN_1727692	0.0203764	0.00997502	0.0414332	767	TRIT1	1
ILMN_2075334	0.0100153	0.00490735	0.0416179	767	HIST1H4C	6
ILMN_1784799	0.00720032	0.00352808	0.0416197	767		3
ILMN_1887349	0.00972516	0.00476652	0.0416753	767
ILMN_1709626	0.0138657	0.00679625	0.0416859	767
ILMN_1712888	0.0260488	0.0127734	0.0417751	767	HSPH1	13
ILMN_3278608	-0.00656077	0.00321724	0.0417807	767
ILMN_1872759	0.0211655	0.0103825	0.0418484	767	LINC01358	1
ILMN_1805590	0.0145008	0.00711559	0.0419168	767	LSM8	7
ILMN_1711048	-0.0189963	0.0093251	0.0419948	767	ZBTB17	1
ILMN_2373073	0.00853125	0.00418812	0.0420051	767	LIG4	13
ILMN_1792075	-0.0247646	0.0121585	0.042026	767	CD22	19
ILMN_1718990	-0.0111346	0.00546701	0.042038	767	NFRKB	11
ILMN_1709004	-0.00882733	0.00433447	0.0420524	767	CCDC91	12
ILMN_2370692	-0.015552	0.00763656	0.0420544	767	ANKZF1	2
ILMN_1763524	-0.00911849	0.00447797	0.0420765	767	LZTS2	10
ILMN_1718299	-0.00862929	0.00423869	0.0421233	767	PDE6G	17
ILMN_1673339	0.00569356	0.00279798	0.0422199	767		6
ILMN_3292551	-0.0366435	0.0180096	0.0422414	767		8
ILMN_1747870	0.0145974	0.00717498	0.0422597	767	CD3EAP	19
ILMN_2339691	-0.0149657	0.00735645	0.042272	767	SYVN1	11
ILMN_1808071	0.0209141	0.0102837	0.0423377	767	KIF14	1
ILMN_1695271	-0.0145576	0.00715878	0.0423557	767	RPP25	15
ILMN_3294106	-0.0234748	0.0115441	0.0423602	767
ILMN_1708841	-0.0205177	0.0100902	0.0423669	767	GOLPH3	5
ILMN_1807611	-0.0222453	0.0109422	0.0424116	767	PPIG	2
ILMN_3208330	-0.0244004	0.0120055	0.0424664	767
ILMN_1655485	0.0160494	0.00789915	0.0425333	767	SPRTN	1
ILMN_1700541	0.00993937	0.00489321	0.0425866	767	FBLN1	22
ILMN_1701131	0.0201229	0.00990695	0.0425933	767
ILMN_1684346	0.025126	0.0123769	0.0427079	767
ILMN_3282983	-0.0205847	0.0101401	0.0427116	767
ILMN_2393450	0.0266499	0.0131311	0.0427633	767	INF2	14
ILMN_1812139	0.00573704	0.00282764	0.0428256	767	RASSF2	20
ILMN_1719194	-0.00643645	0.00317334	0.0428894	767	IBSP	4
ILMN_1776325	0.0156044	0.00769447	0.0429186	767	UBE2Q1	1
ILMN_1657818	-0.00853066	0.00420704	0.0429485	767
ILMN_2235137	0.0202059	0.0099689	0.0430327	767	FANCD2	3
ILMN_1653165	-0.0189441	0.00934742	0.0430552	767	AAMP	2
ILMN_2384496	-0.0227109	0.0112069	0.0430715	767	ST6GAL1	3
ILMN_1696911	-0.0348731	0.0172096	0.043085	767
ILMN_1657857	-0.0168352	0.00830873	0.0431031	767
ILMN_1675365	0.00964068	0.00475814	0.0431089	767	LARP4	12
ILMN_1680955	0.0184055	0.00908427	0.0431151	767	AURKA	20
ILMN_1782543	-0.0405124	0.0199976	0.0431382	767
ILMN_2360705	0.0191427	0.00945175	0.0431951	767	ACSL3	2
ILMN_2358202	0.0170936	0.00844051	0.0432076	767	SRRT	7
ILMN_3272996	0.0152876	0.00754969	0.0432346	767
ILMN_1667716	-0.0142374	0.00703302	0.0432924	767	TMEM101	17
ILMN_1789599	-0.0161584	0.00798443	0.043357	767	NBL1	1
ILMN_1732318	-0.0258055	0.0127516	0.0433609	767	PTK2B	8
ILMN_1802971	-0.0141187	0.00697748	0.043385	767	FAM160B2	8
ILMN_2384591	-0.0204766	0.0101199	0.0433922	767	HN1	17
ILMN_2297626	0.0305916	0.0151204	0.0434125	767	PEG10	7
ILMN_1791147	-0.0173597	0.00858207	0.0434551	767	YPEL3	16
ILMN_1788457	0.0266919	0.0131978	0.0434906	767	ABCC4	13
ILMN_1708934	0.0636646	0.0314827	0.043515	767	ADM	11
ILMN_1666325	0.0118037	0.00583704	0.0435161	767
ILMN_1805410	-0.00732251	0.00362175	0.0435558	767	C15orf48	15
ILMN_1748090	-0.00890161	0.00440378	0.0436033	767
ILMN_1808765	0.0146181	0.00723199	0.0436078	767	ZNF25	10
ILMN_1772370	-0.0265211	0.0131221	0.0436296	767	ARHGEF1	19
ILMN_1343295	-0.024707	0.0122255	0.0436455	767
ILMN_1743145	0.0852112	0.0421672	0.0436617	767	ERAP2	5
ILMN_2105308	0.0182229	0.00901937	0.0437008	767	DPM1	20
ILMN_1651354	-0.0106244	0.00525999	0.0437595	767	SPP1	4
ILMN_3287068	-0.0160056	0.00792494	0.0437811	767
ILMN_1665547	0.00716741	0.00354898	0.0437893	767	CADPS	3
ILMN_1752027	-0.015587	0.00771858	0.0438057	767	UBE3B	12
ILMN_3236049	0.0107024	0.0053016	0.0438793	767	ZFAS1	20
ILMN_1669206	0.018473	0.00915094	0.0438802	767	SETD6	16
ILMN_1876308	0.0113406	0.0056199	0.0439591	767
ILMN_1811682	-0.0256902	0.0127341	0.0440115	767	CLIP2	7
ILMN_1753683	0.00659357	0.00326875	0.0440411	767
ILMN_1814773	0.00621649	0.00308275	0.0441052	767	SH3BP5-AS1	3
ILMN_3299558	-0.0223863	0.0111014	0.0441064	767	PNISR	6
ILMN_3248352	-0.0201168	0.00997972	0.0441861	767	CCDC88C	14
ILMN_1730631	0.0162536	0.00806411	0.0442091	767	WDCP	2
ILMN_1808677	0.0791693	0.0392828	0.0442283	767
ILMN_3249419	-0.0272703	0.0135316	0.0442346	767
ILMN_1793433	0.0201872	0.0100173	0.0442436	767
ILMN_1772123	0.0156152	0.00774977	0.0442742	767
ILMN_1763398	0.0114599	0.00568773	0.0442834	767	CLEC17A	19
ILMN_1857265	0.00813792	0.00403918	0.0442936	767
ILMN_1778401	-0.0258675	0.012841	0.0443239	767
ILMN_1738989	0.0256898	0.0127534	0.0443348	767	SYBU	8
ILMN_1667216	0.00607757	0.00301722	0.0443406	767	SMCO2	12
ILMN_1689655	-0.023087	0.0114617	0.0443424	767
ILMN_1671765	0.00961031	0.00477126	0.0443499	767	TRIM35	8
ILMN_1679655	-0.0242024	0.0120227	0.044471	767
ILMN_1658632	0.0240241	0.0119345	0.0444771	767
ILMN_1797005	-0.0285399	0.0141835	0.0445625	767	PGLS	19
ILMN_3285332	-0.00698032	0.00346932	0.0445816	767
ILMN_1826531	-0.0168254	0.00836263	0.0445856	767	ATXN7L3B	12
ILMN_1700549	0.0167268	0.00831372	0.0445878	767	ERLIN2	8
ILMN_1684591	0.0140416	0.00697974	0.0446081	767
ILMN_1753755	0.0123292	0.00613056	0.0446785	767	B4GALT2	1
ILMN_2339655	-0.0103028	0.00512301	0.0446807	767	MAPK7	17
ILMN_2365248	-0.0262697	0.0130631	0.0446906	767
ILMN_2104106	0.0195905	0.0097419	0.044694	767	XPR1	1
ILMN_1723185	-0.0232249	0.0115508	0.0447227	767	ELOF1	19
ILMN_1729130	-0.0154045	0.00766232	0.0447492	767	TMEM248	7
ILMN_1708105	0.0160743	0.00799685	0.0447864	767
ILMN_1745686	-0.0179115	0.00891107	0.0447914	767	MFHAS1	8
ILMN_1719695	-0.035069	0.0174534	0.0448704	767	NFKBIZ	3
ILMN_1779497	-0.00708096	0.00352421	0.0448762	767
ILMN_2411282	0.0185609	0.00924017	0.0449312	767	QSOX1	1
ILMN_1674302	0.0194244	0.00967045	0.0449396	767
ILMN_2377240	0.0139349	0.00694037	0.0450278	767
ILMN_1777325	0.0206922	0.0103071	0.045052	767	STAT1	2
ILMN_1808326	-0.00637601	0.00317651	0.0450888	767	NPAS3	14
ILMN_1703411	0.00763786	0.00380546	0.0451054	767	PARP3	3
ILMN_1726025	-0.0160762	0.00801156	0.0451534	767	ASXL1	20
ILMN_1755911	0.0107238	0.00534453	0.0451668	767	ING5	2
ILMN_1686555	-0.041227	0.0205504	0.0452053	767	FYN	6
ILMN_2149782	0.00672978	0.00335504	0.0452342	767	RAMP2	17
ILMN_1674236	-0.039016	0.0194543	0.0452728	767
ILMN_1676588	0.0324141	0.0161632	0.0452827	767	CEPT1	1
ILMN_1702911	-0.0110799	0.00552513	0.0452896	767	PKIG	20
ILMN_1728626	-0.0245243	0.0122303	0.0453061	767	WDR5	9
ILMN_2246328	0.0245729	0.0122582	0.0453692	767		1
ILMN_1743396	-0.0202113	0.0100837	0.0453978	767
ILMN_1771903	0.0182665	0.00911373	0.0454045	767		12
ILMN_1720373	0.0301605	0.0150482	0.0454067	767	SLC7A5	16
ILMN_2153280	0.016102	0.00803723	0.0454967	767		1
ILMN_2151488	0.0185605	0.00926532	0.045519	767	RMI1	9
ILMN_1862365	0.0081626	0.00407598	0.0455843	767
ILMN_1782032	0.00846189	0.00422572	0.0455992	767	ASH1L	1
ILMN_1794165	-0.0281788	0.0140723	0.0456038	767
ILMN_1809844	0.00803626	0.00401456	0.0456744	767
ILMN_1796762	-0.0310757	0.0155246	0.0456819	767	CCDC102A	16
ILMN_1727558	-0.00800021	0.00399732	0.0457155	767	MRPL27	17
ILMN_1673185	-0.0187551	0.00937154	0.0457279	767
ILMN_1753719	0.0141115	0.00705164	0.0457405	767
ILMN_1761044	0.0177339	0.00886203	0.0457463	767	GNB1L	22
ILMN_1779512	-0.00696469	0.00348105	0.045786	767	AP4M1	7
ILMN_1718925	0.00700691	0.00350285	0.045829	767	SYNE3	14
ILMN_1760727	0.0232696	0.0116353	0.0458752	767	ANG	14
ILMN_1815141	0.0127533	0.00637762	0.0458986	767	MTR	1
ILMN_1776516	0.0157339	0.00787017	0.0459556	767	ITPKA	15
ILMN_2155516	0.0155504	0.00777854	0.0459589	767	QTRT2	3
ILMN_2327860	-0.0520715	0.0260518	0.046	767	MAL	2
ILMN_1673069	-0.024783	0.0124017	0.0460441	767	DPP9	19
ILMN_1732452	0.0267431	0.0133837	0.0460628	767	MAPKAPK3	3
ILMN_1670256	0.00804564	0.00402728	0.0461065	767	PDK1	2
ILMN_1736353	0.0159702	0.00799433	0.0461163	767
ILMN_1765550	-0.00600416	0.00300612	0.0461577	767	HOMEZ	14
ILMN_1769665	-0.0200556	0.0100445	0.0462281	767
ILMN_1752741	0.0124804	0.00625067	0.04623	767	TRIM23	5
ILMN_1679520	-0.0237915	0.0119162	0.04624	767
ILMN_1715131	-0.0525613	0.0263274	0.0462521	767	CCR7	17
ILMN_1753275	-0.0122418	0.00613304	0.0462972	767	DENND1A	9
ILMN_1752117	0.0140489	0.00703906	0.0463178	767	TMEM55A	8
ILMN_1814737	0.0186333	0.00933729	0.0463474	767	LNPEP	5
ILMN_1800414	0.0155242	0.00778195	0.046422	767
ILMN_1813456	0.0220793	0.0110713	0.0464893	767
ILMN_1777526	0.0182769	0.00917283	0.0466836	767	MED20	6
ILMN_3231638	0.0238909	0.0119948	0.0467642	767	FAM160B1	10
ILMN_1670485	0.0055226	0.00277314	0.0467982	767		17
ILMN_1667707	0.0199985	0.0100445	0.0468501	767	SPCS3	4
ILMN_2067370	0.0136697	0.00686601	0.0468578	767
ILMN_1826609	0.00545295	0.00273923	0.046884	767
ILMN_1772286	0.0250068	0.0125648	0.0469347	767
ILMN_1693620	0.0177675	0.00892903	0.046975	767	PGM3	6
ILMN_1657729	0.0104479	0.00525141	0.0470095	767
ILMN_3248247	-0.018894	0.00949698	0.0470169	767
ILMN_1712298	0.0215793	0.0108479	0.0470406	767	ANKRD46	8
ILMN_1724376	0.0242133	0.0121724	0.0470484	767	ERLEC1	2
ILMN_1702171	0.0158951	0.00799083	0.047051	767
ILMN_1727142	-0.0159105	0.00800079	0.0471124	767	IKBKB	8
ILMN_1665557	0.0133898	0.00673496	0.0471684	767	USP15	12
ILMN_2409754	-0.0111553	0.00561132	0.0471803	767	PRR5	22
ILMN_1811378	-0.0075514	0.00379945	0.0472365	767
ILMN_1681728	0.00647698	0.00326073	0.0473631	767
ILMN_2324998	0.01467	0.00738587	0.0473775	767	NGDN	14
ILMN_3203444	-0.011857	0.00596973	0.0473829	767	CERCAM	9
ILMN_1658513	0.00627594	0.00316056	0.0474361	767	IQSEC2	X
ILMN_3229812	0.0104954	0.00528711	0.047503	767	PI4KA	22
ILMN_1804530	-0.0421499	0.0212389	0.0475633	767
ILMN_1833415	0.00737386	0.00371594	0.0475825	767
ILMN_1745954	-0.0211815	0.0106746	0.0475926	767	CORO1C	12
ILMN_1801766	0.0200077	0.0100835	0.0476034	767
ILMN_1655734	0.0191583	0.00965549	0.0476046	767
ILMN_1805788	0.00713771	0.00359734	0.0476073	767	PPHLN1	12
ILMN_2051684	-0.0161963	0.00816305	0.0476156	767
ILMN_2146761	0.0245347	0.012366	0.0476205	767
ILMN_2382127	0.0101349	0.00511068	0.0477282	767
ILMN_1811909	-0.0494797	0.0249525	0.0477429	767
ILMN_1916462	0.00634541	0.00320057	0.0477843	767	PTPN9	15
ILMN_1715647	-0.0112483	0.00567482	0.0478343	767	VANGL2	1
ILMN_1708991	-0.0165227	0.00833578	0.0478344	767	CCNY	10
ILMN_1787326	0.011134	0.00561722	0.0478368	767	SNORA65	9
ILMN_1676986	-0.0243992	0.0123205	0.0480323	767
ILMN_1727574	-0.0203794	0.0102907	0.0480343	767	ZNF827	4
ILMN_1668795	0.00644864	0.00325724	0.0480987	767
ILMN_1709937	-0.0253854	0.0128254	0.0481532	767	KCNN4	19
ILMN_1704362	-0.00778149	0.00393161	0.0481632	767	ZNF174	16
ILMN_1802780	0.0313826	0.0158624	0.0482521	767	CD163L1	12
ILMN_3255792	-0.0171375	0.0086629	0.0482705	767
ILMN_1807894	0.00603036	0.00304852	0.048286	767	SLC7A8	14
ILMN_2311041	0.02211	0.0111784	0.048308	767	MRPL52	14
ILMN_3284584	-0.0161745	0.00817862	0.0483394	767
ILMN_1679979	-0.00657147	0.00332371	0.0483966	767	PLK3	1
ILMN_1708375	0.0294756	0.0149088	0.0484069	767	IRF1	5
ILMN_1791770	-0.0201541	0.0101947	0.0484223	767		12
ILMN_1695590	0.0107535	0.00544033	0.0484561	767	ADRB2	5
ILMN_1712211	0.0101524	0.00513695	0.0484873	767	ZNF131	5
ILMN_1688971	0.0184049	0.00931322	0.0485025	767
ILMN_2413650	0.0161181	0.00815747	0.048542	767
ILMN_1685403	0.0925684	0.0468528	0.0485577	767
ILMN_2330112	0.0237257	0.0120087	0.0485603	767	CNIH1	14
ILMN_1672738	-0.0256984	0.0130073	0.0485623	767
ILMN_1759154	-0.0284317	0.014392	0.0485802	767
ILMN_1697088	-0.0119552	0.00605629	0.0487534	767	ARMC5	16
ILMN_1663390	0.025803	0.013074	0.0487982	767
ILMN_1774336	0.0155592	0.00788449	0.048824	767	POLE2	14
ILMN_1742473	0.00633883	0.00321249	0.0488473	767	VSTM4	10
ILMN_2119793	0.00946752	0.00479857	0.0488698	767	ANKRD34A	1
ILMN_1838702	0.0095103	0.00482051	0.048882	767		X
ILMN_2223350	0.0135685	0.00687909	0.0489343	767	SPRYD7	13
ILMN_1700202	0.0154406	0.00782979	0.0489782	767	TMEM135	11
ILMN_3239181	0.0196799	0.00998061	0.0490039	767	ITPRIP	10
ILMN_3280020	-0.0313803	0.0159191	0.0490704	767
ILMN_1775100	0.0058249	0.00295519	0.0490889	767
ILMN_1659727	0.0120732	0.00612576	0.0491094	767	CDAN1	15
ILMN_1795474	-0.0282043	0.014311	0.0491182	767
ILMN_3244836	0.00612884	0.00311121	0.0492207	767	ZNF836	19
ILMN_1703886	-0.00887094	0.0045032	0.0492213	767	SLC16A2	X
ILMN_3245310	-0.0161127	0.00818167	0.0492849	767	CCDC94	19
ILMN_2235707	0.0113285	0.00575338	0.0493256	767
ILMN_1777745	0.0175469	0.00891169	0.0493294	767	FAM133B	7
ILMN_1681670	-0.0237791	0.0120776	0.0493433	767	SLC25A4	4
ILMN_1654318	-0.00875211	0.00444613	0.0493872	767	PTPN23	3
ILMN_1651767	-0.0172768	0.00877699	0.0493938	767	MKL1	22
ILMN_1679150	0.00797378	0.00405125	0.0494157	767	SVIL-AS1	10
ILMN_3210538	-0.0263548	0.0133911	0.0494319	767
ILMN_1811696	-0.00958694	0.00487222	0.0494797	767	FDXR	17
ILMN_1751378	0.0166002	0.00844084	0.0495981	767	RARS	5
ILMN_1746917	-0.0209053	0.0106347	0.049701	767
ILMN_2334243	-0.018467	0.00939463	0.0497076	767
ILMN_1751692	0.0132941	0.00676497	0.0497728	767	ZNF17	19
ILMN_3225761	-0.0430012	0.0218831	0.0497844	767
ILMN_1690706	0.0152832	0.00777826	0.0498055	767
ILMN_1748407	-0.00786813	0.00400447	0.0498077	767
ILMN_1699856	-0.0284731	0.014492	0.0498191	767	RALGDS	9
ILMN_1674050	0.00940737	0.00478879	0.049852	767	COL8A2	1
ILMN_1757186	-0.0136804	0.00696428	0.0498619	767	GIMAP1	7
ILMN_1749011	-0.0205901	0.0104821	0.049868	767	NECAP2	1
ILMN_1674620	0.0390064	0.0198575	0.0498681	767	SGCE	7
ILMN_3274045	-0.0189633	0.00965434	0.0498784	767	STK17B	2
ILMN_1667592	-0.00919787	0.00468342	0.0499144	767	PARVB	22
ILMN_3247444	0.00720946	0.0036713	0.0499355	767	SNHG5	6
ILMN_2375386	-0.026222	0.0133543	0.0499562	767
ILMN_1721614	-0.00599044	0.00305161	0.0500167	767
ILMN_2337655	0.0248137	0.0126408	0.0500235	767	WARS	14
ILMN_2194009	0.0252582	0.0128683	0.0500422	767	ABCC4	13
ILMN_1755897	0.0652398	0.0332388	0.0500494	767
ILMN_1750511	-0.0246263	0.0125494	0.0500977	767	NT5C3B	17
ILMN_1809259	0.0279598	0.01425	0.0501274	767	HRASLS2	11
ILMN_1908133	0.0170474	0.00869023	0.0501763	767
ILMN_3243514	-0.00673668	0.00343461	0.0502066	767		4
ILMN_1799062	-0.0299819	0.015289	0.0502525	767
ILMN_2049184	-0.0399071	0.0203519	0.0502716	767	DNASE1L3	3
ILMN_1756049	0.0157282	0.00802252	0.0503131	767	NT5DC3	12
ILMN_1789502	0.0313564	0.0159964	0.0503467	767	GPC4	X
ILMN_1801098	0.00884989	0.00451545	0.0503818	767	TSLP	5
ILMN_1768197	0.0184593	0.00941954	0.050409	767	PTBP3	9
ILMN_1775073	0.00917186	0.00468044	0.0504168	767	ZNF273	7
ILMN_2260500	-0.00682214	0.0034819	0.0504518	767	KIAA0319L	1
ILMN_3245914	0.00650092	0.00331852	0.0504913	767
ILMN_1771689	0.0142866	0.00729332	0.0505048	767	EXD2	14
ILMN_1680831	-0.0174617	0.00891574	0.0505443	767	BAZ1B	7
ILMN_3306978	-0.00699298	0.0035713	0.0505942	767	MRGPRG-AS1	11
ILMN_1859531	0.00945153	0.00482703	0.0506013	767
ILMN_2158594	0.0134668	0.00688014	0.0506837	767	R3HCC1L	10
ILMN_2368597	-0.0294457	0.015046	0.0507195	767	SMG7	1
ILMN_1913241	0.00584878	0.00298981	0.0508136	767
ILMN_1655382	-0.0116301	0.00594605	0.0508491	767	DCLRE1B	1
ILMN_2218401	-0.007544	0.00385766	0.0508905	767
ILMN_1809027	-0.0145954	0.00746389	0.0509055	767	ATP5SL	19
ILMN_1772719	0.0172994	0.00884777	0.050933	767	GPN1	2
ILMN_1741392	-0.0147131	0.00752593	0.0509622	767	SLC25A20	3
ILMN_1784299	-0.0205502	0.0105132	0.0509955	767	C19orf43	19
ILMN_1679194	0.0690245	0.0353147	0.0510129	767
ILMN_1790971	-0.0154009	0.00788036	0.0510384	767
ILMN_1882348	0.00584118	0.00298944	0.0510861	767
ILMN_3237679	0.0165682	0.00848166	0.0511485	767	PTAR1	9
ILMN_1666715	-0.00773282	0.00395991	0.0512235	767	NSD3	8
ILMN_2061185	-0.0158726	0.00813029	0.0512825	767	SH2B1	16
ILMN_1739821	0.0169614	0.00868883	0.051305	767	EIF2S1	14
ILMN_3233442	-0.0284447	0.0145732	0.0513332	767
ILMN_1735910	0.00530323	0.00271768	0.05139	767	VMO1	17
ILMN_2294978	0.0104391	0.00534998	0.0514064	767	ANG	14
ILMN_1769705	-0.0204114	0.0104614	0.0514217	767
ILMN_1786759	0.0148553	0.00761485	0.0514556	767
ILMN_1714278	0.0135762	0.00695932	0.0514598	767
ILMN_1695354	-0.0194788	0.0099875	0.051517	767	BMF	15
ILMN_1763310	-0.0133045	0.00682237	0.0515398	767
ILMN_1766832	-0.00836113	0.00429012	0.0516827	767		6
ILMN_1757604	-0.0297843	0.0152858	0.0517343	767
ILMN_1751351	0.00840495	0.00431381	0.0517481	767	C6orf132	6
ILMN_3296979	-0.0122856	0.00630619	0.0517718	767
ILMN_1765520	0.0160732	0.00825117	0.0517943	767	MTIF2	2
ILMN_1785037	0.014794	0.00759573	0.0518337	767	SSR2	1
ILMN_1828216	-0.00659642	0.00338812	0.0519226	767	AGO3	1
ILMN_1908996	0.0126892	0.00651793	0.051936	767
ILMN_2133936	0.013988	0.00718522	0.0519405	767	ZFP1	16
ILMN_2414679	-0.00967916	0.00497308	0.0519967	767
ILMN_1781580	-0.0186148	0.00956562	0.0520324	767
ILMN_1732182	-0.00809911	0.00416204	0.0520403	767
ILMN_1681221	0.0104292	0.00536013	0.0520709	767	CCDC107	9
ILMN_1670472	0.0161493	0.00830029	0.0520777	767	FAF2	5
ILMN_2412549	0.018436	0.00947652	0.0521012	767	GAR1	4
ILMN_1707551	0.021789	0.0112017	0.052137	767	AFMID	17
ILMN_1716563	-0.0250307	0.0128755	0.0522691	767	PRKCB	16
ILMN_1859293	0.00784771	0.00403729	0.0522983	767
ILMN_1865043	0.00534563	0.00275032	0.0523192	767
ILMN_1691444	-0.0167194	0.00860444	0.0523828	767	UHRF2	9
ILMN_1705384	-0.0128894	0.00663617	0.0524813	767
ILMN_1727098	-0.0236178	0.0121609	0.0525037	767	PPP1R16B	20
ILMN_1807439	-0.00935281	0.00481702	0.0525636	767	ALDH1A3	15
ILMN_3237067	0.010486	0.00540186	0.0526175	767
ILMN_2089875	-0.0417745	0.02153	0.0527244	767	TNFSF4	1
ILMN_1760858	-0.0137187	0.00707057	0.0527288	767	RAB8A	19
ILMN_2273796	-0.00582229	0.0030009	0.0527383	767	ANKZF1	2
ILMN_1688322	-0.019174	0.00988535	0.0528048	767	ADIPOR1	1
ILMN_1711247	0.0055619	0.00286776	0.0528264	767	TRIM24	7
ILMN_1661342	-0.0270241	0.0139362	0.0528669	767	2006-09-01	X
ILMN_1691112	0.0205252	0.0105856	0.052884	767	PIGN	18
ILMN_1692464	-0.0183616	0.00947342	0.0529771	767
ILMN_3272826	0.00600006	0.00309619	0.0530182	767	IPPK	9
ILMN_1806633	0.00658029	0.00339568	0.0530235	767
ILMN_3271081	0.0115565	0.00596367	0.0530261	767
ILMN_1684694	0.0101201	0.00522258	0.0530346	767	ANK1	8
ILMN_1737651	0.0131894	0.00681003	0.0531563	767
ILMN_1728660	0.0137586	0.00710537	0.0532051	767	PMPCB	7
ILMN_1804820	0.0115002	0.00593965	0.0532281	767	ZNF431	19
ILMN_1810937	0.00702063	0.00362746	0.0533217	767	MPZ	1
ILMN_1695468	-0.0129142	0.00667445	0.0533875	767	SRPK2	7
ILMN_2397024	-0.0186167	0.00962347	0.0534322	767	SPOP	17
ILMN_1664956	-0.0159744	0.00825985	0.0534978	767	SSU72	1
ILMN_1671925	-0.00936235	0.00484125	0.0535111	767
ILMN_3219340	-0.0156157	0.00807506	0.0535169	767
ILMN_1665630	-0.0109371	0.00565629	0.0535432	767
ILMN_1682896	0.017678	0.00914383	0.0535777	767	PAXBP1	21
ILMN_1765082	-0.0182212	0.00943072	0.0537283	767	RBM10	X
ILMN_3293367	-0.0200507	0.0103787	0.0537526	767
ILMN_2087989	0.0140902	0.00729346	0.0537544	767
ILMN_1753795	0.0111547	0.00577427	0.0537674	767	SOCS4	14
ILMN_3205424	-0.00638066	0.00330301	0.0537707	767
ILMN_2339863	-0.0235529	0.012193	0.0537817	767
ILMN_1720241	-0.0178108	0.00922101	0.0537978	767	TRIP12	2
ILMN_1680996	0.0349506	0.0180992	0.0538591	767
ILMN_1692896	-0.0122645	0.00635199	0.0538889	767	SNAP47	1
ILMN_1794510	-0.014191	0.0073506	0.0539157	767
ILMN_3275672	-0.0304384	0.0157706	0.053981	767
ILMN_3239236	0.00954645	0.00494631	0.0539877	767	FBXL19-AS1	16
ILMN_2317658	-0.020436	0.0105888	0.0539942	767	SLC3A2	11
ILMN_1689828	-0.00879615	0.00455972	0.0541017	767		19
ILMN_1719256	0.0227804	0.0118132	0.0541893	767
ILMN_1725594	0.015057	0.00781087	0.0542759	767	MINDY3	10
ILMN_1769091	0.0170794	0.0088613	0.0543121	767	PRCP	11
ILMN_1863401	-0.00669228	0.00347303	0.0543719	767		2
ILMN_1798212	-0.0132086	0.00685608	0.0544193	767	LLGL1	17
ILMN_2044453	0.0204986	0.0106403	0.0544247	767	LPAR5	12
ILMN_1788887	-0.00772196	0.00400933	0.0544888	767	LINC01089	12
ILMN_1750693	0.0217782	0.0113095	0.0545303	767	SSR1	6
ILMN_1810385	0.00693613	0.00360253	0.0545696	767	ATR	3
ILMN_3186410	0.00799252	0.00415207	0.0546199	767
ILMN_1737380	0.0162465	0.0084405	0.0546349	767	BCAP29	7
ILMN_1707481	-0.011548	0.00599973	0.0546453	767	ZBTB44	11
ILMN_1687506	0.0055815	0.0029	0.0546565	767	XXYLT1	3
ILMN_1763628	0.00732194	0.00380431	0.0546585	767
ILMN_1749006	-0.0166748	0.00866392	0.0546604	767	RCSD1	1
ILMN_1692938	0.0315539	0.016395	0.0546624	767	PSAT1	9
ILMN_1880103	0.0102966	0.0053529	0.0547953	767
ILMN_2319910	-0.0147252	0.00765689	0.0548475	767	DGKA	12
ILMN_1795905	-0.0121966	0.00634317	0.0548911	767	ZBTB4	17
ILMN_1774733	-0.0285809	0.0148659	0.0549174	767	SOCS1	16
ILMN_1713162	-0.0133263	0.0069317	0.0549251	767	GSTM2	1
ILMN_2358541	0.00783576	0.00407584	0.0549286	767
ILMN_3187623	0.00661834	0.00344347	0.0549911	767	SYCE1L	16
ILMN_2372639	-0.0217555	0.0113193	0.0549913	767		19
ILMN_1678252	0.0109443	0.00569431	0.0549943	767	HDLBP	2
ILMN_2358382	-0.00875402	0.00455481	0.0549994	767
ILMN_1652300	0.00857271	0.00446053	0.0550026	767	ZNF507	19
ILMN_1801124	0.0190399	0.00991065	0.055097	767	MSANTD4	11
ILMN_3261197	-0.0181015	0.00942298	0.0551176	767	ATP5E	20
ILMN_2354211	0.0117728	0.00612891	0.0551334	767
ILMN_3308490	-0.00836278	0.00435547	0.0552349	767	TMEM42	3
ILMN_1772690	-0.0196868	0.0102585	0.0553595	767
ILMN_1798224	-0.0117759	0.00613636	0.0553644	767	KDM5C	X
ILMN_3240962	0.0130077	0.0067786	0.0553776	767	DDRGK1	20
ILMN_1859661	-0.00575806	0.00300132	0.0554318	767
ILMN_1748819	0.0149218	0.00777867	0.0554594	767	MRPL22	5
ILMN_1679796	0.0186495	0.00972194	0.0554602	767
ILMN_1712184	0.012392	0.00646081	0.0554939	767	HIST1H3C	6
ILMN_1708151	-0.022744	0.0118584	0.0555004	767
ILMN_1749317	-0.00598844	0.0031227	0.0555334	767	CFAP74	1
ILMN_2291619	-0.0163362	0.00851968	0.0555645	767
ILMN_1659524	0.0218822	0.0114175	0.0556809	767
ILMN_1664098	-0.0206698	0.0107854	0.0556927	767	FASTK	7
ILMN_1833858	0.0217032	0.011326	0.0557213	767	ADD2	2
ILMN_1717403	0.0157886	0.00823967	0.0557303	767	ARHGEF39	9
ILMN_1685661	0.0194098	0.0101337	0.0558305	767	RRP15	1
ILMN_2196984	0.0185011	0.00966083	0.0558712	767	OIP5-AS1	15
ILMN_2246894	-0.0209953	0.0109645	0.0558989	767	EDF1	9
ILMN_1826351	0.00752538	0.00393005	0.0559005	767		11
ILMN_3180557	-0.0123818	0.00646671	0.0559169	767	CYB561D1	1
ILMN_1655755	0.00618369	0.00322963	0.0559205	767
ILMN_1901289	0.00506873	0.00264775	0.0559611	767	LINC00662	19
ILMN_1761915	0.00570796	0.0029827	0.0560467	767	BRWD1	21
ILMN_1858599	0.0169387	0.00885158	0.0560528	767	RBM43	2
ILMN_1815924	0.0155407	0.00812229	0.0560917	767	NUP107	12
ILMN_2089616	-0.0125743	0.00657213	0.0561003	767	FBXO10	9
ILMN_2332691	-0.00897699	0.00469221	0.0561133	767		15
ILMN_1780188	0.00871682	0.00455685	0.0561468	767	B3GALNT2	1
ILMN_2340877	-0.0158489	0.00828577	0.0561627	767	MEN1	11
ILMN_1768719	0.0163648	0.00855564	0.0561664	767	RDH11	14
ILMN_3242462	0.0163212	0.00853579	0.0562521	767	UHRF1BP1	6
ILMN_1914891	0.00563429	0.0029472	0.0562962	767
ILMN_1726169	-0.0247834	0.0129651	0.0563225	767	EDF1	9
ILMN_1678004	0.0176372	0.00922733	0.0563391	767
ILMN_2324672	-0.034097	0.0178388	0.0563405	767	USF2	19
ILMN_1674996	-0.00733165	0.00383723	0.0564354	767	UNKL	16
ILMN_1763162	0.0155497	0.00813948	0.0564682	767	DPH2	1
ILMN_1907100	0.00688883	0.00360615	0.0564818	767		15
ILMN_1734909	0.00809989	0.0042403	0.0564927	767	CUZD1	10
ILMN_1699987	0.0149838	0.00784468	0.0565138	767	MANEA	6
ILMN_1911594	0.00744706	0.00389916	0.0565313	767
ILMN_2341793	-0.0207334	0.0108569	0.0565591	767	CCT7	2
ILMN_2103685	0.0213324	0.0111713	0.0565748	767	DEPDC1B	5
ILMN_1698996	0.0209091	0.0109517	0.0566228	767	SLC19A1	21
ILMN_1682493	0.00587855	0.0030792	0.0566346	767	LINC01284	X
ILMN_2209614	0.00644828	0.0033777	0.0566401	767	ODF3B	22
ILMN_1708881	0.00888266	0.00465569	0.0567902	767	RAB20	13
ILMN_1827779	0.0066708	0.00349646	0.0567957	767
ILMN_2347592	0.00814588	0.00427026	0.0568332	767	NMB	15
ILMN_1917001	-0.00631981	0.00331528	0.0570033	767		8
ILMN_1659874	-0.0240124	0.012598	0.0570326	767	SCAF4	21
ILMN_3240524	0.0188504	0.00988981	0.0570334	767	MFSD6	2
ILMN_1871107	0.00566919	0.00297469	0.057063	767
ILMN_1703718	-0.0231838	0.0121652	0.0570722	767
ILMN_1668713	0.00647265	0.00339641	0.0570732	767	GABPB2	1
ILMN_1656149	0.00710168	0.00372659	0.05708	767	C11orf80	11
ILMN_1667405	-0.0122911	0.00645016	0.0570969	767	ARHGEF39	9
ILMN_3215712	-0.0301024	0.0158068	0.0572474	767
ILMN_1740920	0.00717029	0.00376541	0.0572661	767	ACADSB	10
ILMN_1661424	0.013958	0.00732994	0.0572662	767	THAP6	4
ILMN_1787280	0.0156665	0.00822764	0.0572811	767	AUNIP	1
ILMN_1714489	-0.00615645	0.00323494	0.0574146	767	CIB2	15
ILMN_1729157	0.017174	0.00902421	0.057416	767		12
ILMN_1756937	0.0166662	0.00875749	0.0574185	767	ST8SIA4	5
ILMN_1813650	0.00989775	0.00520143	0.0574436	767	INPP5F	10
ILMN_1751753	-0.0290699	0.0152795	0.0574902	767	IDH2	15
ILMN_1690136	-0.0113793	0.00598127	0.0574966	767	NIPBL	5
ILMN_1715947	-0.0324212	0.0170417	0.0574992	767
ILMN_1679912	0.0166018	0.0087323	0.0576664	767
ILMN_1792837	-0.0143302	0.0075385	0.0577004	767	CIAO1	2
ILMN_1657760	-0.00927232	0.0048783	0.0577272	767	SYT17	16
ILMN_2230902	0.016095	0.00846782	0.0577273	767	CTNNA1	5
ILMN_2222065	0.00762684	0.00401314	0.0577611	767	FZD1	7
ILMN_1788810	0.01379	0.00725618	0.0577632	767	NAA25	12
ILMN_1787657	0.0174458	0.00918002	0.0577688	767	CLDN12	7
ILMN_1773819	0.0106591	0.0056106	0.0578472	767	TMLHE	X
ILMN_2414014	0.0127678	0.00672179	0.0578931	767	RBM10	X
ILMN_1676515	0.0213502	0.0112404	0.0578981	767
ILMN_2371590	-0.0257787	0.0135723	0.057907	767	DDX17	22
ILMN_1742962	0.00587131	0.00309179	0.0579545	767	CLEC6A	12
ILMN_3297996	-0.03489	0.0183732	0.0579594	767
ILMN_1838575	0.00549204	0.0028923	0.0579742	767	DCN	12
ILMN_2251766	-0.0110105	0.00579865	0.0579789	767	IL1R2	2
ILMN_1748083	0.00574238	0.00302452	0.0580059	767	RASGRF1	15
ILMN_1695280	-0.00759482	0.00400171	0.0581002	767	HIC1	17
ILMN_1674759	-0.0137849	0.00726397	0.0581237	767	LPCAT4	15
ILMN_3297945	-0.0244693	0.0128961	0.0581634	767	UBA1	X
ILMN_1756360	-0.0155166	0.00817914	0.058206	767
ILMN_1762725	-0.0176746	0.00931763	0.0582314	767
ILMN_1778238	0.0139769	0.00736898	0.058254	767
ILMN_2214713	0.00521694	0.00275064	0.0582673	767	C4orf36	4
ILMN_3245093	0.00575406	0.00303493	0.0583573	767
ILMN_1736568	-0.0155407	0.00819839	0.0584063	767	CASP2	7
ILMN_1676128	-0.00937179	0.00494477	0.0584441	767	DNMT3A	2
ILMN_1703074	0.0151096	0.00797273	0.0584623	767
ILMN_3235221	-0.0967245	0.0510431	0.0584884	767
ILMN_1689989	-0.0163297	0.00861744	0.0584891	767	AMN	14
ILMN_2339202	0.0286207	0.0151065	0.0585364	767	KTN1	14
ILMN_1851137	0.00558472	0.00294784	0.0585479	767
ILMN_2102693	0.0172494	0.00910511	0.058553	767	NUFIP2	17
ILMN_1660144	0.00754165	0.00398118	0.0585727	767
ILMN_1741175	0.0154384	0.00815099	0.0586091	767	RAB11FIP2	10
ILMN_1817973	0.00628841	0.00332023	0.05862	767
ILMN_1813625	-0.0178355	0.00941726	0.0586265	767	TRIM25	17
ILMN_1656413	0.021955	0.0115938	0.0586569	767	ZMPSTE24	1
ILMN_3307409	-0.0119575	0.0063148	0.0586731	767	RREB1	6
ILMN_1673711	-0.0191113	0.0100929	0.0586781	767
ILMN_1743175	0.00683749	0.00361104	0.0586824	767	PTPRT	20
ILMN_2055156	0.0282697	0.0149302	0.0586885	767	PAG1	8
ILMN_1738356	-0.0129875	0.00685926	0.0586921	767		7
ILMN_2302716	0.0179668	0.00948941	0.0587025	767	ALDH18A1	10
ILMN_1703140	0.0102048	0.00539022	0.0587204	767	NEDD4	15
ILMN_1714577	-0.0195059	0.0103032	0.0587244	767	OGDHL	10
ILMN_3283458	-0.0369906	0.0195434	0.0587837	767
ILMN_1728083	-0.0183645	0.00970266	0.0587853	767
ILMN_1776487	0.0155575	0.0082217	0.0588485	767	TADA1	1
ILMN_1680928	-0.0144481	0.00763541	0.0588498	767	DNM3	1
ILMN_1727553	0.0131937	0.00697363	0.0588908	767	ZBED8	5
ILMN_1659437	0.0133134	0.00703708	0.0588969	767
ILMN_1762861	-0.0361715	0.0191209	0.0589185	767
ILMN_1810577	-0.0201352	0.0106443	0.0589303	767
ILMN_1730995	-0.0183691	0.00971259	0.0589804	767	AFAP1L2	10
ILMN_1794740	-0.0103389	0.00546679	0.0589858	767	CD151	11
ILMN_1677829	0.0177935	0.00940946	0.0590123	767	SLC9A6	X
ILMN_1663356	0.00544973	0.00288213	0.059033	767	RPH3A	12
ILMN_2245523	0.00602257	0.00318563	0.0590767	767	TMEM202	15
ILMN_1876456	0.00681433	0.00360495	0.0591135	767
ILMN_1825186	-0.0235843	0.0124771	0.0591223	767
ILMN_1847822	-0.0191206	0.0101165	0.0591454	767
ILMN_2145518	0.0193454	0.0102359	0.0591561	767	TMEM126B	11
ILMN_1684802	0.0157206	0.00831985	0.0592125	767	TAF5	10
ILMN_2242937	0.0160138	0.00847513	0.0592157	767
ILMN_3244192	0.0106312	0.00562661	0.0592225	767
ILMN_1700507	-0.0149616	0.00792265	0.0593558	767	CLASP1	2
ILMN_1719170	0.0098145	0.00519746	0.059374	767	WBSCR27	7
ILMN_1807825	0.0261614	0.0138559	0.0594029	767	LY86	6
ILMN_1749447	-0.0415403	0.0220018	0.0594123	767
ILMN_2306661	-0.0295842	0.0156699	0.0594221	767	UNC13C	15
ILMN_3247645	0.0144176	0.00763741	0.0594509	767	NBDY	X
ILMN_1745389	0.00603996	0.00319979	0.05947	767	KIAA1328	18
ILMN_1763433	0.0161344	0.00854779	0.059479	767	TRIM9	14
ILMN_1786684	0.0092952	0.00492523	0.0595175	767
ILMN_2103295	0.0151266	0.00801656	0.0595638	767
ILMN_1916513	0.0088654	0.00469969	0.0596361	767	LINC01643	22
ILMN_2356654	0.0192013	0.0101795	0.0596505	767	LGALS8	1
ILMN_1757272	0.0145535	0.00771696	0.059699	767	THAP1	8
ILMN_1681367	0.00682857	0.00362101	0.059712	767	ZFP69	1
ILMN_2350357	0.0115758	0.00613955	0.0597617	767	ZNF254	19
ILMN_1657838	-0.00729627	0.00386991	0.0597708	767
ILMN_1778013	-0.0270083	0.014328	0.0598215	767	PDPR	16
ILMN_1652955	-0.0147881	0.00784609	0.0598531	767
ILMN_1815718	-0.00916589	0.00486446	0.0599228	767	BTRC	10
ILMN_3235185	-0.0116424	0.00617987	0.0599685	767	SNRNP200	2
ILMN_1790782	0.018583	0.0098645	0.0599817	767
ILMN_1673207	-0.00932555	0.00495054	0.0599925	767	KLF11	2
ILMN_1675693	-0.00685964	0.0036417	0.0600072	767	PPP2CB	8
ILMN_2242921	-0.00749568	0.00397978	0.0600336	767	IKZF2	2
ILMN_1724315	0.0133196	0.00707267	0.0600602	767	LMTK2	7
ILMN_1703013	0.016986	0.00902019	0.0600787	767	NOC4L	12
ILMN_1763907	0.0223735	0.0118816	0.0600877	767	CENPW	6
ILMN_1731648	0.0142945	0.00759171	0.0601064	767	FOXJ2	12
ILMN_1776216	0.0142973	0.00759367	0.0601214	767	MMGT1	X
ILMN_1706117	-0.0146818	0.00779992	0.0601891	767	RPS15AP17	4
ILMN_2390457	0.0100603	0.00534494	0.0602016	767	ESR2	14
ILMN_1676731	-0.00790832	0.00420164	0.0602024	767	ASB16-AS1	17
ILMN_2403247	-0.0318344	0.0169146	0.0602206	767	CMTM7	3
ILMN_1667306	-0.0169018	0.00898244	0.0602774	767	RANBP10	16
ILMN_1680465	0.0110412	0.00586805	0.0602863	767	ARL5B	10
ILMN_3242067	0.00716332	0.00380724	0.0602977	767
ILMN_3228294	-0.0259897	0.0138136	0.0603026	767
ILMN_1739423	-0.0186059	0.00989079	0.0603464	767
ILMN_3268993	0.0120909	0.00642831	0.0603817	767
ILMN_1673138	0.0177793	0.0094529	0.060389	767	ZBTB33	X
ILMN_1808568	-0.0247463	0.0131605	0.0604543	767	PYCR2	1
ILMN_1748836	-0.00686691	0.00365216	0.0604701	767	FUZ	19
ILMN_1654210	0.0176887	0.00941035	0.0605419	767	CD1C	1
ILMN_1832151	0.00893689	0.00475593	0.0606239	767
ILMN_1807072	-0.0091185	0.00485361	0.0606789	767	GOSR2	17
ILMN_1727050	0.00973794	0.00518572	0.0607974	767	PPFIA1	11
ILMN_1750278	-0.029131	0.0155141	0.0608153	767
ILMN_1843585	-0.00697688	0.00371565	0.060816	767	MBNL3	X
ILMN_1653220	-0.0269845	0.0143716	0.0608271	767	PITPNM1	11
ILMN_1729689	0.00574315	0.00305878	0.060831	767
ILMN_2137499	-0.00857439	0.00456714	0.0608565	767
ILMN_1688775	-0.00725826	0.0038669	0.0609093	767
ILMN_3292244	-0.0143188	0.00762879	0.060921	767
ILMN_1758705	0.0115387	0.00614801	0.0609373	767	IRX6	16
ILMN_1716426	0.00758263	0.0040402	0.0609407	767	ZFR2	19
ILMN_3250606	0.00543313	0.00289496	0.0609462	767
ILMN_2189869	0.0132252	0.00704752	0.0609705	767	FCF1	14
ILMN_1664833	0.0167393	0.0089217	0.0610167	767
ILMN_1671116	0.0172199	0.00917808	0.0610228	767	XXYLT1	3
ILMN_1686553	0.0156417	0.00833736	0.0610364	767	INTS2	17
ILMN_1736311	-0.018403	0.00980955	0.0610456	767	POU2F2	19
ILMN_1858668	0.00718291	0.00382888	0.0610526	767		20
ILMN_1690307	0.0188326	0.0100406	0.0610998	767
ILMN_2087629	-0.0064421	0.00343466	0.0611023	767	NOL4	18
ILMN_1658992	0.0165858	0.00884372	0.0611272	767	DPM1	20
ILMN_1784166	0.00608428	0.003245	0.0611916	767
ILMN_1800197	0.0164792	0.00879145	0.0612617	767
ILMN_3245270	0.00753355	0.00401933	0.0612798	767
ILMN_1705876	-0.023861	0.0127314	0.0613002	767
ILMN_1792356	0.0337882	0.0180304	0.0613308	767	DPYSL4	10
ILMN_1796775	0.00757609	0.00404289	0.0613351	767	RLN1	9
ILMN_1722985	-0.00592612	0.00316259	0.0613504	767
ILMN_1743767	-0.00944949	0.00504438	0.0614261	767	ZNF446	19
ILMN_3237636	-0.0118659	0.00633817	0.0615836	767	CLUHP3	16
ILMN_1788607	-0.0189975	0.0101491	0.0616239	767
ILMN_1783469	0.0161229	0.00861372	0.0616331	767
ILMN_2386205	-0.0240681	0.0128604	0.0616729	767
ILMN_2393994	0.0151055	0.00807287	0.0617209	767	CSPP1	8
ILMN_1713402	-0.0111114	0.00593971	0.0617822	767	FAM160A2	11
ILMN_1821769	0.00572397	0.00305994	0.0617938	767
ILMN_2048982	0.0167512	0.00895554	0.0618116	767	ZBTB25	14
ILMN_1807397	0.0159448	0.00852479	0.061824	767	NDUFB5	3
ILMN_2341626	-0.00810405	0.00433315	0.0618454	767
ILMN_1731783	-0.0300688	0.0160794	0.0618762	767	ATP1A1	1
ILMN_1737211	-0.013765	0.00736213	0.0619201	767	ZNF585A	19
ILMN_1772964	-0.00617032	0.00330069	0.0619624	767	CCL8	17
ILMN_1767320	-0.0150962	0.00807584	0.0619758	767	MAPK1	22
ILMN_2415467	0.00768742	0.00411439	0.0620991	767
ILMN_1760441	-0.0196912	0.010539	0.0621013	767	MRPS5	2
ILMN_1677607	0.0242685	0.0129926	0.0621764	767	SC5D	11
ILMN_2380839	-0.0299724	0.0160474	0.0621948	767	SNRNP70	19
ILMN_1717554	-0.00629464	0.00337073	0.0622358	767		17
ILMN_1761176	-0.0170912	0.00915232	0.0622391	767	GRIPAP1	X
ILMN_2043918	0.0171126	0.00916403	0.0622472	767	DLEU1	13
ILMN_2096405	0.0162635	0.00870941	0.0622498	767
ILMN_1669433	-0.0205789	0.0110205	0.0622525	767	ZSWIM8	10
ILMN_1697348	-0.0187883	0.0100627	0.0622811	767	WBSCR22	7
ILMN_1768097	0.0187067	0.0100196	0.0622959	767	RPGR	X
ILMN_3236169	0.00761125	0.00407675	0.0622994	767		7
ILMN_1720438	0.0136902	0.0073343	0.0623548	767
ILMN_1720303	0.0125465	0.00672173	0.0623586	767	OSTM1	6
ILMN_1699071	0.029218	0.0156537	0.0623647	767	MAP3K7CL	21
ILMN_1735798	0.0104018	0.00557383	0.0624109	767	OSBPL3	7
ILMN_1852827	0.00520294	0.00278824	0.0624336	767	FABP3	1
ILMN_1700307	-0.00583147	0.00312507	0.0624339	767
ILMN_1665884	-0.00667073	0.00357506	0.0624506	767		12
ILMN_3246747	0.00653571	0.00350285	0.0624619	767
ILMN_2397721	0.0146109	0.00783238	0.0625153	767	GLB1	3
ILMN_2373763	0.0227693	0.0122125	0.0626588	767	CASP7	10
ILMN_3181695	0.0165697	0.00888784	0.0626748	767	LSM3P4	4
ILMN_1695645	0.0140564	0.00754026	0.0626925	767	CETN2	X
ILMN_1806745	0.00657901	0.00352974	0.0627357	767	ELF4	X
ILMN_2232430	0.0193312	0.0103722	0.0627539	767
ILMN_1678323	0.00739412	0.00396744	0.062761	767
ILMN_1804384	-0.0227418	0.0122041	0.062796	767
ILMN_2075189	0.0184114	0.00988391	0.0628919	767	SLC35F2	11
ILMN_1659017	0.023525	0.0126317	0.0629459	767	C11orf74	11
ILMN_3176746	0.012606	0.00677107	0.0630373	767	TMPO-AS1	12
ILMN_2093500	0.0168293	0.00904055	0.0630666	767	ZBED5	11
ILMN_1785345	0.0139374	0.00748706	0.063067	767	GPR84	12
ILMN_1691702	-0.0143628	0.00771583	0.0630749	767	ZNF775	7
ILMN_1724207	-0.0201314	0.0108166	0.0631188	767	IVD	15
ILMN_1686623	0.0127799	0.0068669	0.0631284	767	CSF1R	5
ILMN_1773760	0.0154087	0.00828132	0.0631896	767	PAICS	4
ILMN_3279640	0.00792538	0.00425957	0.0631977	767	WDR86	7
ILMN_1800008	0.0147724	0.00794133	0.0632567	767
ILMN_1722186	0.0120163	0.00646088	0.0633048	767	NDUFAF7	2
ILMN_3244969	-0.00744175	0.00400173	0.0633354	767	ZNF48	16
ILMN_2163723	-0.00854336	0.00459439	0.0633513	767	KRT7	12
ILMN_1696974	0.0126575	0.00681118	0.0635177	767	ANG	14
ILMN_1722774	-0.0158237	0.00851511	0.0635224	767	VPS72	1
ILMN_1793651	0.0154117	0.00829408	0.0635447	767	UBE2N	12
ILMN_1748923	0.0186177	0.0100216	0.0636026	767	SMC2	9
ILMN_1743194	0.00737543	0.00397036	0.0636204	767	EEA1	12
ILMN_1692947	0.0090558	0.00487703	0.0637338	767	PROSER3	19
ILMN_2104967	0.0171822	0.00925395	0.0637462	767
ILMN_1767147	0.00660571	0.00355845	0.0638031	767		18
ILMN_1747119	-0.0183959	0.00990992	0.063807	767	FBXO46	19
ILMN_2367782	-0.0247644	0.0133412	0.0638186	767	STARD7	2
ILMN_1683811	-0.020213	0.0108908	0.0638554	767
ILMN_3236122	0.00911429	0.00491198	0.0639202	767
ILMN_1686082	-0.00598958	0.00322807	0.0639278	767	C14orf79	14
ILMN_1773643	0.0131676	0.00709745	0.063958	767	SLC38A9	5
ILMN_1671292	-0.00919528	0.00495889	0.0640948	767
ILMN_1784130	-0.00674115	0.00363632	0.0641612	767
ILMN_1664828	0.0205628	0.0110945	0.0642206	767	APOBEC3H	22
ILMN_1698715	0.0134412	0.00725293	0.0642505	767	NHLRC2	10
ILMN_1718977	-0.0208572	0.0112551	0.0642629	767	GADD45B	19
ILMN_1708946	-0.015308	0.00826147	0.0642893	767	VPS4A	16
ILMN_1755926	-0.0179408	0.00968326	0.0643146	767
ILMN_3305772	-0.0160654	0.00867111	0.0643176	767
ILMN_2072541	0.0164913	0.0089014	0.0643292	767	RAB11FIP2	10
ILMN_1673117	0.00676447	0.00365139	0.0643427	767	ZWINT	10
ILMN_1864157	0.00471911	0.0025477	0.0643821	767
ILMN_1909886	0.0180584	0.00975015	0.0644089	767
ILMN_1752582	-0.0205496	0.0110962	0.064431	767
ILMN_2194106	-0.0127454	0.00688297	0.0644633	767	TSPAN12	7
ILMN_3224126	-0.0145569	0.00786199	0.0644888	767
ILMN_1658717	-0.00948472	0.0051238	0.064553	767	DEPDC5	22
ILMN_1652357	0.0177697	0.00959952	0.0645536	767	PDHX	11
ILMN_3245046	0.00701146	0.00378831	0.0645953	767
ILMN_1726840	0.00616157	0.00333038	0.064697	767
[truncated: 21,097 more rows]

## Sheet: Supplementary Table 7 IQ change
Supplementary Table 6. Transcriptome-wide association results for IQ change.
[truncated: 23,032 more rows]

[truncated: 12 more sheets: Supplementary Table 8 smwt, Supplementary Table 9 FEV1, Supplementary Table 10 gs, Supplementary Table 11 CRP, Supplementary Table 12 fibrin, Supplementary Table 13 HbA1C, Supplementary Table 14 cu v ne, Supplementary Table 15 for v ne, Supplementary Table 16 telomere, Supplementary Table 17 Hannum, Supplementary Table 18 Horvath, Supplementary Table 19 Survival]
